# Supplementary material
Source: publisher site journal article supplement (https://www.dovepress.com/get_supplementary_file.php?f=supplementary_file_10_51969.pdf)
Supplement: Supplementary file 1 [file get_supplementary_file.php]

**Table S10. Identification of putative miR-647 target sites predicted by TargetScan**

| Target gene | Representative transcript | Gene name                                                                      | Conserved sites |      |         |         | Poorly conserved sites |      |         |         | Representative miRNA | Total context+ score | Aggregate PCT | Links to sites in UTRs |
|-------------|---------------------------|--------------------------------------------------------------------------------|-----------------|------|---------|---------|------------------------|------|---------|---------|----------------------|----------------------|---------------|------------------------|
|             |                           |                                                                                | total           | 8mer | 7mer-m8 | 7mer-1A | total                  | 8mer | 7mer-m8 | 7mer-1A |                      |                      |               |                        |
| ARHGEF15    | NM_025014                 | Rho guanine nucleotide exchange factor (GEF) 15                                | 1               | 1    | 0       | 0       | 3                      | 2    | 0       | 1       | hsa-miR-647          | -1.25                | N/A           | Sites in UTR           |
| FAM109B     | NM_001002034              | family with sequence similarity 109, member B                                  | 0               | 0    | 0       | 0       | 3                      | 1    | 2       | 0       | hsa-miR-647          | -0.76                | N/A           | Sites in UTR           |
| MUDENG      | NM_018229                 | MU-2/AP1M2 domain containing, death-inducing                                   | 0               | 0    | 0       | 0       | 3                      | 1    | 1       | 1       | hsa-miR-647          | -0.76                | N/A           | Sites in UTR           |
| ICOS        | NM_012092                 | inducible T-cell co-stimulator                                                 | 1               | 1    | 0       | 0       | 1                      | 1    | 0       | 0       | hsa-miR-647          | -0.76                | N/A           | Sites in UTR           |
| WWTR1       | NM_001168278              | WW domain containing transcription regulator 1                                 | 0               | 0    | 0       | 0       | 2                      | 2    | 0       | 0       | hsa-miR-647          | -0.76                | N/A           | Sites in UTR           |
| PFKM        | NM_000289                 | phosphofructokinase, muscle                                                    | 1               | 1    | 0       | 0       | 1                      | 0    | 1       | 0       | hsa-miR-647          | -0.75                | N/A           | Sites in UTR           |
| THOC5       | NM_001002877              | THO complex 5                                                                  | 0               | 0    | 0       | 0       | 2                      | 1    | 0       | 1       | hsa-miR-647          | -0.69                | N/A           | Sites in UTR           |
| STRA6       | NM_001142617              | stimulated by retinoic acid gene 6 homolog (mouse)                             | 0               | 0    | 0       | 0       | 3                      | 1    | 2       | 0       | hsa-miR-647          | -0.69                | N/A           | Sites in UTR           |
| ATG7        | NM_001136031              | ATG7 autophagy related 7 homolog ( <i>S. cerevisiae</i> )                      | 2               | 0    | 1       | 1       | 1                      | 1    | 0       | 0       | hsa-miR-647          | -0.69                | N/A           | Sites in UTR           |
| RUNX2       | NM_001015051              | runt-related transcription factor 2                                            | 0               | 0    | 0       | 0       | 3                      | 0    | 2       | 1       | hsa-miR-647          | -0.68                | N/A           | Sites in UTR           |
| SLC7A1      | NM_003045                 | solute carrier family 7 (cationic amino acid transporter, y+ system), member 1 | 0               | 0    | 0       | 0       | 4                      | 2    | 2       | 0       | hsa-miR-647          | -0.68                | N/A           | Sites in UTR           |
| ATP8A2      | NM_016529                 | ATPase, aminophospholipid transporter, class I, type 8A, member 2              | 1               | 1    | 0       | 0       | 1                      | 1    | 0       | 0       | hsa-miR-647          | -0.66                | N/A           | Sites in UTR           |
| ZBTB37      | NM_001122770              | zinc finger and BTB domain containing 37                                       | 0               | 0    | 0       | 0       | 2                      | 1    | 1       | 0       | hsa-miR-647          | -0.65                | N/A           | Sites in UTR           |
| S1PR5       | NM_001166215              | sphingosine-1-phosphate receptor 5                                             | 0               | 0    | 0       | 0       | 2                      | 1    | 0       | 1       | hsa-miR-647          | -0.65                | N/A           | Sites in UTR           |
| TMEM143     | NM_018273                 | transmembrane protein 143                                                      | 1               | 0    | 0       | 1       | 1                      | 1    | 0       | 0       | hsa-miR-647          | -0.65                | N/A           | Sites in UTR           |

|           |              |                                                                                                                  |   |   |   |   |   |   |   |   |             |       |     |              |
|-----------|--------------|------------------------------------------------------------------------------------------------------------------|---|---|---|---|---|---|---|---|-------------|-------|-----|--------------|
| LMO4      | NM_006769    | LIM domain only 4                                                                                                | 1 | 0 | 1 | 0 | 1 | 1 | 0 | 0 | hsa-miR-647 | -0.65 | N/A | Sites in UTR |
| CUEDC1    | NM_017949    | CUE domain containing 1                                                                                          | 0 | 0 | 0 | 0 | 2 | 1 | 1 | 0 | hsa-miR-647 | -0.64 | N/A | Sites in UTR |
| CPEB2     | NM_001177381 | cytoplasmic polyadenylation element binding protein 2                                                            | 2 | 1 | 1 | 0 | 0 | 0 | 0 | 0 | hsa-miR-647 | -0.64 | N/A | Sites in UTR |
| LOC284385 | NM_001242812 | hypothetical LOC284385                                                                                           | 0 | 0 | 0 | 0 | 4 | 0 | 1 | 3 | hsa-miR-647 | -0.64 | N/A | Sites in UTR |
| COMMD9    | NM_001101653 | COMM domain containing 9                                                                                         | 0 | 0 | 0 | 0 | 3 | 1 | 2 | 0 | hsa-miR-647 | -0.64 | N/A | Sites in UTR |
| C11orf21  | NM_001142946 | chromosome 11 open reading frame 21                                                                              | 0 | 0 | 0 | 0 | 4 | 0 | 3 | 1 | hsa-miR-647 | -0.64 | N/A | Sites in UTR |
| HADHA     | NM_000182    | hydroxyacyl-CoA dehydrogenase/3-ketoacyl-CoA thiolase/enoyl-CoA hydratase (trifunctional protein), alpha subunit | 0 | 0 | 0 | 0 | 3 | 1 | 0 | 2 | hsa-miR-647 | -0.63 | N/A | Sites in UTR |
| UBE2Q2    | NM_001145335 | ubiquitin-conjugating enzyme E2Q family member 2                                                                 | 0 | 0 | 0 | 0 | 2 | 1 | 0 | 1 | hsa-miR-647 | -0.63 | N/A | Sites in UTR |
| PTTG1IP   | NM_004339    | pituitary tumor-transforming 1 interacting protein                                                               | 1 | 0 | 1 | 0 | 1 | 0 | 1 | 0 | hsa-miR-647 | -0.62 | N/A | Sites in UTR |
| BMP1      | NM_006129    | bone morphogenetic protein 1                                                                                     | 0 | 0 | 0 | 0 | 2 | 1 | 0 | 1 | hsa-miR-647 | -0.61 | N/A | Sites in UTR |
| IL1RAP    | NM_001167930 | interleukin 1 receptor accessory protein                                                                         | 0 | 0 | 0 | 0 | 2 | 0 | 2 | 0 | hsa-miR-647 | -0.6  | N/A | Sites in UTR |
| NETO1     | NM_138966    | neuropilin (NRP) and tolloid (TLL)-like 1                                                                        | 0 | 0 | 0 | 0 | 2 | 1 | 0 | 1 | hsa-miR-647 | -0.6  | N/A | Sites in UTR |
| VSTM4     | NM_001031746 | V-set and transmembrane domain containing 4                                                                      | 0 | 0 | 0 | 0 | 4 | 1 | 1 | 2 | hsa-miR-647 | -0.6  | N/A | Sites in UTR |
| CAMK2G    | NM_001204492 | calcium/calmodulin-dependent protein kinase II gamma                                                             | 2 | 1 | 1 | 0 | 0 | 0 | 0 | 0 | hsa-miR-647 | -0.59 | N/A | Sites in UTR |
| DNAH5     | NM_001369    | dynein, axonemal, heavy chain 5                                                                                  | 1 | 1 | 0 | 0 | 1 | 0 | 0 | 1 | hsa-miR-647 | -0.58 | N/A | Sites in UTR |
| KIRREL2   | NM_032123    | kin of IRRE like 2 (Drosophila)                                                                                  | 0 | 0 | 0 | 0 | 2 | 1 | 0 | 1 | hsa-miR-647 | -0.58 | N/A | Sites in UTR |
| ZFAND3    | NM_021943    | zinc finger, AN1-type domain 3                                                                                   | 0 | 0 | 0 | 0 | 4 | 0 | 4 | 0 | hsa-miR-647 | -0.58 | N/A | Sites in UTR |
| PSMF1     | NM_006814    | proteasome (prosome, macropain) inhibitor subunit 1 (PI31)                                                       | 0 | 0 | 0 | 0 | 1 | 1 | 0 | 0 | hsa-miR-647 | -0.58 | N/A | Sites in UTR |

|          |              |                                                                                       |   |   |   |   |   |   |   |   |             |       |     |              |
|----------|--------------|---------------------------------------------------------------------------------------|---|---|---|---|---|---|---|---|-------------|-------|-----|--------------|
| RHOJ     | NM_020663    | ras homolog gene family, member J                                                     | 0 | 0 | 0 | 0 | 2 | 1 | 0 | 1 | hsa-miR-647 | -0.58 | N/A | Sites in UTR |
| ABCC1    | NM_004996    | ATP-binding cassette, sub-family C (CFTR/MRP), member 1                               | 2 | 0 | 2 | 0 | 1 | 0 | 1 | 0 | hsa-miR-647 | -0.57 | N/A | Sites in UTR |
| C1orf183 | NM_019099    | chromosome 1 open reading frame 183                                                   | 0 | 0 | 0 | 0 | 5 | 0 | 4 | 1 | hsa-miR-647 | -0.57 | N/A | Sites in UTR |
| PRRX1    | NM_006902    | paired related homeobox 1                                                             | 1 | 1 | 0 | 0 | 1 | 0 | 0 | 1 | hsa-miR-647 | -0.57 | N/A | Sites in UTR |
| ENDOD1   | NM_015036    | endonuclease domain containing 1                                                      | 1 | 0 | 1 | 0 | 3 | 1 | 0 | 2 | hsa-miR-647 | -0.57 | N/A | Sites in UTR |
| ZBTB44   | NM_014155    | zinc finger and BTB domain containing 44                                              | 1 | 1 | 0 | 0 | 1 | 0 | 1 | 0 | hsa-miR-647 | -0.57 | N/A | Sites in UTR |
| C6orf89  | NM_152734    | chromosome 6 open reading frame 89                                                    | 0 | 0 | 0 | 0 | 3 | 1 | 2 | 0 | hsa-miR-647 | -0.57 | N/A | Sites in UTR |
| ST3GAL3  | NM_006279    | ST3 beta-galactoside alpha-2,3-sialyltransferase 3                                    | 0 | 0 | 0 | 0 | 3 | 0 | 3 | 0 | hsa-miR-647 | -0.56 | N/A | Sites in UTR |
| ENDOU    | NM_001172439 | endonuclease, polyU-specific                                                          | 0 | 0 | 0 | 0 | 2 | 0 | 2 | 0 | hsa-miR-647 | -0.56 | N/A | Sites in UTR |
| DENND5B  | NM_144973    | DENN/MADD domain containing 5B                                                        | 0 | 0 | 0 | 0 | 3 | 2 | 0 | 1 | hsa-miR-647 | -0.56 | N/A | Sites in UTR |
| RAPGEF5  | NM_012294    | Rap guanine nucleotide exchange factor (GEF) 5                                        | 0 | 0 | 0 | 0 | 4 | 1 | 1 | 2 | hsa-miR-647 | -0.55 | N/A | Sites in UTR |
| ERCC2    | NM_001130867 | excision repair cross-complementing rodent repair deficiency, complementation group 2 | 0 | 0 | 0 | 0 | 1 | 1 | 0 | 0 | hsa-miR-647 | -0.55 | N/A | Sites in UTR |
| NFIX     | NM_002501    | nuclear factor I/X (CCAAT-binding transcription factor)                               | 2 | 1 | 1 | 0 | 0 | 0 | 0 | 0 | hsa-miR-647 | -0.55 | N/A | Sites in UTR |
| TP73     | NM_001126240 | tumor protein p73                                                                     | 0 | 0 | 0 | 0 | 4 | 1 | 3 | 0 | hsa-miR-647 | -0.55 | N/A | Sites in UTR |
| NR6A1    | NM_001489    | nuclear receptor subfamily 6, group A, member 1                                       | 0 | 0 | 0 | 0 | 1 | 1 | 0 | 0 | hsa-miR-647 | -0.55 | N/A | Sites in UTR |
| ALCAM    | NM_001627    | activated leukocyte cell adhesion molecule                                            | 1 | 0 | 1 | 0 | 1 | 0 | 1 | 0 | hsa-miR-647 | -0.55 | N/A | Sites in UTR |
| GK       | NM_000167    | glycerol kinase                                                                       | 0 | 0 | 0 | 0 | 3 | 0 | 2 | 1 | hsa-miR-647 | -0.54 | N/A | Sites in UTR |
| F13A1    | NM_000129    | coagulation factor XIII, A1 polypeptide                                               | 0 | 0 | 0 | 0 | 2 | 1 | 1 | 0 | hsa-miR-647 | -0.54 | N/A | Sites in UTR |

|          |              |                                                       |   |   |   |   |   |   |   |   |             |       |     |              |
|----------|--------------|-------------------------------------------------------|---|---|---|---|---|---|---|---|-------------|-------|-----|--------------|
| MAGEB1   | NM_002363    | melanoma antigen family B, 1                          | 0 | 0 | 0 | 0 | 1 | 1 | 0 | 0 | hsa-miR-647 | -0.53 | N/A | Sites in UTR |
| MAP3K3   | NM_002401    | mitogen-activated protein kinase kinase kinase 3      | 1 | 0 | 1 | 0 | 1 | 0 | 1 | 0 | hsa-miR-647 | -0.53 | N/A | Sites in UTR |
| C9orf66  | NM_152569    | chromosome 9 open reading frame 66                    | 0 | 0 | 0 | 0 | 1 | 1 | 0 | 0 | hsa-miR-647 | -0.53 | N/A | Sites in UTR |
| FAM75D3  | NM_207416    | family with sequence similarity 75, member D3         | 0 | 0 | 0 | 0 | 2 | 1 | 0 | 1 | hsa-miR-647 | -0.53 | N/A | Sites in UTR |
| IL5      | NM_000879    | interleukin 5 (colony-stimulating factor, eosinophil) | 0 | 0 | 0 | 0 | 1 | 1 | 0 | 0 | hsa-miR-647 | -0.53 | N/A | Sites in UTR |
| KAZN     | NM_201628    | kazrin, periplakin interacting protein                | 0 | 0 | 0 | 0 | 2 | 1 | 1 | 0 | hsa-miR-647 | -0.53 | N/A | Sites in UTR |
| PLCL2    | NM_001144382 | phospholipase C-like 2                                | 0 | 0 | 0 | 0 | 1 | 1 | 0 | 0 | hsa-miR-647 | -0.53 | N/A | Sites in UTR |
| CA10     | NM_001082533 | carbonic anhydrase X                                  | 0 | 0 | 0 | 0 | 2 | 0 | 2 | 0 | hsa-miR-647 | -0.53 | N/A | Sites in UTR |
| C11orf34 | NM_001145024 | chromosome 11 open reading frame 34                   | 0 | 0 | 0 | 0 | 2 | 1 | 0 | 1 | hsa-miR-647 | -0.52 | N/A | Sites in UTR |
| GRIPAP1  | NM_020137    | GRIP1 associated protein 1                            | 1 | 1 | 0 | 0 | 0 | 0 | 0 | 0 | hsa-miR-647 | -0.52 | N/A | Sites in UTR |
| ULBP1    | NM_025218    | UL16 binding protein 1                                | 0 | 0 | 0 | 0 | 2 | 0 | 2 | 0 | hsa-miR-647 | -0.52 | N/A | Sites in UTR |
| PNPO     | NM_018129    | pyridoxamine 5'-phosphate oxidase                     | 0 | 0 | 0 | 0 | 2 | 1 | 1 | 0 | hsa-miR-647 | -0.52 | N/A | Sites in UTR |
| ZNF629   | NM_001080417 | zinc finger protein 629                               | 0 | 0 | 0 | 0 | 3 | 1 | 0 | 2 | hsa-miR-647 | -0.52 | N/A | Sites in UTR |
| RND3     | NM_005168    | Rho family GTPase 3                                   | 0 | 0 | 0 | 0 | 2 | 1 | 0 | 1 | hsa-miR-647 | -0.52 | N/A | Sites in UTR |
| AFF3     | NM_001025108 | AF4/FMR2 family, member 3                             | 1 | 1 | 0 | 0 | 1 | 0 | 0 | 1 | hsa-miR-647 | -0.52 | N/A | Sites in UTR |
| CREG2    | NM_153836    | cellular repressor of E1A-stimulated genes 2          | 0 | 0 | 0 | 0 | 2 | 0 | 2 | 0 | hsa-miR-647 | -0.52 | N/A | Sites in UTR |
| SYVN1    | NM_032431    | synovial apoptosis inhibitor 1, synoviolin            | 2 | 0 | 2 | 0 | 1 | 0 | 0 | 1 | hsa-miR-647 | -0.52 | N/A | Sites in UTR |
| C16orf82 | NM_001145545 | chromosome 16 open reading frame 82                   | 0 | 0 | 0 | 0 | 3 | 0 | 3 | 0 | hsa-miR-647 | -0.51 | N/A | Sites in UTR |

|          |              |                                                          |   |   |   |   |   |   |   |   |             |       |     |              |
|----------|--------------|----------------------------------------------------------|---|---|---|---|---|---|---|---|-------------|-------|-----|--------------|
| IGDCC3   | NM_004884    | immunoglobulin superfamily, DCC subclass, member 3       | 0 | 0 | 0 | 0 | 2 | 1 | 1 | 0 | hsa-miR-647 | -0.51 | N/A | Sites in UTR |
| SCRN3    | NM_001193528 | secernin 3                                               | 0 | 0 | 0 | 0 | 1 | 1 | 0 | 0 | hsa-miR-647 | -0.51 | N/A | Sites in UTR |
| FAM149B1 | NM_173348    | family with sequence similarity 149, member B1           | 0 | 0 | 0 | 0 | 1 | 1 | 0 | 0 | hsa-miR-647 | -0.5  | N/A | Sites in UTR |
| ARNT     | NM_001197325 | aryl hydrocarbon receptor nuclear translocator           | 1 | 1 | 0 | 0 | 1 | 0 | 0 | 1 | hsa-miR-647 | -0.5  | N/A | Sites in UTR |
| DCX      | NM_000555    | doublecortin                                             | 2 | 1 | 0 | 1 | 0 | 0 | 0 | 0 | hsa-miR-647 | -0.5  | N/A | Sites in UTR |
| UBE2L6   | NM_004223    | ubiquitin-conjugating enzyme E2L 6                       | 1 | 1 | 0 | 0 | 1 | 0 | 0 | 1 | hsa-miR-647 | -0.5  | N/A | Sites in UTR |
| CDHR1    | NM_033100    | cadherin-related family member 1                         | 0 | 0 | 0 | 0 | 2 | 1 | 0 | 1 | hsa-miR-647 | -0.5  | N/A | Sites in UTR |
| SETBP1   | NM_015559    | SET binding protein 1                                    | 0 | 0 | 0 | 0 | 3 | 1 | 2 | 0 | hsa-miR-647 | -0.5  | N/A | Sites in UTR |
| C2orf61  | NM_173649    | chromosome 2 open reading frame 61                       | 0 | 0 | 0 | 0 | 3 | 1 | 2 | 0 | hsa-miR-647 | -0.5  | N/A | Sites in UTR |
| MLEC     | NM_014730    | malectin                                                 | 0 | 0 | 0 | 0 | 4 | 1 | 2 | 1 | hsa-miR-647 | -0.5  | N/A | Sites in UTR |
| DDHD1    | NM_001160147 | DDHD domain containing 1                                 | 0 | 0 | 0 | 0 | 2 | 0 | 2 | 0 | hsa-miR-647 | -0.5  | N/A | Sites in UTR |
| SESN2    | NM_031459    | sestrin 2                                                | 1 | 1 | 0 | 0 | 1 | 0 | 1 | 0 | hsa-miR-647 | -0.5  | N/A | Sites in UTR |
| TPPP2    | NM_173846    | tubulin polymerization-promoting protein family member 2 | 0 | 0 | 0 | 0 | 1 | 1 | 0 | 0 | hsa-miR-647 | -0.5  | N/A | Sites in UTR |
| MRGPRF   | NM_001098515 | MAS-related GPR, member F                                | 0 | 0 | 0 | 0 | 2 | 0 | 2 | 0 | hsa-miR-647 | -0.5  | N/A | Sites in UTR |
| DNAJC27  | NM_001198559 | DnaJ (Hsp40) homolog, subfamily C, member 27             | 0 | 0 | 0 | 0 | 4 | 0 | 3 | 1 | hsa-miR-647 | -0.5  | N/A | Sites in UTR |
| EGF      | NM_001178130 | epidermal growth factor                                  | 0 | 0 | 0 | 0 | 1 | 1 | 0 | 0 | hsa-miR-647 | -0.49 | N/A | Sites in UTR |
| EXOC5    | NM_006544    | exocyst complex component 5                              | 1 | 0 | 1 | 0 | 1 | 0 | 0 | 1 | hsa-miR-647 | -0.49 | N/A | Sites in UTR |
| ZNF202   | NM_003455    | zinc finger protein 202                                  | 0 | 0 | 0 | 0 | 1 | 1 | 0 | 0 | hsa-miR-647 | -0.49 | N/A | Sites in UTR |

|          |              |                                                                                       |   |   |   |   |   |   |   |   |   |             |       |     |              |
|----------|--------------|---------------------------------------------------------------------------------------|---|---|---|---|---|---|---|---|---|-------------|-------|-----|--------------|
| PKDCC    | NM_138370    | protein kinase domain containing, cytoplasmic homolog (mouse)                         | 1 | 1 | 0 | 0 | 0 | 0 | 0 | 0 | 0 | hsa-miR-647 | -0.49 | N/A | Sites in UTR |
| DCUN1D3  | NM_173475    | DCN1, defective in cullin neddylation 1, domain containing 3 ( <i>S. cerevisiae</i> ) | 1 | 1 | 0 | 0 | 1 | 0 | 0 | 1 | 0 | hsa-miR-647 | -0.49 | N/A | Sites in UTR |
| SLC24A4  | NM_153646    | solute carrier family 24 (sodium/potassium/calcium exchanger), member 4               | 1 | 0 | 1 | 0 | 2 | 0 | 2 | 0 | 0 | hsa-miR-647 | -0.49 | N/A | Sites in UTR |
| PCGF6    | NM_001011663 | polycomb group ring finger 6                                                          | 0 | 0 | 0 | 0 | 1 | 1 | 0 | 0 | 0 | hsa-miR-647 | -0.49 | N/A | Sites in UTR |
| RHPN1    | NM_052924    | rhophilin, Rho GTPase binding protein 1                                               | 0 | 0 | 0 | 0 | 4 | 0 | 2 | 2 | 0 | hsa-miR-647 | -0.49 | N/A | Sites in UTR |
| DCK      | NM_000788    | deoxycytidine kinase                                                                  | 0 | 0 | 0 | 0 | 1 | 1 | 0 | 0 | 0 | hsa-miR-647 | -0.49 | N/A | Sites in UTR |
| TECRL    | NM_001010874 | trans-2,3-enoyl-CoA reductase-like                                                    | 0 | 0 | 0 | 0 | 2 | 0 | 2 | 0 | 0 | hsa-miR-647 | -0.49 | N/A | Sites in UTR |
| TMEM91   | NM_001042595 | transmembrane protein 91                                                              | 1 | 1 | 0 | 0 | 0 | 0 | 0 | 0 | 0 | hsa-miR-647 | -0.48 | N/A | Sites in UTR |
| HCFC1    | NM_005334    | host cell factor C1 (VP16-accessory protein)                                          | 0 | 0 | 0 | 0 | 2 | 1 | 1 | 0 | 0 | hsa-miR-647 | -0.48 | N/A | Sites in UTR |
| C1orf122 | NM_001142726 | chromosome 1 open reading frame 122                                                   | 0 | 0 | 0 | 0 | 1 | 1 | 0 | 0 | 0 | hsa-miR-647 | -0.48 | N/A | Sites in UTR |
| KIAA1143 | NM_020696    | KIAA1143                                                                              | 0 | 0 | 0 | 0 | 2 | 1 | 1 | 0 | 0 | hsa-miR-647 | -0.48 | N/A | Sites in UTR |
| PPM1F    | NM_014634    | protein phosphatase, Mg2+/Mn2+ dependent, 1F                                          | 0 | 0 | 0 | 0 | 3 | 1 | 2 | 0 | 0 | hsa-miR-647 | -0.48 | N/A | Sites in UTR |
| SYT6     | NM_205848    | synaptotagmin VI                                                                      | 0 | 0 | 0 | 0 | 1 | 1 | 0 | 0 | 0 | hsa-miR-647 | -0.48 | N/A | Sites in UTR |
| C19orf24 | NM_017914    | chromosome 19 open reading frame 24                                                   | 0 | 0 | 0 | 0 | 2 | 0 | 2 | 0 | 0 | hsa-miR-647 | -0.48 | N/A | Sites in UTR |
| MYCT1    | NM_025107    | myc target 1                                                                          | 0 | 0 | 0 | 0 | 1 | 1 | 0 | 0 | 0 | hsa-miR-647 | -0.48 | N/A | Sites in UTR |
| MLIP     | NM_138569    | muscular LMNA-interacting protein                                                     | 1 | 1 | 0 | 0 | 0 | 0 | 0 | 0 | 0 | hsa-miR-647 | -0.48 | N/A | Sites in UTR |
| FOXJ2    | NM_018416    | forkhead box J2                                                                       | 1 | 0 | 1 | 0 | 1 | 1 | 0 | 0 | 0 | hsa-miR-647 | -0.48 | N/A | Sites in UTR |
| GSDMB    | NM_001042471 | gasdermin B                                                                           | 0 | 0 | 0 | 0 | 1 | 1 | 0 | 0 | 0 | hsa-miR-647 | -0.48 | N/A | Sites in UTR |

|          |              |                                                                                   |   |   |   |   |   |   |   |   |   |             |       |     |              |
|----------|--------------|-----------------------------------------------------------------------------------|---|---|---|---|---|---|---|---|---|-------------|-------|-----|--------------|
| RAB1A    | NM_004161    | RAB1A, member RAS oncogene family                                                 | 1 | 1 | 0 | 0 | 0 | 0 | 0 | 0 | 0 | hsa-miR-647 | -0.48 | N/A | Sites in UTR |
| FN1      | NM_002026    | fibronectin 1                                                                     | 0 | 0 | 0 | 0 | 1 | 1 | 0 | 0 | 0 | hsa-miR-647 | -0.47 | N/A | Sites in UTR |
| L2HGDH   | NM_024884    | L-2-hydroxyglutarate dehydrogenase                                                | 1 | 1 | 0 | 0 | 1 | 0 | 1 | 0 | 0 | hsa-miR-647 | -0.47 | N/A | Sites in UTR |
| EPB41L4A | NM_022140    | erythrocyte membrane protein band 4.1 like 4A                                     | 0 | 0 | 0 | 0 | 1 | 1 | 0 | 0 | 0 | hsa-miR-647 | -0.47 | N/A | Sites in UTR |
| C5orf46  | NM_206966    | chromosome 5 open reading frame 46                                                | 0 | 0 | 0 | 0 | 1 | 1 | 0 | 0 | 0 | hsa-miR-647 | -0.47 | N/A | Sites in UTR |
| HSF5     | NM_001080439 | heat shock transcription factor family member 5                                   | 0 | 0 | 0 | 0 | 2 | 0 | 2 | 0 | 0 | hsa-miR-647 | -0.47 | N/A | Sites in UTR |
| LCP1     | NM_002298    | lymphocyte cytosolic protein 1 (L-plastin)                                        | 0 | 0 | 0 | 0 | 1 | 1 | 0 | 0 | 0 | hsa-miR-647 | -0.47 | N/A | Sites in UTR |
| TRAF2    | NM_021138    | TNF receptor-associated factor 2                                                  | 0 | 0 | 0 | 0 | 2 | 1 | 1 | 0 | 0 | hsa-miR-647 | -0.47 | N/A | Sites in UTR |
| C1orf127 | NM_001170754 | chromosome 1 open reading frame 127                                               | 1 | 1 | 0 | 0 | 0 | 0 | 0 | 0 | 0 | hsa-miR-647 | -0.47 | N/A | Sites in UTR |
| MOSPD2   | NM_001177475 | motile sperm domain containing 2                                                  | 1 | 1 | 0 | 0 | 0 | 0 | 0 | 0 | 0 | hsa-miR-647 | -0.47 | N/A | Sites in UTR |
| GTDC1    | NM_001006636 | glycosyltransferase-like domain containing 1                                      | 2 | 1 | 1 | 0 | 0 | 0 | 0 | 0 | 0 | hsa-miR-647 | -0.47 | N/A | Sites in UTR |
| DNALI1   | NM_003462    | dynein, axonemal, light intermediate chain 1                                      | 0 | 0 | 0 | 0 | 1 | 1 | 0 | 0 | 0 | hsa-miR-647 | -0.47 | N/A | Sites in UTR |
| CD3D     | NM_000732    | CD3d molecule, delta (CD3-TCR complex)                                            | 0 | 0 | 0 | 0 | 2 | 0 | 1 | 1 | 1 | hsa-miR-647 | -0.47 | N/A | Sites in UTR |
| SRF      | NM_003131    | serum response factor (c-fos serum response element-binding transcription factor) | 2 | 0 | 1 | 1 | 1 | 1 | 0 | 0 | 0 | hsa-miR-647 | -0.47 | N/A | Sites in UTR |
| HELZ     | NM_014877    | helicase with zinc finger                                                         | 0 | 0 | 0 | 0 | 1 | 1 | 0 | 0 | 0 | hsa-miR-647 | -0.47 | N/A | Sites in UTR |
| IFIT2    | NM_001547    | interferon-induced protein with tetratricopeptide repeats 2                       | 0 | 0 | 0 | 0 | 1 | 1 | 0 | 0 | 0 | hsa-miR-647 | -0.47 | N/A | Sites in UTR |
| PSMD13   | NM_002817    | proteasome (prosome, macropain) 26S subunit, non-ATPase, 13                       | 0 | 0 | 0 | 0 | 1 | 1 | 0 | 0 | 0 | hsa-miR-647 | -0.47 | N/A | Sites in UTR |
| SAE1     | NM_001145713 | SUMO1 activating enzyme subunit 1                                                 | 0 | 0 | 0 | 0 | 1 | 1 | 0 | 0 | 0 | hsa-miR-647 | -0.47 | N/A | Sites in UTR |

|              |              |                                                                            |   |   |   |   |   |   |   |   |             |       |     |              |
|--------------|--------------|----------------------------------------------------------------------------|---|---|---|---|---|---|---|---|-------------|-------|-----|--------------|
| LOC100130357 | NM_001242698 | hypothetical LOC100130357                                                  | 0 | 0 | 0 | 0 | 1 | 1 | 0 | 0 | hsa-miR-647 | -0.46 | N/A | Sites in UTR |
| STIL         | NM_001048166 | SCL/TAL1 interrupting locus                                                | 0 | 0 | 0 | 0 | 1 | 1 | 0 | 0 | hsa-miR-647 | -0.46 | N/A | Sites in UTR |
| ZNF19        | NM_006961    | zinc finger protein 19                                                     | 0 | 0 | 0 | 0 | 1 | 1 | 0 | 0 | hsa-miR-647 | -0.46 | N/A | Sites in UTR |
| ZNF521       | NM_015461    | zinc finger protein 521                                                    | 0 | 0 | 0 | 0 | 1 | 1 | 0 | 0 | hsa-miR-647 | -0.46 | N/A | Sites in UTR |
| ALOXE3       | NM_001165960 | arachidonate lipoxygenase 3                                                | 0 | 0 | 0 | 0 | 1 | 1 | 0 | 0 | hsa-miR-647 | -0.46 | N/A | Sites in UTR |
| TCEB1        | NM_001204857 | transcription elongation factor B (SIII), polypeptide 1 (15kDa, elongin C) | 0 | 0 | 0 | 0 | 1 | 1 | 0 | 0 | hsa-miR-647 | -0.46 | N/A | Sites in UTR |
| DKK2         | NM_014421    | dickkopf homolog 2 (Xenopus laevis)                                        | 0 | 0 | 0 | 0 | 2 | 0 | 2 | 0 | hsa-miR-647 | -0.46 | N/A | Sites in UTR |
| TMEM159      | NM_020422    | transmembrane protein 159                                                  | 0 | 0 | 0 | 0 | 1 | 1 | 0 | 0 | hsa-miR-647 | -0.46 | N/A | Sites in UTR |
| C17orf65     | NM_178542    | chromosome 17 open reading frame 65                                        | 0 | 0 | 0 | 0 | 1 | 1 | 0 | 0 | hsa-miR-647 | -0.46 | N/A | Sites in UTR |
| MLL2         | NM_003482    | myeloid/lymphoid or mixed-lineage leukemia 2                               | 2 | 0 | 2 | 0 | 0 | 0 | 0 | 0 | hsa-miR-647 | -0.46 | N/A | Sites in UTR |
| GABRB2       | NM_000813    | gamma-aminobutyric acid (GABA) A receptor, beta 2                          | 1 | 0 | 1 | 0 | 1 | 0 | 1 | 0 | hsa-miR-647 | -0.46 | N/A | Sites in UTR |
| GJB7         | NM_198568    | gap junction protein, beta 7, 25kDa                                        | 0 | 0 | 0 | 0 | 2 | 1 | 1 | 0 | hsa-miR-647 | -0.45 | N/A | Sites in UTR |
| TUBB6        | NM_032525    | tubulin, beta 6                                                            | 0 | 0 | 0 | 0 | 1 | 1 | 0 | 0 | hsa-miR-647 | -0.45 | N/A | Sites in UTR |
| YIPF5        | NM_001024947 | Yip1 domain family, member 5                                               | 0 | 0 | 0 | 0 | 2 | 0 | 1 | 1 | hsa-miR-647 | -0.45 | N/A | Sites in UTR |
| TNFAIP2      | NM_006291    | tumor necrosis factor, alpha-induced protein 2                             | 0 | 0 | 0 | 0 | 2 | 1 | 1 | 0 | hsa-miR-647 | -0.45 | N/A | Sites in UTR |
| PTPRB        | NM_001109754 | protein tyrosine phosphatase, receptor type, B                             | 1 | 1 | 0 | 0 | 1 | 0 | 1 | 0 | hsa-miR-647 | -0.45 | N/A | Sites in UTR |
| RNF165       | NM_152470    | ring finger protein 165                                                    | 1 | 1 | 0 | 0 | 0 | 0 | 0 | 0 | hsa-miR-647 | -0.45 | N/A | Sites in UTR |
| THAP6        | NM_144721    | THAP domain containing 6                                                   | 1 | 1 | 0 | 0 | 1 | 0 | 0 | 1 | hsa-miR-647 | -0.45 | N/A | Sites in UTR |



|          |              |                                              |   |   |   |   |   |   |   |   |             |       |     |              |
|----------|--------------|----------------------------------------------|---|---|---|---|---|---|---|---|-------------|-------|-----|--------------|
| CYTH4    | NM_013385    | cytohesin 4                                  | 0 | 0 | 0 | 0 | 3 | 0 | 3 | 0 | hsa-miR-647 | -0.45 | N/A | Sites in UTR |
| PITPNM3  | NM_001165966 | PITPNM family member 3                       | 2 | 0 | 1 | 1 | 2 | 0 | 2 | 0 | hsa-miR-647 | -0.45 | N/A | Sites in UTR |
| PAK6     | NM_001128628 | p21 protein (Cdc42/Rac)-activated kinase 6   | 0 | 0 | 0 | 0 | 2 | 1 | 1 | 0 | hsa-miR-647 | -0.45 | N/A | Sites in UTR |
| 3-Sep    | NM_019106    | septin 3                                     | 0 | 0 | 0 | 0 | 3 | 1 | 1 | 1 | hsa-miR-647 | -0.45 | N/A | Sites in UTR |
| ABHD6    | NM_020676    | abhydrolase domain containing 6              | 0 | 0 | 0 | 0 | 2 | 0 | 2 | 0 | hsa-miR-647 | -0.45 | N/A | Sites in UTR |
| FGFBP3   | NM_152429    | fibroblast growth factor binding protein 3   | 0 | 0 | 0 | 0 | 2 | 0 | 2 | 0 | hsa-miR-647 | -0.45 | N/A | Sites in UTR |
| HPCA     | NM_002143    | hippocalcin                                  | 0 | 0 | 0 | 0 | 1 | 1 | 0 | 0 | hsa-miR-647 | -0.45 | N/A | Sites in UTR |
| YIPF3    | NM_015388    | Yip1 domain family, member 3                 | 0 | 0 | 0 | 0 | 1 | 1 | 0 | 0 | hsa-miR-647 | -0.45 | N/A | Sites in UTR |
| C19orf63 | NM_175063    | chromosome 19 open reading frame 63          | 0 | 0 | 0 | 0 | 1 | 1 | 0 | 0 | hsa-miR-647 | -0.44 | N/A | Sites in UTR |
| APLF     | NM_173545    | aprataxin and PNKP like factor               | 0 | 0 | 0 | 0 | 2 | 0 | 1 | 1 | hsa-miR-647 | -0.44 | N/A | Sites in UTR |
| TRPS1    | NM_014112    | trichorhinophalangeal syndrome 1             | 0 | 0 | 0 | 0 | 2 | 1 | 0 | 1 | hsa-miR-647 | -0.44 | N/A | Sites in UTR |
| PTAFR    | NM_000952    | platelet-activating factor receptor          | 0 | 0 | 0 | 0 | 2 | 1 | 1 | 0 | hsa-miR-647 | -0.44 | N/A | Sites in UTR |
| ODF2L    | NM_001007022 | outer dense fiber of sperm tails 2-like      | 0 | 0 | 0 | 0 | 2 | 0 | 1 | 1 | hsa-miR-647 | -0.44 | N/A | Sites in UTR |
| FBXO17   | NM_024907    | F-box protein 17                             | 0 | 0 | 0 | 0 | 2 | 0 | 2 | 0 | hsa-miR-647 | -0.44 | N/A | Sites in UTR |
| ORMDL3   | NM_139280    | ORM1-like 3 ( <i>S. cerevisiae</i> )         | 0 | 0 | 0 | 0 | 2 | 1 | 1 | 0 | hsa-miR-647 | -0.44 | N/A | Sites in UTR |
| ARID1A   | NM_006015    | AT rich interactive domain 1A (SWI-like)     | 1 | 1 | 0 | 0 | 0 | 0 | 0 | 0 | hsa-miR-647 | -0.44 | N/A | Sites in UTR |
| TRAK2    | NM_015049    | trafficking protein, kinesin binding 2       | 1 | 1 | 0 | 0 | 1 | 0 | 1 | 0 | hsa-miR-647 | -0.44 | N/A | Sites in UTR |
| SCN2B    | NM_004588    | sodium channel, voltage-gated, type II, beta | 0 | 0 | 0 | 0 | 4 | 1 | 3 | 0 | hsa-miR-647 | -0.44 | N/A | Sites in UTR |

|           |              |                                                         |   |   |   |   |   |   |   |   |   |             |       |     |              |
|-----------|--------------|---------------------------------------------------------|---|---|---|---|---|---|---|---|---|-------------|-------|-----|--------------|
| RNF208    | NM_031297    | ring finger protein 208                                 | 1 | 1 | 0 | 0 | 0 | 0 | 0 | 0 | 0 | hsa-miR-647 | -0.44 | N/A | Sites in UTR |
| ZNF652    | NM_001145365 | zinc finger protein 652                                 | 0 | 0 | 0 | 0 | 2 | 0 | 1 | 1 | 1 | hsa-miR-647 | -0.44 | N/A | Sites in UTR |
| HNRNPF    | NM_001098204 | heterogeneous nuclear ribonucleoprotein F               | 1 | 1 | 0 | 0 | 0 | 0 | 0 | 0 | 0 | hsa-miR-647 | -0.44 | N/A | Sites in UTR |
| LOC388630 | NM_001194986 | UPF0632 protein A                                       | 2 | 2 | 0 | 0 | 2 | 0 | 1 | 1 | 1 | hsa-miR-647 | -0.44 | N/A | Sites in UTR |
| SCN8A     | NM_001177984 | sodium channel, voltage gated, type VIII, alpha subunit | 1 | 1 | 0 | 0 | 0 | 0 | 0 | 0 | 0 | hsa-miR-647 | -0.44 | N/A | Sites in UTR |
| C19orf59  | NM_174918    | chromosome 19 open reading frame 59                     | 0 | 0 | 0 | 0 | 1 | 1 | 0 | 0 | 0 | hsa-miR-647 | -0.44 | N/A | Sites in UTR |
| DAPK3     | NM_001348    | death-associated protein kinase 3                       | 0 | 0 | 0 | 0 | 1 | 1 | 0 | 0 | 0 | hsa-miR-647 | -0.43 | N/A | Sites in UTR |
| CLVS1     | NM_173519    | clavesin 1                                              | 1 | 1 | 0 | 0 | 0 | 0 | 0 | 0 | 0 | hsa-miR-647 | -0.43 | N/A | Sites in UTR |
| ZNF195    | NM_001130519 | zinc finger protein 195                                 | 0 | 0 | 0 | 0 | 1 | 1 | 0 | 0 | 0 | hsa-miR-647 | -0.43 | N/A | Sites in UTR |
| ZNF480    | NM_144684    | zinc finger protein 480                                 | 0 | 0 | 0 | 0 | 3 | 0 | 1 | 2 | 2 | hsa-miR-647 | -0.43 | N/A | Sites in UTR |
| FOXP3     | NM_001114377 | forkhead box P3                                         | 0 | 0 | 0 | 0 | 2 | 1 | 1 | 0 | 0 | hsa-miR-647 | -0.43 | N/A | Sites in UTR |
| GINS2     | NM_016095    | GINS complex subunit 2 (Psf2 homolog)                   | 0 | 0 | 0 | 0 | 1 | 1 | 0 | 0 | 0 | hsa-miR-647 | -0.43 | N/A | Sites in UTR |
| CHRAC1    | NM_017444    | chromatin accessibility complex 1                       | 0 | 0 | 0 | 0 | 2 | 0 | 2 | 0 | 0 | hsa-miR-647 | -0.43 | N/A | Sites in UTR |
| CRHR2     | NM_001202475 | corticotropin releasing hormone receptor 2              | 0 | 0 | 0 | 0 | 2 | 1 | 1 | 0 | 0 | hsa-miR-647 | -0.43 | N/A | Sites in UTR |
| C1orf159  | NM_017891    | chromosome 1 open reading frame 159                     | 0 | 0 | 0 | 0 | 2 | 1 | 1 | 0 | 0 | hsa-miR-647 | -0.43 | N/A | Sites in UTR |
| NEBL      | NM_001173484 | nebulette                                               | 0 | 0 | 0 | 0 | 1 | 1 | 0 | 0 | 0 | hsa-miR-647 | -0.43 | N/A | Sites in UTR |
| XAF1      | NM_017523    | XIAP associated factor 1                                | 0 | 0 | 0 | 0 | 2 | 0 | 1 | 1 | 1 | hsa-miR-647 | -0.43 | N/A | Sites in UTR |
| ZFX4      | NM_024721    | zinc finger homeobox 4                                  | 1 | 1 | 0 | 0 | 0 | 0 | 0 | 0 | 0 | hsa-miR-647 | -0.43 | N/A | Sites in UTR |

|          |              |                                                              |   |   |   |   |   |   |   |   |             |       |     |              |
|----------|--------------|--------------------------------------------------------------|---|---|---|---|---|---|---|---|-------------|-------|-----|--------------|
| BEND6    | NM_152731    | BEN domain containing 6                                      | 0 | 0 | 0 | 0 | 1 | 1 | 0 | 0 | hsa-miR-647 | -0.43 | N/A | Sites in UTR |
| TXNL4B   | NM_001142317 | thioredoxin-like 4B                                          | 0 | 0 | 0 | 0 | 1 | 1 | 0 | 0 | hsa-miR-647 | -0.43 | N/A | Sites in UTR |
| UPF3B    | NM_023010    | UPF3 regulator of nonsense transcripts homolog B (yeast)     | 1 | 1 | 0 | 0 | 0 | 0 | 0 | 0 | hsa-miR-647 | -0.43 | N/A | Sites in UTR |
| GDNF     | NM_000514    | glial cell derived neurotrophic factor                       | 0 | 0 | 0 | 0 | 2 | 1 | 1 | 0 | hsa-miR-647 | -0.43 | N/A | Sites in UTR |
| SORL1    | NM_003105    | sortilin-related receptor, L(DLR class) A repeats containing | 1 | 0 | 1 | 0 | 2 | 0 | 0 | 2 | hsa-miR-647 | -0.42 | N/A | Sites in UTR |
| PLAG1    | NM_001114634 | pleiomorphic adenoma gene 1                                  | 0 | 0 | 0 | 0 | 3 | 0 | 3 | 0 | hsa-miR-647 | -0.42 | N/A | Sites in UTR |
| NETO2    | NM_001201477 | neuropilin (NRP) and tolloid (TLL)-like 2                    | 0 | 0 | 0 | 0 | 1 | 1 | 0 | 0 | hsa-miR-647 | -0.42 | N/A | Sites in UTR |
| ORAI3    | NM_152288    | ORAI calcium release-activated calcium modulator 3           | 0 | 0 | 0 | 0 | 1 | 1 | 0 | 0 | hsa-miR-647 | -0.42 | N/A | Sites in UTR |
| CNOT2    | NM_001199302 | CCR4-NOT transcription complex, subunit 2                    | 1 | 1 | 0 | 0 | 0 | 0 | 0 | 0 | hsa-miR-647 | -0.42 | N/A | Sites in UTR |
| ISM1     | NM_080826    | isthmin 1 homolog (zebrafish)                                | 0 | 0 | 0 | 0 | 1 | 1 | 0 | 0 | hsa-miR-647 | -0.42 | N/A | Sites in UTR |
| SCNN1B   | NM_000336    | sodium channel, nonvoltage-gated 1, beta                     | 0 | 0 | 0 | 0 | 1 | 1 | 0 | 0 | hsa-miR-647 | -0.42 | N/A | Sites in UTR |
| ZFP41    | NM_173832    | zinc finger protein 41 homolog (mouse)                       | 0 | 0 | 0 | 0 | 4 | 0 | 1 | 3 | hsa-miR-647 | -0.42 | N/A | Sites in UTR |
| PHYH     | NM_001037537 | phytanoyl-CoA 2-hydroxylase                                  | 0 | 0 | 0 | 0 | 1 | 1 | 0 | 0 | hsa-miR-647 | -0.42 | N/A | Sites in UTR |
| FAM75D4  | NM_001145197 | family with sequence similarity 75, member D4                | 0 | 0 | 0 | 0 | 1 | 1 | 0 | 0 | hsa-miR-647 | -0.42 | N/A | Sites in UTR |
| PRRC2C   | NM_015172    | proline-rich coiled-coil 2C                                  | 0 | 0 | 0 | 0 | 1 | 1 | 0 | 0 | hsa-miR-647 | -0.42 | N/A | Sites in UTR |
| C6orf136 | NM_001109938 | chromosome 6 open reading frame 136                          | 0 | 0 | 0 | 0 | 1 | 1 | 0 | 0 | hsa-miR-647 | -0.42 | N/A | Sites in UTR |
| LAIR1    | NM_002287    | leukocyte-associated immunoglobulin-like receptor 1          | 0 | 0 | 0 | 0 | 2 | 0 | 1 | 1 | hsa-miR-647 | -0.42 | N/A | Sites in UTR |
| MOCS1    | NM_001075098 | molybdenum cofactor synthesis 1                              | 1 | 1 | 0 | 0 | 1 | 0 | 0 | 1 | hsa-miR-647 | -0.42 | N/A | Sites in UTR |

|         |              |                                                                                             |   |   |   |   |   |   |   |   |             |       |     |              |
|---------|--------------|---------------------------------------------------------------------------------------------|---|---|---|---|---|---|---|---|-------------|-------|-----|--------------|
| DAB2    | NM_001343    | disabled homolog 2, mitogen-responsive phosphoprotein ( <i>Drosophila</i> )                 | 0 | 0 | 0 | 0 | 2 | 0 | 2 | 0 | hsa-miR-647 | -0.42 | N/A | Sites in UTR |
| SLC25A4 | NM_001151    | solute carrier family 25 (mitochondrial carrier; adenine nucleotide translocator), member 4 | 0 | 0 | 0 | 0 | 1 | 1 | 0 | 0 | hsa-miR-647 | -0.42 | N/A | Sites in UTR |
| MKRN2   | NM_014160    | makorin ring finger protein 2                                                               | 0 | 0 | 0 | 0 | 1 | 1 | 0 | 0 | hsa-miR-647 | -0.42 | N/A | Sites in UTR |
| GRIA2   | NM_000826    | glutamate receptor, ionotropic, AMPA 2                                                      | 0 | 0 | 0 | 0 | 2 | 0 | 1 | 1 | hsa-miR-647 | -0.42 | N/A | Sites in UTR |
| PTPN18  | NM_001142370 | protein tyrosine phosphatase, non-receptor type 18 (brain-derived)                          | 0 | 0 | 0 | 0 | 4 | 0 | 1 | 3 | hsa-miR-647 | -0.42 | N/A | Sites in UTR |
| ADAT1   | NM_012091    | adenosine deaminase, tRNA-specific 1                                                        | 0 | 0 | 0 | 0 | 2 | 1 | 0 | 1 | hsa-miR-647 | -0.41 | N/A | Sites in UTR |
| GGCX    | NM_000821    | gamma-glutamyl carboxylase                                                                  | 2 | 0 | 1 | 1 | 2 | 0 | 1 | 1 | hsa-miR-647 | -0.41 | N/A | Sites in UTR |
| GPN1    | NM_001145047 | GPN-loop GTPase 1                                                                           | 0 | 0 | 0 | 0 | 1 | 1 | 0 | 0 | hsa-miR-647 | -0.41 | N/A | Sites in UTR |
| EFEMP1  | NM_001039348 | EGF containing fibulin-like extracellular matrix protein 1                                  | 1 | 0 | 0 | 1 | 1 | 0 | 1 | 0 | hsa-miR-647 | -0.41 | N/A | Sites in UTR |
| PDE8A   | NM_002605    | phosphodiesterase 8A                                                                        | 0 | 0 | 0 | 0 | 2 | 0 | 2 | 0 | hsa-miR-647 | -0.41 | N/A | Sites in UTR |
| SLC23A2 | NM_005116    | solute carrier family 23 (nucleobase transporters), member 2                                | 0 | 0 | 0 | 0 | 2 | 1 | 1 | 0 | hsa-miR-647 | -0.41 | N/A | Sites in UTR |
| HNF1A   | NM_000545    | HNF1 homeobox A                                                                             | 0 | 0 | 0 | 0 | 3 | 0 | 3 | 0 | hsa-miR-647 | -0.41 | N/A | Sites in UTR |
| CCDC80  | NM_199511    | coiled-coil domain containing 80                                                            | 0 | 0 | 0 | 0 | 1 | 1 | 0 | 0 | hsa-miR-647 | -0.41 | N/A | Sites in UTR |
| PLD1    | NM_001130081 | phospholipase D1, phosphatidylcholine-specific                                              | 0 | 0 | 0 | 0 | 1 | 1 | 0 | 0 | hsa-miR-647 | -0.41 | N/A | Sites in UTR |
| CDH20   | NM_031891    | cadherin 20, type 2                                                                         | 0 | 0 | 0 | 0 | 1 | 1 | 0 | 0 | hsa-miR-647 | -0.41 | N/A | Sites in UTR |
| SYNJ2   | NM_001178088 | synaptojanin 2                                                                              | 0 | 0 | 0 | 0 | 1 | 1 | 0 | 0 | hsa-miR-647 | -0.41 | N/A | Sites in UTR |
| CHST3   | NM_004273    | carbohydrate (chondroitin 6) sulfotransferase 3                                             | 0 | 0 | 0 | 0 | 4 | 1 | 2 | 1 | hsa-miR-647 | -0.41 | N/A | Sites in UTR |
| SSCS5D  | NM_001195267 | scavenger receptor cysteine rich domain containing (5 domains)                              | 0 | 0 | 0 | 0 | 1 | 1 | 0 | 0 | hsa-miR-647 | -0.41 | N/A | Sites in UTR |

|           |              |                                                           |   |   |   |   |   |   |   |   |             |       |     |              |
|-----------|--------------|-----------------------------------------------------------|---|---|---|---|---|---|---|---|-------------|-------|-----|--------------|
| SURF4     | NM_033161    | surfeit 4                                                 | 1 | 1 | 0 | 0 | 1 | 0 | 0 | 1 | hsa-miR-647 | -0.41 | N/A | Sites in UTR |
| CHST6     | NM_021615    | carbohydrate (N-acetylglucosamine 6-O) sulfotransferase 6 | 0 | 0 | 0 | 0 | 2 | 1 | 1 | 0 | hsa-miR-647 | -0.41 | N/A | Sites in UTR |
| RNFT2     | NM_001109903 | ring finger protein, transmembrane 2                      | 0 | 0 | 0 | 0 | 2 | 0 | 1 | 1 | hsa-miR-647 | -0.41 | N/A | Sites in UTR |
| AP3M1     | NM_012095    | adaptor-related protein complex 3, mu 1 subunit           | 1 | 1 | 0 | 0 | 0 | 0 | 0 | 0 | hsa-miR-647 | -0.41 | N/A | Sites in UTR |
| ABCC9     | NM_020297    | ATP-binding cassette, sub-family C (CFTR/MRP), member 9   | 0 | 0 | 0 | 0 | 2 | 1 | 0 | 1 | hsa-miR-647 | -0.41 | N/A | Sites in UTR |
| TTN       | NM_003319    | titin                                                     | 0 | 0 | 0 | 0 | 1 | 1 | 0 | 0 | hsa-miR-647 | -0.4  | N/A | Sites in UTR |
| CLEC7A    | NM_022570    | C-type lectin domain family 7, member A                   | 0 | 0 | 0 | 0 | 1 | 1 | 0 | 0 | hsa-miR-647 | -0.4  | N/A | Sites in UTR |
| CXorf1    | NM_004709    | chromosome X open reading frame 1                         | 0 | 0 | 0 | 0 | 1 | 1 | 0 | 0 | hsa-miR-647 | -0.4  | N/A | Sites in UTR |
| CRIP1     | NM_014171    | cysteine-rich PDZ-binding protein                         | 0 | 0 | 0 | 0 | 1 | 1 | 0 | 0 | hsa-miR-647 | -0.4  | N/A | Sites in UTR |
| SNX15     | NM_013306    | sorting nexin 15                                          | 0 | 0 | 0 | 0 | 1 | 1 | 0 | 0 | hsa-miR-647 | -0.4  | N/A | Sites in UTR |
| PLA2G4E   | NM_001206670 | phospholipase A2, group IVE                               | 0 | 0 | 0 | 0 | 2 | 0 | 2 | 0 | hsa-miR-647 | -0.4  | N/A | Sites in UTR |
| EFNA5     | NM_001962    | ephrin-A5                                                 | 0 | 0 | 0 | 0 | 3 | 0 | 3 | 0 | hsa-miR-647 | -0.4  | N/A | Sites in UTR |
| CRTC1     | NM_001098482 | CREB regulated transcription coactivator 1                | 0 | 0 | 0 | 0 | 3 | 2 | 1 | 0 | hsa-miR-647 | -0.4  | N/A | Sites in UTR |
| TRIM52    | NM_032765    | tripartite motif containing 52                            | 1 | 1 | 0 | 0 | 0 | 0 | 0 | 0 | hsa-miR-647 | -0.4  | N/A | Sites in UTR |
| LOC253044 | NM_001242772 | hypothetical protein LOC253044                            | 0 | 0 | 0 | 0 | 2 | 0 | 2 | 0 | hsa-miR-647 | -0.4  | N/A | Sites in UTR |
| CERS6     | NM_203463    | ceramide synthase 6                                       | 0 | 0 | 0 | 0 | 3 | 0 | 1 | 2 | hsa-miR-647 | -0.4  | N/A | Sites in UTR |
| EAF1      | NM_033083    | ELL associated factor 1                                   | 1 | 0 | 0 | 1 | 2 | 0 | 1 | 1 | hsa-miR-647 | -0.4  | N/A | Sites in UTR |
| PPP1R14D  | NM_001130143 | protein phosphatase 1, regulatory (inhibitor) subunit 14D | 1 | 1 | 0 | 0 | 0 | 0 | 0 | 0 | hsa-miR-647 | -0.4  | N/A | Sites in UTR |

|          |              |                                                        |   |   |   |   |   |   |   |   |             |       |     |              |
|----------|--------------|--------------------------------------------------------|---|---|---|---|---|---|---|---|-------------|-------|-----|--------------|
| BARHL2   | NM_020063    | BarH-like homeobox 2                                   | 0 | 0 | 0 | 0 | 1 | 1 | 0 | 0 | hsa-miR-647 | -0.4  | N/A | Sites in UTR |
| MC2R     | NM_000529    | melanocortin 2 receptor (adrenocorticotrophic hormone) | 0 | 0 | 0 | 0 | 2 | 1 | 0 | 1 | hsa-miR-647 | -0.4  | N/A | Sites in UTR |
| PXDN     | NM_012293    | peroxidasin homolog (Drosophila)                       | 0 | 0 | 0 | 0 | 2 | 0 | 1 | 1 | hsa-miR-647 | -0.4  | N/A | Sites in UTR |
| BMP8B    | NM_001720    | bone morphogenetic protein 8b                          | 0 | 0 | 0 | 0 | 3 | 0 | 2 | 1 | hsa-miR-647 | -0.4  | N/A | Sites in UTR |
| PTPRT    | NM_007050    | protein tyrosine phosphatase, receptor type, T         | 0 | 0 | 0 | 0 | 5 | 0 | 3 | 2 | hsa-miR-647 | -0.4  | N/A | Sites in UTR |
| CERS5    | NM_147190    | ceramide synthase 5                                    | 1 | 1 | 0 | 0 | 0 | 0 | 0 | 0 | hsa-miR-647 | -0.4  | N/A | Sites in UTR |
| ZBTB41   | NM_194314    | zinc finger and BTB domain containing 41               | 0 | 0 | 0 | 0 | 1 | 1 | 0 | 0 | hsa-miR-647 | -0.4  | N/A | Sites in UTR |
| C6orf106 | NM_022758    | chromosome 6 open reading frame 106                    | 1 | 0 | 1 | 0 | 1 | 0 | 0 | 1 | hsa-miR-647 | -0.4  | N/A | Sites in UTR |
| PTPN14   | NM_005401    | protein tyrosine phosphatase, non-receptor type 14     | 1 | 0 | 1 | 0 | 1 | 0 | 1 | 0 | hsa-miR-647 | -0.4  | N/A | Sites in UTR |
| C9orf139 | NM_207511    | chromosome 9 open reading frame 139                    | 0 | 0 | 0 | 0 | 2 | 1 | 1 | 0 | hsa-miR-647 | -0.4  | N/A | Sites in UTR |
| ZRANB2   | NM_005455    | zinc finger, RAN-binding domain containing 2           | 0 | 0 | 0 | 0 | 1 | 1 | 0 | 0 | hsa-miR-647 | -0.4  | N/A | Sites in UTR |
| LPPR1    | NM_017753    | lipid phosphate phosphatase-related protein type 1     | 0 | 0 | 0 | 0 | 1 | 1 | 0 | 0 | hsa-miR-647 | -0.4  | N/A | Sites in UTR |
| TMEM115  | NM_007024    | transmembrane protein 115                              | 1 | 1 | 0 | 0 | 0 | 0 | 0 | 0 | hsa-miR-647 | -0.4  | N/A | Sites in UTR |
| PTGER3   | NM_198715    | prostaglandin E receptor 3 (subtype EP3)               | 0 | 0 | 0 | 0 | 2 | 1 | 0 | 1 | hsa-miR-647 | -0.4  | N/A | Sites in UTR |
| LDOC1    | NM_012317    | leucine zipper, down-regulated in cancer 1             | 0 | 0 | 0 | 0 | 1 | 1 | 0 | 0 | hsa-miR-647 | -0.39 | N/A | Sites in UTR |
| ANK2     | NM_001127493 | ankyrin 2, neuronal                                    | 0 | 0 | 0 | 0 | 1 | 1 | 0 | 0 | hsa-miR-647 | -0.39 | N/A | Sites in UTR |
| EXOC3L4  | NM_001077594 | exocyst complex component 3-like 4                     | 0 | 0 | 0 | 0 | 1 | 1 | 0 | 0 | hsa-miR-647 | -0.39 | N/A | Sites in UTR |
| TMEM174  | NM_153217    | transmembrane protein 174                              | 1 | 1 | 0 | 0 | 0 | 0 | 0 | 0 | hsa-miR-647 | -0.39 | N/A | Sites in UTR |

|          |              |                                                            |   |   |   |   |   |   |   |   |             |       |     |              |
|----------|--------------|------------------------------------------------------------|---|---|---|---|---|---|---|---|-------------|-------|-----|--------------|
| FBN2     | NM_001999    | fibrillin 2                                                | 0 | 0 | 0 | 0 | 1 | 1 | 0 | 0 | hsa-miR-647 | -0.39 | N/A | Sites in UTR |
| FAM107A  | NM_001076778 | family with sequence similarity 107, member A              | 1 | 0 | 1 | 0 | 1 | 0 | 1 | 0 | hsa-miR-647 | -0.39 | N/A | Sites in UTR |
| DNAJB12  | NM_001002762 | DnaJ (Hsp40) homolog, subfamily B, member 12               | 0 | 0 | 0 | 0 | 3 | 0 | 2 | 1 | hsa-miR-647 | -0.39 | N/A | Sites in UTR |
| FAM123B  | NM_152424    | family with sequence similarity 123B                       | 0 | 0 | 0 | 0 | 3 | 1 | 1 | 1 | hsa-miR-647 | -0.39 | N/A | Sites in UTR |
| TRMT2A   | NM_022727    | TRM2 tRNA methyltransferase 2 homolog A (S. cerevisiae)    | 0 | 0 | 0 | 0 | 1 | 1 | 0 | 0 | hsa-miR-647 | -0.39 | N/A | Sites in UTR |
| RASGRF1  | NM_001145648 | Ras protein-specific guanine nucleotide-releasing factor 1 | 0 | 0 | 0 | 0 | 3 | 0 | 1 | 2 | hsa-miR-647 | -0.39 | N/A | Sites in UTR |
| C17orf51 | NM_001113434 | chromosome 17 open reading frame 51                        | 0 | 0 | 0 | 0 | 4 | 0 | 3 | 1 | hsa-miR-647 | -0.39 | N/A | Sites in UTR |
| KRT31    | NM_002277    | keratin 31                                                 | 0 | 0 | 0 | 0 | 1 | 1 | 0 | 0 | hsa-miR-647 | -0.39 | N/A | Sites in UTR |
| HEPHL1   | NM_001098672 | hephaestin-like 1                                          | 0 | 0 | 0 | 0 | 1 | 1 | 0 | 0 | hsa-miR-647 | -0.39 | N/A | Sites in UTR |
| CISD3    | NM_001136498 | CDGSH iron sulfur domain 3                                 | 1 | 1 | 0 | 0 | 1 | 0 | 1 | 0 | hsa-miR-647 | -0.39 | N/A | Sites in UTR |
| FAM127A  | NM_001078171 | family with sequence similarity 127, member A              | 0 | 0 | 0 | 0 | 1 | 1 | 0 | 0 | hsa-miR-647 | -0.38 | N/A | Sites in UTR |
| MYLK2    | NM_033118    | myosin light chain kinase 2                                | 0 | 0 | 0 | 0 | 2 | 0 | 2 | 0 | hsa-miR-647 | -0.38 | N/A | Sites in UTR |
| ARL8A    | NM_138795    | ADP-ribosylation factor-like 8A                            | 0 | 0 | 0 | 0 | 1 | 1 | 0 | 0 | hsa-miR-647 | -0.38 | N/A | Sites in UTR |
| XYLT1    | NM_022166    | xylosyltransferase I                                       | 1 | 0 | 1 | 0 | 2 | 0 | 0 | 2 | hsa-miR-647 | -0.38 | N/A | Sites in UTR |
| CDADC1   | NM_001193478 | cytidine and dCMP deaminase domain containing 1            | 0 | 0 | 0 | 0 | 1 | 1 | 0 | 0 | hsa-miR-647 | -0.38 | N/A | Sites in UTR |
| EIF2C1   | NM_012199    | eukaryotic translation initiation factor 2C, 1             | 0 | 0 | 0 | 0 | 2 | 1 | 1 | 0 | hsa-miR-647 | -0.38 | N/A | Sites in UTR |
| SIRT5    | NM_001193267 | sirtuin 5                                                  | 0 | 0 | 0 | 0 | 1 | 1 | 0 | 0 | hsa-miR-647 | -0.38 | N/A | Sites in UTR |
| C12orf53 | NM_153685    | chromosome 12 open reading frame 53                        | 0 | 0 | 0 | 0 | 1 | 1 | 0 | 0 | hsa-miR-647 | -0.38 | N/A | Sites in UTR |

|          |              |                                                                                         |   |   |   |   |   |   |   |   |             |       |     |              |
|----------|--------------|-----------------------------------------------------------------------------------------|---|---|---|---|---|---|---|---|-------------|-------|-----|--------------|
| PRODH    | NM_001195226 | proline dehydrogenase (oxidase) 1                                                       | 0 | 0 | 0 | 0 | 1 | 1 | 0 | 0 | hsa-miR-647 | -0.38 | N/A | Sites in UTR |
| PPPDE2   | NM_015704    | PPPDE peptidase domain containing 2                                                     | 1 | 0 | 1 | 0 | 1 | 0 | 1 | 0 | hsa-miR-647 | -0.38 | N/A | Sites in UTR |
| PLCB3    | NM_000932    | phospholipase C, beta 3 (phosphatidylinositol-specific)                                 | 0 | 0 | 0 | 0 | 2 | 1 | 0 | 1 | hsa-miR-647 | -0.38 | N/A | Sites in UTR |
| MOBKLC2  | NM_145279    | MOB1, Mps One Binder kinase activator-like 2C (yeast)                                   | 0 | 0 | 0 | 0 | 1 | 0 | 1 | 0 | hsa-miR-647 | -0.38 | N/A | Sites in UTR |
| FKBP4    | NM_002014    | FK506 binding protein 4, 59kDa                                                          | 0 | 0 | 0 | 0 | 1 | 1 | 0 | 0 | hsa-miR-647 | -0.38 | N/A | Sites in UTR |
| PRKG1    | NM_001098512 | protein kinase, cGMP-dependent, type I                                                  | 1 | 1 | 0 | 0 | 0 | 0 | 0 | 0 | hsa-miR-647 | -0.38 | N/A | Sites in UTR |
| GALNTL1  | NM_001168368 | UDP-N-acetyl-alpha-D-galactosamine:polypeptide N-acetylgalactosaminyltransferase-like 1 | 0 | 0 | 0 | 0 | 2 | 1 | 1 | 0 | hsa-miR-647 | -0.38 | N/A | Sites in UTR |
| MYCBP    | NM_012333    | c-myc binding protein                                                                   | 0 | 0 | 0 | 0 | 1 | 1 | 0 | 0 | hsa-miR-647 | -0.37 | N/A | Sites in UTR |
| WDR31    | NM_001012361 | WD repeat domain 31                                                                     | 0 | 0 | 0 | 0 | 1 | 1 | 0 | 0 | hsa-miR-647 | -0.37 | N/A | Sites in UTR |
| SIN3B    | NM_015260    | SIN3 homolog B, transcription regulator (yeast)                                         | 0 | 0 | 0 | 0 | 2 | 1 | 0 | 1 | hsa-miR-647 | -0.37 | N/A | Sites in UTR |
| CXCR5    | NM_001716    | chemokine (C-X-C motif) receptor 5                                                      | 0 | 0 | 0 | 0 | 1 | 1 | 0 | 0 | hsa-miR-647 | -0.37 | N/A | Sites in UTR |
| INMT     | NM_001199219 | indoethylamine N-methyltransferase                                                      | 0 | 0 | 0 | 0 | 1 | 1 | 0 | 0 | hsa-miR-647 | -0.37 | N/A | Sites in UTR |
| SMPD4    | NM_001171083 | sphingomyelin phosphodiesterase 4, neutral membrane (neutral sphingomyelinase-3)        | 0 | 0 | 0 | 0 | 1 | 1 | 0 | 0 | hsa-miR-647 | -0.37 | N/A | Sites in UTR |
| TSSK6    | NM_032037    | testis-specific serine kinase 6                                                         | 0 | 0 | 0 | 0 | 1 | 1 | 0 | 0 | hsa-miR-647 | -0.37 | N/A | Sites in UTR |
| ALKBH5   | NM_017758    | alkB, alkylation repair homolog 5 (E. coli)                                             | 0 | 0 | 0 | 0 | 2 | 0 | 2 | 0 | hsa-miR-647 | -0.37 | N/A | Sites in UTR |
| STX16    | NM_001001433 | syntaxin 16                                                                             | 0 | 0 | 0 | 0 | 2 | 0 | 2 | 0 | hsa-miR-647 | -0.37 | N/A | Sites in UTR |
| SLC25A25 | NM_001006641 | solute carrier family 25 (mitochondrial carrier; phosphate carrier), member 25          | 0 | 0 | 0 | 0 | 2 | 0 | 2 | 0 | hsa-miR-647 | -0.37 | N/A | Sites in UTR |
| DAK      | NM_015533    | dihydroxyacetone kinase 2 homolog (S. cerevisiae)                                       | 0 | 0 | 0 | 0 | 2 | 1 | 1 | 0 | hsa-miR-647 | -0.37 | N/A | Sites in UTR |



|          |              |                                                     |   |   |   |   |   |   |   |   |             |       |     |              |
|----------|--------------|-----------------------------------------------------|---|---|---|---|---|---|---|---|-------------|-------|-----|--------------|
| CACNG8   | NM_031895    | calcium channel, voltage-dependent, gamma subunit 8 | 0 | 0 | 0 | 0 | 2 | 1 | 0 | 1 | hsa-miR-647 | -0.37 | N/A | Sites in UTR |
| SMURF1   | NM_001199847 | SMAD specific E3 ubiquitin protein ligase 1         | 1 | 0 | 1 | 0 | 1 | 0 | 1 | 0 | hsa-miR-647 | -0.37 | N/A | Sites in UTR |
| ZNF497   | NM_001207009 | zinc finger protein 497                             | 0 | 0 | 0 | 0 | 1 | 1 | 0 | 0 | hsa-miR-647 | -0.37 | N/A | Sites in UTR |
| TOR3A    | NM_022371    | torsin family 3, member A                           | 0 | 0 | 0 | 0 | 2 | 0 | 1 | 1 | hsa-miR-647 | -0.37 | N/A | Sites in UTR |
| SNX22    | NM_024798    | sorting nexin 22                                    | 0 | 0 | 0 | 0 | 2 | 0 | 1 | 1 | hsa-miR-647 | -0.37 | N/A | Sites in UTR |
| SHPK     | NM_013276    | sedoheptulokinase                                   | 0 | 0 | 0 | 0 | 2 | 0 | 2 | 0 | hsa-miR-647 | -0.37 | N/A | Sites in UTR |
| CXorf49  | NM_001145140 | chromosome X open reading frame 49                  | 0 | 0 | 0 | 0 | 1 | 1 | 0 | 0 | hsa-miR-647 | -0.37 | N/A | Sites in UTR |
| CXorf49B | NM_001145139 | chromosome X open reading frame 49B                 | 0 | 0 | 0 | 0 | 1 | 1 | 0 | 0 | hsa-miR-647 | -0.37 | N/A | Sites in UTR |
| TOM1L2   | NM_001033551 | target of myb1-like 2 (chicken)                     | 0 | 0 | 0 | 0 | 3 | 0 | 2 | 1 | hsa-miR-647 | -0.37 | N/A | Sites in UTR |
| MUS81    | NM_025128    | MUS81 endonuclease homolog (S. cerevisiae)          | 0 | 0 | 0 | 0 | 1 | 0 | 1 | 0 | hsa-miR-647 | -0.37 | N/A | Sites in UTR |
| HMGXB3   | NM_014983    | HMG box domain containing 3                         | 0 | 0 | 0 | 0 | 1 | 1 | 0 | 0 | hsa-miR-647 | -0.36 | N/A | Sites in UTR |
| TMEM110  | NM_198563    | transmembrane protein 110                           | 0 | 0 | 0 | 0 | 4 | 0 | 3 | 1 | hsa-miR-647 | -0.36 | N/A | Sites in UTR |
| TJP2     | NM_001170630 | tight junction protein 2 (zona occludens 2)         | 0 | 0 | 0 | 0 | 2 | 0 | 1 | 1 | hsa-miR-647 | -0.36 | N/A | Sites in UTR |
| FCHO2    | NM_001146032 | FCH domain only 2                                   | 0 | 0 | 0 | 0 | 1 | 1 | 0 | 0 | hsa-miR-647 | -0.36 | N/A | Sites in UTR |
| ZC3H18   | NM_144604    | zinc finger CCCH-type containing 18                 | 1 | 0 | 1 | 0 | 1 | 0 | 1 | 0 | hsa-miR-647 | -0.36 | N/A | Sites in UTR |
| HIP1R    | NM_003959    | huntingtin interacting protein 1 related            | 0 | 0 | 0 | 0 | 2 | 0 | 2 | 0 | hsa-miR-647 | -0.36 | N/A | Sites in UTR |
| PLA2G2D  | NM_012400    | phospholipase A2, group IID                         | 0 | 0 | 0 | 0 | 2 | 1 | 1 | 0 | hsa-miR-647 | -0.36 | N/A | Sites in UTR |
| HSPC159  | NM_014181    | galectin-related protein                            | 1 | 1 | 0 | 0 | 1 | 0 | 0 | 1 | hsa-miR-647 | -0.36 | N/A | Sites in UTR |

|          |              |                                                         |   |   |   |   |   |   |   |   |             |       |     |              |
|----------|--------------|---------------------------------------------------------|---|---|---|---|---|---|---|---|-------------|-------|-----|--------------|
| LGI4     | NM_139284    | leucine-rich repeat LGI family, member 4                | 0 | 0 | 0 | 0 | 1 | 1 | 0 | 0 | hsa-miR-647 | -0.36 | N/A | Sites in UTR |
| CLEC5A   | NM_013252    | C-type lectin domain family 5, member A                 | 0 | 0 | 0 | 0 | 2 | 1 | 0 | 1 | hsa-miR-647 | -0.36 | N/A | Sites in UTR |
| CDK1     | NM_001786    | cyclin-dependent kinase 1                               | 0 | 0 | 0 | 0 | 1 | 0 | 1 | 0 | hsa-miR-647 | -0.36 | N/A | Sites in UTR |
| NSUN4    | NM_199044    | NOP2/Sun domain family, member 4                        | 0 | 0 | 0 | 0 | 1 | 1 | 0 | 0 | hsa-miR-647 | -0.36 | N/A | Sites in UTR |
| SYT2     | NM_001136504 | synaptotagmin II                                        | 0 | 0 | 0 | 0 | 2 | 1 | 1 | 0 | hsa-miR-647 | -0.36 | N/A | Sites in UTR |
| GIGYF1   | NM_022574    | GRB10 interacting GYF protein 1                         | 1 | 1 | 0 | 0 | 1 | 0 | 1 | 0 | hsa-miR-647 | -0.36 | N/A | Sites in UTR |
| IFNG     | NM_000619    | interferon, gamma                                       | 0 | 0 | 0 | 0 | 1 | 1 | 0 | 0 | hsa-miR-647 | -0.36 | N/A | Sites in UTR |
| FBXL19   | NM_001099784 | F-box and leucine-rich repeat protein 19                | 1 | 1 | 0 | 0 | 0 | 0 | 0 | 0 | hsa-miR-647 | -0.36 | N/A | Sites in UTR |
| FCRL4    | NM_031282    | Fc receptor-like 4                                      | 0 | 0 | 0 | 0 | 1 | 1 | 0 | 0 | hsa-miR-647 | -0.36 | N/A | Sites in UTR |
| STX1B    | NM_052874    | syntaxin 1B                                             | 0 | 0 | 0 | 0 | 1 | 1 | 0 | 0 | hsa-miR-647 | -0.36 | N/A | Sites in UTR |
| C13orf31 | NM_001128303 | chromosome 13 open reading frame 31                     | 0 | 0 | 0 | 0 | 1 | 1 | 0 | 0 | hsa-miR-647 | -0.36 | N/A | Sites in UTR |
| HEATR6   | NM_022070    | HEAT repeat containing 6                                | 0 | 0 | 0 | 0 | 1 | 0 | 1 | 0 | hsa-miR-647 | -0.35 | N/A | Sites in UTR |
| ABCC6    | NM_001171    | ATP-binding cassette, sub-family C (CFTR/MRP), member 6 | 0 | 0 | 0 | 0 | 1 | 1 | 0 | 0 | hsa-miR-647 | -0.35 | N/A | Sites in UTR |
| NEK9     | NM_033116    | NIMA (never in mitosis gene a)- related kinase 9        | 0 | 0 | 0 | 0 | 1 | 1 | 0 | 0 | hsa-miR-647 | -0.35 | N/A | Sites in UTR |
| PHKB     | NM_000293    | phosphorylase kinase, beta                              | 0 | 0 | 0 | 0 | 2 | 0 | 1 | 1 | hsa-miR-647 | -0.35 | N/A | Sites in UTR |
| PAX3     | NM_000438    | paired box 3                                            | 0 | 0 | 0 | 0 | 1 | 1 | 0 | 0 | hsa-miR-647 | -0.35 | N/A | Sites in UTR |
| WIPI2    | NM_001033518 | WD repeat domain, phosphoinositide interacting 2        | 0 | 0 | 0 | 0 | 2 | 1 | 1 | 0 | hsa-miR-647 | -0.35 | N/A | Sites in UTR |
| AMOTL1   | NM_130847    | angiotenin like 1                                       | 1 | 0 | 0 | 1 | 3 | 0 | 2 | 1 | hsa-miR-647 | -0.35 | N/A | Sites in UTR |

|          |              |                                                                                              |   |   |   |   |   |   |   |   |             |       |     |              |
|----------|--------------|----------------------------------------------------------------------------------------------|---|---|---|---|---|---|---|---|-------------|-------|-----|--------------|
| PAFAH1B2 | NM_001184748 | platelet-activating factor acetylhydrolase 1b, catalytic subunit 2 (30kDa)                   | 0 | 0 | 0 | 0 | 1 | 1 | 0 | 0 | hsa-miR-647 | -0.35 | N/A | Sites in UTR |
| CRTC3    | NM_001042574 | CREB regulated transcription coactivator 3                                                   | 0 | 0 | 0 | 0 | 3 | 0 | 2 | 1 | hsa-miR-647 | -0.35 | N/A | Sites in UTR |
| ALDH4A1  | NM_001161504 | aldehyde dehydrogenase 4 family, member A1                                                   | 0 | 0 | 0 | 0 | 1 | 1 | 0 | 0 | hsa-miR-647 | -0.35 | N/A | Sites in UTR |
| MFSD4    | NM_181644    | major facilitator superfamily domain containing 4                                            | 0 | 0 | 0 | 0 | 2 | 0 | 1 | 1 | hsa-miR-647 | -0.35 | N/A | Sites in UTR |
| HECTD2   | NM_173497    | HECT domain containing 2                                                                     | 0 | 0 | 0 | 0 | 1 | 0 | 1 | 0 | hsa-miR-647 | -0.35 | N/A | Sites in UTR |
| NAGPA    | NM_016256    | N-acetylglucosamine-1-phosphodiester alpha-N-acetylglucosaminidase                           | 0 | 0 | 0 | 0 | 1 | 1 | 0 | 0 | hsa-miR-647 | -0.35 | N/A | Sites in UTR |
| ETNK2    | NM_018208    | ethanolamine kinase 2                                                                        | 0 | 0 | 0 | 0 | 2 | 0 | 2 | 0 | hsa-miR-647 | -0.35 | N/A | Sites in UTR |
| RASSF2   | NM_014737    | Ras association (RalGDS/AF-6) domain family member 2                                         | 0 | 0 | 0 | 0 | 3 | 0 | 2 | 1 | hsa-miR-647 | -0.35 | N/A | Sites in UTR |
| TTR      | NM_000371    | transthyretin                                                                                | 0 | 0 | 0 | 0 | 1 | 0 | 1 | 0 | hsa-miR-647 | -0.35 | N/A | Sites in UTR |
| CDH1     | NM_004360    | cadherin 1, type 1, E-cadherin (epithelial)                                                  | 1 | 1 | 0 | 0 | 0 | 0 | 0 | 0 | hsa-miR-647 | -0.35 | N/A | Sites in UTR |
| CACNA1B  | NM_000718    | calcium channel, voltage-dependent, N type, alpha 1B subunit                                 | 1 | 0 | 0 | 1 | 2 | 0 | 2 | 0 | hsa-miR-647 | -0.35 | N/A | Sites in UTR |
| SHB      | NM_003028    | Src homology 2 domain containing adaptor protein B                                           | 0 | 0 | 0 | 0 | 3 | 1 | 1 | 1 | hsa-miR-647 | -0.35 | N/A | Sites in UTR |
| HEMK1    | NM_016173    | HemK methyltransferase family member 1                                                       | 0 | 0 | 0 | 0 | 4 | 0 | 4 | 0 | hsa-miR-647 | -0.35 | N/A | Sites in UTR |
| PLEKHA4  | NM_001161354 | pleckstrin homology domain containing, family A (phosphoinositide binding specific) member 4 | 1 | 1 | 0 | 0 | 0 | 0 | 0 | 0 | hsa-miR-647 | -0.35 | N/A | Sites in UTR |
| MTF1     | NM_005955    | metal-regulatory transcription factor 1                                                      | 0 | 0 | 0 | 0 | 4 | 1 | 1 | 2 | hsa-miR-647 | -0.35 | N/A | Sites in UTR |
| CCDC141  | NM_173648    | coiled-coil domain containing 141                                                            | 0 | 0 | 0 | 0 | 1 | 0 | 1 | 0 | hsa-miR-647 | -0.34 | N/A | Sites in UTR |
| KIF26A   | NM_015656    | kinesin family member 26A                                                                    | 0 | 0 | 0 | 0 | 1 | 1 | 0 | 0 | hsa-miR-647 | -0.34 | N/A | Sites in UTR |
| ZNF319   | NM_020807    | zinc finger protein 319                                                                      | 0 | 0 | 0 | 0 | 3 | 0 | 1 | 2 | hsa-miR-647 | -0.34 | N/A | Sites in UTR |

|          |              |                                                           |   |   |   |   |   |   |   |   |             |       |     |              |
|----------|--------------|-----------------------------------------------------------|---|---|---|---|---|---|---|---|-------------|-------|-----|--------------|
| TBC1D30  | NM_015279    | TBC1 domain family, member 30                             | 0 | 0 | 0 | 0 | 3 | 1 | 2 | 0 | hsa-miR-647 | -0.34 | N/A | Sites in UTR |
| GADD45A  | NM_001199741 | growth arrest and DNA-damage-inducible, alpha             | 0 | 0 | 0 | 0 | 1 | 0 | 1 | 0 | hsa-miR-647 | -0.34 | N/A | Sites in UTR |
| NR1D2    | NM_001145425 | nuclear receptor subfamily 1, group D, member 2           | 0 | 0 | 0 | 0 | 1 | 1 | 0 | 0 | hsa-miR-647 | -0.34 | N/A | Sites in UTR |
| HUNK     | NM_014586    | hormonally up-regulated Neu-associated kinase             | 0 | 0 | 0 | 0 | 1 | 1 | 0 | 0 | hsa-miR-647 | -0.34 | N/A | Sites in UTR |
| SERINC3  | NM_006811    | serine incorporator 3                                     | 0 | 0 | 0 | 0 | 1 | 0 | 1 | 0 | hsa-miR-647 | -0.34 | N/A | Sites in UTR |
| FBXW8    | NM_012174    | F-box and WD repeat domain containing 8                   | 0 | 0 | 0 | 0 | 2 | 0 | 2 | 0 | hsa-miR-647 | -0.34 | N/A | Sites in UTR |
| OXCT1    | NM_000436    | 3-oxoacid CoA transferase 1                               | 0 | 0 | 0 | 0 | 1 | 0 | 1 | 0 | hsa-miR-647 | -0.34 | N/A | Sites in UTR |
| ZMYM6    | NM_007167    | zinc finger, MYM-type 6                                   | 0 | 0 | 0 | 0 | 1 | 0 | 1 | 0 | hsa-miR-647 | -0.34 | N/A | Sites in UTR |
| ROR2     | NM_004560    | receptor tyrosine kinase-like orphan receptor 2           | 0 | 0 | 0 | 0 | 1 | 1 | 0 | 0 | hsa-miR-647 | -0.34 | N/A | Sites in UTR |
| NIPBL    | NM_015384    | Nipped-B homolog (Drosophila)                             | 1 | 1 | 0 | 0 | 0 | 0 | 0 | 0 | hsa-miR-647 | -0.34 | N/A | Sites in UTR |
| C10orf81 | NM_001193434 | chromosome 10 open reading frame 81                       | 0 | 0 | 0 | 0 | 1 | 1 | 0 | 0 | hsa-miR-647 | -0.34 | N/A | Sites in UTR |
| FSCB     | NM_032135    | fibrous sheath CABYR binding protein                      | 0 | 0 | 0 | 0 | 1 | 0 | 1 | 0 | hsa-miR-647 | -0.34 | N/A | Sites in UTR |
| PPP1R3F  | NM_001184745 | protein phosphatase 1, regulatory (inhibitor) subunit 3F  | 0 | 0 | 0 | 0 | 2 | 0 | 1 | 1 | hsa-miR-647 | -0.34 | N/A | Sites in UTR |
| AQPEP    | NM_173800    | laeverin                                                  | 0 | 0 | 0 | 0 | 1 | 0 | 1 | 0 | hsa-miR-647 | -0.34 | N/A | Sites in UTR |
| MMP8     | NM_002424    | matrix metalloproteinase 8 (neutrophil collagenase)       | 0 | 0 | 0 | 0 | 1 | 1 | 0 | 0 | hsa-miR-647 | -0.34 | N/A | Sites in UTR |
| ITPRIP   | NM_033397    | inositol 1,4,5-trisphosphate receptor interacting protein | 0 | 0 | 0 | 0 | 1 | 1 | 0 | 0 | hsa-miR-647 | -0.34 | N/A | Sites in UTR |
| CHIT1    | NM_003465    | chitinase 1 (chitotriosidase)                             | 0 | 0 | 0 | 0 | 2 | 0 | 2 | 0 | hsa-miR-647 | -0.34 | N/A | Sites in UTR |
| BAIAP2L1 | NM_018842    | BAI1-associated protein 2-like 1                          | 0 | 0 | 0 | 0 | 3 | 0 | 2 | 1 | hsa-miR-647 | -0.34 | N/A | Sites in UTR |

|           |              |                                                                |   |   |   |   |   |   |   |   |             |       |     |              |
|-----------|--------------|----------------------------------------------------------------|---|---|---|---|---|---|---|---|-------------|-------|-----|--------------|
| TMEM132D  | NM_133448    | transmembrane protein 132D                                     | 0 | 0 | 0 | 0 | 2 | 0 | 1 | 1 | hsa-miR-647 | -0.34 | N/A | Sites in UTR |
| ARHGAP22  | NM_021226    | Rho GTPase activating protein 22                               | 0 | 0 | 0 | 0 | 2 | 0 | 2 | 0 | hsa-miR-647 | -0.34 | N/A | Sites in UTR |
| VSIG10L   | NM_001163922 | V-set and immunoglobulin domain containing 10 like             | 1 | 0 | 1 | 0 | 1 | 0 | 1 | 0 | hsa-miR-647 | -0.34 | N/A | Sites in UTR |
| PLCE1     | NM_001165979 | phospholipase C, epsilon 1                                     | 0 | 0 | 0 | 0 | 1 | 0 | 1 | 0 | hsa-miR-647 | -0.34 | N/A | Sites in UTR |
| SLC6A20   | NM_020208    | solute carrier family 6 (proline IMINO transporter), member 20 | 0 | 0 | 0 | 0 | 1 | 1 | 0 | 0 | hsa-miR-647 | -0.34 | N/A | Sites in UTR |
| EIF4EBP1  | NM_004095    | eukaryotic translation initiation factor 4E binding protein 1  | 0 | 0 | 0 | 0 | 1 | 1 | 0 | 0 | hsa-miR-647 | -0.34 | N/A | Sites in UTR |
| TPRG1L    | NM_182752    | tumor protein p63 regulated 1-like                             | 0 | 0 | 0 | 0 | 2 | 0 | 2 | 0 | hsa-miR-647 | -0.34 | N/A | Sites in UTR |
| C3orf43   | NM_001077657 | chromosome 3 open reading frame 43                             | 0 | 0 | 0 | 0 | 1 | 0 | 1 | 0 | hsa-miR-647 | -0.33 | N/A | Sites in UTR |
| TNIP1     | NM_006058    | TNFAIP3 interacting protein 1                                  | 0 | 0 | 0 | 0 | 1 | 1 | 0 | 0 | hsa-miR-647 | -0.33 | N/A | Sites in UTR |
| NLRP1     | NM_014922    | NLR family, pyrin domain containing 1                          | 0 | 0 | 0 | 0 | 1 | 1 | 0 | 0 | hsa-miR-647 | -0.33 | N/A | Sites in UTR |
| QTRTD1    | NM_024638    | queuine tRNA-ribosyltransferase domain containing 1            | 0 | 0 | 0 | 0 | 1 | 1 | 0 | 0 | hsa-miR-647 | -0.33 | N/A | Sites in UTR |
| SECISBP2L | NM_001193489 | SECIS binding protein 2-like                                   | 1 | 0 | 1 | 0 | 0 | 0 | 0 | 0 | hsa-miR-647 | -0.33 | N/A | Sites in UTR |
| PPL       | NM_002705    | periplakin                                                     | 0 | 0 | 0 | 0 | 1 | 1 | 0 | 0 | hsa-miR-647 | -0.33 | N/A | Sites in UTR |
| SRRM4     | NM_194286    | serine/arginine repetitive matrix 4                            | 0 | 0 | 0 | 0 | 2 | 0 | 2 | 0 | hsa-miR-647 | -0.33 | N/A | Sites in UTR |
| HTRA4     | NM_153692    | HtrA serine peptidase 4                                        | 0 | 0 | 0 | 0 | 1 | 0 | 1 | 0 | hsa-miR-647 | -0.33 | N/A | Sites in UTR |
| IQCJ      | NM_001042706 | IQ motif containing J                                          | 0 | 0 | 0 | 0 | 1 | 0 | 1 | 0 | hsa-miR-647 | -0.33 | N/A | Sites in UTR |
| CXCL9     | NM_002416    | chemokine (C-X-C motif) ligand 9                               | 0 | 0 | 0 | 0 | 1 | 1 | 0 | 0 | hsa-miR-647 | -0.33 | N/A | Sites in UTR |
| LCLAT1    | NM_001002257 | lysocardiolipin acyltransferase 1                              | 0 | 0 | 0 | 0 | 1 | 1 | 0 | 0 | hsa-miR-647 | -0.33 | N/A | Sites in UTR |

|          |              |                                                                       |   |   |   |   |   |   |   |   |             |       |     |              |
|----------|--------------|-----------------------------------------------------------------------|---|---|---|---|---|---|---|---|-------------|-------|-----|--------------|
| CENPB    | NM_001810    | centromere protein B, 80kDa                                           | 0 | 0 | 0 | 0 | 2 | 0 | 1 | 1 | hsa-miR-647 | -0.33 | N/A | Sites in UTR |
| TRAF1    | NM_001190945 | TNF receptor-associated factor 1                                      | 0 | 0 | 0 | 0 | 2 | 0 | 2 | 0 | hsa-miR-647 | -0.33 | N/A | Sites in UTR |
| ZNF609   | NM_015042    | zinc finger protein 609                                               | 1 | 0 | 1 | 0 | 1 | 1 | 0 | 0 | hsa-miR-647 | -0.33 | N/A | Sites in UTR |
| PDE8B    | NM_001029851 | phosphodiesterase 8B                                                  | 0 | 0 | 0 | 0 | 2 | 0 | 2 | 0 | hsa-miR-647 | -0.33 | N/A | Sites in UTR |
| KIF3C    | NM_002254    | kinesin family member 3C                                              | 0 | 0 | 0 | 0 | 1 | 1 | 0 | 0 | hsa-miR-647 | -0.33 | N/A | Sites in UTR |
| RPRD1B   | NM_021215    | regulation of nuclear pre-mRNA domain containing 1B                   | 0 | 0 | 0 | 0 | 2 | 0 | 1 | 1 | hsa-miR-647 | -0.33 | N/A | Sites in UTR |
| SS18     | NM_001007559 | synovial sarcoma translocation, chromosome 18                         | 0 | 0 | 0 | 0 | 1 | 0 | 1 | 0 | hsa-miR-647 | -0.33 | N/A | Sites in UTR |
| PIP4K2A  | NM_005028    | phosphatidylinositol-5-phosphate 4-kinase, type II, alpha             | 0 | 0 | 0 | 0 | 2 | 0 | 2 | 0 | hsa-miR-647 | -0.33 | N/A | Sites in UTR |
| SPRED2   | NM_001128210 | sprouty-related, EVH1 domain containing 2                             | 0 | 0 | 0 | 0 | 3 | 0 | 2 | 1 | hsa-miR-647 | -0.33 | N/A | Sites in UTR |
| BTBD1    | NM_001011885 | BTB (POZ) domain containing 1                                         | 0 | 0 | 0 | 0 | 1 | 0 | 1 | 0 | hsa-miR-647 | -0.33 | N/A | Sites in UTR |
| POU6F1   | NM_002702    | POU class 6 homeobox 1                                                | 0 | 0 | 0 | 0 | 2 | 0 | 1 | 1 | hsa-miR-647 | -0.33 | N/A | Sites in UTR |
| SLC36A2  | NM_181776    | solute carrier family 36 (proton/amino acid symporter), member 2      | 0 | 0 | 0 | 0 | 2 | 0 | 2 | 0 | hsa-miR-647 | -0.33 | N/A | Sites in UTR |
| PTMS     | NM_002824    | parathymosin                                                          | 0 | 0 | 0 | 0 | 1 | 1 | 0 | 0 | hsa-miR-647 | -0.33 | N/A | Sites in UTR |
| SSR3     | NM_007107    | signal sequence receptor, gamma (translocon-associated protein gamma) | 1 | 1 | 0 | 0 | 0 | 0 | 0 | 0 | hsa-miR-647 | -0.33 | N/A | Sites in UTR |
| KIAA1147 | NM_001080392 | KIAA1147                                                              | 0 | 0 | 0 | 0 | 1 | 1 | 0 | 0 | hsa-miR-647 | -0.33 | N/A | Sites in UTR |
| ZNF705D  | NM_001039615 | zinc finger protein 705D                                              | 0 | 0 | 0 | 0 | 2 | 0 | 1 | 1 | hsa-miR-647 | -0.33 | N/A | Sites in UTR |
| TSTD2    | NM_139246    | thiosulfate sulfurtransferase (rhodanese)-like domain containing 2    | 0 | 0 | 0 | 0 | 2 | 0 | 2 | 0 | hsa-miR-647 | -0.33 | N/A | Sites in UTR |
| FMOD     | NM_002023    | fibromodulin                                                          | 0 | 0 | 0 | 0 | 2 | 1 | 0 | 1 | hsa-miR-647 | -0.33 | N/A | Sites in UTR |

|          |              |                                                  |   |   |   |   |   |   |   |   |             |       |     |              |
|----------|--------------|--------------------------------------------------|---|---|---|---|---|---|---|---|-------------|-------|-----|--------------|
| PLXNA4   | NM_001105543 | plexin A4                                        | 0 | 0 | 0 | 0 | 1 | 1 | 0 | 0 | hsa-miR-647 | -0.33 | N/A | Sites in UTR |
| C16orf5  | NM_001199054 | chromosome 16 open reading frame 5               | 1 | 0 | 1 | 0 | 1 | 0 | 1 | 0 | hsa-miR-647 | -0.33 | N/A | Sites in UTR |
| GPD1L    | NM_015141    | glycerol-3-phosphate dehydrogenase 1-like        | 0 | 0 | 0 | 0 | 2 | 0 | 0 | 2 | hsa-miR-647 | -0.32 | N/A | Sites in UTR |
| IL18R1   | NM_003855    | interleukin 18 receptor 1                        | 0 | 0 | 0 | 0 | 1 | 1 | 0 | 0 | hsa-miR-647 | -0.32 | N/A | Sites in UTR |
| RIN3     | NM_024832    | Ras and Rab interactor 3                         | 0 | 0 | 0 | 0 | 1 | 1 | 0 | 0 | hsa-miR-647 | -0.32 | N/A | Sites in UTR |
| KIAA0930 | NM_001009880 | KIAA0930                                         | 1 | 0 | 0 | 1 | 3 | 0 | 3 | 0 | hsa-miR-647 | -0.32 | N/A | Sites in UTR |
| KDM5C    | NM_001146702 | lysine (K)-specific demethylase 5C               | 0 | 0 | 0 | 0 | 1 | 0 | 1 | 0 | hsa-miR-647 | -0.32 | N/A | Sites in UTR |
| TSPAN33  | NM_178562    | tetraspanin 33                                   | 1 | 1 | 0 | 0 | 0 | 0 | 0 | 0 | hsa-miR-647 | -0.32 | N/A | Sites in UTR |
| PADI2    | NM_007365    | peptidyl arginine deiminase, type II             | 0 | 0 | 0 | 0 | 2 | 0 | 2 | 0 | hsa-miR-647 | -0.32 | N/A | Sites in UTR |
| COG5     | NM_001161520 | component of oligomeric golgi complex 5          | 0 | 0 | 0 | 0 | 2 | 1 | 1 | 0 | hsa-miR-647 | -0.32 | N/A | Sites in UTR |
| PLA2G15  | NM_012320    | phospholipase A2, group XV                       | 0 | 0 | 0 | 0 | 1 | 1 | 0 | 0 | hsa-miR-647 | -0.32 | N/A | Sites in UTR |
| SH3PXD2B | NM_001017995 | SH3 and PX domains 2B                            | 0 | 0 | 0 | 0 | 2 | 1 | 1 | 0 | hsa-miR-647 | -0.32 | N/A | Sites in UTR |
| ZNF318   | NM_014345    | zinc finger protein 318                          | 0 | 0 | 0 | 0 | 1 | 0 | 1 | 0 | hsa-miR-647 | -0.32 | N/A | Sites in UTR |
| ZNF644   | NM_016620    | zinc finger protein 644                          | 0 | 0 | 0 | 0 | 1 | 0 | 1 | 0 | hsa-miR-647 | -0.32 | N/A | Sites in UTR |
| ITGA6    | NM_000210    | integrin, alpha 6                                | 0 | 0 | 0 | 0 | 2 | 0 | 0 | 2 | hsa-miR-647 | -0.32 | N/A | Sites in UTR |
| HNRNPUL2 | NM_001079559 | heterogeneous nuclear ribonucleoprotein U-like 2 | 1 | 1 | 0 | 0 | 1 | 0 | 0 | 1 | hsa-miR-647 | -0.32 | N/A | Sites in UTR |
| KATNAL2  | NM_031303    | katanin p60 subunit A-like 2                     | 0 | 0 | 0 | 0 | 1 | 1 | 0 | 0 | hsa-miR-647 | -0.32 | N/A | Sites in UTR |
| ZDHHC22  | NM_174976    | zinc finger, DHHC-type containing 22             | 1 | 1 | 0 | 0 | 0 | 0 | 0 | 0 | hsa-miR-647 | -0.32 | N/A | Sites in UTR |

|          |              |                                                 |   |   |   |   |   |   |   |   |             |       |     |              |
|----------|--------------|-------------------------------------------------|---|---|---|---|---|---|---|---|-------------|-------|-----|--------------|
| ZNF705A  | NM_001004328 | zinc finger protein 705A                        | 0 | 0 | 0 | 0 | 2 | 0 | 1 | 1 | hsa-miR-647 | -0.32 | N/A | Sites in UTR |
| MAVS     | NM_001206491 | mitochondrial antiviral signaling protein       | 0 | 0 | 0 | 0 | 5 | 0 | 3 | 2 | hsa-miR-647 | -0.32 | N/A | Sites in UTR |
| PHF13    | NM_153812    | PHD finger protein 13                           | 0 | 0 | 0 | 0 | 2 | 0 | 1 | 1 | hsa-miR-647 | -0.32 | N/A | Sites in UTR |
| SMAD2    | NM_001003652 | SMAD family member 2                            | 1 | 1 | 0 | 0 | 2 | 0 | 0 | 2 | hsa-miR-647 | -0.32 | N/A | Sites in UTR |
| PRAME    | NM_006115    | preferentially expressed antigen in melanoma    | 0 | 0 | 0 | 0 | 1 | 0 | 1 | 0 | hsa-miR-647 | -0.32 | N/A | Sites in UTR |
| IVD      | NM_001159508 | isovaleryl-CoA dehydrogenase                    | 0 | 0 | 0 | 0 | 1 | 1 | 0 | 0 | hsa-miR-647 | -0.32 | N/A | Sites in UTR |
| TRABD    | NM_025204    | TraB domain containing                          | 0 | 0 | 0 | 0 | 1 | 1 | 0 | 0 | hsa-miR-647 | -0.32 | N/A | Sites in UTR |
| CRY2     | NM_001127457 | cryptochrome 2 (photolyase-like)                | 1 | 0 | 1 | 0 | 1 | 0 | 1 | 0 | hsa-miR-647 | -0.32 | N/A | Sites in UTR |
| HSD17B14 | NM_016246    | hydroxysteroid (17-beta) dehydrogenase 14       | 0 | 0 | 0 | 0 | 1 | 0 | 1 | 0 | hsa-miR-647 | -0.32 | N/A | Sites in UTR |
| LSM14B   | NM_144703    | LSM14B, SCD6 homolog B (S. cerevisiae)          | 0 | 0 | 0 | 0 | 2 | 2 | 0 | 0 | hsa-miR-647 | -0.32 | N/A | Sites in UTR |
| LHFPL2   | NM_005779    | lipoma HMGIC fusion partner-like 2              | 0 | 0 | 0 | 0 | 2 | 1 | 1 | 0 | hsa-miR-647 | -0.32 | N/A | Sites in UTR |
| SP100    | NM_001080391 | SP100 nuclear antigen                           | 0 | 0 | 0 | 0 | 1 | 0 | 1 | 0 | hsa-miR-647 | -0.31 | N/A | Sites in UTR |
| GGPS1    | NM_001037277 | geranylgeranyl diphosphate synthase 1           | 0 | 0 | 0 | 0 | 1 | 0 | 1 | 0 | hsa-miR-647 | -0.31 | N/A | Sites in UTR |
| MCTP2    | NM_001159643 | multiple C2 domains, transmembrane 2            | 0 | 0 | 0 | 0 | 1 | 0 | 1 | 0 | hsa-miR-647 | -0.31 | N/A | Sites in UTR |
| GSG1     | NM_001080554 | germ cell associated 1                          | 0 | 0 | 0 | 0 | 1 | 0 | 1 | 0 | hsa-miR-647 | -0.31 | N/A | Sites in UTR |
| FUS      | NM_001170634 | fused in sarcoma                                | 0 | 0 | 0 | 0 | 1 | 1 | 0 | 0 | hsa-miR-647 | -0.31 | N/A | Sites in UTR |
| USP46    | NM_001134223 | ubiquitin specific peptidase 46                 | 0 | 0 | 0 | 0 | 1 | 0 | 1 | 0 | hsa-miR-647 | -0.31 | N/A | Sites in UTR |
| KBTBD12  | NM_207335    | kelch repeat and BTB (POZ) domain containing 12 | 0 | 0 | 0 | 0 | 2 | 0 | 1 | 1 | hsa-miR-647 | -0.31 | N/A | Sites in UTR |



|         |              |                                                                                                   |   |   |   |   |   |   |   |   |             |       |     |              |
|---------|--------------|---------------------------------------------------------------------------------------------------|---|---|---|---|---|---|---|---|-------------|-------|-----|--------------|
| ZNF70   | NM_021916    | zinc finger protein 70                                                                            | 0 | 0 | 0 | 0 | 2 | 0 | 2 | 0 | hsa-miR-647 | -0.31 | N/A | Sites in UTR |
| G3BP1   | NM_005754    | GTPase activating protein (SH3 domain) binding protein 1                                          | 0 | 0 | 0 | 0 | 1 | 0 | 1 | 0 | hsa-miR-647 | -0.31 | N/A | Sites in UTR |
| PAPOLG  | NM_022894    | poly(A) polymerase gamma                                                                          | 1 | 0 | 1 | 0 | 0 | 0 | 0 | 0 | hsa-miR-647 | -0.31 | N/A | Sites in UTR |
| BTN2A1  | NM_001197233 | butyrophilin, subfamily 2, member A1                                                              | 0 | 0 | 0 | 0 | 2 | 0 | 1 | 1 | hsa-miR-647 | -0.31 | N/A | Sites in UTR |
| CRTAP   | NM_006371    | cartilage associated protein                                                                      | 1 | 0 | 0 | 1 | 2 | 0 | 1 | 1 | hsa-miR-647 | -0.31 | N/A | Sites in UTR |
| C8orf83 | NM_001171795 | chromosome 8 open reading frame 83                                                                | 1 | 1 | 0 | 0 | 1 | 0 | 0 | 1 | hsa-miR-647 | -0.31 | N/A | Sites in UTR |
| GPR180  | NM_180989    | G protein-coupled receptor 180                                                                    | 0 | 0 | 0 | 0 | 3 | 0 | 2 | 1 | hsa-miR-647 | -0.31 | N/A | Sites in UTR |
| ZIC4    | NM_001168378 | Zic family member 4                                                                               | 0 | 0 | 0 | 0 | 1 | 1 | 0 | 0 | hsa-miR-647 | -0.31 | N/A | Sites in UTR |
| SMARCA5 | NM_003601    | SWI/SNF related, matrix associated, actin dependent regulator of chromatin, subfamily a, member 5 | 1 | 0 | 1 | 0 | 1 | 0 | 0 | 1 | hsa-miR-647 | -0.31 | N/A | Sites in UTR |
| CSNK1G1 | NM_022048    | casein kinase 1, gamma 1                                                                          | 1 | 0 | 1 | 0 | 3 | 1 | 1 | 1 | hsa-miR-647 | -0.31 | N/A | Sites in UTR |
| C7orf64 | NM_032120    | chromosome 7 open reading frame 64                                                                | 0 | 0 | 0 | 0 | 1 | 0 | 1 | 0 | hsa-miR-647 | -0.31 | N/A | Sites in UTR |
| GPR107  | NM_001136557 | G protein-coupled receptor 107                                                                    | 0 | 0 | 0 | 0 | 2 | 0 | 1 | 1 | hsa-miR-647 | -0.31 | N/A | Sites in UTR |
| MAZ     | NM_001042539 | MYC-associated zinc finger protein (purine-binding transcription factor)                          | 0 | 0 | 0 | 0 | 2 | 0 | 2 | 0 | hsa-miR-647 | -0.31 | N/A | Sites in UTR |
| FAM3C   | NM_001040020 | family with sequence similarity 3, member C                                                       | 1 | 0 | 1 | 0 | 0 | 0 | 0 | 0 | hsa-miR-647 | -0.31 | N/A | Sites in UTR |
| LRPAP1  | NM_002337    | low density lipoprotein receptor-related protein associated protein 1                             | 0 | 0 | 0 | 0 | 1 | 1 | 0 | 0 | hsa-miR-647 | -0.31 | N/A | Sites in UTR |
| PLXND1  | NM_015103    | plexin D1                                                                                         | 0 | 0 | 0 | 0 | 1 | 1 | 0 | 0 | hsa-miR-647 | -0.31 | N/A | Sites in UTR |
| DTX1    | NM_004416    | deltex homolog 1 (Drosophila)                                                                     | 0 | 0 | 0 | 0 | 2 | 0 | 1 | 1 | hsa-miR-647 | -0.31 | N/A | Sites in UTR |
| MATN1   | NM_002379    | matrilin 1, cartilage matrix protein                                                              | 0 | 0 | 0 | 0 | 2 | 0 | 2 | 0 | hsa-miR-647 | -0.31 | N/A | Sites in UTR |

|          |              |                                                                     |   |   |   |   |   |   |   |   |             |       |     |              |
|----------|--------------|---------------------------------------------------------------------|---|---|---|---|---|---|---|---|-------------|-------|-----|--------------|
| KPNA5    | NM_002269    | karyopherin alpha 5 (importin alpha 6)                              | 0 | 0 | 0 | 0 | 1 | 0 | 1 | 0 | hsa-miR-647 | -0.31 | N/A | Sites in UTR |
| WLS      | NM_001193334 | wntless homolog (Drosophila)                                        | 0 | 0 | 0 | 0 | 1 | 0 | 1 | 0 | hsa-miR-647 | -0.31 | N/A | Sites in UTR |
| CACNG4   | NM_014405    | calcium channel, voltage-dependent, gamma subunit 4                 | 0 | 0 | 0 | 0 | 1 | 1 | 0 | 0 | hsa-miR-647 | -0.31 | N/A | Sites in UTR |
| DPH3     | NM_001047434 | DPH3, KTI11 homolog (S. cerevisiae)                                 | 0 | 0 | 0 | 0 | 2 | 1 | 1 | 0 | hsa-miR-647 | -0.31 | N/A | Sites in UTR |
| HLA-DOA  | NM_002119    | major histocompatibility complex, class II, DO alpha                | 0 | 0 | 0 | 0 | 3 | 0 | 2 | 1 | hsa-miR-647 | -0.31 | N/A | Sites in UTR |
| C8orf22  | NM_001007176 | chromosome 8 open reading frame 22                                  | 0 | 0 | 0 | 0 | 1 | 0 | 1 | 0 | hsa-miR-647 | -0.3  | N/A | Sites in UTR |
| IL13     | NM_002188    | interleukin 13                                                      | 0 | 0 | 0 | 0 | 2 | 0 | 1 | 1 | hsa-miR-647 | -0.3  | N/A | Sites in UTR |
| CHD1     | NM_001270    | chromodomain helicase DNA binding protein 1                         | 1 | 0 | 1 | 0 | 0 | 0 | 0 | 0 | hsa-miR-647 | -0.3  | N/A | Sites in UTR |
| ICA1     | NM_004968    | islet cell autoantigen 1, 69kDa                                     | 0 | 0 | 0 | 0 | 1 | 0 | 1 | 0 | hsa-miR-647 | -0.3  | N/A | Sites in UTR |
| KCNK1    | NM_002245    | potassium channel, subfamily K, member 1                            | 0 | 0 | 0 | 0 | 1 | 0 | 1 | 0 | hsa-miR-647 | -0.3  | N/A | Sites in UTR |
| SOX21    | NM_007084    | SRY (sex determining region Y)-box 21                               | 0 | 0 | 0 | 0 | 1 | 1 | 0 | 0 | hsa-miR-647 | -0.3  | N/A | Sites in UTR |
| CNNM3    | NM_017623    | cyclin M3                                                           | 0 | 0 | 0 | 0 | 1 | 1 | 0 | 0 | hsa-miR-647 | -0.3  | N/A | Sites in UTR |
| RALGAPA2 | NM_020343    | Ral GTPase activating protein, alpha subunit 2 (catalytic)          | 0 | 0 | 0 | 0 | 2 | 0 | 2 | 0 | hsa-miR-647 | -0.3  | N/A | Sites in UTR |
| RASGEF1A | NM_145313    | RasGEF domain family, member 1A                                     | 0 | 0 | 0 | 0 | 2 | 1 | 0 | 1 | hsa-miR-647 | -0.3  | N/A | Sites in UTR |
| PPP1R12B | NM_001197131 | protein phosphatase 1, regulatory (inhibitor) subunit 12B           | 0 | 0 | 0 | 0 | 3 | 0 | 2 | 1 | hsa-miR-647 | -0.3  | N/A | Sites in UTR |
| SLC44A1  | NM_080546    | solute carrier family 44, member 1                                  | 1 | 0 | 0 | 1 | 1 | 0 | 0 | 1 | hsa-miR-647 | -0.3  | N/A | Sites in UTR |
| SLC2A6   | NM_001145099 | solute carrier family 2 (facilitated glucose transporter), member 6 | 0 | 0 | 0 | 0 | 1 | 1 | 0 | 0 | hsa-miR-647 | -0.3  | N/A | Sites in UTR |
| POLR1D   | NM_001206559 | polymerase (RNA) I polypeptide D, 16kDa                             | 1 | 1 | 0 | 0 | 0 | 0 | 0 | 0 | hsa-miR-647 | -0.3  | N/A | Sites in UTR |

|         |              |                                                                          |   |   |   |   |   |   |   |   |             |      |     |              |
|---------|--------------|--------------------------------------------------------------------------|---|---|---|---|---|---|---|---|-------------|------|-----|--------------|
| TXNDC6  | NM_178130    | thioredoxin domain containing 6                                          | 0 | 0 | 0 | 0 | 2 | 0 | 1 | 1 | hsa-miR-647 | -0.3 | N/A | Sites in UTR |
| CHMP6   | NM_024591    | chromatin modifying protein 6                                            | 0 | 0 | 0 | 0 | 2 | 0 | 2 | 0 | hsa-miR-647 | -0.3 | N/A | Sites in UTR |
| AAK1    | NM_014911    | AP2 associated kinase 1                                                  | 1 | 1 | 0 | 0 | 2 | 0 | 1 | 1 | hsa-miR-647 | -0.3 | N/A | Sites in UTR |
| TSEN15  | NM_001127394 | tRNA splicing endonuclease 15 homolog (S. cerevisiae)                    | 0 | 0 | 0 | 0 | 1 | 0 | 1 | 0 | hsa-miR-647 | -0.3 | N/A | Sites in UTR |
| COL18A1 | NM_030582    | collagen, type XVIII, alpha 1                                            | 0 | 0 | 0 | 0 | 2 | 0 | 1 | 1 | hsa-miR-647 | -0.3 | N/A | Sites in UTR |
| DEFB132 | NM_207469    | defensin, beta 132                                                       | 0 | 0 | 0 | 0 | 2 | 0 | 1 | 1 | hsa-miR-647 | -0.3 | N/A | Sites in UTR |
| MCM6    | NM_005915    | minichromosome maintenance complex component 6                           | 0 | 0 | 0 | 0 | 1 | 0 | 1 | 0 | hsa-miR-647 | -0.3 | N/A | Sites in UTR |
| FAM91A1 | NM_144963    | family with sequence similarity 91, member A1                            | 0 | 0 | 0 | 0 | 1 | 0 | 1 | 0 | hsa-miR-647 | -0.3 | N/A | Sites in UTR |
| IGSF10  | NM_001178145 | immunoglobulin superfamily, member 10                                    | 1 | 0 | 1 | 0 | 0 | 0 | 0 | 0 | hsa-miR-647 | -0.3 | N/A | Sites in UTR |
| CHGB    | NM_001819    | chromogranin B (secretogranin 1)                                         | 0 | 0 | 0 | 0 | 1 | 0 | 1 | 0 | hsa-miR-647 | -0.3 | N/A | Sites in UTR |
| ATP8B1  | NM_005603    | ATPase, aminophospholipid transporter, class I, type 8B, member 1        | 0 | 0 | 0 | 0 | 2 | 0 | 1 | 1 | hsa-miR-647 | -0.3 | N/A | Sites in UTR |
| MYBL1   | NM_001080416 | v-myb myeloblastosis viral oncogene homolog (avian)-like 1               | 0 | 0 | 0 | 0 | 1 | 0 | 1 | 0 | hsa-miR-647 | -0.3 | N/A | Sites in UTR |
| CARD17  | NM_001007232 | caspase recruitment domain family, member 17                             | 0 | 0 | 0 | 0 | 1 | 0 | 1 | 0 | hsa-miR-647 | -0.3 | N/A | Sites in UTR |
| ZNF275  | NM_001080485 | zinc finger protein 275                                                  | 0 | 0 | 0 | 0 | 2 | 0 | 1 | 1 | hsa-miR-647 | -0.3 | N/A | Sites in UTR |
| FURIN   | NM_002569    | furin (paired basic amino acid cleaving enzyme)                          | 0 | 0 | 0 | 0 | 2 | 1 | 1 | 0 | hsa-miR-647 | -0.3 | N/A | Sites in UTR |
| PDE3B   | NM_000922    | phosphodiesterase 3B, cGMP-inhibited                                     | 0 | 0 | 0 | 0 | 1 | 1 | 0 | 0 | hsa-miR-647 | -0.3 | N/A | Sites in UTR |
| FAM192A | NM_024946    | family with sequence similarity 192, member A                            | 1 | 1 | 0 | 0 | 0 | 0 | 0 | 0 | hsa-miR-647 | -0.3 | N/A | Sites in UTR |
| SPOCK2  | NM_001134434 | sparc/osteonectin, cwcv and kazal-like domains proteoglycan (testican) 2 | 0 | 0 | 0 | 0 | 2 | 0 | 1 | 1 | hsa-miR-647 | -0.3 | N/A | Sites in UTR |

|          |              |                                                                                         |   |   |   |   |   |   |   |   |             |       |     |              |
|----------|--------------|-----------------------------------------------------------------------------------------|---|---|---|---|---|---|---|---|-------------|-------|-----|--------------|
| DNAJB1   | NM_006145    | DnaJ (Hsp40) homolog, subfamily B, member 1                                             | 0 | 0 | 0 | 0 | 2 | 0 | 2 | 0 | hsa-miR-647 | -0.3  | N/A | Sites in UTR |
| GNAO1    | NM_138736    | guanine nucleotide binding protein (G protein), alpha activating activity polypeptide O | 0 | 0 | 0 | 0 | 3 | 0 | 3 | 0 | hsa-miR-647 | -0.3  | N/A | Sites in UTR |
| SPRR2G   | NM_001014291 | small proline-rich protein 2G                                                           | 0 | 0 | 0 | 0 | 1 | 0 | 1 | 0 | hsa-miR-647 | -0.29 | N/A | Sites in UTR |
| OGDHL    | NM_001143996 | oxoglutarate dehydrogenase-like                                                         | 0 | 0 | 0 | 0 | 1 | 0 | 1 | 0 | hsa-miR-647 | -0.29 | N/A | Sites in UTR |
| ADAMTSL2 | NM_001145320 | ADAMTS-like 2                                                                           | 0 | 0 | 0 | 0 | 1 | 1 | 0 | 0 | hsa-miR-647 | -0.29 | N/A | Sites in UTR |
| CCBP2    | NM_001296    | chemokine binding protein 2                                                             | 0 | 0 | 0 | 0 | 2 | 0 | 2 | 0 | hsa-miR-647 | -0.29 | N/A | Sites in UTR |
| NCOA1    | NM_003743    | nuclear receptor coactivator 1                                                          | 1 | 0 | 1 | 0 | 0 | 0 | 0 | 0 | hsa-miR-647 | -0.29 | N/A | Sites in UTR |
| CBLL1    | NM_024814    | Cas-Br-M (murine) ecotropic retroviral transforming sequence-like 1                     | 1 | 0 | 1 | 0 | 0 | 0 | 0 | 0 | hsa-miR-647 | -0.29 | N/A | Sites in UTR |
| OPTN     | NM_001008211 | optineurin                                                                              | 0 | 0 | 0 | 0 | 1 | 0 | 1 | 0 | hsa-miR-647 | -0.29 | N/A | Sites in UTR |
| ZWILCH   | NM_017975    | Zwilch, kinetochore associated, homolog (Drosophila)                                    | 0 | 0 | 0 | 0 | 1 | 0 | 1 | 0 | hsa-miR-647 | -0.29 | N/A | Sites in UTR |
| ANKRD23  | NM_144994    | ankyrin repeat domain 23                                                                | 0 | 0 | 0 | 0 | 1 | 1 | 0 | 0 | hsa-miR-647 | -0.29 | N/A | Sites in UTR |
| STARD9   | NM_020759    | StAR-related lipid transfer (START) domain containing 9                                 | 0 | 0 | 0 | 0 | 2 | 0 | 2 | 0 | hsa-miR-647 | -0.29 | N/A | Sites in UTR |
| GAL3ST4  | NM_024637    | galactose-3-O-sulfotransferase 4                                                        | 0 | 0 | 0 | 0 | 1 | 0 | 1 | 0 | hsa-miR-647 | -0.29 | N/A | Sites in UTR |
| POLE3    | NM_017443    | polymerase (DNA directed), epsilon 3 (p17 subunit)                                      | 0 | 0 | 0 | 0 | 1 | 1 | 0 | 0 | hsa-miR-647 | -0.29 | N/A | Sites in UTR |
| C12orf68 | NM_001013635 | chromosome 12 open reading frame 68                                                     | 0 | 0 | 0 | 0 | 1 | 1 | 0 | 0 | hsa-miR-647 | -0.29 | N/A | Sites in UTR |
| SLC11A1  | NM_000578    | solute carrier family 11 (proton-coupled divalent metal ion transporters), member 1     | 0 | 0 | 0 | 0 | 2 | 0 | 1 | 1 | hsa-miR-647 | -0.29 | N/A | Sites in UTR |
| UBE2L3   | NM_003347    | ubiquitin-conjugating enzyme E2L 3                                                      | 0 | 0 | 0 | 0 | 3 | 0 | 3 | 0 | hsa-miR-647 | -0.29 | N/A | Sites in UTR |
| ELOVL7   | NM_001104558 | ELOVL fatty acid elongase 7                                                             | 0 | 0 | 0 | 0 | 1 | 0 | 1 | 0 | hsa-miR-647 | -0.29 | N/A | Sites in UTR |

|          |              |                                                                                             |   |   |   |   |   |   |   |   |             |       |     |              |
|----------|--------------|---------------------------------------------------------------------------------------------|---|---|---|---|---|---|---|---|-------------|-------|-----|--------------|
| NAB1     | NM_005966    | NGFI-A binding protein 1 (EGR1 binding protein 1)                                           | 0 | 0 | 0 | 0 | 2 | 0 | 0 | 2 | hsa-miR-647 | -0.29 | N/A | Sites in UTR |
| FAM105A  | NM_019018    | family with sequence similarity 105, member A                                               | 0 | 0 | 0 | 0 | 2 | 0 | 2 | 0 | hsa-miR-647 | -0.29 | N/A | Sites in UTR |
| 4-Mar    | NM_020814    | membrane-associated ring finger (C3HC4) 4                                                   | 0 | 0 | 0 | 0 | 2 | 0 | 2 | 0 | hsa-miR-647 | -0.29 | N/A | Sites in UTR |
| FAM167A  | NM_053279    | family with sequence similarity 167, member A                                               | 0 | 0 | 0 | 0 | 2 | 1 | 1 | 0 | hsa-miR-647 | -0.29 | N/A | Sites in UTR |
| PDE6B    | NM_000283    | phosphodiesterase 6B, cGMP-specific, rod, beta                                              | 0 | 0 | 0 | 0 | 1 | 0 | 1 | 0 | hsa-miR-647 | -0.29 | N/A | Sites in UTR |
| FCGR2A   | NM_001136219 | Fc fragment of IgG, low affinity IIa, receptor (CD32)                                       | 0 | 0 | 0 | 0 | 2 | 0 | 0 | 2 | hsa-miR-647 | -0.29 | N/A | Sites in UTR |
| ZDHHC14  | NM_024630    | zinc finger, DHHC-type containing 14                                                        | 0 | 0 | 0 | 0 | 2 | 0 | 0 | 2 | hsa-miR-647 | -0.29 | N/A | Sites in UTR |
| NR2F2    | NM_001145155 | nuclear receptor subfamily 2, group F, member 2                                             | 1 | 1 | 0 | 0 | 0 | 0 | 0 | 0 | hsa-miR-647 | -0.29 | N/A | Sites in UTR |
| LPPR5    | NM_001010861 | lipid phosphate phosphatase-related protein type 5                                          | 0 | 0 | 0 | 0 | 1 | 1 | 0 | 0 | hsa-miR-647 | -0.29 | N/A | Sites in UTR |
| SLA      | NM_001045556 | Src-like-adaptor                                                                            | 0 | 0 | 0 | 0 | 2 | 0 | 1 | 1 | hsa-miR-647 | -0.29 | N/A | Sites in UTR |
| C22orf13 | NM_031444    | chromosome 22 open reading frame 13                                                         | 0 | 0 | 0 | 0 | 3 | 0 | 0 | 3 | hsa-miR-647 | -0.29 | N/A | Sites in UTR |
| SMCR8    | NM_144775    | Smith-Magenis syndrome chromosome region, candidate 8                                       | 1 | 0 | 1 | 0 | 3 | 0 | 3 | 0 | hsa-miR-647 | -0.29 | N/A | Sites in UTR |
| MASP1    | NM_001879    | mannan-binding lectin serine peptidase 1 (C4/C2 activating component of Ra-reactive factor) | 0 | 0 | 0 | 0 | 1 | 0 | 1 | 0 | hsa-miR-647 | -0.29 | N/A | Sites in UTR |
| C16orf46 | NM_152337    | chromosome 16 open reading frame 46                                                         | 0 | 0 | 0 | 0 | 1 | 0 | 1 | 0 | hsa-miR-647 | -0.29 | N/A | Sites in UTR |
| IDE      | NM_001165946 | insulin-degrading enzyme                                                                    | 0 | 0 | 0 | 0 | 1 | 1 | 0 | 0 | hsa-miR-647 | -0.29 | N/A | Sites in UTR |
| CAMKK1   | NM_032294    | calcium/calmodulin-dependent protein kinase kinase 1, alpha                                 | 0 | 0 | 0 | 0 | 1 | 1 | 0 | 0 | hsa-miR-647 | -0.29 | N/A | Sites in UTR |
| ANO9     | NM_001012302 | anoctamin 9                                                                                 | 0 | 0 | 0 | 0 | 2 | 0 | 1 | 1 | hsa-miR-647 | -0.29 | N/A | Sites in UTR |
| WIZ      | NM_021241    | widely interspaced zinc finger motifs                                                       | 0 | 0 | 0 | 0 | 2 | 0 | 2 | 0 | hsa-miR-647 | -0.29 | N/A | Sites in UTR |

|          |              |                                                              |   |   |   |   |   |   |   |   |             |       |     |              |
|----------|--------------|--------------------------------------------------------------|---|---|---|---|---|---|---|---|-------------|-------|-----|--------------|
| STAG1    | NM_005862    | stromal antigen 1                                            | 0 | 0 | 0 | 0 | 1 | 0 | 1 | 0 | hsa-miR-647 | -0.29 | N/A | Sites in UTR |
| UBL4B    | NM_203412    | ubiquitin-like 4B                                            | 0 | 0 | 0 | 0 | 1 | 1 | 0 | 0 | hsa-miR-647 | -0.29 | N/A | Sites in UTR |
| C1orf229 | NM_207401    | chromosome 1 open reading frame 229                          | 0 | 0 | 0 | 0 | 1 | 1 | 0 | 0 | hsa-miR-647 | -0.29 | N/A | Sites in UTR |
| ODC1     | NM_002539    | ornithine decarboxylase 1                                    | 0 | 0 | 0 | 0 | 1 | 0 | 1 | 0 | hsa-miR-647 | -0.29 | N/A | Sites in UTR |
| SUDS3    | NM_022491    | suppressor of defective silencing 3 homolog (S. cerevisiae)  | 0 | 0 | 0 | 0 | 1 | 0 | 1 | 0 | hsa-miR-647 | -0.29 | N/A | Sites in UTR |
| TRIM40   | NM_138700    | tripartite motif containing 40                               | 0 | 0 | 0 | 0 | 2 | 0 | 0 | 2 | hsa-miR-647 | -0.29 | N/A | Sites in UTR |
| EP400    | NM_015409    | E1A binding protein p400                                     | 0 | 0 | 0 | 0 | 1 | 1 | 0 | 0 | hsa-miR-647 | -0.29 | N/A | Sites in UTR |
| MFNG     | NM_001166343 | MFNG O-fucosylpeptide 3-beta-N-acetylglucosaminyltransferase | 1 | 0 | 1 | 0 | 1 | 0 | 0 | 1 | hsa-miR-647 | -0.29 | N/A | Sites in UTR |
| LIPG     | NM_006033    | lipase, endothelial                                          | 0 | 0 | 0 | 0 | 2 | 0 | 2 | 0 | hsa-miR-647 | -0.29 | N/A | Sites in UTR |
| SLFN13   | NM_144682    | schlafen family member 13                                    | 0 | 0 | 0 | 0 | 3 | 0 | 2 | 1 | hsa-miR-647 | -0.29 | N/A | Sites in UTR |
| RAPGEF3  | NM_001098531 | Rap guanine nucleotide exchange factor (GEF) 3               | 0 | 0 | 0 | 0 | 4 | 0 | 3 | 1 | hsa-miR-647 | -0.29 | N/A | Sites in UTR |
| HPGDS    | NM_014485    | hematopoietic prostaglandin D synthase                       | 0 | 0 | 0 | 0 | 1 | 0 | 1 | 0 | hsa-miR-647 | -0.28 | N/A | Sites in UTR |
| CPT1A    | NM_001876    | carnitine palmitoyltransferase 1A (liver)                    | 0 | 0 | 0 | 0 | 2 | 0 | 1 | 1 | hsa-miR-647 | -0.28 | N/A | Sites in UTR |
| ANK1     | NM_000037    | ankyrin 1, erythrocytic                                      | 0 | 0 | 0 | 0 | 1 | 1 | 0 | 0 | hsa-miR-647 | -0.28 | N/A | Sites in UTR |
| DUSP8    | NM_004420    | dual specificity phosphatase 8                               | 0 | 0 | 0 | 0 | 3 | 0 | 2 | 1 | hsa-miR-647 | -0.28 | N/A | Sites in UTR |
| KIN      | NM_012311    | KIN, antigenic determinant of recA protein homolog (mouse)   | 0 | 0 | 0 | 0 | 1 | 0 | 1 | 0 | hsa-miR-647 | -0.28 | N/A | Sites in UTR |
| SLC39A1  | NM_014437    | solute carrier family 39 (zinc transporter), member 1        | 0 | 0 | 0 | 0 | 1 | 0 | 1 | 0 | hsa-miR-647 | -0.28 | N/A | Sites in UTR |
| TRIM4    | NM_033017    | tripartite motif containing 4                                | 0 | 0 | 0 | 0 | 1 | 0 | 1 | 0 | hsa-miR-647 | -0.28 | N/A | Sites in UTR |

|           |              |                                                                     |   |   |   |   |   |   |   |   |             |       |     |              |
|-----------|--------------|---------------------------------------------------------------------|---|---|---|---|---|---|---|---|-------------|-------|-----|--------------|
| C11orf85  | NM_001037225 | chromosome 11 open reading frame 85                                 | 0 | 0 | 0 | 0 | 1 | 0 | 1 | 0 | hsa-miR-647 | -0.28 | N/A | Sites in UTR |
| ARHGEF37  | NM_001001669 | Rho guanine nucleotide exchange factor (GEF) 37                     | 0 | 0 | 0 | 0 | 2 | 0 | 2 | 0 | hsa-miR-647 | -0.28 | N/A | Sites in UTR |
| SAMD4B    | NM_018028    | sterile alpha motif domain containing 4B                            | 0 | 0 | 0 | 0 | 3 | 0 | 2 | 1 | hsa-miR-647 | -0.28 | N/A | Sites in UTR |
| CAMKK2    | NM_172214    | calcium/calmodulin-dependent protein kinase kinase 2, beta          | 0 | 0 | 0 | 0 | 1 | 0 | 1 | 0 | hsa-miR-647 | -0.28 | N/A | Sites in UTR |
| LY6K      | NM_001160354 | lymphocyte antigen 6 complex, locus K                               | 0 | 0 | 0 | 0 | 1 | 0 | 1 | 0 | hsa-miR-647 | -0.28 | N/A | Sites in UTR |
| C1orf27   | NM_001164245 | chromosome 1 open reading frame 27                                  | 0 | 0 | 0 | 0 | 1 | 0 | 1 | 0 | hsa-miR-647 | -0.28 | N/A | Sites in UTR |
| SLC9A9    | NM_173653    | solute carrier family 9 (sodium/hydrogen exchanger), member 9       | 1 | 0 | 1 | 0 | 0 | 0 | 0 | 0 | hsa-miR-647 | -0.28 | N/A | Sites in UTR |
| ZNF660    | NM_173658    | zinc finger protein 660                                             | 0 | 0 | 0 | 0 | 1 | 0 | 1 | 0 | hsa-miR-647 | -0.28 | N/A | Sites in UTR |
| LDOC1L    | NM_032287    | leucine zipper, down-regulated in cancer 1-like                     | 1 | 0 | 1 | 0 | 3 | 0 | 2 | 1 | hsa-miR-647 | -0.28 | N/A | Sites in UTR |
| KIAA1826  | NM_032424    | KIAA1826                                                            | 0 | 0 | 0 | 0 | 1 | 0 | 1 | 0 | hsa-miR-647 | -0.28 | N/A | Sites in UTR |
| DCBLD2    | NM_080927    | discoidin, CUB and LCCL domain containing 2                         | 0 | 0 | 0 | 0 | 1 | 0 | 1 | 0 | hsa-miR-647 | -0.28 | N/A | Sites in UTR |
| C17orf100 | NM_001105520 | chromosome 17 open reading frame 100                                | 0 | 0 | 0 | 0 | 2 | 0 | 0 | 2 | hsa-miR-647 | -0.28 | N/A | Sites in UTR |
| VWA5B1    | NM_001039500 | von Willebrand factor A domain containing 5B1                       | 0 | 0 | 0 | 0 | 2 | 0 | 1 | 1 | hsa-miR-647 | -0.28 | N/A | Sites in UTR |
| SRSF2     | NM_001195427 | serine/arginine-rich splicing factor 2                              | 0 | 0 | 0 | 0 | 1 | 0 | 1 | 0 | hsa-miR-647 | -0.28 | N/A | Sites in UTR |
| CUL1      | NM_003592    | cullin 1                                                            | 0 | 0 | 0 | 0 | 1 | 0 | 1 | 0 | hsa-miR-647 | -0.28 | N/A | Sites in UTR |
| KIF4B     | NM_001099293 | kinesin family member 4B                                            | 0 | 0 | 0 | 0 | 1 | 0 | 1 | 0 | hsa-miR-647 | -0.28 | N/A | Sites in UTR |
| CHL1      | NM_006614    | cell adhesion molecule with homology to L1CAM (close homolog of L1) | 0 | 0 | 0 | 0 | 3 | 0 | 0 | 3 | hsa-miR-647 | -0.28 | N/A | Sites in UTR |
| SH3TC2    | NM_024577    | SH3 domain and tetratricopeptide repeats 2                          | 0 | 0 | 0 | 0 | 6 | 1 | 3 | 2 | hsa-miR-647 | -0.28 | N/A | Sites in UTR |

|            |              |                                                                                                               |   |   |   |   |   |   |   |   |             |       |     |              |
|------------|--------------|---------------------------------------------------------------------------------------------------------------|---|---|---|---|---|---|---|---|-------------|-------|-----|--------------|
| DDTL       | NM_001084393 | D-dopachrome tautomerase-like                                                                                 | 0 | 0 | 0 | 0 | 1 | 0 | 1 | 0 | hsa-miR-647 | -0.28 | N/A | Sites in UTR |
| PDCD1      | NM_005018    | programmed cell death 1                                                                                       | 0 | 0 | 0 | 0 | 1 | 1 | 0 | 0 | hsa-miR-647 | -0.28 | N/A | Sites in UTR |
| SMG5       | NM_015327    | smg-5 homolog, nonsense mediated mRNA decay factor (C. elegans)                                               | 1 | 0 | 1 | 0 | 1 | 0 | 1 | 0 | hsa-miR-647 | -0.28 | N/A | Sites in UTR |
| SEC13      | NM_001136232 | SEC13 homolog (S. cerevisiae)                                                                                 | 0 | 0 | 0 | 0 | 1 | 0 | 1 | 0 | hsa-miR-647 | -0.28 | N/A | Sites in UTR |
| SLC14A1    | NM_001128588 | solute carrier family 14 (urea transporter), member 1 (Kidd blood group)                                      | 0 | 0 | 0 | 0 | 1 | 0 | 1 | 0 | hsa-miR-647 | -0.28 | N/A | Sites in UTR |
| ZSCAN23    | NM_001012455 | zinc finger and SCAN domain containing 23                                                                     | 0 | 0 | 0 | 0 | 1 | 0 | 1 | 0 | hsa-miR-647 | -0.28 | N/A | Sites in UTR |
| PARK2      | NM_004562    | parkinson protein 2, E3 ubiquitin protein ligase (parkin)                                                     | 0 | 0 | 0 | 0 | 2 | 0 | 1 | 1 | hsa-miR-647 | -0.28 | N/A | Sites in UTR |
| TMEM35     | NM_021637    | transmembrane protein 35                                                                                      | 0 | 0 | 0 | 0 | 1 | 1 | 0 | 0 | hsa-miR-647 | -0.28 | N/A | Sites in UTR |
| USP20      | NM_001008563 | ubiquitin specific peptidase 20                                                                               | 0 | 0 | 0 | 0 | 2 | 0 | 2 | 0 | hsa-miR-647 | -0.28 | N/A | Sites in UTR |
| CCDC6      | NM_005436    | coiled-coil domain containing 6                                                                               | 1 | 0 | 1 | 0 | 0 | 0 | 0 | 0 | hsa-miR-647 | -0.28 | N/A | Sites in UTR |
| RGS5       | NM_001195303 | regulator of G-protein signaling 5                                                                            | 0 | 0 | 0 | 0 | 1 | 0 | 1 | 0 | hsa-miR-647 | -0.28 | N/A | Sites in UTR |
| RGS20      | NM_003702    | regulator of G-protein signaling 20                                                                           | 0 | 0 | 0 | 0 | 1 | 0 | 1 | 0 | hsa-miR-647 | -0.28 | N/A | Sites in UTR |
| ABCA9      | NM_080283    | ATP-binding cassette, sub-family A (ABC1), member 9                                                           | 0 | 0 | 0 | 0 | 1 | 0 | 1 | 0 | hsa-miR-647 | -0.28 | N/A | Sites in UTR |
| SOX12      | NM_006943    | SRY (sex determining region Y)-box 12                                                                         | 1 | 0 | 1 | 0 | 2 | 0 | 1 | 1 | hsa-miR-647 | -0.28 | N/A | Sites in UTR |
| PBLD       | NM_022129    | phenazine biosynthesis-like protein domain containing                                                         | 0 | 0 | 0 | 0 | 1 | 0 | 1 | 0 | hsa-miR-647 | -0.28 | N/A | Sites in UTR |
| B4GALT6    | NM_004775    | UDP-Gal:betaGlcNAc beta 1,4- galactosyltransferase, polypeptide 6                                             | 0 | 0 | 0 | 0 | 2 | 0 | 0 | 2 | hsa-miR-647 | -0.28 | N/A | Sites in UTR |
| ST6GALNAC6 | NM_013443    | ST6 (alpha-N-acetyl-neuraminyl-2,3-beta-galactosyl-1,3)-N-acetylgalactosaminide alpha-2,6-sialyltransferase 6 | 0 | 0 | 0 | 0 | 2 | 0 | 0 | 2 | hsa-miR-647 | -0.28 | N/A | Sites in UTR |
| FAM196A    | NM_001039762 | family with sequence similarity 196, member A                                                                 | 1 | 0 | 1 | 0 | 1 | 0 | 1 | 0 | hsa-miR-647 | -0.28 | N/A | Sites in UTR |



|          |              |                                                                                                                          |   |   |   |   |   |   |   |   |   |             |       |     |              |
|----------|--------------|--------------------------------------------------------------------------------------------------------------------------|---|---|---|---|---|---|---|---|---|-------------|-------|-----|--------------|
| WDR64    | NM_144625    | WD repeat domain 64                                                                                                      | 1 | 0 | 1 | 0 | 0 | 0 | 0 | 0 | 0 | hsa-miR-647 | -0.28 | N/A | Sites in UTR |
| MS4A2    | NM_000139    | membrane-spanning 4-domains, subfamily A, member 2 (Fc fragment of IgE, high affinity I, receptor for; beta polypeptide) | 0 | 0 | 0 | 0 | 2 | 0 | 1 | 1 | 1 | hsa-miR-647 | -0.28 | N/A | Sites in UTR |
| RNF24    | NM_001134337 | ring finger protein 24                                                                                                   | 0 | 0 | 0 | 0 | 2 | 0 | 1 | 1 | 1 | hsa-miR-647 | -0.28 | N/A | Sites in UTR |
| POMT2    | NM_013382    | protein-O-mannosyltransferase 2                                                                                          | 0 | 0 | 0 | 0 | 2 | 0 | 1 | 1 | 1 | hsa-miR-647 | -0.28 | N/A | Sites in UTR |
| ARFGAP1  | NM_018209    | ADP-ribosylation factor GTPase activating protein 1                                                                      | 0 | 0 | 0 | 0 | 2 | 0 | 2 | 0 | 0 | hsa-miR-647 | -0.28 | N/A | Sites in UTR |
| SRSF8    | NM_032102    | serine/arginine-rich splicing factor 8                                                                                   | 0 | 0 | 0 | 0 | 1 | 0 | 1 | 0 | 0 | hsa-miR-647 | -0.27 | N/A | Sites in UTR |
| HECW2    | NM_020760    | HECT, C2 and WW domain containing E3 ubiquitin protein ligase 2                                                          | 0 | 0 | 0 | 0 | 1 | 0 | 1 | 0 | 0 | hsa-miR-647 | -0.27 | N/A | Sites in UTR |
| FAM127C  | NM_001078173 | family with sequence similarity 127, member C                                                                            | 0 | 0 | 0 | 0 | 1 | 1 | 0 | 0 | 0 | hsa-miR-647 | -0.27 | N/A | Sites in UTR |
| FXC1     | NM_012192    | fracture callus 1 homolog (rat)                                                                                          | 0 | 0 | 0 | 0 | 2 | 1 | 0 | 1 | 1 | hsa-miR-647 | -0.27 | N/A | Sites in UTR |
| FBXO44   | NM_001014765 | F-box protein 44                                                                                                         | 0 | 0 | 0 | 0 | 2 | 1 | 0 | 1 | 1 | hsa-miR-647 | -0.27 | N/A | Sites in UTR |
| PRKD3    | NM_005813    | protein kinase D3                                                                                                        | 0 | 0 | 0 | 0 | 2 | 0 | 2 | 0 | 0 | hsa-miR-647 | -0.27 | N/A | Sites in UTR |
| CCND2    | NM_001759    | cyclin D2                                                                                                                | 0 | 0 | 0 | 0 | 3 | 0 | 2 | 1 | 1 | hsa-miR-647 | -0.27 | N/A | Sites in UTR |
| C6orf162 | NM_001042493 | chromosome 6 open reading frame 162                                                                                      | 0 | 0 | 0 | 0 | 1 | 0 | 1 | 0 | 0 | hsa-miR-647 | -0.27 | N/A | Sites in UTR |
| F2RL3    | NM_003950    | coagulation factor II (thrombin) receptor-like 3                                                                         | 0 | 0 | 0 | 0 | 2 | 0 | 1 | 1 | 1 | hsa-miR-647 | -0.27 | N/A | Sites in UTR |
| GDAP2    | NM_017686    | ganglioside induced differentiation associated protein 2                                                                 | 0 | 0 | 0 | 0 | 2 | 0 | 2 | 0 | 0 | hsa-miR-647 | -0.27 | N/A | Sites in UTR |
| TRIM7    | NM_203293    | tripartite motif containing 7                                                                                            | 0 | 0 | 0 | 0 | 1 | 0 | 1 | 0 | 0 | hsa-miR-647 | -0.27 | N/A | Sites in UTR |
| KLHDC7A  | NM_152375    | kelch domain containing 7A                                                                                               | 0 | 0 | 0 | 0 | 2 | 0 | 1 | 1 | 1 | hsa-miR-647 | -0.27 | N/A | Sites in UTR |
| DIDO1    | NM_001193370 | death inducer-obliterators 1                                                                                             | 0 | 0 | 0 | 0 | 1 | 1 | 0 | 0 | 0 | hsa-miR-647 | -0.27 | N/A | Sites in UTR |

|          |              |                                                                              |   |   |   |   |   |   |   |   |             |       |     |              |
|----------|--------------|------------------------------------------------------------------------------|---|---|---|---|---|---|---|---|-------------|-------|-----|--------------|
| PLIN4    | NM_001080400 | perilipin 4                                                                  | 0 | 0 | 0 | 0 | 3 | 0 | 1 | 2 | hsa-miR-647 | -0.27 | N/A | Sites in UTR |
| SDHC     | NM_001035511 | succinate dehydrogenase complex, subunit C, integral membrane protein, 15kDa | 0 | 0 | 0 | 0 | 1 | 0 | 1 | 0 | hsa-miR-647 | -0.27 | N/A | Sites in UTR |
| ZNF507   | NM_001136156 | zinc finger protein 507                                                      | 0 | 0 | 0 | 0 | 1 | 0 | 1 | 0 | hsa-miR-647 | -0.27 | N/A | Sites in UTR |
| UHMK1    | NM_001184763 | U2AF homology motif (UHM) kinase 1                                           | 0 | 0 | 0 | 0 | 1 | 0 | 1 | 0 | hsa-miR-647 | -0.27 | N/A | Sites in UTR |
| ZNF488   | NM_153034    | zinc finger protein 488                                                      | 0 | 0 | 0 | 0 | 2 | 0 | 1 | 1 | hsa-miR-647 | -0.27 | N/A | Sites in UTR |
| RUNX3    | NM_001031680 | runt-related transcription factor 3                                          | 0 | 0 | 0 | 0 | 3 | 0 | 1 | 2 | hsa-miR-647 | -0.27 | N/A | Sites in UTR |
| HTATIP2  | NM_001098520 | HIV-1 Tat interactive protein 2, 30kDa                                       | 0 | 0 | 0 | 0 | 1 | 0 | 1 | 0 | hsa-miR-647 | -0.27 | N/A | Sites in UTR |
| ICA1L    | NM_138468    | islet cell autoantigen 1,69kDa-like                                          | 1 | 0 | 0 | 1 | 1 | 0 | 0 | 1 | hsa-miR-647 | -0.27 | N/A | Sites in UTR |
| AIM1     | NM_001624    | absent in melanoma 1                                                         | 0 | 0 | 0 | 0 | 2 | 0 | 1 | 1 | hsa-miR-647 | -0.27 | N/A | Sites in UTR |
| GRIN3A   | NM_133445    | glutamate receptor, ionotropic, N-methyl-D-aspartate 3A                      | 0 | 0 | 0 | 0 | 2 | 0 | 1 | 1 | hsa-miR-647 | -0.27 | N/A | Sites in UTR |
| SARM1    | NM_015077    | sterile alpha and TIR motif containing 1                                     | 0 | 0 | 0 | 0 | 2 | 0 | 2 | 0 | hsa-miR-647 | -0.27 | N/A | Sites in UTR |
| KIAA0564 | NM_015058    | KIAA0564                                                                     | 0 | 0 | 0 | 0 | 1 | 0 | 1 | 0 | hsa-miR-647 | -0.27 | N/A | Sites in UTR |
| EIF2A    | NM_032025    | eukaryotic translation initiation factor 2A, 65kDa                           | 0 | 0 | 0 | 0 | 1 | 0 | 1 | 0 | hsa-miR-647 | -0.27 | N/A | Sites in UTR |
| ELOF1    | NM_032377    | elongation factor 1 homolog (S. cerevisiae)                                  | 0 | 0 | 0 | 0 | 1 | 0 | 1 | 0 | hsa-miR-647 | -0.27 | N/A | Sites in UTR |
| ATP2A3   | NM_005173    | ATPase, Ca++ transporting, ubiquitous                                        | 0 | 0 | 0 | 0 | 1 | 1 | 0 | 0 | hsa-miR-647 | -0.27 | N/A | Sites in UTR |
| SLC9A6   | NM_001042537 | solute carrier family 9 (sodium/hydrogen exchanger), member 6                | 1 | 1 | 0 | 0 | 0 | 0 | 0 | 0 | hsa-miR-647 | -0.27 | N/A | Sites in UTR |
| FAM84B   | NM_174911    | family with sequence similarity 84, member B                                 | 0 | 0 | 0 | 0 | 1 | 1 | 0 | 0 | hsa-miR-647 | -0.27 | N/A | Sites in UTR |
| C15orf2  | NM_018958    | chromosome 15 open reading frame 2                                           | 0 | 0 | 0 | 0 | 2 | 0 | 1 | 1 | hsa-miR-647 | -0.27 | N/A | Sites in UTR |

|         |              |                                                           |   |   |   |   |   |   |   |   |             |       |     |              |
|---------|--------------|-----------------------------------------------------------|---|---|---|---|---|---|---|---|-------------|-------|-----|--------------|
| CCDC78  | NM_001031737 | coiled-coil domain containing 78                          | 0 | 0 | 0 | 0 | 2 | 0 | 1 | 1 | hsa-miR-647 | -0.27 | N/A | Sites in UTR |
| BTN3A3  | NM_001242803 | butyrophilin, subfamily 3, member A3                      | 0 | 0 | 0 | 0 | 1 | 0 | 1 | 0 | hsa-miR-647 | -0.27 | N/A | Sites in UTR |
| KCTD4   | NM_198404    | potassium channel tetramerisation domain containing 4     | 1 | 0 | 1 | 0 | 0 | 0 | 0 | 0 | hsa-miR-647 | -0.27 | N/A | Sites in UTR |
| INPP5K  | NM_001135642 | inositol polyphosphate-5-phosphatase K                    | 0 | 0 | 0 | 0 | 2 | 0 | 1 | 1 | hsa-miR-647 | -0.27 | N/A | Sites in UTR |
| LRRC46  | NM_033413    | leucine rich repeat containing 46                         | 0 | 0 | 0 | 0 | 2 | 0 | 2 | 0 | hsa-miR-647 | -0.27 | N/A | Sites in UTR |
| DZIP1   | NM_014934    | DAZ interacting protein 1                                 | 0 | 0 | 0 | 0 | 1 | 0 | 1 | 0 | hsa-miR-647 | -0.27 | N/A | Sites in UTR |
| KIF4A   | NM_012310    | kinesin family member 4A                                  | 0 | 0 | 0 | 0 | 1 | 0 | 1 | 0 | hsa-miR-647 | -0.27 | N/A | Sites in UTR |
| SOSTDC1 | NM_015464    | sclerostin domain containing 1                            | 0 | 0 | 0 | 0 | 1 | 0 | 1 | 0 | hsa-miR-647 | -0.27 | N/A | Sites in UTR |
| UNC80   | NM_032504    | unc-80 homolog (C. elegans)                               | 0 | 0 | 0 | 0 | 1 | 0 | 1 | 0 | hsa-miR-647 | -0.27 | N/A | Sites in UTR |
| TMEM212 | NM_001164436 | transmembrane protein 212                                 | 0 | 0 | 0 | 0 | 1 | 0 | 1 | 0 | hsa-miR-647 | -0.27 | N/A | Sites in UTR |
| HIF3A   | NM_022462    | hypoxia inducible factor 3, alpha subunit                 | 1 | 1 | 0 | 0 | 0 | 0 | 0 | 0 | hsa-miR-647 | -0.27 | N/A | Sites in UTR |
| TMEM201 | NM_001130924 | transmembrane protein 201                                 | 0 | 0 | 0 | 0 | 1 | 1 | 0 | 0 | hsa-miR-647 | -0.27 | N/A | Sites in UTR |
| SPRN    | NM_001012508 | shadow of prion protein homolog (zebrafish)               | 0 | 0 | 0 | 0 | 3 | 0 | 1 | 2 | hsa-miR-647 | -0.27 | N/A | Sites in UTR |
| CHRNA4  | NM_000751    | cholinergic receptor, nicotinic, delta                    | 0 | 0 | 0 | 0 | 1 | 0 | 1 | 0 | hsa-miR-647 | -0.27 | N/A | Sites in UTR |
| VPS4A   | NM_013245    | vacuolar protein sorting 4 homolog A (S. cerevisiae)      | 0 | 0 | 0 | 0 | 1 | 0 | 1 | 0 | hsa-miR-647 | -0.27 | N/A | Sites in UTR |
| NR2E3   | NM_016346    | nuclear receptor subfamily 2, group E, member 3           | 0 | 0 | 0 | 0 | 2 | 0 | 0 | 2 | hsa-miR-647 | -0.27 | N/A | Sites in UTR |
| RCC1    | NM_001048194 | regulator of chromosome condensation 1                    | 1 | 1 | 0 | 0 | 0 | 0 | 0 | 0 | hsa-miR-647 | -0.27 | N/A | Sites in UTR |
| PRKAR2B | NM_002736    | protein kinase, cAMP-dependent, regulatory, type II, beta | 0 | 0 | 0 | 0 | 1 | 1 | 0 | 0 | hsa-miR-647 | -0.27 | N/A | Sites in UTR |

|         |              |                                                                 |   |   |   |   |   |   |   |   |             |       |     |              |
|---------|--------------|-----------------------------------------------------------------|---|---|---|---|---|---|---|---|-------------|-------|-----|--------------|
| CALN1   | NM_001017440 | calneuron 1                                                     | 0 | 0 | 0 | 0 | 2 | 1 | 1 | 0 | hsa-miR-647 | -0.26 | N/A | Sites in UTR |
| UBE4A   | NM_001204077 | ubiquitination factor E4A                                       | 1 | 0 | 1 | 0 | 0 | 0 | 0 | 0 | hsa-miR-647 | -0.26 | N/A | Sites in UTR |
| FAM78B  | NM_001017961 | family with sequence similarity 78, member B                    | 0 | 0 | 0 | 0 | 1 | 0 | 1 | 0 | hsa-miR-647 | -0.26 | N/A | Sites in UTR |
| SOX9    | NM_000346    | SRX (sex determining region Y)-box 9                            | 0 | 0 | 0 | 0 | 1 | 1 | 0 | 0 | hsa-miR-647 | -0.26 | N/A | Sites in UTR |
| ASCL1   | NM_004316    | achaete-scute complex homolog 1 (Drosophila)                    | 0 | 0 | 0 | 0 | 1 | 0 | 1 | 0 | hsa-miR-647 | -0.26 | N/A | Sites in UTR |
| ORC4    | NM_001190879 | origin recognition complex, subunit 4                           | 0 | 0 | 0 | 0 | 1 | 0 | 1 | 0 | hsa-miR-647 | -0.26 | N/A | Sites in UTR |
| SLC19A2 | NM_006996    | solute carrier family 19 (thiamine transporter), member 2       | 0 | 0 | 0 | 0 | 1 | 0 | 1 | 0 | hsa-miR-647 | -0.26 | N/A | Sites in UTR |
| FHDC1   | NM_033393    | FH2 domain containing 1                                         | 0 | 0 | 0 | 0 | 1 | 0 | 1 | 0 | hsa-miR-647 | -0.26 | N/A | Sites in UTR |
| TSPAN11 | NM_001080509 | tetraspanin 11                                                  | 0 | 0 | 0 | 0 | 2 | 0 | 2 | 0 | hsa-miR-647 | -0.26 | N/A | Sites in UTR |
| ENOSF1  | NM_001126123 | enolase superfamily member 1                                    | 1 | 1 | 0 | 0 | 0 | 0 | 0 | 0 | hsa-miR-647 | -0.26 | N/A | Sites in UTR |
| STMN3   | NM_015894    | stathmin-like 3                                                 | 0 | 0 | 0 | 0 | 2 | 0 | 2 | 0 | hsa-miR-647 | -0.26 | N/A | Sites in UTR |
| MYOZ3   | NM_001122853 | myozenin 3                                                      | 0 | 0 | 0 | 0 | 1 | 0 | 1 | 0 | hsa-miR-647 | -0.26 | N/A | Sites in UTR |
| KNDC1   | NM_152643    | kinase non-catalytic C-lobe domain (KIND) containing 1          | 0 | 0 | 0 | 0 | 2 | 0 | 2 | 0 | hsa-miR-647 | -0.26 | N/A | Sites in UTR |
| LMLN    | NM_001136049 | leishmanolysin-like (metallopeptidase M8 family)                | 0 | 0 | 0 | 0 | 2 | 0 | 1 | 1 | hsa-miR-647 | -0.26 | N/A | Sites in UTR |
| APBA1   | NM_001163    | amyloid beta (A4) precursor protein-binding, family A, member 1 | 0 | 0 | 0 | 0 | 2 | 0 | 2 | 0 | hsa-miR-647 | -0.26 | N/A | Sites in UTR |
| LRRCS9  | NM_018509    | leucine rich repeat containing 59                               | 0 | 0 | 0 | 0 | 1 | 0 | 1 | 0 | hsa-miR-647 | -0.26 | N/A | Sites in UTR |
| ZZEF1   | NM_015113    | zinc finger, ZZ-type with EF-hand domain 1                      | 0 | 0 | 0 | 0 | 2 | 0 | 1 | 1 | hsa-miR-647 | -0.26 | N/A | Sites in UTR |
| MBNL3   | NM_001170701 | muscleblind-like 3 (Drosophila)                                 | 0 | 0 | 0 | 0 | 3 | 0 | 2 | 1 | hsa-miR-647 | -0.26 | N/A | Sites in UTR |

|         |              |                                                                                         |   |   |   |   |   |   |   |   |             |       |     |              |
|---------|--------------|-----------------------------------------------------------------------------------------|---|---|---|---|---|---|---|---|-------------|-------|-----|--------------|
| RLF     | NM_012421    | rearranged L-myc fusion                                                                 | 0 | 0 | 0 | 0 | 1 | 0 | 1 | 0 | hsa-miR-647 | -0.26 | N/A | Sites in UTR |
| SPOP    | NM_001007226 | speckle-type POZ protein                                                                | 0 | 0 | 0 | 0 | 1 | 0 | 1 | 0 | hsa-miR-647 | -0.26 | N/A | Sites in UTR |
| SNAP29  | NM_004782    | synaptosomal-associated protein, 29kDa                                                  | 0 | 0 | 0 | 0 | 1 | 0 | 1 | 0 | hsa-miR-647 | -0.26 | N/A | Sites in UTR |
| ART5    | NM_001079536 | ADP-ribosyltransferase 5                                                                | 0 | 0 | 0 | 0 | 1 | 0 | 1 | 0 | hsa-miR-647 | -0.26 | N/A | Sites in UTR |
| FBLN7   | NM_001128165 | fibulin 7                                                                               | 0 | 0 | 0 | 0 | 1 | 0 | 1 | 0 | hsa-miR-647 | -0.26 | N/A | Sites in UTR |
| BBS12   | NM_001178007 | Bardet-Biedl syndrome 12                                                                | 0 | 0 | 0 | 0 | 1 | 0 | 1 | 0 | hsa-miR-647 | -0.26 | N/A | Sites in UTR |
| KRTCAP3 | NM_001168364 | keratinocyte associated protein 3                                                       | 0 | 0 | 0 | 0 | 1 | 0 | 1 | 0 | hsa-miR-647 | -0.26 | N/A | Sites in UTR |
| JAM3    | NM_001205329 | junctional adhesion molecule 3                                                          | 0 | 0 | 0 | 0 | 2 | 0 | 2 | 0 | hsa-miR-647 | -0.26 | N/A | Sites in UTR |
| EGR4    | NM_001965    | early growth response 4                                                                 | 0 | 0 | 0 | 0 | 1 | 0 | 1 | 0 | hsa-miR-647 | -0.26 | N/A | Sites in UTR |
| GRK5    | NM_005308    | G protein-coupled receptor kinase 5                                                     | 0 | 0 | 0 | 0 | 1 | 0 | 1 | 0 | hsa-miR-647 | -0.26 | N/A | Sites in UTR |
| TLK2    | NM_001112707 | tousled-like kinase 2                                                                   | 0 | 0 | 0 | 0 | 1 | 0 | 1 | 0 | hsa-miR-647 | -0.26 | N/A | Sites in UTR |
| TMCO1   | NM_019026    | transmembrane and coiled-coil domains 1                                                 | 0 | 0 | 0 | 0 | 1 | 0 | 1 | 0 | hsa-miR-647 | -0.26 | N/A | Sites in UTR |
| PPDPF   | NM_024299    | pancreatic progenitor cell differentiation and proliferation factor homolog (zebrafish) | 1 | 0 | 1 | 0 | 0 | 0 | 0 | 0 | hsa-miR-647 | -0.26 | N/A | Sites in UTR |
| MAP3K9  | NM_033141    | mitogen-activated protein kinase kinase kinase 9                                        | 2 | 0 | 0 | 2 | 0 | 0 | 0 | 0 | hsa-miR-647 | -0.26 | N/A | Sites in UTR |
| RGS19   | NM_001039467 | regulator of G-protein signaling 19                                                     | 0 | 0 | 0 | 0 | 1 | 1 | 0 | 0 | hsa-miR-647 | -0.26 | N/A | Sites in UTR |
| NPY     | NM_000905    | neuropeptide Y                                                                          | 0 | 0 | 0 | 0 | 1 | 0 | 1 | 0 | hsa-miR-647 | -0.26 | N/A | Sites in UTR |
| UNG     | NM_003362    | uracil-DNA glycosylase                                                                  | 0 | 0 | 0 | 0 | 1 | 0 | 1 | 0 | hsa-miR-647 | -0.26 | N/A | Sites in UTR |
| AWAT2   | NM_001002254 | acyl-CoA wax alcohol acyltransferase 2                                                  | 0 | 0 | 0 | 0 | 1 | 0 | 1 | 0 | hsa-miR-647 | -0.26 | N/A | Sites in UTR |

|          |              |                                                                                                      |   |   |   |   |   |   |   |   |             |       |     |              |
|----------|--------------|------------------------------------------------------------------------------------------------------|---|---|---|---|---|---|---|---|-------------|-------|-----|--------------|
| PP1L1    | NM_016059    | peptidylprolyl isomerase (cyclophilin)-like 1                                                        | 0 | 0 | 0 | 0 | 1 | 0 | 1 | 0 | hsa-miR-647 | -0.26 | N/A | Sites in UTR |
| RBM4     | NM_001198844 | RNA binding motif protein 4                                                                          | 0 | 0 | 0 | 0 | 1 | 0 | 1 | 0 | hsa-miR-647 | -0.26 | N/A | Sites in UTR |
| LHX9     | NM_001014434 | LIM homeobox 9                                                                                       | 1 | 0 | 1 | 0 | 0 | 0 | 0 | 0 | hsa-miR-647 | -0.26 | N/A | Sites in UTR |
| FUNDC2   | NM_023934    | FUN14 domain containing 2                                                                            | 0 | 0 | 0 | 0 | 1 | 0 | 1 | 0 | hsa-miR-647 | -0.26 | N/A | Sites in UTR |
| SEC14L1  | NM_001039573 | SEC14-like 1 ( <i>S. cerevisiae</i> )                                                                | 0 | 0 | 0 | 0 | 1 | 0 | 1 | 0 | hsa-miR-647 | -0.26 | N/A | Sites in UTR |
| MTHFD2   | NM_006636    | methylenetetrahydrofolate dehydrogenase (NADP+ dependent) 2, methenyltetrahydrofolate cyclohydrolase | 0 | 0 | 0 | 0 | 1 | 0 | 1 | 0 | hsa-miR-647 | -0.26 | N/A | Sites in UTR |
| TCTN3    | NM_001143973 | tectonic family member 3                                                                             | 0 | 0 | 0 | 0 | 1 | 0 | 1 | 0 | hsa-miR-647 | -0.26 | N/A | Sites in UTR |
| SLC39A8  | NM_001135147 | solute carrier family 39 (zinc transporter), member 8                                                | 0 | 0 | 0 | 0 | 1 | 0 | 1 | 0 | hsa-miR-647 | -0.26 | N/A | Sites in UTR |
| ENO4     | NM_001242699 | enolase family member 4                                                                              | 0 | 0 | 0 | 0 | 1 | 0 | 1 | 0 | hsa-miR-647 | -0.26 | N/A | Sites in UTR |
| CBX5     | NM_001127321 | chromobox homolog 5                                                                                  | 1 | 0 | 0 | 1 | 1 | 0 | 1 | 0 | hsa-miR-647 | -0.26 | N/A | Sites in UTR |
| CLEC2D   | NM_001004419 | C-type lectin domain family 2, member D                                                              | 0 | 0 | 0 | 0 | 3 | 0 | 1 | 2 | hsa-miR-647 | -0.26 | N/A | Sites in UTR |
| TIGD3    | NM_145719    | tigger transposable element derived 3                                                                | 0 | 0 | 0 | 0 | 1 | 0 | 1 | 0 | hsa-miR-647 | -0.25 | N/A | Sites in UTR |
| CORO1C   | NM_014325    | coronin, actin binding protein, 1C                                                                   | 0 | 0 | 0 | 0 | 2 | 0 | 0 | 2 | hsa-miR-647 | -0.25 | N/A | Sites in UTR |
| LSM12    | NM_152344    | LSM12 homolog ( <i>S. cerevisiae</i> )                                                               | 0 | 0 | 0 | 0 | 2 | 0 | 0 | 2 | hsa-miR-647 | -0.25 | N/A | Sites in UTR |
| ITPRIPL2 | NM_001034841 | inositol 1,4,5-trisphosphate receptor interacting protein-like 2                                     | 0 | 0 | 0 | 0 | 2 | 0 | 2 | 0 | hsa-miR-647 | -0.25 | N/A | Sites in UTR |
| ENG      | NM_000118    | endoglin                                                                                             | 0 | 0 | 0 | 0 | 2 | 0 | 2 | 0 | hsa-miR-647 | -0.25 | N/A | Sites in UTR |
| ATF7IP2  | NM_024997    | activating transcription factor 7 interacting protein 2                                              | 1 | 0 | 1 | 0 | 0 | 0 | 0 | 0 | hsa-miR-647 | -0.25 | N/A | Sites in UTR |
| SLC35A4  | NM_080670    | solute carrier family 35, member A4                                                                  | 0 | 0 | 0 | 0 | 1 | 0 | 1 | 0 | hsa-miR-647 | -0.25 | N/A | Sites in UTR |

|          |              |                                                             |   |   |   |   |   |   |   |   |             |       |     |              |
|----------|--------------|-------------------------------------------------------------|---|---|---|---|---|---|---|---|-------------|-------|-----|--------------|
| SLC22A23 | NM_015482    | solute carrier family 22, member 23                         | 0 | 0 | 0 | 0 | 2 | 0 | 1 | 1 | hsa-miR-647 | -0.25 | N/A | Sites in UTR |
| ADORA3   | NM_001081976 | adenosine A3 receptor                                       | 0 | 0 | 0 | 0 | 1 | 0 | 1 | 0 | hsa-miR-647 | -0.25 | N/A | Sites in UTR |
| SLC35A5  | NM_017945    | solute carrier family 35, member A5                         | 0 | 0 | 0 | 0 | 1 | 0 | 1 | 0 | hsa-miR-647 | -0.25 | N/A | Sites in UTR |
| POLR2J3  | NM_001097615 | polymerase (RNA) II (DNA directed) polypeptide J3           | 0 | 0 | 0 | 0 | 1 | 0 | 1 | 0 | hsa-miR-647 | -0.25 | N/A | Sites in UTR |
| CYR61    | NM_001554    | cysteine-rich, angiogenic inducer, 61                       | 0 | 0 | 0 | 0 | 1 | 0 | 1 | 0 | hsa-miR-647 | -0.25 | N/A | Sites in UTR |
| SLCO2B1  | NM_001145211 | solute carrier organic anion transporter family, member 2B1 | 0 | 0 | 0 | 0 | 1 | 0 | 1 | 0 | hsa-miR-647 | -0.25 | N/A | Sites in UTR |
| JUB      | NM_032876    | jub, ajuba homolog ( <i>Xenopus laevis</i> )                | 0 | 0 | 0 | 0 | 2 | 0 | 0 | 2 | hsa-miR-647 | -0.25 | N/A | Sites in UTR |
| STK24    | NM_001032296 | serine/threonine kinase 24                                  | 0 | 0 | 0 | 0 | 2 | 0 | 2 | 0 | hsa-miR-647 | -0.25 | N/A | Sites in UTR |
| CEACAM7  | NM_006890    | carcinoembryonic antigen-related cell adhesion molecule 7   | 0 | 0 | 0 | 0 | 1 | 0 | 1 | 0 | hsa-miR-647 | -0.25 | N/A | Sites in UTR |
| GDPD1    | NM_001165993 | glycerophosphodiester phosphodiesterase domain containing 1 | 0 | 0 | 0 | 0 | 1 | 0 | 1 | 0 | hsa-miR-647 | -0.25 | N/A | Sites in UTR |
| FOXJ1    | NM_001454    | forkhead box J1                                             | 1 | 1 | 0 | 0 | 0 | 0 | 0 | 0 | hsa-miR-647 | -0.25 | N/A | Sites in UTR |
| GLT25D1  | NM_024656    | glycosyltransferase 25 domain containing 1                  | 0 | 0 | 0 | 0 | 2 | 0 | 2 | 0 | hsa-miR-647 | -0.25 | N/A | Sites in UTR |
| MAGT1    | NM_032121    | magnesium transporter 1                                     | 0 | 0 | 0 | 0 | 1 | 0 | 1 | 0 | hsa-miR-647 | -0.25 | N/A | Sites in UTR |
| SH3KBP1  | NM_001024666 | SH3-domain kinase binding protein 1                         | 1 | 0 | 0 | 1 | 1 | 0 | 0 | 1 | hsa-miR-647 | -0.25 | N/A | Sites in UTR |
| DUSP16   | NM_030640    | dual specificity phosphatase 16                             | 0 | 0 | 0 | 0 | 2 | 0 | 1 | 1 | hsa-miR-647 | -0.25 | N/A | Sites in UTR |
| KCNT1    | NM_020822    | potassium channel, subfamily T, member 1                    | 0 | 0 | 0 | 0 | 1 | 1 | 0 | 0 | hsa-miR-647 | -0.25 | N/A | Sites in UTR |
| LMF1     | NM_022773    | lipase maturation factor 1                                  | 0 | 0 | 0 | 0 | 1 | 1 | 0 | 0 | hsa-miR-647 | -0.25 | N/A | Sites in UTR |
| CD84     | NM_001184879 | CD84 molecule                                               | 0 | 0 | 0 | 0 | 2 | 0 | 1 | 1 | hsa-miR-647 | -0.25 | N/A | Sites in UTR |

|          |              |                                                                            |   |   |   |   |   |   |   |   |             |       |     |              |
|----------|--------------|----------------------------------------------------------------------------|---|---|---|---|---|---|---|---|-------------|-------|-----|--------------|
| RAB3B    | NM_002867    | RAB3B, member RAS oncogene family                                          | 0 | 0 | 0 | 0 | 2 | 1 | 1 | 0 | hsa-miR-647 | -0.25 | N/A | Sites in UTR |
| C17orf72 | NM_001164257 | chromosome 17 open reading frame 72                                        | 0 | 0 | 0 | 0 | 3 | 0 | 1 | 2 | hsa-miR-647 | -0.25 | N/A | Sites in UTR |
| SLC35E2B | NM_001110781 | solute carrier family 35, member E2B                                       | 0 | 0 | 0 | 0 | 3 | 0 | 1 | 2 | hsa-miR-647 | -0.25 | N/A | Sites in UTR |
| CRCP     | NM_001040647 | CGRP receptor component                                                    | 1 | 0 | 1 | 0 | 0 | 0 | 0 | 0 | hsa-miR-647 | -0.25 | N/A | Sites in UTR |
| SVEP1    | NM_153366    | sushi, von Willebrand factor type A, EGF and pentraxin domain containing 1 | 0 | 0 | 0 | 0 | 1 | 0 | 1 | 0 | hsa-miR-647 | -0.25 | N/A | Sites in UTR |
| ANKS6    | NM_173551    | ankyrin repeat and sterile alpha motif domain containing 6                 | 0 | 0 | 0 | 0 | 2 | 0 | 2 | 0 | hsa-miR-647 | -0.25 | N/A | Sites in UTR |
| RAB15    | NM_198686    | RAB15, member RAS oncogene family                                          | 0 | 0 | 0 | 0 | 1 | 1 | 0 | 0 | hsa-miR-647 | -0.25 | N/A | Sites in UTR |
| SOST     | NM_025237    | sclerostin                                                                 | 0 | 0 | 0 | 0 | 2 | 0 | 1 | 1 | hsa-miR-647 | -0.25 | N/A | Sites in UTR |
| APBA2    | NM_001130414 | amyloid beta (A4) precursor protein-binding, family A, member 2            | 0 | 0 | 0 | 0 | 2 | 0 | 2 | 0 | hsa-miR-647 | -0.25 | N/A | Sites in UTR |
| ZNF75A   | NM_153028    | zinc finger protein 75a                                                    | 0 | 0 | 0 | 0 | 1 | 0 | 1 | 0 | hsa-miR-647 | -0.25 | N/A | Sites in UTR |
| C3orf23  | NM_173826    | chromosome 3 open reading frame 23                                         | 1 | 0 | 1 | 0 | 0 | 0 | 0 | 0 | hsa-miR-647 | -0.25 | N/A | Sites in UTR |
| FADS2    | NM_004265    | fatty acid desaturase 2                                                    | 0 | 0 | 0 | 0 | 2 | 0 | 1 | 1 | hsa-miR-647 | -0.25 | N/A | Sites in UTR |
| BICD2    | NM_001003800 | bicaudal D homolog 2 (Drosophila)                                          | 0 | 0 | 0 | 0 | 1 | 1 | 0 | 0 | hsa-miR-647 | -0.25 | N/A | Sites in UTR |
| ASB13    | NM_024701    | ankyrin repeat and SOCS box containing 13                                  | 0 | 0 | 0 | 0 | 1 | 1 | 0 | 0 | hsa-miR-647 | -0.25 | N/A | Sites in UTR |
| ARNT2    | NM_014862    | aryl-hydrocarbon receptor nuclear translocator 2                           | 0 | 0 | 0 | 0 | 2 | 0 | 1 | 1 | hsa-miR-647 | -0.25 | N/A | Sites in UTR |
| BTN3A2   | NM_001197246 | butyrophilin, subfamily 3, member A2                                       | 0 | 0 | 0 | 0 | 1 | 0 | 1 | 0 | hsa-miR-647 | -0.25 | N/A | Sites in UTR |
| MPND     | NM_001159846 | MPN domain containing                                                      | 0 | 0 | 0 | 0 | 1 | 0 | 1 | 0 | hsa-miR-647 | -0.25 | N/A | Sites in UTR |
| LIX1     | NM_153234    | Lix1 homolog (chicken)                                                     | 1 | 0 | 1 | 0 | 0 | 0 | 0 | 0 | hsa-miR-647 | -0.25 | N/A | Sites in UTR |



|          |              |                                                                |   |   |   |   |   |   |   |   |             |       |     |              |
|----------|--------------|----------------------------------------------------------------|---|---|---|---|---|---|---|---|-------------|-------|-----|--------------|
| ZC3H7B   | NM_017590    | zinc finger CCCH-type containing 7B                            | 1 | 0 | 1 | 0 | 1 | 0 | 1 | 0 | hsa-miR-647 | -0.25 | N/A | Sites in UTR |
| ZCCHC2   | NM_017742    | zinc finger, CCHC domain containing 2                          | 0 | 0 | 0 | 0 | 2 | 0 | 1 | 1 | hsa-miR-647 | -0.25 | N/A | Sites in UTR |
| GALC     | NM_000153    | galactosylceramidase                                           | 0 | 0 | 0 | 0 | 1 | 0 | 1 | 0 | hsa-miR-647 | -0.24 | N/A | Sites in UTR |
| PTPN12   | NM_001131008 | protein tyrosine phosphatase, non-receptor type 12             | 0 | 0 | 0 | 0 | 1 | 0 | 1 | 0 | hsa-miR-647 | -0.24 | N/A | Sites in UTR |
| INF2     | NM_032714    | inverted formin, FH2 and WH2 domain containing                 | 0 | 0 | 0 | 0 | 1 | 0 | 1 | 0 | hsa-miR-647 | -0.24 | N/A | Sites in UTR |
| FAM124A  | NM_001242312 | family with sequence similarity 124A                           | 0 | 0 | 0 | 0 | 2 | 0 | 1 | 1 | hsa-miR-647 | -0.24 | N/A | Sites in UTR |
| P2RY8    | NM_178129    | purinergic receptor P2Y, G-protein coupled, 8                  | 0 | 0 | 0 | 0 | 1 | 0 | 1 | 0 | hsa-miR-647 | -0.24 | N/A | Sites in UTR |
| TGFA     | NM_001099691 | transforming growth factor, alpha                              | 0 | 0 | 0 | 0 | 1 | 1 | 0 | 0 | hsa-miR-647 | -0.24 | N/A | Sites in UTR |
| ARHGDI1  | NM_001185077 | Rho GDP dissociation inhibitor (GDI) alpha                     | 0 | 0 | 0 | 0 | 2 | 0 | 2 | 0 | hsa-miR-647 | -0.24 | N/A | Sites in UTR |
| FBXO32   | NM_001242463 | F-box protein 32                                               | 0 | 0 | 0 | 0 | 3 | 0 | 1 | 2 | hsa-miR-647 | -0.24 | N/A | Sites in UTR |
| FOXF1    | NM_001451    | forkhead box F1                                                | 0 | 0 | 0 | 0 | 1 | 0 | 1 | 0 | hsa-miR-647 | -0.24 | N/A | Sites in UTR |
| HLA-DQB2 | NM_001198858 | major histocompatibility complex, class II, DQ beta 2          | 0 | 0 | 0 | 0 | 1 | 0 | 1 | 0 | hsa-miR-647 | -0.24 | N/A | Sites in UTR |
| CUL4B    | NM_001079872 | cullin 4B                                                      | 0 | 0 | 0 | 0 | 1 | 0 | 1 | 0 | hsa-miR-647 | -0.24 | N/A | Sites in UTR |
| ABI3     | NM_001135186 | ABI family, member 3                                           | 0 | 0 | 0 | 0 | 1 | 0 | 1 | 0 | hsa-miR-647 | -0.24 | N/A | Sites in UTR |
| ZCCHC10  | NM_017665    | zinc finger, CCHC domain containing 10                         | 0 | 0 | 0 | 0 | 1 | 0 | 1 | 0 | hsa-miR-647 | -0.24 | N/A | Sites in UTR |
| ERGIC1   | NM_001031711 | endoplasmic reticulum-golgi intermediate compartment (ERGIC) 1 | 0 | 0 | 0 | 0 | 1 | 1 | 0 | 0 | hsa-miR-647 | -0.24 | N/A | Sites in UTR |
| CDC42BPB | NM_006035    | CDC42 binding protein kinase beta (DMPK-like)                  | 0 | 0 | 0 | 0 | 2 | 0 | 2 | 0 | hsa-miR-647 | -0.24 | N/A | Sites in UTR |
| CDC42    | NM_001039802 | cell division cycle 42 (GTP binding protein, 25kDa)            | 0 | 0 | 0 | 0 | 1 | 0 | 1 | 0 | hsa-miR-647 | -0.24 | N/A | Sites in UTR |

|          |              |                                                                                 |   |   |   |   |   |   |   |   |             |       |     |              |
|----------|--------------|---------------------------------------------------------------------------------|---|---|---|---|---|---|---|---|-------------|-------|-----|--------------|
| KHSRP    | NM_003685    | KH-type splicing regulatory protein                                             | 0 | 0 | 0 | 0 | 1 | 1 | 0 | 0 | hsa-miR-647 | -0.24 | N/A | Sites in UTR |
| SEMA6C   | NM_001178061 | sema domain, transmembrane domain (TM), and cytoplasmic domain, (semaphorin) 6C | 0 | 0 | 0 | 0 | 2 | 0 | 1 | 1 | hsa-miR-647 | -0.24 | N/A | Sites in UTR |
| OAS3     | NM_006187    | 2'-5'-oligoadenylate synthetase 3, 100kDa                                       | 0 | 0 | 0 | 0 | 2 | 0 | 2 | 0 | hsa-miR-647 | -0.24 | N/A | Sites in UTR |
| PPIF     | NM_005729    | peptidylprolyl isomerase F                                                      | 0 | 0 | 0 | 0 | 2 | 0 | 0 | 2 | hsa-miR-647 | -0.24 | N/A | Sites in UTR |
| CIT      | NM_001206999 | citron (rho-interacting, serine/threonine kinase 21)                            | 0 | 0 | 0 | 0 | 1 | 1 | 0 | 0 | hsa-miR-647 | -0.24 | N/A | Sites in UTR |
| TRIM50   | NM_178125    | tripartite motif containing 50                                                  | 0 | 0 | 0 | 0 | 2 | 0 | 1 | 1 | hsa-miR-647 | -0.24 | N/A | Sites in UTR |
| TGM4     | NM_003241    | transglutaminase 4 (prostate)                                                   | 0 | 0 | 0 | 0 | 1 | 0 | 1 | 0 | hsa-miR-647 | -0.24 | N/A | Sites in UTR |
| MAGED2   | NM_014599    | melanoma antigen family D, 2                                                    | 1 | 0 | 1 | 0 | 0 | 0 | 0 | 0 | hsa-miR-647 | -0.24 | N/A | Sites in UTR |
| ATP6V1D  | NM_015994    | ATPase, H+ transporting, lysosomal 34kDa, V1 subunit D                          | 0 | 0 | 0 | 0 | 1 | 0 | 1 | 0 | hsa-miR-647 | -0.24 | N/A | Sites in UTR |
| ZNF746   | NM_001163474 | zinc finger protein 746                                                         | 0 | 0 | 0 | 0 | 1 | 0 | 1 | 0 | hsa-miR-647 | -0.24 | N/A | Sites in UTR |
| SPTBN1   | NM_003128    | spectrin, beta, non-erythrocytic 1                                              | 0 | 0 | 0 | 0 | 2 | 0 | 2 | 0 | hsa-miR-647 | -0.24 | N/A | Sites in UTR |
| ATOH8    | NM_032827    | atonal homolog 8 (Drosophila)                                                   | 0 | 0 | 0 | 0 | 4 | 0 | 3 | 1 | hsa-miR-647 | -0.24 | N/A | Sites in UTR |
| RALGPS2  | NM_152663    | Ral GEF with PH domain and SH3 binding motif 2                                  | 0 | 0 | 0 | 0 | 1 | 0 | 0 | 1 | hsa-miR-647 | -0.24 | N/A | Sites in UTR |
| XPNPEP2  | NM_003399    | X-prolyl aminopeptidase (aminopeptidase P) 2, membrane-bound                    | 0 | 0 | 0 | 0 | 1 | 0 | 1 | 0 | hsa-miR-647 | -0.24 | N/A | Sites in UTR |
| IKBKG    | NM_001099856 | inhibitor of kappa light polypeptide gene enhancer in B-cells, kinase gamma     | 0 | 0 | 0 | 0 | 1 | 0 | 1 | 0 | hsa-miR-647 | -0.24 | N/A | Sites in UTR |
| TNFSF10  | NM_001190942 | tumor necrosis factor (ligand) superfamily, member 10                           | 0 | 0 | 0 | 0 | 1 | 0 | 1 | 0 | hsa-miR-647 | -0.24 | N/A | Sites in UTR |
| IFIT5    | NM_012420    | interferon-induced protein with tetratricopeptide repeats 5                     | 0 | 0 | 0 | 0 | 1 | 0 | 1 | 0 | hsa-miR-647 | -0.24 | N/A | Sites in UTR |
| RNASEH2C | NM_032193    | ribonuclease H2, subunit C                                                      | 0 | 0 | 0 | 0 | 1 | 0 | 1 | 0 | hsa-miR-647 | -0.24 | N/A | Sites in UTR |

|          |              |                                                                       |   |   |   |   |   |   |   |   |   |             |       |     |              |
|----------|--------------|-----------------------------------------------------------------------|---|---|---|---|---|---|---|---|---|-------------|-------|-----|--------------|
| CDRT4    | NM_001204477 | CMT1A duplicated region transcript 4                                  | 1 | 0 | 1 | 0 | 0 | 0 | 0 | 0 | 0 | hsa-miR-647 | -0.24 | N/A | Sites in UTR |
| GRIK3    | NM_000831    | glutamate receptor, ionotropic, kainate 3                             | 0 | 0 | 0 | 0 | 2 | 0 | 1 | 1 | 1 | hsa-miR-647 | -0.24 | N/A | Sites in UTR |
| IL2RA    | NM_000417    | interleukin 2 receptor, alpha                                         | 0 | 0 | 0 | 0 | 1 | 1 | 0 | 0 | 0 | hsa-miR-647 | -0.24 | N/A | Sites in UTR |
| TANC1    | NM_001145909 | tetratricopeptide repeat, ankyrin repeat and coiled-coil containing 1 | 0 | 0 | 0 | 0 | 1 | 1 | 0 | 0 | 0 | hsa-miR-647 | -0.24 | N/A | Sites in UTR |
| LTBP2    | NM_000428    | latent transforming growth factor beta binding protein 2              | 0 | 0 | 0 | 0 | 2 | 0 | 1 | 1 | 1 | hsa-miR-647 | -0.24 | N/A | Sites in UTR |
| GLYCK    | NM_145262    | glycerate kinase                                                      | 0 | 0 | 0 | 0 | 2 | 0 | 2 | 0 | 0 | hsa-miR-647 | -0.24 | N/A | Sites in UTR |
| TBX15    | NM_152380    | T-box 15                                                              | 1 | 0 | 1 | 0 | 0 | 0 | 0 | 0 | 0 | hsa-miR-647 | -0.24 | N/A | Sites in UTR |
| ADAP2    | NM_018404    | ArfGAP with dual PH domains 2                                         | 1 | 0 | 1 | 0 | 0 | 0 | 0 | 0 | 0 | hsa-miR-647 | -0.24 | N/A | Sites in UTR |
| CHKA     | NM_001277    | choline kinase alpha                                                  | 0 | 0 | 0 | 0 | 1 | 1 | 0 | 0 | 0 | hsa-miR-647 | -0.24 | N/A | Sites in UTR |
| PLXNA2   | NM_025179    | plexin A2                                                             | 0 | 0 | 0 | 0 | 3 | 0 | 2 | 1 | 1 | hsa-miR-647 | -0.24 | N/A | Sites in UTR |
| CTSS     | NM_001199739 | cathepsin S                                                           | 0 | 0 | 0 | 0 | 1 | 0 | 1 | 0 | 0 | hsa-miR-647 | -0.24 | N/A | Sites in UTR |
| APH1B    | NM_001145646 | anterior pharynx defective 1 homolog B (C. elegans)                   | 0 | 0 | 0 | 0 | 1 | 0 | 1 | 0 | 0 | hsa-miR-647 | -0.24 | N/A | Sites in UTR |
| PBX1     | NM_001204961 | pre-B-cell leukemia homeobox 1                                        | 1 | 0 | 0 | 1 | 1 | 0 | 0 | 1 | 1 | hsa-miR-647 | -0.24 | N/A | Sites in UTR |
| RNF144B  | NM_182757    | ring finger protein 144B                                              | 0 | 0 | 0 | 0 | 2 | 0 | 0 | 2 | 2 | hsa-miR-647 | -0.24 | N/A | Sites in UTR |
| CPLX2    | NM_001008220 | complexin 2                                                           | 1 | 0 | 0 | 1 | 1 | 0 | 1 | 0 | 0 | hsa-miR-647 | -0.24 | N/A | Sites in UTR |
| CD177    | NM_020406    | CD177 molecule                                                        | 0 | 0 | 0 | 0 | 2 | 0 | 1 | 1 | 1 | hsa-miR-647 | -0.24 | N/A | Sites in UTR |
| KIAA0240 | NM_015349    | KIAA0240                                                              | 1 | 0 | 0 | 1 | 2 | 0 | 1 | 1 | 1 | hsa-miR-647 | -0.24 | N/A | Sites in UTR |
| ARHGEF40 | NM_018071    | Rho guanine nucleotide exchange factor (GEF) 40                       | 0 | 0 | 0 | 0 | 1 | 0 | 1 | 0 | 0 | hsa-miR-647 | -0.24 | N/A | Sites in UTR |

|          |              |                                                                               |   |   |   |   |   |   |   |   |             |       |     |              |
|----------|--------------|-------------------------------------------------------------------------------|---|---|---|---|---|---|---|---|-------------|-------|-----|--------------|
| GDAP1L1  | NM_024034    | ganglioside-induced differentiation-associated protein 1-like 1               | 0 | 0 | 0 | 0 | 1 | 0 | 1 | 0 | hsa-miR-647 | -0.24 | N/A | Sites in UTR |
| C1orf212 | NM_001164824 | chromosome 1 open reading frame 212                                           | 1 | 0 | 1 | 0 | 0 | 0 | 0 | 0 | hsa-miR-647 | -0.24 | N/A | Sites in UTR |
| SLAMF8   | NM_020125    | SLAM family member 8                                                          | 0 | 0 | 0 | 0 | 2 | 0 | 1 | 1 | hsa-miR-647 | -0.24 | N/A | Sites in UTR |
| ABCA4    | NM_000350    | ATP-binding cassette, sub-family A (ABC1), member 4                           | 0 | 0 | 0 | 0 | 1 | 0 | 1 | 0 | hsa-miR-647 | -0.23 | N/A | Sites in UTR |
| ZNF473   | NM_001006656 | zinc finger protein 473                                                       | 0 | 0 | 0 | 0 | 1 | 0 | 1 | 0 | hsa-miR-647 | -0.23 | N/A | Sites in UTR |
| ATP5S    | NM_001003803 | ATP synthase, H+ transporting, mitochondrial Fo complex, subunit s (factor B) | 0 | 0 | 0 | 0 | 1 | 0 | 1 | 0 | hsa-miR-647 | -0.23 | N/A | Sites in UTR |
| C17orf87 | NM_207103    | chromosome 17 open reading frame 87                                           | 0 | 0 | 0 | 0 | 1 | 0 | 1 | 0 | hsa-miR-647 | -0.23 | N/A | Sites in UTR |
| TTF2     | NM_003594    | transcription termination factor, RNA polymerase II                           | 0 | 0 | 0 | 0 | 2 | 0 | 2 | 0 | hsa-miR-647 | -0.23 | N/A | Sites in UTR |
| LANCL2   | NM_018697    | LanC lantibiotic synthetase component C-like 2 (bacterial)                    | 0 | 0 | 0 | 0 | 2 | 0 | 2 | 0 | hsa-miR-647 | -0.23 | N/A | Sites in UTR |
| PHC2     | NM_004427    | polyhomeotic homolog 2 (Drosophila)                                           | 0 | 0 | 0 | 0 | 3 | 0 | 3 | 0 | hsa-miR-647 | -0.23 | N/A | Sites in UTR |
| DPYSL2   | NM_001197293 | dihydropyrimidinase-like 2                                                    | 1 | 0 | 1 | 0 | 0 | 0 | 0 | 0 | hsa-miR-647 | -0.23 | N/A | Sites in UTR |
| BTN3A1   | NM_001145008 | butyrophilin, subfamily 3, member A1                                          | 0 | 0 | 0 | 0 | 1 | 0 | 1 | 0 | hsa-miR-647 | -0.23 | N/A | Sites in UTR |
| ZNF621   | NM_001098414 | zinc finger protein 621                                                       | 0 | 0 | 0 | 0 | 1 | 0 | 1 | 0 | hsa-miR-647 | -0.23 | N/A | Sites in UTR |
| EFS      | NM_005864    | embryonal Fyn-associated substrate                                            | 0 | 0 | 0 | 0 | 1 | 0 | 1 | 0 | hsa-miR-647 | -0.23 | N/A | Sites in UTR |
| GPR161   | NM_153832    | G protein-coupled receptor 161                                                | 0 | 0 | 0 | 0 | 1 | 0 | 1 | 0 | hsa-miR-647 | -0.23 | N/A | Sites in UTR |
| LINGO2   | NM_152570    | leucine rich repeat and Ig domain containing 2                                | 0 | 0 | 0 | 0 | 1 | 0 | 1 | 0 | hsa-miR-647 | -0.23 | N/A | Sites in UTR |
| ZNF662   | NM_001134656 | zinc finger protein 662                                                       | 0 | 0 | 0 | 0 | 1 | 0 | 1 | 0 | hsa-miR-647 | -0.23 | N/A | Sites in UTR |
| ADPRH    | NM_001125    | ADP-ribosylarginine hydrolase                                                 | 0 | 0 | 0 | 0 | 1 | 1 | 0 | 0 | hsa-miR-647 | -0.23 | N/A | Sites in UTR |

|          |              |                                                                          |   |   |   |   |   |   |   |   |             |       |     |              |
|----------|--------------|--------------------------------------------------------------------------|---|---|---|---|---|---|---|---|-------------|-------|-----|--------------|
| PKHD1    | NM_170724    | polycystic kidney and hepatic disease 1 (autosomal recessive)            | 0 | 0 | 0 | 0 | 1 | 0 | 1 | 0 | hsa-miR-647 | -0.23 | N/A | Sites in UTR |
| SLC5A6   | NM_021095    | solute carrier family 5 (sodium-dependent vitamin transporter), member 6 | 0 | 0 | 0 | 0 | 1 | 0 | 1 | 0 | hsa-miR-647 | -0.23 | N/A | Sites in UTR |
| DVL3     | NM_004423    | dishevelled, dsh homolog 3 (Drosophila)                                  | 1 | 1 | 0 | 0 | 0 | 0 | 0 | 0 | hsa-miR-647 | -0.23 | N/A | Sites in UTR |
| MINK1    | NM_001024937 | misshapen-like kinase 1                                                  | 1 | 0 | 0 | 1 | 1 | 0 | 1 | 0 | hsa-miR-647 | -0.23 | N/A | Sites in UTR |
| CD101    | NM_004258    | CD101 molecule                                                           | 0 | 0 | 0 | 0 | 1 | 0 | 1 | 0 | hsa-miR-647 | -0.23 | N/A | Sites in UTR |
| ARMC8    | NM_015396    | armadillo repeat containing 8                                            | 1 | 0 | 1 | 0 | 0 | 0 | 0 | 0 | hsa-miR-647 | -0.23 | N/A | Sites in UTR |
| ZNF671   | NM_024833    | zinc finger protein 671                                                  | 0 | 0 | 0 | 0 | 1 | 0 | 1 | 0 | hsa-miR-647 | -0.23 | N/A | Sites in UTR |
| KIAA1267 | NM_001193465 | KIAA1267                                                                 | 0 | 0 | 0 | 0 | 1 | 0 | 1 | 0 | hsa-miR-647 | -0.23 | N/A | Sites in UTR |
| CDV3     | NM_001134422 | CDV3 homolog (mouse)                                                     | 0 | 0 | 0 | 0 | 2 | 0 | 1 | 1 | hsa-miR-647 | -0.23 | N/A | Sites in UTR |
| UBXN2B   | NM_001077619 | UBX domain protein 2B                                                    | 0 | 0 | 0 | 0 | 1 | 0 | 0 | 1 | hsa-miR-647 | -0.23 | N/A | Sites in UTR |
| LAMP2    | NM_013995    | lysosomal-associated membrane protein 2                                  | 0 | 0 | 0 | 0 | 1 | 0 | 1 | 0 | hsa-miR-647 | -0.23 | N/A | Sites in UTR |
| PMM2     | NM_000303    | phosphomannomutase 2                                                     | 0 | 0 | 0 | 0 | 1 | 0 | 1 | 0 | hsa-miR-647 | -0.23 | N/A | Sites in UTR |
| SETD1A   | NM_014712    | SET domain containing 1A                                                 | 0 | 0 | 0 | 0 | 1 | 0 | 1 | 0 | hsa-miR-647 | -0.23 | N/A | Sites in UTR |
| TELO2    | NM_016111    | TEL2, telomere maintenance 2, homolog ( <i>S. cerevisiae</i> )           | 0 | 0 | 0 | 0 | 1 | 0 | 1 | 0 | hsa-miR-647 | -0.23 | N/A | Sites in UTR |
| COBRA1   | NM_015456    | cofactor of BRCA1                                                        | 0 | 0 | 0 | 0 | 1 | 0 | 1 | 0 | hsa-miR-647 | -0.23 | N/A | Sites in UTR |
| IL36RN   | NM_012275    | interleukin 36 receptor antagonist                                       | 0 | 0 | 0 | 0 | 1 | 0 | 1 | 0 | hsa-miR-647 | -0.23 | N/A | Sites in UTR |
| AGGF1    | NM_018046    | angiogenic factor with G patch and FHA domains 1                         | 0 | 0 | 0 | 0 | 1 | 0 | 1 | 0 | hsa-miR-647 | -0.23 | N/A | Sites in UTR |
| RBM41    | NM_001171080 | RNA binding motif protein 41                                             | 0 | 0 | 0 | 0 | 1 | 0 | 1 | 0 | hsa-miR-647 | -0.23 | N/A | Sites in UTR |

|          |              |                                                                             |   |   |   |   |   |   |   |   |             |       |     |              |
|----------|--------------|-----------------------------------------------------------------------------|---|---|---|---|---|---|---|---|-------------|-------|-----|--------------|
| ELMO2    | NM_133171    | engulfment and cell motility 2                                              | 0 | 0 | 0 | 0 | 1 | 0 | 1 | 0 | hsa-miR-647 | -0.23 | N/A | Sites in UTR |
| FLOT2    | NM_004475    | flotillin 2                                                                 | 0 | 0 | 0 | 0 | 2 | 0 | 2 | 0 | hsa-miR-647 | -0.23 | N/A | Sites in UTR |
| LRRC20   | NM_018205    | leucine rich repeat containing 20                                           | 0 | 0 | 0 | 0 | 1 | 0 | 1 | 0 | hsa-miR-647 | -0.23 | N/A | Sites in UTR |
| BEST3    | NM_032735    | bestrophin 3                                                                | 0 | 0 | 0 | 0 | 1 | 0 | 1 | 0 | hsa-miR-647 | -0.23 | N/A | Sites in UTR |
| ZNF827   | NM_178835    | zinc finger protein 827                                                     | 0 | 0 | 0 | 0 | 1 | 0 | 1 | 0 | hsa-miR-647 | -0.23 | N/A | Sites in UTR |
| ACER3    | NM_018367    | alkaline ceramidase 3                                                       | 0 | 0 | 0 | 0 | 2 | 0 | 0 | 2 | hsa-miR-647 | -0.23 | N/A | Sites in UTR |
| PRR14L   | NM_173566    | proline rich 14-like                                                        | 0 | 0 | 0 | 0 | 1 | 1 | 0 | 0 | hsa-miR-647 | -0.23 | N/A | Sites in UTR |
| CATSPERB | NM_024764    | cation channel, sperm-associated, beta                                      | 0 | 0 | 0 | 0 | 1 | 0 | 0 | 1 | hsa-miR-647 | -0.23 | N/A | Sites in UTR |
| SAR1B    | NM_001033503 | SAR1 homolog B ( <i>S. cerevisiae</i> )                                     | 0 | 0 | 0 | 0 | 1 | 0 | 1 | 0 | hsa-miR-647 | -0.23 | N/A | Sites in UTR |
| PLEKHF2  | NM_024613    | pleckstrin homology domain containing, family F (with FYVE domain) member 2 | 0 | 0 | 0 | 0 | 1 | 0 | 1 | 0 | hsa-miR-647 | -0.23 | N/A | Sites in UTR |
| PPAPDC2  | NM_203453    | phosphatidic acid phosphatase type 2 domain containing 2                    | 0 | 0 | 0 | 0 | 1 | 0 | 1 | 0 | hsa-miR-647 | -0.23 | N/A | Sites in UTR |
| RFX2     | NM_000635    | regulatory factor X, 2 (influences HLA class II expression)                 | 0 | 0 | 0 | 0 | 2 | 0 | 2 | 0 | hsa-miR-647 | -0.23 | N/A | Sites in UTR |
| PVR      | NM_001135768 | poliovirus receptor                                                         | 0 | 0 | 0 | 0 | 3 | 0 | 3 | 0 | hsa-miR-647 | -0.23 | N/A | Sites in UTR |
| MR1      | NM_001194999 | major histocompatibility complex, class I-related                           | 0 | 0 | 0 | 0 | 2 | 1 | 1 | 0 | hsa-miR-647 | -0.23 | N/A | Sites in UTR |
| DIP2C    | NM_014974    | DIP2 disco-interacting protein 2 homolog C ( <i>Drosophila</i> )            | 0 | 0 | 0 | 0 | 1 | 0 | 1 | 0 | hsa-miR-647 | -0.23 | N/A | Sites in UTR |
| UMODL1   | NM_001004416 | uromodulin-like 1                                                           | 0 | 0 | 0 | 0 | 1 | 0 | 1 | 0 | hsa-miR-647 | -0.23 | N/A | Sites in UTR |
| MPP7     | NM_173496    | membrane protein, palmitoylated 7 (MAGUK p55 subfamily member 7)            | 0 | 0 | 0 | 0 | 1 | 0 | 1 | 0 | hsa-miR-647 | -0.23 | N/A | Sites in UTR |
| TMEM154  | NM_152680    | transmembrane protein 154                                                   | 0 | 0 | 0 | 0 | 2 | 0 | 0 | 2 | hsa-miR-647 | -0.23 | N/A | Sites in UTR |

|          |              |                                                                                           |   |   |   |   |   |   |   |   |             |       |     |              |
|----------|--------------|-------------------------------------------------------------------------------------------|---|---|---|---|---|---|---|---|-------------|-------|-----|--------------|
| PRELP    | NM_002725    | proline/arginine-rich end leucine-rich repeat protein                                     | 0 | 0 | 0 | 0 | 2 | 0 | 1 | 1 | hsa-miR-647 | -0.23 | N/A | Sites in UTR |
| CD4      | NM_000616    | CD4 molecule                                                                              | 0 | 0 | 0 | 0 | 2 | 0 | 1 | 1 | hsa-miR-647 | -0.23 | N/A | Sites in UTR |
| DNASE1L1 | NM_001009932 | deoxyribonuclease I-like 1                                                                | 0 | 0 | 0 | 0 | 2 | 0 | 1 | 1 | hsa-miR-647 | -0.23 | N/A | Sites in UTR |
| SUCLA2   | NM_003850    | succinate-CoA ligase, ADP-forming, beta subunit                                           | 0 | 0 | 0 | 0 | 1 | 0 | 1 | 0 | hsa-miR-647 | -0.23 | N/A | Sites in UTR |
| LSM14A   | NM_001114093 | LSM14A, SCD6 homolog A (S. cerevisiae)                                                    | 0 | 0 | 0 | 0 | 1 | 0 | 1 | 0 | hsa-miR-647 | -0.23 | N/A | Sites in UTR |
| LDLRAP1  | NM_015627    | low density lipoprotein receptor adaptor protein 1                                        | 0 | 0 | 0 | 0 | 1 | 0 | 1 | 0 | hsa-miR-647 | -0.23 | N/A | Sites in UTR |
| CLSPN    | NM_001190481 | claspin                                                                                   | 0 | 0 | 0 | 0 | 2 | 0 | 0 | 2 | hsa-miR-647 | -0.23 | N/A | Sites in UTR |
| LBH      | NM_030915    | limb bud and heart development homolog (mouse)                                            | 0 | 0 | 0 | 0 | 2 | 0 | 2 | 0 | hsa-miR-647 | -0.23 | N/A | Sites in UTR |
| ADAMTS17 | NM_139057    | ADAM metallopeptidase with thrombospondin type 1 motif, 17                                | 0 | 0 | 0 | 0 | 1 | 1 | 0 | 0 | hsa-miR-647 | -0.23 | N/A | Sites in UTR |
| HAAO     | NM_012205    | 3-hydroxyanthranilate 3,4-dioxygenase                                                     | 1 | 0 | 1 | 0 | 0 | 0 | 0 | 0 | hsa-miR-647 | -0.22 | N/A | Sites in UTR |
| RIBC1    | NM_144968    | RIB43A domain with coiled-coils 1                                                         | 0 | 0 | 0 | 0 | 1 | 0 | 1 | 0 | hsa-miR-647 | -0.22 | N/A | Sites in UTR |
| TTC24    | NM_001105669 | tetratricopeptide repeat domain 24                                                        | 0 | 0 | 0 | 0 | 1 | 0 | 1 | 0 | hsa-miR-647 | -0.22 | N/A | Sites in UTR |
| LRCH1    | NM_001164213 | leucine-rich repeats and calponin homology (CH) domain containing 1                       | 0 | 0 | 0 | 0 | 2 | 0 | 1 | 1 | hsa-miR-647 | -0.22 | N/A | Sites in UTR |
| RNF121   | NM_018320    | ring finger protein 121                                                                   | 0 | 0 | 0 | 0 | 2 | 0 | 1 | 1 | hsa-miR-647 | -0.22 | N/A | Sites in UTR |
| KCNN3    | NM_001204087 | potassium intermediate/small conductance calcium-activated channel, subfamily N, member 3 | 0 | 0 | 0 | 0 | 2 | 1 | 1 | 0 | hsa-miR-647 | -0.22 | N/A | Sites in UTR |
| ARF6     | NM_001663    | ADP-ribosylation factor 6                                                                 | 0 | 0 | 0 | 0 | 1 | 0 | 1 | 0 | hsa-miR-647 | -0.22 | N/A | Sites in UTR |
| TOMM22   | NM_020243    | translocase of outer mitochondrial membrane 22 homolog (yeast)                            | 0 | 0 | 0 | 0 | 1 | 0 | 1 | 0 | hsa-miR-647 | -0.22 | N/A | Sites in UTR |
| SETX     | NM_015046    | senataxin                                                                                 | 0 | 0 | 0 | 0 | 1 | 0 | 1 | 0 | hsa-miR-647 | -0.22 | N/A | Sites in UTR |

|           |              |                                                                        |   |   |   |   |   |   |   |   |             |       |     |              |
|-----------|--------------|------------------------------------------------------------------------|---|---|---|---|---|---|---|---|-------------|-------|-----|--------------|
| PITPNB    | NM_012399    | phosphatidylinositol transfer protein, beta                            | 0 | 0 | 0 | 0 | 1 | 0 | 1 | 0 | hsa-miR-647 | -0.22 | N/A | Sites in UTR |
| MYL10     | NM_138403    | myosin, light chain 10, regulatory                                     | 0 | 0 | 0 | 0 | 1 | 0 | 1 | 0 | hsa-miR-647 | -0.22 | N/A | Sites in UTR |
| C1orf65   | NM_152610    | chromosome 1 open reading frame 65                                     | 0 | 0 | 0 | 0 | 1 | 0 | 1 | 0 | hsa-miR-647 | -0.22 | N/A | Sites in UTR |
| RHBDL3    | NM_138328    | rhomboid, veinlet-like 3 (Drosophila)                                  | 0 | 0 | 0 | 0 | 2 | 0 | 2 | 0 | hsa-miR-647 | -0.22 | N/A | Sites in UTR |
| RPS10     | NM_001014    | ribosomal protein S10                                                  | 0 | 0 | 0 | 0 | 1 | 0 | 0 | 1 | hsa-miR-647 | -0.22 | N/A | Sites in UTR |
| ARSD      | NM_001669    | arylsulfatase D                                                        | 0 | 0 | 0 | 0 | 1 | 0 | 1 | 0 | hsa-miR-647 | -0.22 | N/A | Sites in UTR |
| ACSL3     | NM_004457    | acyl-CoA synthetase long-chain family member 3                         | 0 | 0 | 0 | 0 | 1 | 0 | 1 | 0 | hsa-miR-647 | -0.22 | N/A | Sites in UTR |
| THRSP     | NM_003251    | thyroid hormone responsive                                             | 0 | 0 | 0 | 0 | 1 | 0 | 1 | 0 | hsa-miR-647 | -0.22 | N/A | Sites in UTR |
| MRPS5     | NM_031902    | mitochondrial ribosomal protein S5                                     | 0 | 0 | 0 | 0 | 1 | 0 | 1 | 0 | hsa-miR-647 | -0.22 | N/A | Sites in UTR |
| C5orf44   | NM_001093755 | chromosome 5 open reading frame 44                                     | 0 | 0 | 0 | 0 | 1 | 0 | 1 | 0 | hsa-miR-647 | -0.22 | N/A | Sites in UTR |
| FAM185A   | NM_001145268 | family with sequence similarity 185, member A                          | 0 | 0 | 0 | 0 | 1 | 0 | 1 | 0 | hsa-miR-647 | -0.22 | N/A | Sites in UTR |
| ABCE1     | NM_001040876 | ATP-binding cassette, sub-family E (OABP), member 1                    | 0 | 0 | 0 | 0 | 1 | 1 | 0 | 0 | hsa-miR-647 | -0.22 | N/A | Sites in UTR |
| RANBP10   | NM_020850    | RAN binding protein 10                                                 | 0 | 0 | 0 | 0 | 2 | 0 | 1 | 1 | hsa-miR-647 | -0.22 | N/A | Sites in UTR |
| SNRNP48   | NM_152551    | small nuclear ribonucleoprotein 48kDa (U11/U12)                        | 0 | 0 | 0 | 0 | 2 | 0 | 2 | 0 | hsa-miR-647 | -0.22 | N/A | Sites in UTR |
| ADCYAP1R1 | NM_001118    | adenylate cyclase activating polypeptide 1 (pituitary) receptor type I | 0 | 0 | 0 | 0 | 1 | 0 | 1 | 0 | hsa-miR-647 | -0.22 | N/A | Sites in UTR |
| JMJD6     | NM_001081461 | jumonji domain containing 6                                            | 0 | 0 | 0 | 0 | 1 | 0 | 1 | 0 | hsa-miR-647 | -0.22 | N/A | Sites in UTR |
| FAM20A    | NM_017565    | family with sequence similarity 20, member A                           | 0 | 0 | 0 | 0 | 1 | 0 | 1 | 0 | hsa-miR-647 | -0.22 | N/A | Sites in UTR |
| EMILIN3   | NM_052846    | elastin microfibril interfacier 3                                      | 0 | 0 | 0 | 0 | 2 | 0 | 1 | 1 | hsa-miR-647 | -0.22 | N/A | Sites in UTR |



|         |              |                                                              |   |   |   |   |   |   |   |   |             |       |     |              |
|---------|--------------|--------------------------------------------------------------|---|---|---|---|---|---|---|---|-------------|-------|-----|--------------|
| ZAK     | NM_133646    | sterile alpha motif and leucine zipper containing kinase AZK | 0 | 0 | 0 | 0 | 2 | 1 | 0 | 1 | hsa-miR-647 | -0.22 | N/A | Sites in UTR |
| MRPL30  | NM_145212    | mitochondrial ribosomal protein L30                          | 0 | 0 | 0 | 0 | 3 | 0 | 0 | 3 | hsa-miR-647 | -0.22 | N/A | Sites in UTR |
| ALOX12  | NM_000697    | arachidonate 12-lipoxygenase                                 | 0 | 0 | 0 | 0 | 1 | 0 | 1 | 0 | hsa-miR-647 | -0.22 | N/A | Sites in UTR |
| SSH1    | NM_001161330 | slingshot homolog 1 (Drosophila)                             | 0 | 0 | 0 | 0 | 1 | 0 | 0 | 1 | hsa-miR-647 | -0.22 | N/A | Sites in UTR |
| CRYAA   | NM_000394    | crystallin, alpha A                                          | 0 | 0 | 0 | 0 | 1 | 0 | 1 | 0 | hsa-miR-647 | -0.22 | N/A | Sites in UTR |
| EVPL    | NM_001988    | envoplakin                                                   | 0 | 0 | 0 | 0 | 1 | 0 | 1 | 0 | hsa-miR-647 | -0.22 | N/A | Sites in UTR |
| GBGT1   | NM_021996    | globoside alpha-1,3-N-acetylgalactosaminyltransferase 1      | 0 | 0 | 0 | 0 | 1 | 0 | 1 | 0 | hsa-miR-647 | -0.22 | N/A | Sites in UTR |
| TRIM11  | NM_145214    | tripartite motif containing 11                               | 0 | 0 | 0 | 0 | 1 | 0 | 1 | 0 | hsa-miR-647 | -0.22 | N/A | Sites in UTR |
| PCSK9   | NM_174936    | proprotein convertase subtilisin/kexin type 9                | 0 | 0 | 0 | 0 | 2 | 0 | 0 | 2 | hsa-miR-647 | -0.22 | N/A | Sites in UTR |
| BEAN1   | NM_001136106 | brain expressed, associated with NEDD4, 1                    | 0 | 0 | 0 | 0 | 1 | 1 | 0 | 0 | hsa-miR-647 | -0.22 | N/A | Sites in UTR |
| PLCZ1   | NM_033123    | phospholipase C, zeta 1                                      | 0 | 0 | 0 | 0 | 1 | 0 | 0 | 1 | hsa-miR-647 | -0.22 | N/A | Sites in UTR |
| C8orf34 | NM_001195639 | chromosome 8 open reading frame 34                           | 0 | 0 | 0 | 0 | 1 | 0 | 0 | 1 | hsa-miR-647 | -0.22 | N/A | Sites in UTR |
| MPZ     | NM_000530    | myelin protein zero                                          | 0 | 0 | 0 | 0 | 1 | 0 | 1 | 0 | hsa-miR-647 | -0.22 | N/A | Sites in UTR |
| MAPK7   | NM_002749    | mitogen-activated protein kinase 7                           | 0 | 0 | 0 | 0 | 1 | 0 | 1 | 0 | hsa-miR-647 | -0.22 | N/A | Sites in UTR |
| AHNAK2  | NM_138420    | AHNAK nucleoprotein 2                                        | 0 | 0 | 0 | 0 | 1 | 0 | 1 | 0 | hsa-miR-647 | -0.22 | N/A | Sites in UTR |
| GFER    | NM_005262    | growth factor, augmenter of liver regeneration               | 0 | 0 | 0 | 0 | 2 | 0 | 2 | 0 | hsa-miR-647 | -0.22 | N/A | Sites in UTR |
| FUT10   | NM_032664    | fucosyltransferase 10 (alpha (1,3) fucosyltransferase)       | 0 | 0 | 0 | 0 | 2 | 0 | 2 | 0 | hsa-miR-647 | -0.22 | N/A | Sites in UTR |
| ALX3    | NM_006492    | ALX homeobox 3                                               | 0 | 0 | 0 | 0 | 1 | 0 | 1 | 0 | hsa-miR-647 | -0.22 | N/A | Sites in UTR |

|          |              |                                                                       |   |   |   |   |   |   |   |   |             |       |     |              |
|----------|--------------|-----------------------------------------------------------------------|---|---|---|---|---|---|---|---|-------------|-------|-----|--------------|
| TRANK1   | NM_014831    | tetratricopeptide repeat and ankyrin repeat containing 1              | 0 | 0 | 0 | 0 | 1 | 0 | 1 | 0 | hsa-miR-647 | -0.22 | N/A | Sites in UTR |
| TNS3     | NM_022748    | tensin 3                                                              | 0 | 0 | 0 | 0 | 1 | 1 | 0 | 0 | hsa-miR-647 | -0.22 | N/A | Sites in UTR |
| PFKFB4   | NM_004567    | 6-phosphofructo-2-kinase/fructose-2,6-biphosphatase 4                 | 0 | 0 | 0 | 0 | 2 | 1 | 1 | 0 | hsa-miR-647 | -0.22 | N/A | Sites in UTR |
| BNC2     | NM_017637    | basonuclin 2                                                          | 1 | 1 | 0 | 0 | 1 | 0 | 0 | 1 | hsa-miR-647 | -0.22 | N/A | Sites in UTR |
| ZBTB39   | NM_014830    | zinc finger and BTB domain containing 39                              | 0 | 0 | 0 | 0 | 1 | 0 | 1 | 0 | hsa-miR-647 | -0.21 | N/A | Sites in UTR |
| MLH3     | NM_001040108 | mutL homolog 3 (E. coli)                                              | 0 | 0 | 0 | 0 | 1 | 0 | 1 | 0 | hsa-miR-647 | -0.21 | N/A | Sites in UTR |
| PKN3     | NM_013355    | protein kinase N3                                                     | 0 | 0 | 0 | 0 | 1 | 0 | 1 | 0 | hsa-miR-647 | -0.21 | N/A | Sites in UTR |
| RTN4R    | NM_023004    | reticulon 4 receptor                                                  | 0 | 0 | 0 | 0 | 1 | 0 | 1 | 0 | hsa-miR-647 | -0.21 | N/A | Sites in UTR |
| GGA2     | NM_015044    | golgi-associated, gamma adaptin ear containing, ARF binding protein 2 | 0 | 0 | 0 | 0 | 2 | 0 | 1 | 1 | hsa-miR-647 | -0.21 | N/A | Sites in UTR |
| C1orf226 | NM_001085375 | chromosome 1 open reading frame 226                                   | 0 | 0 | 0 | 0 | 2 | 0 | 2 | 0 | hsa-miR-647 | -0.21 | N/A | Sites in UTR |
| SLC9A8   | NM_015266    | solute carrier family 9 (sodium/hydrogen exchanger), member 8         | 0 | 0 | 0 | 0 | 2 | 0 | 1 | 1 | hsa-miR-647 | -0.21 | N/A | Sites in UTR |
| C5orf64  | NM_173667    | chromosome 5 open reading frame 64                                    | 0 | 0 | 0 | 0 | 1 | 0 | 0 | 1 | hsa-miR-647 | -0.21 | N/A | Sites in UTR |
| MKS1     | NM_001165927 | Meckel syndrome, type 1                                               | 0 | 0 | 0 | 0 | 1 | 0 | 1 | 0 | hsa-miR-647 | -0.21 | N/A | Sites in UTR |
| ZSCAN18  | NM_001145542 | zinc finger and SCAN domain containing 18                             | 0 | 0 | 0 | 0 | 1 | 0 | 1 | 0 | hsa-miR-647 | -0.21 | N/A | Sites in UTR |
| ODZ4     | NM_001098816 | odz, odd Oz/ten-m homolog 4 (Drosophila)                              | 2 | 0 | 1 | 1 | 2 | 0 | 1 | 1 | hsa-miR-647 | -0.21 | N/A | Sites in UTR |
| HJURP    | NM_018410    | Holliday junction recognition protein                                 | 0 | 0 | 0 | 0 | 1 | 0 | 1 | 0 | hsa-miR-647 | -0.21 | N/A | Sites in UTR |
| PUS1     | NM_001002019 | pseudouridylate synthase 1                                            | 0 | 0 | 0 | 0 | 1 | 0 | 1 | 0 | hsa-miR-647 | -0.21 | N/A | Sites in UTR |
| KPNA1    | NM_002264    | karyopherin alpha 1 (importin alpha 5)                                | 3 | 1 | 1 | 1 | 0 | 0 | 0 | 0 | hsa-miR-647 | -0.21 | N/A | Sites in UTR |

|          |              |                                                           |   |   |   |   |   |   |   |   |             |       |     |              |
|----------|--------------|-----------------------------------------------------------|---|---|---|---|---|---|---|---|-------------|-------|-----|--------------|
| C1orf21  | NM_030806    | chromosome 1 open reading frame 21                        | 1 | 1 | 0 | 0 | 2 | 0 | 2 | 0 | hsa-miR-647 | -0.21 | N/A | Sites in UTR |
| CD53     | NM_000560    | CD53 molecule                                             | 0 | 0 | 0 | 0 | 1 | 0 | 1 | 0 | hsa-miR-647 | -0.21 | N/A | Sites in UTR |
| LMX1A    | NM_001174069 | LIM homeobox transcription factor 1, alpha                | 0 | 0 | 0 | 0 | 1 | 0 | 1 | 0 | hsa-miR-647 | -0.21 | N/A | Sites in UTR |
| PDLIM5   | NM_001011515 | PDZ and LIM domain 5                                      | 0 | 0 | 0 | 0 | 1 | 0 | 1 | 0 | hsa-miR-647 | -0.21 | N/A | Sites in UTR |
| MFAP3L   | NM_001009554 | microfibrillar-associated protein 3-like                  | 0 | 0 | 0 | 0 | 1 | 1 | 0 | 0 | hsa-miR-647 | -0.21 | N/A | Sites in UTR |
| UBE2H    | NM_001202498 | ubiquitin-conjugating enzyme E2H                          | 0 | 0 | 0 | 0 | 2 | 1 | 1 | 0 | hsa-miR-647 | -0.21 | N/A | Sites in UTR |
| TBC1D16  | NM_019020    | TBC1 domain family, member 16                             | 0 | 0 | 0 | 0 | 2 | 0 | 2 | 0 | hsa-miR-647 | -0.21 | N/A | Sites in UTR |
| KIF5B    | NM_004521    | kinesin family member 5B                                  | 0 | 0 | 0 | 0 | 1 | 0 | 1 | 0 | hsa-miR-647 | -0.21 | N/A | Sites in UTR |
| ROR1     | NM_001083592 | receptor tyrosine kinase-like orphan receptor 1           | 0 | 0 | 0 | 0 | 1 | 0 | 1 | 0 | hsa-miR-647 | -0.21 | N/A | Sites in UTR |
| C21orf33 | NM_004649    | chromosome 21 open reading frame 33                       | 0 | 0 | 0 | 0 | 1 | 0 | 1 | 0 | hsa-miR-647 | -0.21 | N/A | Sites in UTR |
| EHD3     | NM_014600    | EH-domain containing 3                                    | 0 | 0 | 0 | 0 | 1 | 0 | 1 | 0 | hsa-miR-647 | -0.21 | N/A | Sites in UTR |
| GLT25D2  | NM_015101    | glycosyltransferase 25 domain containing 2                | 0 | 0 | 0 | 0 | 2 | 0 | 2 | 0 | hsa-miR-647 | -0.21 | N/A | Sites in UTR |
| ZBTB7C   | NM_001039360 | zinc finger and BTB domain containing 7C                  | 0 | 0 | 0 | 0 | 2 | 0 | 0 | 2 | hsa-miR-647 | -0.21 | N/A | Sites in UTR |
| BACE1    | NM_001207048 | beta-site APP-cleaving enzyme 1                           | 0 | 0 | 0 | 0 | 1 | 1 | 0 | 0 | hsa-miR-647 | -0.21 | N/A | Sites in UTR |
| COPB1    | NM_001144061 | coatamer protein complex, subunit beta 1                  | 0 | 0 | 0 | 0 | 1 | 0 | 0 | 1 | hsa-miR-647 | -0.21 | N/A | Sites in UTR |
| FAT3     | NM_001008781 | FAT tumor suppressor homolog 3 (Drosophila)               | 0 | 0 | 0 | 0 | 1 | 0 | 0 | 1 | hsa-miR-647 | -0.21 | N/A | Sites in UTR |
| CYP11A1  | NM_000781    | cytochrome P450, family 11, subfamily A, polypeptide 1    | 0 | 0 | 0 | 0 | 1 | 0 | 1 | 0 | hsa-miR-647 | -0.21 | N/A | Sites in UTR |
| SLC1A7   | NM_006671    | solute carrier family 1 (glutamate transporter), member 7 | 0 | 0 | 0 | 0 | 1 | 0 | 1 | 0 | hsa-miR-647 | -0.21 | N/A | Sites in UTR |

|          |              |                                                              |   |   |   |   |   |   |   |   |             |       |     |              |
|----------|--------------|--------------------------------------------------------------|---|---|---|---|---|---|---|---|-------------|-------|-----|--------------|
| TCP11    | NM_001093728 | t-complex 11 homolog (mouse)                                 | 0 | 0 | 0 | 0 | 1 | 0 | 1 | 0 | hsa-miR-647 | -0.21 | N/A | Sites in UTR |
| USH1C    | NM_005709    | Usher syndrome 1C (autosomal recessive, severe)              | 0 | 0 | 0 | 0 | 1 | 0 | 1 | 0 | hsa-miR-647 | -0.21 | N/A | Sites in UTR |
| POLQ     | NM_199420    | polymerase (DNA directed), theta                             | 0 | 0 | 0 | 0 | 1 | 0 | 1 | 0 | hsa-miR-647 | -0.21 | N/A | Sites in UTR |
| MAP2K4   | NM_003010    | mitogen-activated protein kinase kinase 4                    | 0 | 0 | 0 | 0 | 2 | 0 | 0 | 2 | hsa-miR-647 | -0.21 | N/A | Sites in UTR |
| AP2A2    | NM_001242837 | adaptor-related protein complex 2, alpha 2 subunit           | 0 | 0 | 0 | 0 | 2 | 0 | 2 | 0 | hsa-miR-647 | -0.21 | N/A | Sites in UTR |
| MAP2K7   | NM_145185    | mitogen-activated protein kinase kinase 7                    | 0 | 0 | 0 | 0 | 2 | 0 | 1 | 1 | hsa-miR-647 | -0.21 | N/A | Sites in UTR |
| IL28RA   | NM_170743    | interleukin 28 receptor, alpha (interferon, lambda receptor) | 0 | 0 | 0 | 0 | 2 | 0 | 1 | 1 | hsa-miR-647 | -0.21 | N/A | Sites in UTR |
| TMEM183A | NM_138391    | transmembrane protein 183A                                   | 0 | 0 | 0 | 0 | 1 | 0 | 0 | 1 | hsa-miR-647 | -0.21 | N/A | Sites in UTR |
| CD27     | NM_001242    | CD27 molecule                                                | 0 | 0 | 0 | 0 | 1 | 0 | 1 | 0 | hsa-miR-647 | -0.21 | N/A | Sites in UTR |
| PECAM1   | NM_000442    | platelet/endothelial cell adhesion molecule                  | 0 | 0 | 0 | 0 | 1 | 0 | 1 | 0 | hsa-miR-647 | -0.21 | N/A | Sites in UTR |
| AKAP17A  | NM_005088    | A kinase (PRKA) anchor protein 17A                           | 0 | 0 | 0 | 0 | 1 | 0 | 1 | 0 | hsa-miR-647 | -0.21 | N/A | Sites in UTR |
| SYNPO    | NM_007286    | synaptopodin                                                 | 0 | 0 | 0 | 0 | 1 | 0 | 1 | 0 | hsa-miR-647 | -0.21 | N/A | Sites in UTR |
| ELMOD3   | NM_001135021 | ELMO/CED-12 domain containing 3                              | 0 | 0 | 0 | 0 | 1 | 0 | 1 | 0 | hsa-miR-647 | -0.21 | N/A | Sites in UTR |
| TYW1B    | NM_001145440 | tRNA-glycyl synthetizing protein 1 homolog B (S. cerevisiae) | 0 | 0 | 0 | 0 | 1 | 0 | 1 | 0 | hsa-miR-647 | -0.21 | N/A | Sites in UTR |
| PCDHA9   | NM_031857    | protocadherin alpha 9                                        | 0 | 0 | 0 | 0 | 2 | 0 | 1 | 1 | hsa-miR-647 | -0.21 | N/A | Sites in UTR |
| PCDHAC2  | NM_018899    | protocadherin alpha subfamily C, 2                           | 0 | 0 | 0 | 0 | 2 | 0 | 1 | 1 | hsa-miR-647 | -0.21 | N/A | Sites in UTR |
| PCDHAC1  | NM_018898    | protocadherin alpha subfamily C, 1                           | 0 | 0 | 0 | 0 | 2 | 0 | 1 | 1 | hsa-miR-647 | -0.21 | N/A | Sites in UTR |
| PCDHA13  | NM_018904    | protocadherin alpha 13                                       | 0 | 0 | 0 | 0 | 2 | 0 | 1 | 1 | hsa-miR-647 | -0.21 | N/A | Sites in UTR |

|         |              |                                                                  |   |   |   |   |   |   |   |   |             |       |     |              |
|---------|--------------|------------------------------------------------------------------|---|---|---|---|---|---|---|---|-------------|-------|-----|--------------|
| PCDHA12 | NM_018903    | protocadherin alpha 12                                           | 0 | 0 | 0 | 0 | 2 | 0 | 1 | 1 | hsa-miR-647 | -0.21 | N/A | Sites in UTR |
| PCDHA11 | NM_018902    | protocadherin alpha 11                                           | 0 | 0 | 0 | 0 | 2 | 0 | 1 | 1 | hsa-miR-647 | -0.21 | N/A | Sites in UTR |
| PCDHA10 | NM_018901    | protocadherin alpha 10                                           | 0 | 0 | 0 | 0 | 2 | 0 | 1 | 1 | hsa-miR-647 | -0.21 | N/A | Sites in UTR |
| PCDHA8  | NM_018911    | protocadherin alpha 8                                            | 0 | 0 | 0 | 0 | 2 | 0 | 1 | 1 | hsa-miR-647 | -0.21 | N/A | Sites in UTR |
| PCDHA7  | NM_018910    | protocadherin alpha 7                                            | 0 | 0 | 0 | 0 | 2 | 0 | 1 | 1 | hsa-miR-647 | -0.21 | N/A | Sites in UTR |
| PCDHA6  | NM_018909    | protocadherin alpha 6                                            | 0 | 0 | 0 | 0 | 2 | 0 | 1 | 1 | hsa-miR-647 | -0.21 | N/A | Sites in UTR |
| PCDHA5  | NM_018908    | protocadherin alpha 5                                            | 0 | 0 | 0 | 0 | 2 | 0 | 1 | 1 | hsa-miR-647 | -0.21 | N/A | Sites in UTR |
| PCDHA4  | NM_018907    | protocadherin alpha 4                                            | 0 | 0 | 0 | 0 | 2 | 0 | 1 | 1 | hsa-miR-647 | -0.21 | N/A | Sites in UTR |
| PCDHA3  | NM_018906    | protocadherin alpha 3                                            | 0 | 0 | 0 | 0 | 2 | 0 | 1 | 1 | hsa-miR-647 | -0.21 | N/A | Sites in UTR |
| PCDHA2  | NM_018905    | protocadherin alpha 2                                            | 0 | 0 | 0 | 0 | 2 | 0 | 1 | 1 | hsa-miR-647 | -0.21 | N/A | Sites in UTR |
| PCDHA1  | NM_018900    | protocadherin alpha 1                                            | 0 | 0 | 0 | 0 | 2 | 0 | 1 | 1 | hsa-miR-647 | -0.21 | N/A | Sites in UTR |
| LRRTM2  | NM_015564    | leucine rich repeat transmembrane neuronal 2                     | 0 | 0 | 0 | 0 | 2 | 1 | 1 | 0 | hsa-miR-647 | -0.21 | N/A | Sites in UTR |
| CCDC90A | NM_001031713 | coiled-coil domain containing 90A                                | 0 | 0 | 0 | 0 | 1 | 0 | 0 | 1 | hsa-miR-647 | -0.21 | N/A | Sites in UTR |
| CYP11B2 | NM_000498    | cytochrome P450, family 11, subfamily B, polypeptide 2           | 0 | 0 | 0 | 0 | 1 | 0 | 1 | 0 | hsa-miR-647 | -0.21 | N/A | Sites in UTR |
| PRDX1   | NM_001202431 | peroxiredoxin 1                                                  | 0 | 0 | 0 | 0 | 1 | 0 | 1 | 0 | hsa-miR-647 | -0.21 | N/A | Sites in UTR |
| ITSN1   | NM_003024    | intersectin 1 (SH3 domain protein)                               | 0 | 0 | 0 | 0 | 1 | 0 | 1 | 0 | hsa-miR-647 | -0.21 | N/A | Sites in UTR |
| TLE2    | NM_001144761 | transducin-like enhancer of split 2 (E(sp1) homolog, Drosophila) | 0 | 0 | 0 | 0 | 1 | 0 | 1 | 0 | hsa-miR-647 | -0.21 | N/A | Sites in UTR |
| DDX3Y   | NM_001122665 | DEAD (Asp-Glu-Ala-Asp) box polypeptide 3, Y-linked               | 0 | 0 | 0 | 0 | 1 | 0 | 1 | 0 | hsa-miR-647 | -0.21 | N/A | Sites in UTR |

|             |              |                                                                                              |   |   |   |   |   |   |   |   |   |             |       |     |              |
|-------------|--------------|----------------------------------------------------------------------------------------------|---|---|---|---|---|---|---|---|---|-------------|-------|-----|--------------|
| AKAP2       | NM_001004065 | A kinase (PRKA) anchor protein 2                                                             | 1 | 0 | 1 | 0 | 0 | 0 | 0 | 0 | 0 | hsa-miR-647 | -0.21 | N/A | Sites in UTR |
| STK38       | NM_007271    | serine/threonine kinase 38                                                                   | 0 | 0 | 0 | 0 | 1 | 0 | 1 | 0 | 0 | hsa-miR-647 | -0.21 | N/A | Sites in UTR |
| POGZ        | NM_001194937 | pogo transposable element with ZNF domain                                                    | 0 | 0 | 0 | 0 | 1 | 0 | 1 | 0 | 0 | hsa-miR-647 | -0.21 | N/A | Sites in UTR |
| C10orf12    | NM_015652    | chromosome 10 open reading frame 12                                                          | 0 | 0 | 0 | 0 | 1 | 0 | 1 | 0 | 0 | hsa-miR-647 | -0.21 | N/A | Sites in UTR |
| PPM1H       | NM_020700    | protein phosphatase, Mg2+/Mn2+ dependent, 1H                                                 | 1 | 0 | 1 | 0 | 0 | 0 | 0 | 0 | 0 | hsa-miR-647 | -0.21 | N/A | Sites in UTR |
| C16orf92    | NM_001109659 | chromosome 16 open reading frame 92                                                          | 0 | 0 | 0 | 0 | 1 | 0 | 1 | 0 | 0 | hsa-miR-647 | -0.21 | N/A | Sites in UTR |
| PALM2-AKAP2 | NM_007203    | PALM2-AKAP2 readthrough                                                                      | 1 | 0 | 1 | 0 | 0 | 0 | 0 | 0 | 0 | hsa-miR-647 | -0.21 | N/A | Sites in UTR |
| SLC25A27    | NM_001204051 | solute carrier family 25, member 27                                                          | 0 | 0 | 0 | 0 | 2 | 0 | 0 | 2 | 0 | hsa-miR-647 | -0.21 | N/A | Sites in UTR |
| DRAM1       | NM_018370    | DNA-damage regulated autophagy modulator 1                                                   | 0 | 0 | 0 | 0 | 1 | 1 | 0 | 0 | 0 | hsa-miR-647 | -0.21 | N/A | Sites in UTR |
| AGPAT6      | NM_178819    | 1-acylglycerol-3-phosphate O-acyltransferase 6 (lysophosphatidic acid acyltransferase, zeta) | 0 | 0 | 0 | 0 | 3 | 0 | 2 | 1 | 0 | hsa-miR-647 | -0.21 | N/A | Sites in UTR |
| SEMA3B      | NM_001005914 | sema domain, immunoglobulin domain (Ig), short basic domain, secreted, (semaphorin) 3B       | 0 | 0 | 0 | 0 | 1 | 0 | 0 | 1 | 0 | hsa-miR-647 | -0.21 | N/A | Sites in UTR |
| KCMF1       | NM_020122    | potassium channel modulatory factor 1                                                        | 0 | 0 | 0 | 0 | 1 | 0 | 1 | 0 | 0 | hsa-miR-647 | -0.21 | N/A | Sites in UTR |
| SH3RF3      | NM_001099289 | SH3 domain containing ring finger 3                                                          | 0 | 0 | 0 | 0 | 1 | 0 | 1 | 0 | 0 | hsa-miR-647 | -0.21 | N/A | Sites in UTR |
| RCOR3       | NM_001136223 | REST corepressor 3                                                                           | 0 | 0 | 0 | 0 | 1 | 1 | 0 | 0 | 0 | hsa-miR-647 | -0.21 | N/A | Sites in UTR |
| PPP1R9A     | NM_001166160 | protein phosphatase 1, regulatory (inhibitor) subunit 9A                                     | 0 | 0 | 0 | 0 | 2 | 0 | 1 | 1 | 0 | hsa-miR-647 | -0.21 | N/A | Sites in UTR |
| THAP5       | NM_001130475 | THAP domain containing 5                                                                     | 0 | 0 | 0 | 0 | 1 | 0 | 0 | 1 | 0 | hsa-miR-647 | -0.21 | N/A | Sites in UTR |
| ITGB3       | NM_000212    | integrin, beta 3 (platelet glycoprotein IIIa, antigen CD61)                                  | 0 | 0 | 0 | 0 | 1 | 0 | 1 | 0 | 0 | hsa-miR-647 | -0.21 | N/A | Sites in UTR |
| ATP6V1G1    | NM_004888    | ATPase, H+ transporting, lysosomal 13kDa, V1 subunit G1                                      | 1 | 0 | 1 | 0 | 0 | 0 | 0 | 0 | 0 | hsa-miR-647 | -0.21 | N/A | Sites in UTR |

|          |              |                                                                         |   |   |   |   |   |   |   |   |             |       |     |              |
|----------|--------------|-------------------------------------------------------------------------|---|---|---|---|---|---|---|---|-------------|-------|-----|--------------|
| R3HDM1   | NM_015361    | R3H domain containing 1                                                 | 0 | 0 | 0 | 0 | 1 | 0 | 1 | 0 | hsa-miR-647 | -0.21 | N/A | Sites in UTR |
| DDIT4    | NM_019058    | DNA-damage-inducible transcript 4                                       | 0 | 0 | 0 | 0 | 1 | 0 | 1 | 0 | hsa-miR-647 | -0.21 | N/A | Sites in UTR |
| CHRNA10  | NM_020402    | cholinergic receptor, nicotinic, alpha 10                               | 1 | 0 | 1 | 0 | 0 | 0 | 0 | 0 | hsa-miR-647 | -0.21 | N/A | Sites in UTR |
| KLHL25   | NM_022480    | kelch-like 25 (Drosophila)                                              | 0 | 0 | 0 | 0 | 1 | 0 | 1 | 0 | hsa-miR-647 | -0.21 | N/A | Sites in UTR |
| WSCD1    | NM_015253    | WSC domain containing 1                                                 | 0 | 0 | 0 | 0 | 2 | 0 | 1 | 1 | hsa-miR-647 | -0.21 | N/A | Sites in UTR |
| CASP14   | NM_012114    | caspase 14, apoptosis-related cysteine peptidase                        | 0 | 0 | 0 | 0 | 2 | 0 | 0 | 2 | hsa-miR-647 | -0.21 | N/A | Sites in UTR |
| ATF7     | NM_001130059 | activating transcription factor 7                                       | 0 | 0 | 0 | 0 | 2 | 0 | 0 | 2 | hsa-miR-647 | -0.21 | N/A | Sites in UTR |
| SPTY2D1  | NM_194285    | SPT2, Suppressor of Ty, domain containing 1 (S. cerevisiae)             | 0 | 0 | 0 | 0 | 2 | 0 | 0 | 2 | hsa-miR-647 | -0.21 | N/A | Sites in UTR |
| C9orf167 | NM_017723    | chromosome 9 open reading frame 167                                     | 0 | 0 | 0 | 0 | 2 | 0 | 1 | 1 | hsa-miR-647 | -0.21 | N/A | Sites in UTR |
| RABL3    | NM_173825    | RAB, member of RAS oncogene family-like 3                               | 0 | 0 | 0 | 0 | 1 | 1 | 0 | 0 | hsa-miR-647 | -0.21 | N/A | Sites in UTR |
| AKT3     | NM_005465    | v-akt murine thymoma viral oncogene homolog 3 (protein kinase B, gamma) | 0 | 0 | 0 | 0 | 2 | 0 | 1 | 1 | hsa-miR-647 | -0.21 | N/A | Sites in UTR |
| RGAG4    | NM_001024455 | retrotransposon gag domain containing 4                                 | 0 | 0 | 0 | 0 | 2 | 0 | 1 | 1 | hsa-miR-647 | -0.21 | N/A | Sites in UTR |
| USP53    | NM_019050    | ubiquitin specific peptidase 53                                         | 0 | 0 | 0 | 0 | 1 | 0 | 0 | 1 | hsa-miR-647 | -0.2  | N/A | Sites in UTR |
| NAMPT    | NM_005746    | nicotinamide phosphoribosyltransferase                                  | 1 | 0 | 0 | 1 | 0 | 0 | 0 | 0 | hsa-miR-647 | -0.2  | N/A | Sites in UTR |
| EXOC2    | NM_018303    | exocyst complex component 2                                             | 0 | 0 | 0 | 0 | 1 | 0 | 0 | 1 | hsa-miR-647 | -0.2  | N/A | Sites in UTR |
| FREM3    | NM_001168235 | FRAS1 related extracellular matrix 3                                    | 0 | 0 | 0 | 0 | 1 | 0 | 0 | 1 | hsa-miR-647 | -0.2  | N/A | Sites in UTR |
| FXD3     | NM_001136008 | FXD domain containing ion transport regulator 3                         | 0 | 0 | 0 | 0 | 1 | 0 | 1 | 0 | hsa-miR-647 | -0.2  | N/A | Sites in UTR |
| KDM4C    | NM_001146695 | lysine (K)-specific demethylase 4C                                      | 0 | 0 | 0 | 0 | 1 | 0 | 1 | 0 | hsa-miR-647 | -0.2  | N/A | Sites in UTR |

|              |              |                                                                          |   |   |   |   |   |   |   |   |             |      |     |              |
|--------------|--------------|--------------------------------------------------------------------------|---|---|---|---|---|---|---|---|-------------|------|-----|--------------|
| WWC3         | NM_015691    | WWC family member 3                                                      | 0 | 0 | 0 | 0 | 1 | 0 | 1 | 0 | hsa-miR-647 | -0.2 | N/A | Sites in UTR |
| NARFL        | NM_022493    | nuclear prelamin A recognition factor-like                               | 0 | 0 | 0 | 0 | 1 | 0 | 1 | 0 | hsa-miR-647 | -0.2 | N/A | Sites in UTR |
| ADRA2C       | NM_000683    | adrenergic, alpha-2C-, receptor                                          | 0 | 0 | 0 | 0 | 1 | 0 | 0 | 1 | hsa-miR-647 | -0.2 | N/A | Sites in UTR |
| P2RY11       | NM_002566    | purinergic receptor P2Y, G-protein coupled, 11                           | 0 | 0 | 0 | 0 | 1 | 0 | 1 | 0 | hsa-miR-647 | -0.2 | N/A | Sites in UTR |
| PTGFRN       | NM_020440    | prostaglandin F2 receptor negative regulator                             | 1 | 0 | 1 | 0 | 0 | 0 | 0 | 0 | hsa-miR-647 | -0.2 | N/A | Sites in UTR |
| TUFT1        | NM_001126337 | tuftelin 1                                                               | 0 | 0 | 0 | 0 | 1 | 0 | 1 | 0 | hsa-miR-647 | -0.2 | N/A | Sites in UTR |
| NFE2L3       | NM_004289    | nuclear factor (erythroid-derived 2)-like 3                              | 0 | 0 | 0 | 0 | 1 | 0 | 1 | 0 | hsa-miR-647 | -0.2 | N/A | Sites in UTR |
| RBM19        | NM_016196    | RNA binding motif protein 19                                             | 0 | 0 | 0 | 0 | 1 | 0 | 1 | 0 | hsa-miR-647 | -0.2 | N/A | Sites in UTR |
| VPS24        | NM_001005753 | vacuolar protein sorting 24 homolog ( <i>S. cerevisiae</i> )             | 0 | 0 | 0 | 0 | 1 | 0 | 1 | 0 | hsa-miR-647 | -0.2 | N/A | Sites in UTR |
| TYW1         | NM_018264    | tRNA- $\gamma$ W synthesizing protein 1 homolog ( <i>S. cerevisiae</i> ) | 0 | 0 | 0 | 0 | 1 | 0 | 1 | 0 | hsa-miR-647 | -0.2 | N/A | Sites in UTR |
| PPAN-P2RY11  | NM_001040664 | PPAN-P2RY11 readthrough                                                  | 0 | 0 | 0 | 0 | 1 | 0 | 1 | 0 | hsa-miR-647 | -0.2 | N/A | Sites in UTR |
| RNF103-VPS24 | NM_001198954 | RNF103-VPS24 readthrough                                                 | 0 | 0 | 0 | 0 | 1 | 0 | 1 | 0 | hsa-miR-647 | -0.2 | N/A | Sites in UTR |
| EEPD1        | NM_030636    | endonuclease/exonuclease/phosphatase family domain containing 1          | 0 | 0 | 0 | 0 | 2 | 0 | 0 | 2 | hsa-miR-647 | -0.2 | N/A | Sites in UTR |
| POFUT1       | NM_015352    | protein O-fucosyltransferase 1                                           | 0 | 0 | 0 | 0 | 2 | 0 | 2 | 0 | hsa-miR-647 | -0.2 | N/A | Sites in UTR |
| PNMA3        | NM_013364    | paraneoplastic antigen MA3                                               | 0 | 0 | 0 | 0 | 2 | 0 | 2 | 0 | hsa-miR-647 | -0.2 | N/A | Sites in UTR |
| NOVA1        | NM_002515    | neuro-oncological ventral antigen 1                                      | 1 | 1 | 0 | 0 | 0 | 0 | 0 | 0 | hsa-miR-647 | -0.2 | N/A | Sites in UTR |
| KCNH1        | NM_002238    | potassium voltage-gated channel, subfamily H (eag-related), member 1     | 1 | 0 | 1 | 0 | 0 | 0 | 0 | 0 | hsa-miR-647 | -0.2 | N/A | Sites in UTR |
| STAT5A       | NM_003152    | signal transducer and activator of transcription 5A                      | 0 | 0 | 0 | 0 | 1 | 0 | 1 | 0 | hsa-miR-647 | -0.2 | N/A | Sites in UTR |



|         |              |                                                       |   |   |   |   |   |   |   |   |             |      |     |              |
|---------|--------------|-------------------------------------------------------|---|---|---|---|---|---|---|---|-------------|------|-----|--------------|
| TMEM70  | NM_001040613 | transmembrane protein 70                              | 0 | 0 | 0 | 0 | 1 | 0 | 1 | 0 | hsa-miR-647 | -0.2 | N/A | Sites in UTR |
| URM1    | NM_001135947 | ubiquitin related modifier 1                          | 0 | 0 | 0 | 0 | 1 | 0 | 1 | 0 | hsa-miR-647 | -0.2 | N/A | Sites in UTR |
| CCDC126 | NM_138771    | coiled-coil domain containing 126                     | 0 | 0 | 0 | 0 | 1 | 0 | 1 | 0 | hsa-miR-647 | -0.2 | N/A | Sites in UTR |
| EPB41L5 | NM_001184937 | erythrocyte membrane protein band 4.1 like 5          | 0 | 0 | 0 | 0 | 1 | 1 | 0 | 0 | hsa-miR-647 | -0.2 | N/A | Sites in UTR |
| MAT1A   | NM_000429    | methionine adenosyltransferase I, alpha               | 0 | 0 | 0 | 0 | 2 | 0 | 2 | 0 | hsa-miR-647 | -0.2 | N/A | Sites in UTR |
| IQUB    | NM_178827    | IQ motif and ubiquitin domain containing              | 0 | 0 | 0 | 0 | 1 | 0 | 0 | 1 | hsa-miR-647 | -0.2 | N/A | Sites in UTR |
| MAGEA6  | NM_005363    | melanoma antigen family A, 6                          | 0 | 0 | 0 | 0 | 1 | 0 | 1 | 0 | hsa-miR-647 | -0.2 | N/A | Sites in UTR |
| KRT38   | NM_006771    | keratin 38                                            | 0 | 0 | 0 | 0 | 1 | 0 | 1 | 0 | hsa-miR-647 | -0.2 | N/A | Sites in UTR |
| CYP2S1  | NM_030622    | cytochrome P450, family 2, subfamily S, polypeptide 1 | 1 | 0 | 1 | 0 | 0 | 0 | 0 | 0 | hsa-miR-647 | -0.2 | N/A | Sites in UTR |
| NT5M    | NM_020201    | 5',3'-nucleotidase, mitochondrial                     | 0 | 0 | 0 | 0 | 1 | 0 | 1 | 0 | hsa-miR-647 | -0.2 | N/A | Sites in UTR |
| SYTL4   | NM_001129896 | synaptotagmin-like 4                                  | 0 | 0 | 0 | 0 | 1 | 0 | 1 | 0 | hsa-miR-647 | -0.2 | N/A | Sites in UTR |
| STX1A   | NM_001165903 | syntaxin 1A (brain)                                   | 1 | 0 | 1 | 0 | 1 | 0 | 1 | 0 | hsa-miR-647 | -0.2 | N/A | Sites in UTR |
| CLMN    | NM_024734    | calmin (calponin-like, transmembrane)                 | 0 | 0 | 0 | 0 | 3 | 0 | 2 | 1 | hsa-miR-647 | -0.2 | N/A | Sites in UTR |
| CPT2    | NM_000098    | carnitine palmitoyltransferase 2                      | 1 | 0 | 1 | 0 | 0 | 0 | 0 | 0 | hsa-miR-647 | -0.2 | N/A | Sites in UTR |
| PEG3    | NM_001146184 | paternally expressed 3                                | 0 | 0 | 0 | 0 | 1 | 0 | 1 | 0 | hsa-miR-647 | -0.2 | N/A | Sites in UTR |
| PFKP    | NM_001242339 | phosphofructokinase, platelet                         | 0 | 0 | 0 | 0 | 1 | 0 | 1 | 0 | hsa-miR-647 | -0.2 | N/A | Sites in UTR |
| SFRP1   | NM_003012    | secreted frizzled-related protein 1                   | 0 | 0 | 0 | 0 | 1 | 0 | 1 | 0 | hsa-miR-647 | -0.2 | N/A | Sites in UTR |
| POFUT2  | NM_015227    | protein O-fucosyltransferase 2                        | 0 | 0 | 0 | 0 | 1 | 0 | 1 | 0 | hsa-miR-647 | -0.2 | N/A | Sites in UTR |

|          |              |                                                   |   |   |   |   |   |   |   |   |             |      |     |              |
|----------|--------------|---------------------------------------------------|---|---|---|---|---|---|---|---|-------------|------|-----|--------------|
| SYPL2    | NM_001040709 | synaptophysin-like 2                              | 0 | 0 | 0 | 0 | 1 | 0 | 1 | 0 | hsa-miR-647 | -0.2 | N/A | Sites in UTR |
| ANGPTL1  | NM_004673    | angiotensin-like 1                                | 0 | 0 | 0 | 0 | 1 | 0 | 0 | 1 | hsa-miR-647 | -0.2 | N/A | Sites in UTR |
| FAM116A  | NM_152678    | family with sequence similarity 116, member A     | 0 | 0 | 0 | 0 | 1 | 0 | 0 | 1 | hsa-miR-647 | -0.2 | N/A | Sites in UTR |
| AP3B2    | NM_004644    | adaptor-related protein complex 3, beta 2 subunit | 0 | 0 | 0 | 0 | 1 | 0 | 1 | 0 | hsa-miR-647 | -0.2 | N/A | Sites in UTR |
| SEC61A2  | NM_001142628 | Sec61 alpha 2 subunit (S. cerevisiae)             | 0 | 0 | 0 | 0 | 1 | 0 | 1 | 0 | hsa-miR-647 | -0.2 | N/A | Sites in UTR |
| FAHD1    | NM_001018104 | fumarylacetoacetate hydrolase domain containing 1 | 0 | 0 | 0 | 0 | 1 | 0 | 1 | 0 | hsa-miR-647 | -0.2 | N/A | Sites in UTR |
| FADS6    | NM_178128    | fatty acid desaturase domain family, member 6     | 0 | 0 | 0 | 0 | 2 | 0 | 1 | 1 | hsa-miR-647 | -0.2 | N/A | Sites in UTR |
| ESPNL    | NM_194312    | espin-like                                        | 0 | 0 | 0 | 0 | 2 | 0 | 2 | 0 | hsa-miR-647 | -0.2 | N/A | Sites in UTR |
| STARD3NL | NM_032016    | STARD3 N-terminal like                            | 0 | 0 | 0 | 0 | 1 | 0 | 0 | 1 | hsa-miR-647 | -0.2 | N/A | Sites in UTR |
| MAGEA3   | NM_005362    | melanoma antigen family A, 3                      | 0 | 0 | 0 | 0 | 1 | 0 | 1 | 0 | hsa-miR-647 | -0.2 | N/A | Sites in UTR |
| MAGEA12  | NM_001166386 | melanoma antigen family A, 12                     | 0 | 0 | 0 | 0 | 1 | 0 | 1 | 0 | hsa-miR-647 | -0.2 | N/A | Sites in UTR |
| RPL28    | NM_000991    | ribosomal protein L28                             | 0 | 0 | 0 | 0 | 1 | 0 | 1 | 0 | hsa-miR-647 | -0.2 | N/A | Sites in UTR |
| KCNK7    | NM_005714    | potassium channel, subfamily K, member 7          | 0 | 0 | 0 | 0 | 1 | 0 | 1 | 0 | hsa-miR-647 | -0.2 | N/A | Sites in UTR |
| MOSPD3   | NM_001040097 | motile sperm domain containing 3                  | 0 | 0 | 0 | 0 | 1 | 0 | 1 | 0 | hsa-miR-647 | -0.2 | N/A | Sites in UTR |
| C1orf35  | NM_024319    | chromosome 1 open reading frame 35                | 0 | 0 | 0 | 0 | 1 | 0 | 1 | 0 | hsa-miR-647 | -0.2 | N/A | Sites in UTR |
| MFSD9    | NM_032718    | major facilitator superfamily domain containing 9 | 0 | 0 | 0 | 0 | 1 | 0 | 1 | 0 | hsa-miR-647 | -0.2 | N/A | Sites in UTR |
| C15orf42 | NM_152259    | chromosome 15 open reading frame 42               | 0 | 0 | 0 | 0 | 1 | 0 | 1 | 0 | hsa-miR-647 | -0.2 | N/A | Sites in UTR |
| RIPPLY1  | NM_001171706 | rippy1 homolog (zebrafish)                        | 0 | 0 | 0 | 0 | 1 | 0 | 1 | 0 | hsa-miR-647 | -0.2 | N/A | Sites in UTR |

|          |              |                                                              |   |   |   |   |   |   |   |   |             |      |     |              |
|----------|--------------|--------------------------------------------------------------|---|---|---|---|---|---|---|---|-------------|------|-----|--------------|
| PASD1    | NM_173493    | PAS domain containing 1                                      | 0 | 0 | 0 | 0 | 1 | 0 | 1 | 0 | hsa-miR-647 | -0.2 | N/A | Sites in UTR |
| CGNL1    | NM_032866    | cingulin-like 1                                              | 0 | 0 | 0 | 0 | 2 | 0 | 1 | 1 | hsa-miR-647 | -0.2 | N/A | Sites in UTR |
| TRMT61A  | NM_152307    | tRNA methyltransferase 61 homolog A ( <i>S. cerevisiae</i> ) | 0 | 0 | 0 | 0 | 2 | 1 | 1 | 0 | hsa-miR-647 | -0.2 | N/A | Sites in UTR |
| PIGY     | NM_032906    | phosphatidylinositol glycan anchor biosynthesis, class Y     | 0 | 0 | 0 | 0 | 1 | 0 | 0 | 1 | hsa-miR-647 | -0.2 | N/A | Sites in UTR |
| RSPRY1   | NM_133368    | ring finger and SPRY domain containing 1                     | 0 | 0 | 0 | 0 | 1 | 0 | 0 | 1 | hsa-miR-647 | -0.2 | N/A | Sites in UTR |
| CXorf59  | NM_173695    | chromosome X open reading frame 59                           | 0 | 0 | 0 | 0 | 1 | 0 | 0 | 1 | hsa-miR-647 | -0.2 | N/A | Sites in UTR |
| ADCY7    | NM_001114    | adenylate cyclase 7                                          | 0 | 0 | 0 | 0 | 1 | 0 | 1 | 0 | hsa-miR-647 | -0.2 | N/A | Sites in UTR |
| T        | NM_003181    | T, brachyury homolog (mouse)                                 | 0 | 0 | 0 | 0 | 1 | 0 | 1 | 0 | hsa-miR-647 | -0.2 | N/A | Sites in UTR |
| KIAA0040 | NM_001162893 | KIAA0040                                                     | 0 | 0 | 0 | 0 | 2 | 0 | 2 | 0 | hsa-miR-647 | -0.2 | N/A | Sites in UTR |
| HGS      | NM_004712    | hepatocyte growth factor-regulated tyrosine kinase substrate | 0 | 0 | 0 | 0 | 2 | 0 | 1 | 1 | hsa-miR-647 | -0.2 | N/A | Sites in UTR |
| HAPLN1   | NM_001884    | hyaluronan and proteoglycan link protein 1                   | 1 | 0 | 1 | 0 | 0 | 0 | 0 | 0 | hsa-miR-647 | -0.2 | N/A | Sites in UTR |
| TEK      | NM_000459    | TEK tyrosine kinase, endothelial                             | 0 | 0 | 0 | 0 | 1 | 0 | 1 | 0 | hsa-miR-647 | -0.2 | N/A | Sites in UTR |
| TTC4     | NM_004623    | tetratricopeptide repeat domain 4                            | 1 | 0 | 1 | 0 | 0 | 0 | 0 | 0 | hsa-miR-647 | -0.2 | N/A | Sites in UTR |
| DNAJC11  | NM_018198    | DnaJ (Hsp40) homolog, subfamily C, member 11                 | 0 | 0 | 0 | 0 | 1 | 0 | 1 | 0 | hsa-miR-647 | -0.2 | N/A | Sites in UTR |
| ELMO3    | NM_024712    | engulfment and cell motility 3                               | 0 | 0 | 0 | 0 | 1 | 0 | 1 | 0 | hsa-miR-647 | -0.2 | N/A | Sites in UTR |
| SPATA13  | NM_001166271 | spermatogenesis associated 13                                | 0 | 0 | 0 | 0 | 2 | 0 | 0 | 2 | hsa-miR-647 | -0.2 | N/A | Sites in UTR |
| KIAA1462 | NM_020848    | KIAA1462                                                     | 0 | 0 | 0 | 0 | 2 | 1 | 0 | 1 | hsa-miR-647 | -0.2 | N/A | Sites in UTR |
| EIF4A2   | NM_001967    | eukaryotic translation initiation factor 4A2                 | 1 | 0 | 0 | 1 | 0 | 0 | 0 | 0 | hsa-miR-647 | -0.2 | N/A | Sites in UTR |

|         |              |                                                                                                 |   |   |   |   |   |   |   |   |             |      |     |              |
|---------|--------------|-------------------------------------------------------------------------------------------------|---|---|---|---|---|---|---|---|-------------|------|-----|--------------|
| TEX15   | NM_031271    | testis expressed 15                                                                             | 0 | 0 | 0 | 0 | 1 | 0 | 0 | 1 | hsa-miR-647 | -0.2 | N/A | Sites in UTR |
| ZNF765  | NM_001040185 | zinc finger protein 765                                                                         | 0 | 0 | 0 | 0 | 1 | 0 | 0 | 1 | hsa-miR-647 | -0.2 | N/A | Sites in UTR |
| MAP4    | NM_030885    | microtubule-associated protein 4                                                                | 0 | 0 | 0 | 0 | 1 | 0 | 1 | 0 | hsa-miR-647 | -0.2 | N/A | Sites in UTR |
| BCL2L11 | NM_001204106 | BCL2-like 11 (apoptosis facilitator)                                                            | 0 | 0 | 0 | 0 | 1 | 0 | 1 | 0 | hsa-miR-647 | -0.2 | N/A | Sites in UTR |
| RBPJL   | NM_014276    | recombination signal binding protein for immunoglobulin kappa J region-like                     | 0 | 0 | 0 | 0 | 1 | 0 | 1 | 0 | hsa-miR-647 | -0.2 | N/A | Sites in UTR |
| NTSR2   | NM_012344    | neurotensin receptor 2                                                                          | 0 | 0 | 0 | 0 | 1 | 0 | 1 | 0 | hsa-miR-647 | -0.2 | N/A | Sites in UTR |
| SOCS4   | NM_080867    | suppressor of cytokine signaling 4                                                              | 0 | 0 | 0 | 0 | 1 | 0 | 1 | 0 | hsa-miR-647 | -0.2 | N/A | Sites in UTR |
| ARFIP2  | NM_001242854 | ADP-ribosylation factor interacting protein 2                                                   | 1 | 0 | 0 | 1 | 1 | 0 | 0 | 1 | hsa-miR-647 | -0.2 | N/A | Sites in UTR |
| SLC26A1 | NM_022042    | solute carrier family 26 (sulfate transporter), member 1                                        | 0 | 0 | 0 | 0 | 1 | 1 | 0 | 0 | hsa-miR-647 | -0.2 | N/A | Sites in UTR |
| FAM125B | NM_001011703 | family with sequence similarity 125, member B                                                   | 0 | 0 | 0 | 0 | 1 | 0 | 0 | 1 | hsa-miR-647 | -0.2 | N/A | Sites in UTR |
| PIK3AP1 | NM_152309    | phosphoinositide-3-kinase adaptor protein 1                                                     | 0 | 0 | 0 | 0 | 1 | 0 | 0 | 1 | hsa-miR-647 | -0.2 | N/A | Sites in UTR |
| HSD11B1 | NM_001206741 | hydroxysteroid (11-beta) dehydrogenase 1                                                        | 0 | 0 | 0 | 0 | 1 | 0 | 1 | 0 | hsa-miR-647 | -0.2 | N/A | Sites in UTR |
| CEACAM6 | NM_002483    | carcinoembryonic antigen-related cell adhesion molecule 6 (non-specific cross reacting antigen) | 0 | 0 | 0 | 0 | 1 | 0 | 1 | 0 | hsa-miR-647 | -0.2 | N/A | Sites in UTR |
| OPHN1   | NM_002547    | oligophrenin 1                                                                                  | 0 | 0 | 0 | 0 | 1 | 0 | 1 | 0 | hsa-miR-647 | -0.2 | N/A | Sites in UTR |
| PDE6D   | NM_002601    | phosphodiesterase 6D, cGMP-specific, rod, delta                                                 | 0 | 0 | 0 | 0 | 1 | 0 | 1 | 0 | hsa-miR-647 | -0.2 | N/A | Sites in UTR |
| PDE7A   | NM_001242318 | phosphodiesterase 7A                                                                            | 0 | 0 | 0 | 0 | 1 | 0 | 1 | 0 | hsa-miR-647 | -0.2 | N/A | Sites in UTR |
| SPG7    | NM_199367    | spastic paraplegia 7 (pure and complicated autosomal recessive)                                 | 0 | 0 | 0 | 0 | 1 | 0 | 1 | 0 | hsa-miR-647 | -0.2 | N/A | Sites in UTR |
| KAT6B   | NM_012330    | K(lysine) acetyltransferase 6B                                                                  | 0 | 0 | 0 | 0 | 1 | 0 | 1 | 0 | hsa-miR-647 | -0.2 | N/A | Sites in UTR |

|         |              |                                                                                                    |   |   |   |   |   |   |   |   |             |       |     |              |
|---------|--------------|----------------------------------------------------------------------------------------------------|---|---|---|---|---|---|---|---|-------------|-------|-----|--------------|
| NKIRAS2 | NM_001001349 | NFKB inhibitor interacting Ras-like 2                                                              | 0 | 0 | 0 | 0 | 1 | 0 | 1 | 0 | hsa-miR-647 | -0.2  | N/A | Sites in UTR |
| ALG12   | NM_024105    | asparagine-linked glycosylation 12, alpha-1,6-mannosyltransferase homolog ( <i>S. cerevisiae</i> ) | 0 | 0 | 0 | 0 | 1 | 0 | 1 | 0 | hsa-miR-647 | -0.2  | N/A | Sites in UTR |
| KCNJ14  | NM_013348    | potassium inwardly-rectifying channel, subfamily J, member 14                                      | 0 | 0 | 0 | 0 | 2 | 0 | 0 | 2 | hsa-miR-647 | -0.2  | N/A | Sites in UTR |
| ZNF512B | NM_020713    | zinc finger protein 512B                                                                           | 0 | 0 | 0 | 0 | 2 | 0 | 2 | 0 | hsa-miR-647 | -0.2  | N/A | Sites in UTR |
| SMU1    | NM_018225    | smu-1 suppressor of mec-8 and unc-52 homolog ( <i>C. elegans</i> )                                 | 0 | 0 | 0 | 0 | 2 | 0 | 2 | 0 | hsa-miR-647 | -0.2  | N/A | Sites in UTR |
| JMY     | NM_152405    | junction mediating and regulatory protein, p53 cofactor                                            | 0 | 0 | 0 | 0 | 2 | 0 | 2 | 0 | hsa-miR-647 | -0.19 | N/A | Sites in UTR |
| GOSR1   | NM_001007024 | golgi SNAP receptor complex member 1                                                               | 0 | 0 | 0 | 0 | 2 | 1 | 1 | 0 | hsa-miR-647 | -0.19 | N/A | Sites in UTR |
| BSN     | NM_003458    | bassoon (presynaptic cytomatrix protein)                                                           | 0 | 0 | 0 | 0 | 3 | 0 | 2 | 1 | hsa-miR-647 | -0.19 | N/A | Sites in UTR |
| MGLL    | NM_001003794 | monoglyceride lipase                                                                               | 0 | 0 | 0 | 0 | 3 | 0 | 2 | 1 | hsa-miR-647 | -0.19 | N/A | Sites in UTR |
| FBN1    | NM_000138    | fibrillin 1                                                                                        | 0 | 0 | 0 | 0 | 1 | 0 | 0 | 1 | hsa-miR-647 | -0.19 | N/A | Sites in UTR |
| SUCLG1  | NM_003849    | succinate-CoA ligase, alpha subunit                                                                | 0 | 0 | 0 | 0 | 1 | 0 | 0 | 1 | hsa-miR-647 | -0.19 | N/A | Sites in UTR |
| CHST9   | NM_031422    | carbohydrate (N-acetylgalactosamine 4-O) sulfotransferase 9                                        | 0 | 0 | 0 | 0 | 1 | 0 | 0 | 1 | hsa-miR-647 | -0.19 | N/A | Sites in UTR |
| PNP     | NM_000270    | purine nucleoside phosphorylase                                                                    | 0 | 0 | 0 | 0 | 1 | 0 | 1 | 0 | hsa-miR-647 | -0.19 | N/A | Sites in UTR |
| HS3ST4  | NM_006040    | heparan sulfate (glucosamine) 3-O-sulfotransferase 4                                               | 0 | 0 | 0 | 0 | 1 | 0 | 1 | 0 | hsa-miR-647 | -0.19 | N/A | Sites in UTR |
| STON1   | NM_001198595 | stonin 1                                                                                           | 0 | 0 | 0 | 0 | 1 | 0 | 1 | 0 | hsa-miR-647 | -0.19 | N/A | Sites in UTR |
| SH3BP4  | NM_014521    | SH3-domain binding protein 4                                                                       | 0 | 0 | 0 | 0 | 1 | 0 | 1 | 0 | hsa-miR-647 | -0.19 | N/A | Sites in UTR |
| ZNF607  | NM_001172677 | zinc finger protein 607                                                                            | 0 | 0 | 0 | 0 | 1 | 0 | 1 | 0 | hsa-miR-647 | -0.19 | N/A | Sites in UTR |
| ZNF48   | NM_001214906 | zinc finger protein 48                                                                             | 0 | 0 | 0 | 0 | 1 | 0 | 1 | 0 | hsa-miR-647 | -0.19 | N/A | Sites in UTR |

|         |              |                                                                     |   |   |   |   |   |   |   |   |             |       |     |              |
|---------|--------------|---------------------------------------------------------------------|---|---|---|---|---|---|---|---|-------------|-------|-----|--------------|
| S100A7A | NM_176823    | S100 calcium binding protein A7A                                    | 0 | 0 | 0 | 0 | 1 | 0 | 1 | 0 | hsa-miR-647 | -0.19 | N/A | Sites in UTR |
| RPP14   | NM_001098783 | ribonuclease P/MRP 14kDa subunit                                    | 0 | 0 | 0 | 0 | 2 | 0 | 0 | 2 | hsa-miR-647 | -0.19 | N/A | Sites in UTR |
| ARHGEF9 | NM_001173479 | Cdc42 guanine nucleotide exchange factor (GEF) 9                    | 0 | 0 | 0 | 0 | 2 | 0 | 1 | 1 | hsa-miR-647 | -0.19 | N/A | Sites in UTR |
| CACNA1I | NM_001003406 | calcium channel, voltage-dependent, T type, alpha 1I subunit        | 0 | 0 | 0 | 0 | 2 | 0 | 2 | 0 | hsa-miR-647 | -0.19 | N/A | Sites in UTR |
| MYOT    | NM_001135940 | myotilin                                                            | 0 | 0 | 0 | 0 | 1 | 0 | 0 | 1 | hsa-miR-647 | -0.19 | N/A | Sites in UTR |
| CYTIP   | NM_004288    | cytohesin 1 interacting protein                                     | 0 | 0 | 0 | 0 | 1 | 0 | 0 | 1 | hsa-miR-647 | -0.19 | N/A | Sites in UTR |
| EIF2B1  | NM_001414    | eukaryotic translation initiation factor 2B, subunit 1 alpha, 26kDa | 0 | 0 | 0 | 0 | 1 | 0 | 1 | 0 | hsa-miR-647 | -0.19 | N/A | Sites in UTR |
| USP35   | NM_020798    | ubiquitin specific peptidase 35                                     | 0 | 0 | 0 | 0 | 1 | 0 | 1 | 0 | hsa-miR-647 | -0.19 | N/A | Sites in UTR |
| PGAP1   | NM_024989    | post-GPI attachment to proteins 1                                   | 0 | 0 | 0 | 0 | 1 | 0 | 1 | 0 | hsa-miR-647 | -0.19 | N/A | Sites in UTR |
| BMP8A   | NM_181809    | bone morphogenetic protein 8a                                       | 0 | 0 | 0 | 0 | 1 | 0 | 1 | 0 | hsa-miR-647 | -0.19 | N/A | Sites in UTR |
| ATG13   | NM_001142673 | ATG13 autophagy related 13 homolog (S. cerevisiae)                  | 0 | 0 | 0 | 0 | 2 | 1 | 1 | 0 | hsa-miR-647 | -0.19 | N/A | Sites in UTR |
| GPT2    | NM_001142466 | glutamic pyruvate transaminase (alanine aminotransferase) 2         | 0 | 0 | 0 | 0 | 2 | 1 | 1 | 0 | hsa-miR-647 | -0.19 | N/A | Sites in UTR |
| PRKAA1  | NM_006251    | protein kinase, AMP-activated, alpha 1 catalytic subunit            | 0 | 0 | 0 | 0 | 1 | 0 | 0 | 1 | hsa-miR-647 | -0.19 | N/A | Sites in UTR |
| AP4S1   | NM_001128126 | adaptor-related protein complex 4, sigma 1 subunit                  | 0 | 0 | 0 | 0 | 1 | 0 | 0 | 1 | hsa-miR-647 | -0.19 | N/A | Sites in UTR |
| KDM5A   | NM_001042603 | lysine (K)-specific demethylase 5A                                  | 0 | 0 | 0 | 0 | 2 | 0 | 1 | 1 | hsa-miR-647 | -0.19 | N/A | Sites in UTR |
| COL16A1 | NM_001856    | collagen, type XVI, alpha 1                                         | 0 | 0 | 0 | 0 | 1 | 0 | 1 | 0 | hsa-miR-647 | -0.19 | N/A | Sites in UTR |
| L1CAM   | NM_000425    | L1 cell adhesion molecule                                           | 0 | 0 | 0 | 0 | 1 | 0 | 1 | 0 | hsa-miR-647 | -0.19 | N/A | Sites in UTR |
| MAGEA2  | NM_005361    | melanoma antigen family A, 2                                        | 0 | 0 | 0 | 0 | 1 | 0 | 1 | 0 | hsa-miR-647 | -0.19 | N/A | Sites in UTR |

|          |              |                                                                      |   |   |   |   |   |   |   |   |             |       |     |              |
|----------|--------------|----------------------------------------------------------------------|---|---|---|---|---|---|---|---|-------------|-------|-----|--------------|
| ZNF24    | NM_006965    | zinc finger protein 24                                               | 0 | 0 | 0 | 0 | 1 | 0 | 1 | 0 | hsa-miR-647 | -0.19 | N/A | Sites in UTR |
| FGF19    | NM_005117    | fibroblast growth factor 19                                          | 0 | 0 | 0 | 0 | 1 | 0 | 1 | 0 | hsa-miR-647 | -0.19 | N/A | Sites in UTR |
| TRIM17   | NM_001024940 | tripartite motif containing 17                                       | 0 | 0 | 0 | 0 | 1 | 0 | 1 | 0 | hsa-miR-647 | -0.19 | N/A | Sites in UTR |
| MAGEA2B  | NM_153488    | melanoma antigen family A, 2B                                        | 0 | 0 | 0 | 0 | 1 | 0 | 1 | 0 | hsa-miR-647 | -0.19 | N/A | Sites in UTR |
| C22orf29 | NM_024627    | chromosome 22 open reading frame 29                                  | 0 | 0 | 0 | 0 | 2 | 0 | 1 | 1 | hsa-miR-647 | -0.19 | N/A | Sites in UTR |
| IL8      | NM_000584    | interleukin 8                                                        | 0 | 0 | 0 | 0 | 1 | 0 | 0 | 1 | hsa-miR-647 | -0.19 | N/A | Sites in UTR |
| ITGA4    | NM_000885    | integrin, alpha 4 (antigen CD49D, alpha 4 subunit of VLA-4 receptor) | 0 | 0 | 0 | 0 | 1 | 0 | 0 | 1 | hsa-miR-647 | -0.19 | N/A | Sites in UTR |
| AP1B1    | NM_001127    | adaptor-related protein complex 1, beta 1 subunit                    | 0 | 0 | 0 | 0 | 1 | 0 | 1 | 0 | hsa-miR-647 | -0.19 | N/A | Sites in UTR |
| ANXA13   | NM_001003954 | annexin A13                                                          | 0 | 0 | 0 | 0 | 1 | 0 | 1 | 0 | hsa-miR-647 | -0.19 | N/A | Sites in UTR |
| CLTC     | NM_004859    | clathrin, heavy chain (Hc)                                           | 0 | 0 | 0 | 0 | 1 | 0 | 1 | 0 | hsa-miR-647 | -0.19 | N/A | Sites in UTR |
| KALRN    | NM_001024660 | kalirin, RhoGEF kinase                                               | 1 | 0 | 1 | 0 | 0 | 0 | 0 | 0 | hsa-miR-647 | -0.19 | N/A | Sites in UTR |
| RPP30    | NM_001104546 | ribonuclease P/MRP 30kDa subunit                                     | 0 | 0 | 0 | 0 | 1 | 0 | 1 | 0 | hsa-miR-647 | -0.19 | N/A | Sites in UTR |
| MYO15A   | NM_016239    | myosin XVA                                                           | 0 | 0 | 0 | 0 | 1 | 0 | 1 | 0 | hsa-miR-647 | -0.19 | N/A | Sites in UTR |
| C19orf10 | NM_019107    | chromosome 19 open reading frame 10                                  | 0 | 0 | 0 | 0 | 1 | 0 | 1 | 0 | hsa-miR-647 | -0.19 | N/A | Sites in UTR |
| PARD6G   | NM_032510    | par-6 partitioning defective 6 homolog gamma (C. elegans)            | 0 | 0 | 0 | 0 | 1 | 0 | 1 | 0 | hsa-miR-647 | -0.19 | N/A | Sites in UTR |
| ATPAF2   | NM_145691    | ATP synthase mitochondrial F1 complex assembly factor 2              | 0 | 0 | 0 | 0 | 1 | 0 | 1 | 0 | hsa-miR-647 | -0.19 | N/A | Sites in UTR |
| ANKRD22  | NM_144590    | ankyrin repeat domain 22                                             | 0 | 0 | 0 | 0 | 1 | 0 | 1 | 0 | hsa-miR-647 | -0.19 | N/A | Sites in UTR |
| MTMR6    | NM_004685    | myotubularin related protein 6                                       | 1 | 0 | 0 | 1 | 0 | 0 | 0 | 0 | hsa-miR-647 | -0.19 | N/A | Sites in UTR |

|         |              |                                                                               |   |   |   |   |   |   |   |   |             |       |     |              |
|---------|--------------|-------------------------------------------------------------------------------|---|---|---|---|---|---|---|---|-------------|-------|-----|--------------|
| MGEA5   | NM_001142434 | meningioma expressed antigen 5 (hyaluronidase)                                | 0 | 0 | 0 | 0 | 1 | 0 | 0 | 1 | hsa-miR-647 | -0.19 | N/A | Sites in UTR |
| PPDC    | NM_021823    | phosphopantothenoylcysteine decarboxylase                                     | 0 | 0 | 0 | 0 | 1 | 0 | 1 | 0 | hsa-miR-647 | -0.19 | N/A | Sites in UTR |
| TANC2   | NM_025185    | tetratricopeptide repeat, ankyrin repeat and coiled-coil containing 2         | 0 | 0 | 0 | 0 | 2 | 0 | 1 | 1 | hsa-miR-647 | -0.19 | N/A | Sites in UTR |
| PAFAH2  | NM_000437    | platelet-activating factor acetylhydrolase 2, 40kDa                           | 0 | 0 | 0 | 0 | 1 | 0 | 0 | 1 | hsa-miR-647 | -0.19 | N/A | Sites in UTR |
| ZNF770  | NM_014106    | zinc finger protein 770                                                       | 0 | 0 | 0 | 0 | 1 | 0 | 0 | 1 | hsa-miR-647 | -0.19 | N/A | Sites in UTR |
| ENSA    | NM_004436    | endosulfine alpha                                                             | 0 | 0 | 0 | 0 | 1 | 0 | 1 | 0 | hsa-miR-647 | -0.19 | N/A | Sites in UTR |
| IKBKE   | NM_001193321 | inhibitor of kappa light polypeptide gene enhancer in B-cells, kinase epsilon | 0 | 0 | 0 | 0 | 1 | 0 | 1 | 0 | hsa-miR-647 | -0.19 | N/A | Sites in UTR |
| NCOA5   | NM_020967    | nuclear receptor coactivator 5                                                | 0 | 0 | 0 | 0 | 1 | 0 | 1 | 0 | hsa-miR-647 | -0.19 | N/A | Sites in UTR |
| PVRL4   | NM_030916    | poliovirus receptor-related 4                                                 | 0 | 0 | 0 | 0 | 1 | 0 | 1 | 0 | hsa-miR-647 | -0.19 | N/A | Sites in UTR |
| FAM59B  | NM_001168241 | family with sequence similarity 59, member B                                  | 0 | 0 | 0 | 0 | 1 | 0 | 1 | 0 | hsa-miR-647 | -0.19 | N/A | Sites in UTR |
| PPIL6   | NM_001111298 | peptidylprolyl isomerase (cyclophilin)-like 6                                 | 1 | 0 | 1 | 0 | 0 | 0 | 0 | 0 | hsa-miR-647 | -0.19 | N/A | Sites in UTR |
| KLF12   | NM_007249    | Kruppel-like factor 12                                                        | 0 | 0 | 0 | 0 | 2 | 0 | 2 | 0 | hsa-miR-647 | -0.19 | N/A | Sites in UTR |
| SLC35E2 | NM_182838    | solute carrier family 35, member E2                                           | 0 | 0 | 0 | 0 | 2 | 0 | 1 | 1 | hsa-miR-647 | -0.19 | N/A | Sites in UTR |
| SUMO2   | NM_001005849 | SMT3 suppressor of mif two 3 homolog 2 ( <i>S. cerevisiae</i> )               | 0 | 0 | 0 | 0 | 1 | 0 | 0 | 1 | hsa-miR-647 | -0.19 | N/A | Sites in UTR |
| HTR3D   | NM_001145143 | 5-hydroxytryptamine (serotonin) receptor 3 family member D                    | 0 | 0 | 0 | 0 | 1 | 0 | 0 | 1 | hsa-miR-647 | -0.19 | N/A | Sites in UTR |
| SKA2    | NM_001100595 | spindle and kinetochore associated complex subunit 2                          | 0 | 0 | 0 | 0 | 1 | 0 | 0 | 1 | hsa-miR-647 | -0.19 | N/A | Sites in UTR |
| N4BP1   | NM_153029    | NEDD4 binding protein 1                                                       | 0 | 0 | 0 | 0 | 1 | 0 | 1 | 0 | hsa-miR-647 | -0.19 | N/A | Sites in UTR |
| SGK2    | NM_001199264 | serum/glucocorticoid regulated kinase 2                                       | 0 | 0 | 0 | 0 | 1 | 0 | 1 | 0 | hsa-miR-647 | -0.19 | N/A | Sites in UTR |



|          |              |                                                            |   |   |   |   |   |   |   |   |             |       |     |              |
|----------|--------------|------------------------------------------------------------|---|---|---|---|---|---|---|---|-------------|-------|-----|--------------|
| RASGRP3  | NM_001139488 | RAS guanyl releasing protein 3 (calcium and DAG-regulated) | 0 | 0 | 0 | 0 | 1 | 0 | 1 | 0 | hsa-miR-647 | -0.19 | N/A | Sites in UTR |
| C12orf23 | NM_152261    | chromosome 12 open reading frame 23                        | 0 | 0 | 0 | 0 | 1 | 0 | 1 | 0 | hsa-miR-647 | -0.19 | N/A | Sites in UTR |
| SPSB4    | NM_080862    | splA/ryanodine receptor domain and SOCS box containing 4   | 0 | 0 | 0 | 0 | 1 | 0 | 1 | 0 | hsa-miR-647 | -0.19 | N/A | Sites in UTR |
| CRAT     | NM_000755    | carnitine O-acetyltransferase                              | 0 | 0 | 0 | 0 | 2 | 0 | 0 | 2 | hsa-miR-647 | -0.19 | N/A | Sites in UTR |
| SESTD1   | NM_178123    | SEC14 and spectrin domains 1                               | 0 | 0 | 0 | 0 | 1 | 0 | 0 | 1 | hsa-miR-647 | -0.19 | N/A | Sites in UTR |
| OR52I2   | NM_001005170 | olfactory receptor, family 52, subfamily I, member 2       | 0 | 0 | 0 | 0 | 1 | 0 | 0 | 1 | hsa-miR-647 | -0.19 | N/A | Sites in UTR |
| SERPIN8  | NM_002640    | serpin peptidase inhibitor, clade B (ovalbumin), member 8  | 0 | 0 | 0 | 0 | 1 | 0 | 1 | 0 | hsa-miR-647 | -0.19 | N/A | Sites in UTR |
| ZNF646   | NM_014699    | zinc finger protein 646                                    | 0 | 0 | 0 | 0 | 1 | 0 | 1 | 0 | hsa-miR-647 | -0.19 | N/A | Sites in UTR |
| IGF2BP2  | NM_001007225 | insulin-like growth factor 2 mRNA binding protein 2        | 0 | 0 | 0 | 0 | 1 | 0 | 1 | 0 | hsa-miR-647 | -0.19 | N/A | Sites in UTR |
| RIPK4    | NM_020639    | receptor-interacting serine-threonine kinase 4             | 0 | 0 | 0 | 0 | 1 | 0 | 1 | 0 | hsa-miR-647 | -0.19 | N/A | Sites in UTR |
| POLDIP3  | NM_032311    | polymerase (DNA-directed), delta interacting protein 3     | 1 | 0 | 1 | 0 | 1 | 0 | 1 | 0 | hsa-miR-647 | -0.19 | N/A | Sites in UTR |
| CADM3    | NM_001127173 | cell adhesion molecule 3                                   | 2 | 0 | 2 | 0 | 0 | 0 | 0 | 0 | hsa-miR-647 | -0.19 | N/A | Sites in UTR |
| GLTPD1   | NM_001029885 | glycolipid transfer protein domain containing 1            | 0 | 0 | 0 | 0 | 2 | 0 | 1 | 1 | hsa-miR-647 | -0.19 | N/A | Sites in UTR |
| IDS      | NM_000202    | iduronate 2-sulfatase                                      | 0 | 0 | 0 | 0 | 1 | 0 | 0 | 1 | hsa-miR-647 | -0.19 | N/A | Sites in UTR |
| GLS2     | NM_013267    | glutaminase 2 (liver, mitochondrial)                       | 0 | 0 | 0 | 0 | 1 | 0 | 0 | 1 | hsa-miR-647 | -0.19 | N/A | Sites in UTR |
| EML4     | NM_001145076 | echinoderm microtubule associated protein like 4           | 0 | 0 | 0 | 0 | 1 | 0 | 0 | 1 | hsa-miR-647 | -0.19 | N/A | Sites in UTR |
| ZNF280C  | NM_017666    | zinc finger protein 280C                                   | 0 | 0 | 0 | 0 | 1 | 0 | 0 | 1 | hsa-miR-647 | -0.19 | N/A | Sites in UTR |
| TMEM181  | NM_020823    | transmembrane protein 181                                  | 0 | 0 | 0 | 0 | 1 | 0 | 0 | 1 | hsa-miR-647 | -0.19 | N/A | Sites in UTR |

|         |              |                                                                       |   |   |   |   |   |   |   |   |             |       |     |              |
|---------|--------------|-----------------------------------------------------------------------|---|---|---|---|---|---|---|---|-------------|-------|-----|--------------|
| HCP5    | NM_006674    | HLA complex P5                                                        | 0 | 0 | 0 | 0 | 1 | 0 | 1 | 0 | hsa-miR-647 | -0.19 | N/A | Sites in UTR |
| P2RY13  | NM_176894    | purinergic receptor P2Y, G-protein coupled, 13                        | 0 | 0 | 0 | 0 | 1 | 0 | 1 | 0 | hsa-miR-647 | -0.19 | N/A | Sites in UTR |
| CCDC85C | NM_001144995 | coiled-coil domain containing 85C                                     | 0 | 0 | 0 | 0 | 2 | 1 | 1 | 0 | hsa-miR-647 | -0.19 | N/A | Sites in UTR |
| PER2    | NM_022817    | period homolog 2 (Drosophila)                                         | 0 | 0 | 0 | 0 | 3 | 0 | 2 | 1 | hsa-miR-647 | -0.19 | N/A | Sites in UTR |
| VAPB    | NM_001195677 | VAMP (vesicle-associated membrane protein)-associated protein B and C | 0 | 0 | 0 | 0 | 2 | 1 | 1 | 0 | hsa-miR-647 | -0.19 | N/A | Sites in UTR |
| TP53    | NM_000546    | tumor protein p53                                                     | 0 | 0 | 0 | 0 | 2 | 0 | 0 | 2 | hsa-miR-647 | -0.18 | N/A | Sites in UTR |
| MYO19   | NM_001163735 | myosin XIX                                                            | 0 | 0 | 0 | 0 | 1 | 0 | 0 | 1 | hsa-miR-647 | -0.18 | N/A | Sites in UTR |
| BTF3L4  | NM_001136497 | basic transcription factor 3-like 4                                   | 0 | 0 | 0 | 0 | 1 | 0 | 0 | 1 | hsa-miR-647 | -0.18 | N/A | Sites in UTR |
| TCEAL6  | NM_001006938 | transcription elongation factor A (SII)-like 6                        | 0 | 0 | 0 | 0 | 1 | 0 | 0 | 1 | hsa-miR-647 | -0.18 | N/A | Sites in UTR |
| SLC15A1 | NM_005073    | solute carrier family 15 (oligopeptide transporter), member 1         | 0 | 0 | 0 | 0 | 1 | 0 | 1 | 0 | hsa-miR-647 | -0.18 | N/A | Sites in UTR |
| TPR     | NM_003292    | translocated promoter region (to activated MET oncogene)              | 0 | 0 | 0 | 0 | 1 | 0 | 1 | 0 | hsa-miR-647 | -0.18 | N/A | Sites in UTR |
| ATRN    | NM_139321    | attractin                                                             | 1 | 0 | 1 | 0 | 0 | 0 | 0 | 0 | hsa-miR-647 | -0.18 | N/A | Sites in UTR |
| RNPS1   | NM_006711    | RNA binding protein S1, serine-rich domain                            | 0 | 0 | 0 | 0 | 1 | 0 | 1 | 0 | hsa-miR-647 | -0.18 | N/A | Sites in UTR |
| C3orf27 | NM_007354    | chromosome 3 open reading frame 27                                    | 0 | 0 | 0 | 0 | 1 | 0 | 1 | 0 | hsa-miR-647 | -0.18 | N/A | Sites in UTR |
| ZNF500  | NM_021646    | zinc finger protein 500                                               | 0 | 0 | 0 | 0 | 1 | 0 | 1 | 0 | hsa-miR-647 | -0.18 | N/A | Sites in UTR |
| ZDHHC11 | NM_024786    | zinc finger, DHHC-type containing 11                                  | 0 | 0 | 0 | 0 | 1 | 0 | 1 | 0 | hsa-miR-647 | -0.18 | N/A | Sites in UTR |
| H1FO    | NM_005318    | H1 histone family, member 0                                           | 1 | 0 | 0 | 1 | 1 | 0 | 1 | 0 | hsa-miR-647 | -0.18 | N/A | Sites in UTR |
| SUFU    | NM_016169    | suppressor of fused homolog (Drosophila)                              | 0 | 0 | 0 | 0 | 3 | 0 | 1 | 2 | hsa-miR-647 | -0.18 | N/A | Sites in UTR |

|         |              |                                                                           |   |   |   |   |   |   |   |   |             |       |     |              |
|---------|--------------|---------------------------------------------------------------------------|---|---|---|---|---|---|---|---|-------------|-------|-----|--------------|
| KCNJ16  | NM_018658    | potassium inwardly-rectifying channel, subfamily J, member 16             | 0 | 0 | 0 | 0 | 1 | 0 | 0 | 1 | hsa-miR-647 | -0.18 | N/A | Sites in UTR |
| CCDC28A | NM_015439    | coiled-coil domain containing 28A                                         | 0 | 0 | 0 | 0 | 1 | 0 | 0 | 1 | hsa-miR-647 | -0.18 | N/A | Sites in UTR |
| C7orf42 | NM_017994    | chromosome 7 open reading frame 42                                        | 1 | 0 | 0 | 1 | 0 | 0 | 0 | 0 | hsa-miR-647 | -0.18 | N/A | Sites in UTR |
| CELF4   | NM_001025087 | CUGBP, Elav-like family member 4                                          | 0 | 0 | 0 | 0 | 1 | 0 | 0 | 1 | hsa-miR-647 | -0.18 | N/A | Sites in UTR |
| TBL1XR1 | NM_024665    | transducin (beta)-like 1 X-linked receptor 1                              | 1 | 0 | 0 | 1 | 0 | 0 | 0 | 0 | hsa-miR-647 | -0.18 | N/A | Sites in UTR |
| FCRL3   | NM_052939    | Fc receptor-like 3                                                        | 0 | 0 | 0 | 0 | 1 | 0 | 0 | 1 | hsa-miR-647 | -0.18 | N/A | Sites in UTR |
| IDAS    | NM_001190787 | Idas protein                                                              | 0 | 0 | 0 | 0 | 1 | 0 | 0 | 1 | hsa-miR-647 | -0.18 | N/A | Sites in UTR |
| WNT8B   | NM_003393    | wingless-type MMTV integration site family, member 8B                     | 0 | 0 | 0 | 0 | 1 | 0 | 1 | 0 | hsa-miR-647 | -0.18 | N/A | Sites in UTR |
| EIF2S2  | NM_003908    | eukaryotic translation initiation factor 2, subunit 2 beta, 38kDa         | 0 | 0 | 0 | 0 | 1 | 0 | 1 | 0 | hsa-miR-647 | -0.18 | N/A | Sites in UTR |
| SGSM2   | NM_001098509 | small G protein signaling modulator 2                                     | 0 | 0 | 0 | 0 | 1 | 0 | 1 | 0 | hsa-miR-647 | -0.18 | N/A | Sites in UTR |
| OGFR    | NM_007346    | opioid growth factor receptor                                             | 0 | 0 | 0 | 0 | 1 | 0 | 1 | 0 | hsa-miR-647 | -0.18 | N/A | Sites in UTR |
| DSCAML1 | NM_020693    | Down syndrome cell adhesion molecule like 1                               | 0 | 0 | 0 | 0 | 1 | 0 | 1 | 0 | hsa-miR-647 | -0.18 | N/A | Sites in UTR |
| CSorf62 | NM_032947    | chromosome 5 open reading frame 62                                        | 0 | 0 | 0 | 0 | 1 | 0 | 1 | 0 | hsa-miR-647 | -0.18 | N/A | Sites in UTR |
| GRAMD2  | NM_001012642 | GRAM domain containing 2                                                  | 0 | 0 | 0 | 0 | 2 | 0 | 2 | 0 | hsa-miR-647 | -0.18 | N/A | Sites in UTR |
| NFATC4  | NM_001136022 | nuclear factor of activated T-cells, cytoplasmic, calcineurin-dependent 4 | 0 | 0 | 0 | 0 | 1 | 0 | 0 | 1 | hsa-miR-647 | -0.18 | N/A | Sites in UTR |
| CRB1    | NM_001193640 | crumbs homolog 1 (Drosophila)                                             | 0 | 0 | 0 | 0 | 1 | 0 | 0 | 1 | hsa-miR-647 | -0.18 | N/A | Sites in UTR |
| HEBP1   | NM_015987    | heme binding protein 1                                                    | 0 | 0 | 0 | 0 | 1 | 0 | 0 | 1 | hsa-miR-647 | -0.18 | N/A | Sites in UTR |
| PADI6   | NM_207421    | peptidyl arginine deiminase, type VI                                      | 0 | 0 | 0 | 0 | 1 | 0 | 0 | 1 | hsa-miR-647 | -0.18 | N/A | Sites in UTR |

|          |              |                                                                                           |   |   |   |   |   |   |   |   |             |       |     |              |
|----------|--------------|-------------------------------------------------------------------------------------------|---|---|---|---|---|---|---|---|-------------|-------|-----|--------------|
| ITGAV    | NM_001144999 | integrin, alpha V (vitronectin receptor, alpha polypeptide, antigen CD51)                 | 0 | 0 | 0 | 0 | 1 | 0 | 1 | 0 | hsa-miR-647 | -0.18 | N/A | Sites in UTR |
| MTR      | NM_000254    | 5-methyltetrahydrofolate-homocysteine methyltransferase                                   | 0 | 0 | 0 | 0 | 1 | 0 | 1 | 0 | hsa-miR-647 | -0.18 | N/A | Sites in UTR |
| PML      | NM_002675    | promyelocytic leukemia                                                                    | 0 | 0 | 0 | 0 | 1 | 0 | 1 | 0 | hsa-miR-647 | -0.18 | N/A | Sites in UTR |
| DISC1    | NM_001012958 | disrupted in schizophrenia 1                                                              | 0 | 0 | 0 | 0 | 1 | 0 | 1 | 0 | hsa-miR-647 | -0.18 | N/A | Sites in UTR |
| ZNF589   | NM_016089    | zinc finger protein 589                                                                   | 0 | 0 | 0 | 0 | 1 | 0 | 1 | 0 | hsa-miR-647 | -0.18 | N/A | Sites in UTR |
| CYP21A2  | NM_000500    | cytochrome P450, family 21, subfamily A, polypeptide 2                                    | 0 | 0 | 0 | 0 | 1 | 0 | 0 | 1 | hsa-miR-647 | -0.18 | N/A | Sites in UTR |
| PSMD11   | NM_002815    | proteasome (prosome, macropain) 26S subunit, non-ATPase, 11                               | 0 | 0 | 0 | 0 | 1 | 0 | 0 | 1 | hsa-miR-647 | -0.18 | N/A | Sites in UTR |
| KCNMB2   | NM_005832    | potassium large conductance calcium-activated channel, subfamily M, beta member 2         | 0 | 0 | 0 | 0 | 1 | 0 | 0 | 1 | hsa-miR-647 | -0.18 | N/A | Sites in UTR |
| IFNK     | NM_020124    | interferon, kappa                                                                         | 0 | 0 | 0 | 0 | 1 | 0 | 0 | 1 | hsa-miR-647 | -0.18 | N/A | Sites in UTR |
| ZNF474   | NM_207317    | zinc finger protein 474                                                                   | 0 | 0 | 0 | 0 | 1 | 0 | 0 | 1 | hsa-miR-647 | -0.18 | N/A | Sites in UTR |
| MCHR1    | NM_005297    | melanin-concentrating hormone receptor 1                                                  | 0 | 0 | 0 | 0 | 1 | 0 | 1 | 0 | hsa-miR-647 | -0.18 | N/A | Sites in UTR |
| PSMB8    | NM_004159    | proteasome (prosome, macropain) subunit, beta type, 8 (large multifunctional peptidase 7) | 0 | 0 | 0 | 0 | 1 | 0 | 1 | 0 | hsa-miR-647 | -0.18 | N/A | Sites in UTR |
| VAX2     | NM_012476    | ventral anterior homeobox 2                                                               | 0 | 0 | 0 | 0 | 1 | 0 | 1 | 0 | hsa-miR-647 | -0.18 | N/A | Sites in UTR |
| KCNK17   | NM_001135111 | potassium channel, subfamily K, member 17                                                 | 1 | 0 | 1 | 0 | 0 | 0 | 0 | 0 | hsa-miR-647 | -0.18 | N/A | Sites in UTR |
| WDFY2    | NM_052950    | WD repeat and FYVE domain containing 2                                                    | 0 | 0 | 0 | 0 | 1 | 0 | 1 | 0 | hsa-miR-647 | -0.18 | N/A | Sites in UTR |
| C9orf100 | NM_032818    | chromosome 9 open reading frame 100                                                       | 0 | 0 | 0 | 0 | 2 | 0 | 0 | 2 | hsa-miR-647 | -0.18 | N/A | Sites in UTR |
| SMG1     | NM_015092    | smg-1 homolog, phosphatidylinositol 3-kinase-related kinase (C. elegans)                  | 0 | 0 | 0 | 0 | 2 | 0 | 0 | 2 | hsa-miR-647 | -0.18 | N/A | Sites in UTR |
| TFCP2L1  | NM_014553    | transcription factor CP2-like 1                                                           | 0 | 0 | 0 | 0 | 2 | 0 | 2 | 0 | hsa-miR-647 | -0.18 | N/A | Sites in UTR |

|         |              |                                                          |   |   |   |   |   |   |   |   |             |       |     |              |
|---------|--------------|----------------------------------------------------------|---|---|---|---|---|---|---|---|-------------|-------|-----|--------------|
| CCDC50  | NM_174908    | coiled-coil domain containing 50                         | 0 | 0 | 0 | 0 | 2 | 1 | 0 | 1 | hsa-miR-647 | -0.18 | N/A | Sites in UTR |
| CXorf36 | NM_176819    | chromosome X open reading frame 36                       | 0 | 0 | 0 | 0 | 3 | 0 | 2 | 1 | hsa-miR-647 | -0.18 | N/A | Sites in UTR |
| GPD2    | NM_000408    | glycerol-3-phosphate dehydrogenase 2 (mitochondrial)     | 0 | 0 | 0 | 0 | 1 | 0 | 0 | 1 | hsa-miR-647 | -0.18 | N/A | Sites in UTR |
| ADPGK   | NM_031284    | ADP-dependent glucokinase                                | 1 | 0 | 0 | 1 | 0 | 0 | 0 | 0 | hsa-miR-647 | -0.18 | N/A | Sites in UTR |
| DBT     | NM_001918    | dihydroipoamide branched chain transacylase E2           | 0 | 0 | 0 | 0 | 1 | 0 | 1 | 0 | hsa-miR-647 | -0.18 | N/A | Sites in UTR |
| WDFY3   | NM_014991    | WD repeat and FYVE domain containing 3                   | 0 | 0 | 0 | 0 | 1 | 0 | 1 | 0 | hsa-miR-647 | -0.18 | N/A | Sites in UTR |
| BTLA    | NM_001085357 | B and T lymphocyte associated                            | 0 | 0 | 0 | 0 | 1 | 0 | 1 | 0 | hsa-miR-647 | -0.18 | N/A | Sites in UTR |
| DAGLA   | NM_006133    | diacylglycerol lipase, alpha                             | 1 | 0 | 1 | 0 | 1 | 0 | 1 | 0 | hsa-miR-647 | -0.18 | N/A | Sites in UTR |
| APLN    | NM_017413    | apelin                                                   | 0 | 0 | 0 | 0 | 1 | 1 | 0 | 0 | hsa-miR-647 | -0.18 | N/A | Sites in UTR |
| TRAM2   | NM_012288    | translocation associated membrane protein 2              | 0 | 0 | 0 | 0 | 2 | 1 | 1 | 0 | hsa-miR-647 | -0.18 | N/A | Sites in UTR |
| FUT8    | NM_004480    | fucosyltransferase 8 (alpha (1,6) fucosyltransferase)    | 0 | 0 | 0 | 0 | 1 | 0 | 0 | 1 | hsa-miR-647 | -0.18 | N/A | Sites in UTR |
| GLI2    | NM_005270    | GLI family zinc finger 2                                 | 0 | 0 | 0 | 0 | 1 | 0 | 0 | 1 | hsa-miR-647 | -0.18 | N/A | Sites in UTR |
| CLEC3A  | NM_005752    | C-type lectin domain family 3, member A                  | 0 | 0 | 0 | 0 | 1 | 0 | 0 | 1 | hsa-miR-647 | -0.18 | N/A | Sites in UTR |
| PRKX    | NM_005044    | protein kinase, X-linked                                 | 0 | 0 | 0 | 0 | 1 | 0 | 1 | 0 | hsa-miR-647 | -0.18 | N/A | Sites in UTR |
| WDHD1   | NM_001008396 | WD repeat and HMG-box DNA binding protein 1              | 0 | 0 | 0 | 0 | 1 | 0 | 1 | 0 | hsa-miR-647 | -0.18 | N/A | Sites in UTR |
| HBP1    | NM_012257    | HMG-box transcription factor 1                           | 0 | 0 | 0 | 0 | 1 | 0 | 1 | 0 | hsa-miR-647 | -0.18 | N/A | Sites in UTR |
| CAMKV   | NM_024046    | CaM kinase-like vesicle-associated                       | 0 | 0 | 0 | 0 | 1 | 0 | 1 | 0 | hsa-miR-647 | -0.18 | N/A | Sites in UTR |
| PIGO    | NM_001201484 | phosphatidylinositol glycan anchor biosynthesis, class O | 1 | 0 | 1 | 0 | 0 | 0 | 0 | 0 | hsa-miR-647 | -0.18 | N/A | Sites in UTR |

|          |              |                                                      |   |   |   |   |   |   |   |   |             |       |     |              |
|----------|--------------|------------------------------------------------------|---|---|---|---|---|---|---|---|-------------|-------|-----|--------------|
| TMEM217  | NM_001162900 | transmembrane protein 217                            | 0 | 0 | 0 | 0 | 1 | 0 | 1 | 0 | hsa-miR-647 | -0.18 | N/A | Sites in UTR |
| KIAA1310 | NM_001115016 | KIAA1310                                             | 1 | 0 | 1 | 0 | 1 | 0 | 1 | 0 | hsa-miR-647 | -0.18 | N/A | Sites in UTR |
| NEFH     | NM_021076    | neurofilament, heavy polypeptide                     | 0 | 0 | 0 | 0 | 1 | 0 | 0 | 1 | hsa-miR-647 | -0.18 | N/A | Sites in UTR |
| PGRMC2   | NM_006320    | progesterone receptor membrane component 2           | 0 | 0 | 0 | 0 | 1 | 0 | 0 | 1 | hsa-miR-647 | -0.18 | N/A | Sites in UTR |
| AMD1     | NM_001033059 | adenosylmethionine decarboxylase 1                   | 0 | 0 | 0 | 0 | 1 | 0 | 1 | 0 | hsa-miR-647 | -0.18 | N/A | Sites in UTR |
| FGF11    | NM_004112    | fibroblast growth factor 11                          | 0 | 0 | 0 | 0 | 1 | 0 | 1 | 0 | hsa-miR-647 | -0.18 | N/A | Sites in UTR |
| IL4R     | NM_000418    | interleukin 4 receptor                               | 0 | 0 | 0 | 0 | 1 | 0 | 1 | 0 | hsa-miR-647 | -0.18 | N/A | Sites in UTR |
| KIAA0415 | NM_014855    | KIAA0415                                             | 0 | 0 | 0 | 0 | 1 | 0 | 1 | 0 | hsa-miR-647 | -0.18 | N/A | Sites in UTR |
| TRAK1    | NM_001042646 | trafficking protein, kinesin binding 1               | 0 | 0 | 0 | 0 | 1 | 0 | 1 | 0 | hsa-miR-647 | -0.18 | N/A | Sites in UTR |
| SH3BGR2  | NM_031469    | SH3 domain binding glutamic acid-rich protein like 2 | 0 | 0 | 0 | 0 | 1 | 0 | 1 | 0 | hsa-miR-647 | -0.18 | N/A | Sites in UTR |
| KIRREL3  | NM_001161707 | kin of IRRE like 3 (Drosophila)                      | 0 | 0 | 0 | 0 | 1 | 0 | 1 | 0 | hsa-miR-647 | -0.18 | N/A | Sites in UTR |
| PAPLN    | NM_173462    | papilin, proteoglycan-like sulfated glycoprotein     | 0 | 0 | 0 | 0 | 1 | 0 | 1 | 0 | hsa-miR-647 | -0.18 | N/A | Sites in UTR |
| DSTYK    | NM_015375    | dual serine/threonine and tyrosine protein kinase    | 0 | 0 | 0 | 0 | 2 | 0 | 1 | 1 | hsa-miR-647 | -0.18 | N/A | Sites in UTR |
| SIRPA    | NM_001040022 | signal-regulatory protein alpha                      | 0 | 0 | 0 | 0 | 2 | 0 | 1 | 1 | hsa-miR-647 | -0.18 | N/A | Sites in UTR |
| LONRF2   | NM_198461    | LON peptidase N-terminal domain and ring finger 2    | 0 | 0 | 0 | 0 | 4 | 3 | 0 | 1 | hsa-miR-647 | -0.18 | N/A | Sites in UTR |
| YRDC     | NM_024640    | yrdC domain containing (E. coli)                     | 0 | 0 | 0 | 0 | 1 | 0 | 0 | 1 | hsa-miR-647 | -0.18 | N/A | Sites in UTR |
| CCDC82   | NM_024725    | coiled-coil domain containing 82                     | 0 | 0 | 0 | 0 | 1 | 0 | 0 | 1 | hsa-miR-647 | -0.18 | N/A | Sites in UTR |
| MEP1A    | NM_005588    | meprin A, alpha (PABA peptide hydrolase)             | 0 | 0 | 0 | 0 | 1 | 0 | 1 | 0 | hsa-miR-647 | -0.18 | N/A | Sites in UTR |

|         |              |                                                                                  |   |   |   |   |   |   |   |   |             |       |     |              |
|---------|--------------|----------------------------------------------------------------------------------|---|---|---|---|---|---|---|---|-------------|-------|-----|--------------|
| MRPS12  | NM_021107    | mitochondrial ribosomal protein S12                                              | 0 | 0 | 0 | 0 | 1 | 0 | 1 | 0 | hsa-miR-647 | -0.18 | N/A | Sites in UTR |
| SNAPC4  | NM_003086    | small nuclear RNA activating complex, polypeptide 4, 190kDa                      | 0 | 0 | 0 | 0 | 1 | 0 | 1 | 0 | hsa-miR-647 | -0.18 | N/A | Sites in UTR |
| CLDN22  | NM_001111319 | claudin 22                                                                       | 0 | 0 | 0 | 0 | 1 | 0 | 1 | 0 | hsa-miR-647 | -0.18 | N/A | Sites in UTR |
| TMEM40  | NM_018306    | transmembrane protein 40                                                         | 0 | 0 | 0 | 0 | 1 | 0 | 1 | 0 | hsa-miR-647 | -0.18 | N/A | Sites in UTR |
| PARP9   | NM_001146106 | poly (ADP-ribose) polymerase family, member 9                                    | 0 | 0 | 0 | 0 | 1 | 0 | 1 | 0 | hsa-miR-647 | -0.18 | N/A | Sites in UTR |
| ACCS    | NM_001127219 | 1-aminocyclopropane-1-carboxylate synthase homolog (Arabidopsis)(non-functional) | 0 | 0 | 0 | 0 | 1 | 0 | 1 | 0 | hsa-miR-647 | -0.18 | N/A | Sites in UTR |
| PGAM5   | NM_138575    | phosphoglycerate mutase family member 5                                          | 0 | 0 | 0 | 0 | 1 | 0 | 1 | 0 | hsa-miR-647 | -0.18 | N/A | Sites in UTR |
| KIF1C   | NM_006612    | kinesin family member 1C                                                         | 1 | 1 | 0 | 0 | 2 | 0 | 1 | 1 | hsa-miR-647 | -0.18 | N/A | Sites in UTR |
| OBFC1   | NM_024928    | oligonucleotide/oligosaccharide-binding fold containing 1                        | 0 | 0 | 0 | 0 | 4 | 1 | 1 | 2 | hsa-miR-647 | -0.18 | N/A | Sites in UTR |
| RASSF8  | NM_007211    | Ras association (RalGDS/AF-6) domain family (N-terminal) member 8                | 0 | 0 | 0 | 0 | 1 | 0 | 0 | 1 | hsa-miR-647 | -0.18 | N/A | Sites in UTR |
| SUMO4   | NM_001002255 | SMT3 suppressor of mif two 3 homolog 4 (S. cerevisiae)                           | 0 | 0 | 0 | 0 | 1 | 0 | 0 | 1 | hsa-miR-647 | -0.18 | N/A | Sites in UTR |
| SLC4A8  | NM_001039960 | solute carrier family 4, sodium bicarbonate cotransporter, member 8              | 0 | 0 | 0 | 0 | 1 | 0 | 1 | 0 | hsa-miR-647 | -0.18 | N/A | Sites in UTR |
| SIPA1L3 | NM_015073    | signal-induced proliferation-associated 1 like 3                                 | 0 | 0 | 0 | 0 | 1 | 0 | 1 | 0 | hsa-miR-647 | -0.18 | N/A | Sites in UTR |
| SMPDL3B | NM_014474    | sphingomyelin phosphodiesterase, acid-like 3B                                    | 0 | 0 | 0 | 0 | 1 | 0 | 1 | 0 | hsa-miR-647 | -0.18 | N/A | Sites in UTR |
| ZRANB1  | NM_017580    | zinc finger, RAN-binding domain containing 1                                     | 0 | 0 | 0 | 0 | 1 | 0 | 1 | 0 | hsa-miR-647 | -0.18 | N/A | Sites in UTR |
| RIC8B   | NM_018157    | resistance to inhibitors of cholinesterase 8 homolog B (C. elegans)              | 0 | 0 | 0 | 0 | 1 | 0 | 1 | 0 | hsa-miR-647 | -0.18 | N/A | Sites in UTR |
| MCCC2   | NM_022132    | methylcrotonoyl-CoA carboxylase 2 (beta)                                         | 0 | 0 | 0 | 0 | 1 | 0 | 1 | 0 | hsa-miR-647 | -0.18 | N/A | Sites in UTR |
| LRFN4   | NM_024036    | leucine rich repeat and fibronectin type III domain containing 4                 | 1 | 0 | 1 | 0 | 0 | 0 | 0 | 0 | hsa-miR-647 | -0.18 | N/A | Sites in UTR |

|         |              |                                                        |   |   |   |   |   |   |   |   |             |       |     |              |
|---------|--------------|--------------------------------------------------------|---|---|---|---|---|---|---|---|-------------|-------|-----|--------------|
| FAM58A  | NM_001130997 | family with sequence similarity 58, member A           | 0 | 0 | 0 | 0 | 1 | 0 | 1 | 0 | hsa-miR-647 | -0.18 | N/A | Sites in UTR |
| CNTNAP5 | NM_130773    | contactin associated protein-like 5                    | 0 | 0 | 0 | 0 | 1 | 0 | 1 | 0 | hsa-miR-647 | -0.18 | N/A | Sites in UTR |
| CSAG1   | NM_001102576 | chondrosarcoma associated gene 1                       | 0 | 0 | 0 | 0 | 1 | 0 | 1 | 0 | hsa-miR-647 | -0.18 | N/A | Sites in UTR |
| ZADH2   | NM_175907    | zinc binding alcohol dehydrogenase domain containing 2 | 0 | 0 | 0 | 0 | 1 | 0 | 1 | 0 | hsa-miR-647 | -0.18 | N/A | Sites in UTR |
| GOLGA1  | NM_002077    | golgin A1                                              | 0 | 0 | 0 | 0 | 2 | 0 | 0 | 2 | hsa-miR-647 | -0.18 | N/A | Sites in UTR |
| ZNF132  | NM_003433    | zinc finger protein 132                                | 0 | 0 | 0 | 0 | 1 | 0 | 0 | 1 | hsa-miR-647 | -0.18 | N/A | Sites in UTR |
| SIGLEC5 | NM_003830    | sialic acid binding Ig-like lectin 5                   | 0 | 0 | 0 | 0 | 1 | 0 | 0 | 1 | hsa-miR-647 | -0.18 | N/A | Sites in UTR |
| PDLIM1  | NM_020992    | PDZ and LIM domain 1                                   | 0 | 0 | 0 | 0 | 1 | 0 | 0 | 1 | hsa-miR-647 | -0.18 | N/A | Sites in UTR |
| AKAP10  | NM_007202    | A kinase (PRKA) anchor protein 10                      | 0 | 0 | 0 | 0 | 1 | 0 | 0 | 1 | hsa-miR-647 | -0.18 | N/A | Sites in UTR |
| RHOT1   | NM_001033566 | ras homolog gene family, member T1                     | 0 | 0 | 0 | 0 | 1 | 0 | 0 | 1 | hsa-miR-647 | -0.18 | N/A | Sites in UTR |
| FAM81B  | NM_152548    | family with sequence similarity 81, member B           | 0 | 0 | 0 | 0 | 1 | 0 | 0 | 1 | hsa-miR-647 | -0.18 | N/A | Sites in UTR |
| BAD     | NM_004322    | BCL2-associated agonist of cell death                  | 0 | 0 | 0 | 0 | 1 | 0 | 1 | 0 | hsa-miR-647 | -0.18 | N/A | Sites in UTR |
| INHBB   | NM_002193    | inhibin, beta B                                        | 0 | 0 | 0 | 0 | 1 | 0 | 1 | 0 | hsa-miR-647 | -0.18 | N/A | Sites in UTR |
| PPM1A   | NM_021003    | protein phosphatase, Mg2+/Mn2+ dependent, 1A           | 1 | 0 | 1 | 0 | 0 | 0 | 0 | 0 | hsa-miR-647 | -0.18 | N/A | Sites in UTR |
| MAPK11  | NM_002751    | mitogen-activated protein kinase 11                    | 0 | 0 | 0 | 0 | 1 | 0 | 1 | 0 | hsa-miR-647 | -0.18 | N/A | Sites in UTR |
| RGS11   | NM_003834    | regulator of G-protein signaling 11                    | 0 | 0 | 0 | 0 | 1 | 0 | 1 | 0 | hsa-miR-647 | -0.18 | N/A | Sites in UTR |
| BVES    | NM_001199563 | blood vessel epicardial substance                      | 0 | 0 | 0 | 0 | 1 | 0 | 1 | 0 | hsa-miR-647 | -0.18 | N/A | Sites in UTR |
| NFAM1   | NM_145912    | NFAT activating protein with ITAM motif 1              | 0 | 0 | 0 | 0 | 4 | 0 | 2 | 2 | hsa-miR-647 | -0.18 | N/A | Sites in UTR |



|           |              |                                                                                |   |   |   |   |   |   |   |   |             |       |     |              |
|-----------|--------------|--------------------------------------------------------------------------------|---|---|---|---|---|---|---|---|-------------|-------|-----|--------------|
| CCDC144A  | NM_014695    | coiled-coil domain containing 144A                                             | 0 | 0 | 0 | 0 | 1 | 0 | 0 | 1 | hsa-miR-647 | -0.17 | N/A | Sites in UTR |
| WWP1      | NM_007013    | WW domain containing E3 ubiquitin protein ligase 1                             | 0 | 0 | 0 | 0 | 1 | 0 | 0 | 1 | hsa-miR-647 | -0.17 | N/A | Sites in UTR |
| MOXD1     | NM_015529    | monooxygenase, DBH-like 1                                                      | 0 | 0 | 0 | 0 | 1 | 0 | 0 | 1 | hsa-miR-647 | -0.17 | N/A | Sites in UTR |
| UNC93A    | NM_001143947 | unc-93 homolog A (C. elegans)                                                  | 0 | 0 | 0 | 0 | 1 | 0 | 0 | 1 | hsa-miR-647 | -0.17 | N/A | Sites in UTR |
| ERVFRD-1  | NM_207582    | endogenous retrovirus group FRD, member 1                                      | 0 | 0 | 0 | 0 | 1 | 0 | 0 | 1 | hsa-miR-647 | -0.17 | N/A | Sites in UTR |
| P2RX4     | NM_002560    | purinergic receptor P2X, ligand-gated ion channel, 4                           | 0 | 0 | 0 | 0 | 1 | 0 | 1 | 0 | hsa-miR-647 | -0.17 | N/A | Sites in UTR |
| ZNF397    | NM_001135178 | zinc finger protein 397                                                        | 0 | 0 | 0 | 0 | 1 | 0 | 1 | 0 | hsa-miR-647 | -0.17 | N/A | Sites in UTR |
| SCARF2    | NM_153334    | scavenger receptor class F, member 2                                           | 0 | 0 | 0 | 0 | 1 | 0 | 1 | 0 | hsa-miR-647 | -0.17 | N/A | Sites in UTR |
| APPBP2    | NM_006380    | amyloid beta precursor protein (cytoplasmic tail) binding protein 2            | 0 | 0 | 0 | 0 | 2 | 0 | 2 | 0 | hsa-miR-647 | -0.17 | N/A | Sites in UTR |
| PLEKHG4B  | NM_052909    | pleckstrin homology domain containing, family G (with RhoGef domain) member 4B | 0 | 0 | 0 | 0 | 2 | 1 | 1 | 0 | hsa-miR-647 | -0.17 | N/A | Sites in UTR |
| EGLN2     | NM_053046    | egl nine homolog 2 (C. elegans)                                                | 1 | 0 | 0 | 1 | 0 | 0 | 0 | 0 | hsa-miR-647 | -0.17 | N/A | Sites in UTR |
| TMPRSS11A | NM_001114387 | transmembrane protease, serine 11A                                             | 0 | 0 | 0 | 0 | 1 | 0 | 0 | 1 | hsa-miR-647 | -0.17 | N/A | Sites in UTR |
| POLR2D    | NM_004805    | polymerase (RNA) II (DNA directed) polypeptide D                               | 0 | 0 | 0 | 0 | 1 | 0 | 1 | 0 | hsa-miR-647 | -0.17 | N/A | Sites in UTR |
| EXO1      | NM_001145464 | endo/exonuclease (5'-3'), endonuclease G-like                                  | 0 | 0 | 0 | 0 | 1 | 0 | 1 | 0 | hsa-miR-647 | -0.17 | N/A | Sites in UTR |
| ANKRD12   | NM_001083625 | ankyrin repeat domain 12                                                       | 0 | 0 | 0 | 0 | 1 | 0 | 1 | 0 | hsa-miR-647 | -0.17 | N/A | Sites in UTR |
| KCNH4     | NM_012285    | potassium voltage-gated channel, subfamily H (eag-related), member 4           | 1 | 0 | 1 | 0 | 0 | 0 | 0 | 0 | hsa-miR-647 | -0.17 | N/A | Sites in UTR |
| SPDEF     | NM_012391    | SAM pointed domain containing ets transcription factor                         | 0 | 0 | 0 | 0 | 1 | 0 | 1 | 0 | hsa-miR-647 | -0.17 | N/A | Sites in UTR |
| NAT9      | NM_015654    | N-acetyltransferase 9 (GCN5-related, putative)                                 | 0 | 0 | 0 | 0 | 1 | 0 | 1 | 0 | hsa-miR-647 | -0.17 | N/A | Sites in UTR |

|          |              |                                                        |   |   |   |   |   |   |   |   |             |       |     |              |
|----------|--------------|--------------------------------------------------------|---|---|---|---|---|---|---|---|-------------|-------|-----|--------------|
| FNIP2    | NM_020840    | folliculin interacting protein 2                       | 0 | 0 | 0 | 0 | 1 | 0 | 1 | 0 | hsa-miR-647 | -0.17 | N/A | Sites in UTR |
| SAMD11   | NM_152486    | sterile alpha motif domain containing 11               | 0 | 0 | 0 | 0 | 1 | 0 | 1 | 0 | hsa-miR-647 | -0.17 | N/A | Sites in UTR |
| KCTD20   | NM_173562    | potassium channel tetramerisation domain containing 20 | 0 | 0 | 0 | 0 | 1 | 0 | 1 | 0 | hsa-miR-647 | -0.17 | N/A | Sites in UTR |
| C11orf91 | NM_001166692 | chromosome 11 open reading frame 91                    | 0 | 0 | 0 | 0 | 1 | 0 | 1 | 0 | hsa-miR-647 | -0.17 | N/A | Sites in UTR |
| LCOR     | NM_001170765 | ligand dependent nuclear receptor corepressor          | 1 | 0 | 0 | 1 | 1 | 0 | 1 | 0 | hsa-miR-647 | -0.17 | N/A | Sites in UTR |
| ZBTB42   | NM_001137601 | zinc finger and BTB domain containing 42               | 0 | 0 | 0 | 0 | 2 | 0 | 0 | 2 | hsa-miR-647 | -0.17 | N/A | Sites in UTR |
| AP1G1    | NM_001030007 | adaptor-related protein complex 1, gamma 1 subunit     | 0 | 0 | 0 | 0 | 1 | 1 | 0 | 0 | hsa-miR-647 | -0.17 | N/A | Sites in UTR |
| FOXJ3    | NM_001198850 | forkhead box J3                                        | 0 | 0 | 0 | 0 | 1 | 1 | 0 | 0 | hsa-miR-647 | -0.17 | N/A | Sites in UTR |
| 6-Mar    | NM_005885    | membrane-associated ring finger (C3HC4) 6              | 0 | 0 | 0 | 0 | 1 | 0 | 0 | 1 | hsa-miR-647 | -0.17 | N/A | Sites in UTR |
| MYL12A   | NM_006471    | myosin, light chain 12A, regulatory, non-sarcomeric    | 0 | 0 | 0 | 0 | 1 | 0 | 0 | 1 | hsa-miR-647 | -0.17 | N/A | Sites in UTR |
| CPLX1    | NM_006651    | complexin 1                                            | 1 | 0 | 0 | 1 | 0 | 0 | 0 | 0 | hsa-miR-647 | -0.17 | N/A | Sites in UTR |
| YTHDF2   | NM_001172828 | YTH domain family, member 2                            | 0 | 0 | 0 | 0 | 1 | 0 | 0 | 1 | hsa-miR-647 | -0.17 | N/A | Sites in UTR |
| IL17RB   | NM_018725    | interleukin 17 receptor B                              | 0 | 0 | 0 | 0 | 1 | 0 | 0 | 1 | hsa-miR-647 | -0.17 | N/A | Sites in UTR |
| TMEM9B   | NM_020644    | TMEM9 domain family, member B                          | 0 | 0 | 0 | 0 | 1 | 0 | 0 | 1 | hsa-miR-647 | -0.17 | N/A | Sites in UTR |
| FAM160B1 | NM_001135051 | family with sequence similarity 160, member B1         | 0 | 0 | 0 | 0 | 1 | 0 | 0 | 1 | hsa-miR-647 | -0.17 | N/A | Sites in UTR |
| VSTM2L   | NM_080607    | V-set and transmembrane domain containing 2 like       | 1 | 0 | 0 | 1 | 0 | 0 | 0 | 0 | hsa-miR-647 | -0.17 | N/A | Sites in UTR |
| BTN2A2   | NM_001197237 | butyrophilin, subfamily 2, member A2                   | 0 | 0 | 0 | 0 | 1 | 0 | 1 | 0 | hsa-miR-647 | -0.17 | N/A | Sites in UTR |
| CRB3     | NM_139161    | crumbs homolog 3 (Drosophila)                          | 0 | 0 | 0 | 0 | 1 | 0 | 1 | 0 | hsa-miR-647 | -0.17 | N/A | Sites in UTR |

|               |              |                                                                                        |   |   |   |   |   |   |   |   |             |       |     |              |
|---------------|--------------|----------------------------------------------------------------------------------------|---|---|---|---|---|---|---|---|-------------|-------|-----|--------------|
| NAIF1         | NM_197956    | nuclear apoptosis inducing factor 1                                                    | 0 | 0 | 0 | 0 | 1 | 0 | 1 | 0 | hsa-miR-647 | -0.17 | N/A | Sites in UTR |
| LCP2          | NM_005565    | lymphocyte cytosolic protein 2 (SH2 domain containing leukocyte protein of 76kDa)      | 0 | 0 | 0 | 0 | 1 | 0 | 0 | 1 | hsa-miR-647 | -0.17 | N/A | Sites in UTR |
| C11orf61      | NM_024631    | chromosome 11 open reading frame 61                                                    | 0 | 0 | 0 | 0 | 1 | 0 | 0 | 1 | hsa-miR-647 | -0.17 | N/A | Sites in UTR |
| PDGFRA        | NM_006206    | platelet-derived growth factor receptor, alpha polypeptide                             | 0 | 0 | 0 | 0 | 2 | 0 | 1 | 1 | hsa-miR-647 | -0.17 | N/A | Sites in UTR |
| CXCR1         | NM_000634    | chemokine (C-X-C motif) receptor 1                                                     | 0 | 0 | 0 | 0 | 1 | 0 | 1 | 0 | hsa-miR-647 | -0.17 | N/A | Sites in UTR |
| TSC1          | NM_000368    | tuberous sclerosis 1                                                                   | 1 | 0 | 1 | 0 | 0 | 0 | 0 | 0 | hsa-miR-647 | -0.17 | N/A | Sites in UTR |
| B4GALT7       | NM_007255    | xylosylprotein beta 1,4-galactosyltransferase, polypeptide 7 (galactosyltransferase I) | 0 | 0 | 0 | 0 | 1 | 0 | 1 | 0 | hsa-miR-647 | -0.17 | N/A | Sites in UTR |
| CLEC16A       | NM_015226    | C-type lectin domain family 16, member A                                               | 0 | 0 | 0 | 0 | 1 | 0 | 1 | 0 | hsa-miR-647 | -0.17 | N/A | Sites in UTR |
| NUPR1         | NM_001042483 | nuclear protein, transcriptional regulator, 1                                          | 0 | 0 | 0 | 0 | 1 | 0 | 1 | 0 | hsa-miR-647 | -0.17 | N/A | Sites in UTR |
| PLEKHH2       | NM_172069    | pleckstrin homology domain containing, family H (with MyTH4 domain) member 2           | 0 | 0 | 0 | 0 | 1 | 0 | 1 | 0 | hsa-miR-647 | -0.17 | N/A | Sites in UTR |
| LSM11         | NM_173491    | LSM11, U7 small nuclear RNA associated                                                 | 0 | 0 | 0 | 0 | 1 | 0 | 1 | 0 | hsa-miR-647 | -0.17 | N/A | Sites in UTR |
| MGAT5B        | NM_001199172 | mannosyl (alpha-1,6-)-glycoprotein beta-1,6-N-acetylglucosaminyltransferase, isozyme B | 0 | 0 | 0 | 0 | 1 | 0 | 1 | 0 | hsa-miR-647 | -0.17 | N/A | Sites in UTR |
| FAM18B2-CDRT4 | NM_001204478 | FAM18B2-CDRT4 readthrough                                                              | 1 | 0 | 1 | 0 | 0 | 0 | 0 | 0 | hsa-miR-647 | -0.17 | N/A | Sites in UTR |
| B3GAT1        | NM_018644    | beta-1,3-glucuronyltransferase 1 (glucuronosyltransferase P)                           | 0 | 0 | 0 | 0 | 2 | 0 | 0 | 2 | hsa-miR-647 | -0.17 | N/A | Sites in UTR |
| HDX           | NM_001177478 | highly divergent homeobox                                                              | 1 | 0 | 0 | 1 | 2 | 0 | 0 | 2 | hsa-miR-647 | -0.17 | N/A | Sites in UTR |
| SIKE1         | NM_001102396 | suppressor of IKBKE 1                                                                  | 0 | 0 | 0 | 0 | 2 | 0 | 1 | 1 | hsa-miR-647 | -0.17 | N/A | Sites in UTR |
| PVRL1         | NM_002855    | poliovirus receptor-related 1 (herpesvirus entry mediator C)                           | 0 | 0 | 0 | 0 | 3 | 0 | 1 | 2 | hsa-miR-647 | -0.17 | N/A | Sites in UTR |
| CAPN2         | NM_001146068 | calpain 2, (m/II) large subunit                                                        | 0 | 0 | 0 | 0 | 1 | 0 | 0 | 1 | hsa-miR-647 | -0.17 | N/A | Sites in UTR |

|          |              |                                                                       |   |   |   |   |   |   |   |   |             |       |     |              |
|----------|--------------|-----------------------------------------------------------------------|---|---|---|---|---|---|---|---|-------------|-------|-----|--------------|
| VCAN     | NM_001126336 | versican                                                              | 0 | 0 | 0 | 0 | 1 | 0 | 0 | 1 | hsa-miR-647 | -0.17 | N/A | Sites in UTR |
| PRR12    | NM_020719    | proline rich 12                                                       | 1 | 0 | 0 | 1 | 0 | 0 | 0 | 0 | hsa-miR-647 | -0.17 | N/A | Sites in UTR |
| CD151    | NM_001039490 | CD151 molecule (Raph blood group)                                     | 0 | 0 | 0 | 0 | 1 | 0 | 1 | 0 | hsa-miR-647 | -0.17 | N/A | Sites in UTR |
| EDN2     | NM_001956    | endothelin 2                                                          | 0 | 0 | 0 | 0 | 1 | 0 | 1 | 0 | hsa-miR-647 | -0.17 | N/A | Sites in UTR |
| MARK3    | NM_001128918 | MAP/microtubule affinity-regulating kinase 3                          | 0 | 0 | 0 | 0 | 1 | 0 | 1 | 0 | hsa-miR-647 | -0.17 | N/A | Sites in UTR |
| SLC37A1  | NM_018964    | solute carrier family 37 (glycerol-3-phosphate transporter), member 1 | 0 | 0 | 0 | 0 | 1 | 0 | 1 | 0 | hsa-miR-647 | -0.17 | N/A | Sites in UTR |
| ANKRD16  | NM_019046    | ankyrin repeat domain 16                                              | 0 | 0 | 0 | 0 | 1 | 0 | 1 | 0 | hsa-miR-647 | -0.17 | N/A | Sites in UTR |
| ZNF461   | NM_153257    | zinc finger protein 461                                               | 0 | 0 | 0 | 0 | 1 | 0 | 1 | 0 | hsa-miR-647 | -0.17 | N/A | Sites in UTR |
| C22orf40 | NM_207327    | chromosome 22 open reading frame 40                                   | 0 | 0 | 0 | 0 | 1 | 0 | 1 | 0 | hsa-miR-647 | -0.17 | N/A | Sites in UTR |
| CAMSAP1  | NM_015447    | calmodulin regulated spectrin-associated protein 1                    | 0 | 0 | 0 | 0 | 1 | 0 | 1 | 0 | hsa-miR-647 | -0.17 | N/A | Sites in UTR |
| KITLG    | NM_000899    | KIT ligand                                                            | 0 | 0 | 0 | 0 | 1 | 1 | 0 | 0 | hsa-miR-647 | -0.17 | N/A | Sites in UTR |
| ASPH     | NM_001164750 | aspartate beta-hydroxylase                                            | 1 | 0 | 0 | 1 | 0 | 0 | 0 | 0 | hsa-miR-647 | -0.17 | N/A | Sites in UTR |
| UNC5C    | NM_003728    | unc-5 homolog C (C. elegans)                                          | 0 | 0 | 0 | 0 | 1 | 0 | 0 | 1 | hsa-miR-647 | -0.17 | N/A | Sites in UTR |
| ESM1     | NM_001135604 | endothelial cell-specific molecule 1                                  | 0 | 0 | 0 | 0 | 1 | 0 | 0 | 1 | hsa-miR-647 | -0.17 | N/A | Sites in UTR |
| PKD1L1   | NM_138295    | polycystic kidney disease 1 like 1                                    | 0 | 0 | 0 | 0 | 1 | 0 | 0 | 1 | hsa-miR-647 | -0.17 | N/A | Sites in UTR |
| SRGAP3   | NM_001033117 | SLIT-ROBO Rho GTPase activating protein 3                             | 0 | 0 | 0 | 0 | 1 | 0 | 1 | 0 | hsa-miR-647 | -0.17 | N/A | Sites in UTR |
| RGS14    | NM_006480    | regulator of G-protein signaling 14                                   | 0 | 0 | 0 | 0 | 1 | 0 | 1 | 0 | hsa-miR-647 | -0.17 | N/A | Sites in UTR |
| EXOC7    | NM_001013839 | exocyst complex component 7                                           | 0 | 0 | 0 | 0 | 1 | 0 | 1 | 0 | hsa-miR-647 | -0.17 | N/A | Sites in UTR |

|         |              |                                                        |   |   |   |   |   |   |   |   |             |       |     |              |
|---------|--------------|--------------------------------------------------------|---|---|---|---|---|---|---|---|-------------|-------|-----|--------------|
| C3orf52 | NM_001171747 | chromosome 3 open reading frame 52                     | 0 | 0 | 0 | 0 | 1 | 0 | 1 | 0 | hsa-miR-647 | -0.17 | N/A | Sites in UTR |
| CCDC68  | NM_001143829 | coiled-coil domain containing 68                       | 0 | 0 | 0 | 0 | 1 | 0 | 1 | 0 | hsa-miR-647 | -0.17 | N/A | Sites in UTR |
| UCN2    | NM_033199    | urocortin 2                                            | 0 | 0 | 0 | 0 | 1 | 0 | 1 | 0 | hsa-miR-647 | -0.17 | N/A | Sites in UTR |
| TRUB1   | NM_139169    | TruB pseudouridine (psi) synthase homolog 1 (E. coli)  | 0 | 0 | 0 | 0 | 1 | 0 | 1 | 0 | hsa-miR-647 | -0.17 | N/A | Sites in UTR |
| STX6    | NM_005819    | syntaxin 6                                             | 0 | 0 | 0 | 0 | 1 | 1 | 0 | 0 | hsa-miR-647 | -0.17 | N/A | Sites in UTR |
| CFLAR   | NM_001127183 | CASP8 and FADD-like apoptosis regulator                | 0 | 0 | 0 | 0 | 2 | 0 | 1 | 1 | hsa-miR-647 | -0.17 | N/A | Sites in UTR |
| F9      | NM_000133    | coagulation factor IX                                  | 0 | 0 | 0 | 0 | 1 | 0 | 0 | 1 | hsa-miR-647 | -0.17 | N/A | Sites in UTR |
| FLNA    | NM_001110556 | filamin A, alpha                                       | 0 | 0 | 0 | 0 | 1 | 0 | 0 | 1 | hsa-miR-647 | -0.17 | N/A | Sites in UTR |
| UCHL5   | NM_001199261 | ubiquitin carboxyl-terminal hydrolase L5               | 0 | 0 | 0 | 0 | 1 | 0 | 0 | 1 | hsa-miR-647 | -0.17 | N/A | Sites in UTR |
| ANKHD1  | NM_001197030 | ankyrin repeat and KH domain containing 1              | 0 | 0 | 0 | 0 | 1 | 0 | 0 | 1 | hsa-miR-647 | -0.17 | N/A | Sites in UTR |
| PTPRN   | NM_001199763 | protein tyrosine phosphatase, receptor type, N         | 0 | 0 | 0 | 0 | 1 | 0 | 1 | 0 | hsa-miR-647 | -0.17 | N/A | Sites in UTR |
| TAGLN   | NM_001001522 | transgelin                                             | 0 | 0 | 0 | 0 | 1 | 0 | 1 | 0 | hsa-miR-647 | -0.17 | N/A | Sites in UTR |
| CREB5   | NM_001011666 | cAMP responsive element binding protein 5              | 0 | 0 | 0 | 0 | 1 | 0 | 1 | 0 | hsa-miR-647 | -0.17 | N/A | Sites in UTR |
| TSPAN15 | NM_012339    | tetraspanin 15                                         | 0 | 0 | 0 | 0 | 1 | 0 | 1 | 0 | hsa-miR-647 | -0.17 | N/A | Sites in UTR |
| SDHAF2  | NM_017841    | succinate dehydrogenase complex assembly factor 2      | 0 | 0 | 0 | 0 | 1 | 0 | 1 | 0 | hsa-miR-647 | -0.17 | N/A | Sites in UTR |
| FSD1L   | NM_207647    | fibronectin type III and SPRY domain containing 1-like | 0 | 0 | 0 | 0 | 1 | 0 | 1 | 0 | hsa-miR-647 | -0.17 | N/A | Sites in UTR |
| ZDHHC18 | NM_032283    | zinc finger, DHHC-type containing 18                   | 0 | 0 | 0 | 0 | 1 | 0 | 1 | 0 | hsa-miR-647 | -0.17 | N/A | Sites in UTR |
| CMTM4   | NM_181521    | CKLF-like MARVEL transmembrane domain containing 4     | 0 | 0 | 0 | 0 | 4 | 0 | 3 | 1 | hsa-miR-647 | -0.17 | N/A | Sites in UTR |

|          |              |                                                               |   |   |   |   |   |   |   |   |             |       |     |              |
|----------|--------------|---------------------------------------------------------------|---|---|---|---|---|---|---|---|-------------|-------|-----|--------------|
| KCNQ3    | NM_001204824 | potassium voltage-gated channel, KQT-like subfamily, member 3 | 0 | 0 | 0 | 0 | 1 | 0 | 1 | 0 | hsa-miR-647 | -0.17 | N/A | Sites in UTR |
| HHAT     | NM_001122834 | hedgehog acyltransferase                                      | 0 | 0 | 0 | 0 | 1 | 0 | 1 | 0 | hsa-miR-647 | -0.17 | N/A | Sites in UTR |
| FOXP2    | NM_001172766 | forkhead box P2                                               | 1 | 0 | 1 | 0 | 0 | 0 | 0 | 0 | hsa-miR-647 | -0.17 | N/A | Sites in UTR |
| ALS2CL   | NM_001190707 | ALS2 C-terminal like                                          | 0 | 0 | 0 | 0 | 1 | 0 | 1 | 0 | hsa-miR-647 | -0.17 | N/A | Sites in UTR |
| TRDMT1   | NM_004412    | tRNA aspartic acid methyltransferase 1                        | 0 | 0 | 0 | 0 | 2 | 0 | 0 | 2 | hsa-miR-647 | -0.17 | N/A | Sites in UTR |
| C8A      | NM_000562    | complement component 8, alpha polypeptide                     | 0 | 0 | 0 | 0 | 1 | 0 | 0 | 1 | hsa-miR-647 | -0.17 | N/A | Sites in UTR |
| UPK1B    | NM_006952    | uropodin 1B                                                   | 0 | 0 | 0 | 0 | 1 | 0 | 0 | 1 | hsa-miR-647 | -0.17 | N/A | Sites in UTR |
| VEGFC    | NM_005429    | vascular endothelial growth factor C                          | 0 | 0 | 0 | 0 | 1 | 0 | 0 | 1 | hsa-miR-647 | -0.17 | N/A | Sites in UTR |
| ANKRD26  | NM_014915    | ankyrin repeat domain 26                                      | 0 | 0 | 0 | 0 | 1 | 0 | 0 | 1 | hsa-miR-647 | -0.17 | N/A | Sites in UTR |
| COBL     | NM_015198    | cordon-bleu homolog (mouse)                                   | 0 | 0 | 0 | 0 | 1 | 0 | 0 | 1 | hsa-miR-647 | -0.17 | N/A | Sites in UTR |
| ZNF419   | NM_001098491 | zinc finger protein 419                                       | 0 | 0 | 0 | 0 | 1 | 0 | 0 | 1 | hsa-miR-647 | -0.17 | N/A | Sites in UTR |
| RSPH3    | NM_031924    | radial spoke 3 homolog (Chlamydomonas)                        | 0 | 0 | 0 | 0 | 1 | 0 | 0 | 1 | hsa-miR-647 | -0.17 | N/A | Sites in UTR |
| LYSMD4   | NM_152449    | LysM, putative peptidoglycan-binding, domain containing 4     | 0 | 0 | 0 | 0 | 1 | 0 | 0 | 1 | hsa-miR-647 | -0.17 | N/A | Sites in UTR |
| PTPN9    | NM_002833    | protein tyrosine phosphatase, non-receptor type 9             | 0 | 0 | 0 | 0 | 1 | 0 | 1 | 0 | hsa-miR-647 | -0.17 | N/A | Sites in UTR |
| TPX2     | NM_012112    | TPX2, microtubule-associated, homolog (Xenopus laevis)        | 0 | 0 | 0 | 0 | 1 | 0 | 1 | 0 | hsa-miR-647 | -0.17 | N/A | Sites in UTR |
| C10orf28 | NM_014472    | chromosome 10 open reading frame 28                           | 0 | 0 | 0 | 0 | 1 | 0 | 1 | 0 | hsa-miR-647 | -0.17 | N/A | Sites in UTR |
| NUB1     | NM_016118    | negative regulator of ubiquitin-like proteins 1               | 0 | 0 | 0 | 0 | 1 | 0 | 1 | 0 | hsa-miR-647 | -0.17 | N/A | Sites in UTR |
| GAB1     | NM_002039    | GRB2-associated binding protein 1                             | 0 | 0 | 0 | 0 | 1 | 1 | 0 | 0 | hsa-miR-647 | -0.17 | N/A | Sites in UTR |

|          |              |                                                       |   |   |   |   |   |   |   |   |             |       |     |              |
|----------|--------------|-------------------------------------------------------|---|---|---|---|---|---|---|---|-------------|-------|-----|--------------|
| BAK1     | NM_001188    | BCL2-antagonist/killer 1                              | 0 | 0 | 0 | 0 | 1 | 0 | 0 | 1 | hsa-miR-647 | -0.17 | N/A | Sites in UTR |
| ZNF45    | NM_003425    | zinc finger protein 45                                | 0 | 0 | 0 | 0 | 1 | 0 | 0 | 1 | hsa-miR-647 | -0.17 | N/A | Sites in UTR |
| CEP350   | NM_014810    | centrosomal protein 350kDa                            | 1 | 0 | 0 | 1 | 0 | 0 | 0 | 0 | hsa-miR-647 | -0.17 | N/A | Sites in UTR |
| ZNF789   | NM_001013258 | zinc finger protein 789                               | 0 | 0 | 0 | 0 | 1 | 0 | 0 | 1 | hsa-miR-647 | -0.17 | N/A | Sites in UTR |
| AMIGO2   | NM_001143668 | adhesion molecule with Ig-like domain 2               | 0 | 0 | 0 | 0 | 1 | 0 | 0 | 1 | hsa-miR-647 | -0.17 | N/A | Sites in UTR |
| EFNB1    | NM_004429    | ephrin-B1                                             | 0 | 0 | 0 | 0 | 1 | 0 | 1 | 0 | hsa-miR-647 | -0.17 | N/A | Sites in UTR |
| EPOR     | NM_000121    | erythropoietin receptor                               | 0 | 0 | 0 | 0 | 1 | 0 | 1 | 0 | hsa-miR-647 | -0.17 | N/A | Sites in UTR |
| RPS24    | NM_001142285 | ribosomal protein S24                                 | 0 | 0 | 0 | 0 | 1 | 0 | 1 | 0 | hsa-miR-647 | -0.17 | N/A | Sites in UTR |
| S1PR4    | NM_003775    | sphingosine-1-phosphate receptor 4                    | 0 | 0 | 0 | 0 | 1 | 0 | 1 | 0 | hsa-miR-647 | -0.17 | N/A | Sites in UTR |
| C2CD2    | NM_015500    | C2 calcium-dependent domain containing 2              | 0 | 0 | 0 | 0 | 1 | 0 | 1 | 0 | hsa-miR-647 | -0.17 | N/A | Sites in UTR |
| C19orf6  | NM_001033026 | chromosome 19 open reading frame 6                    | 0 | 0 | 0 | 0 | 1 | 0 | 1 | 0 | hsa-miR-647 | -0.17 | N/A | Sites in UTR |
| UROC1    | NM_001165974 | urocanase domain containing 1                         | 0 | 0 | 0 | 0 | 1 | 0 | 1 | 0 | hsa-miR-647 | -0.17 | N/A | Sites in UTR |
| PHF16    | NM_001077445 | PHD finger protein 16                                 | 0 | 0 | 0 | 0 | 1 | 0 | 0 | 1 | hsa-miR-647 | -0.17 | N/A | Sites in UTR |
| CASS4    | NM_001164114 | Cas scaffolding protein family member 4               | 0 | 0 | 0 | 0 | 1 | 0 | 0 | 1 | hsa-miR-647 | -0.17 | N/A | Sites in UTR |
| C22orf39 | NM_001166242 | chromosome 22 open reading frame 39                   | 0 | 0 | 0 | 0 | 1 | 0 | 0 | 1 | hsa-miR-647 | -0.17 | N/A | Sites in UTR |
| CYBB     | NM_000397    | cytochrome b-245, beta polypeptide                    | 0 | 0 | 0 | 0 | 1 | 0 | 1 | 0 | hsa-miR-647 | -0.17 | N/A | Sites in UTR |
| HLA-DQB1 | NM_002123    | major histocompatibility complex, class II, DQ beta 1 | 0 | 0 | 0 | 0 | 1 | 0 | 1 | 0 | hsa-miR-647 | -0.17 | N/A | Sites in UTR |
| RAD23A   | NM_005053    | RAD23 homolog A ( <i>S. cerevisiae</i> )              | 0 | 0 | 0 | 0 | 1 | 0 | 1 | 0 | hsa-miR-647 | -0.17 | N/A | Sites in UTR |

|          |              |                                                            |   |   |   |   |   |   |   |   |             |       |     |              |
|----------|--------------|------------------------------------------------------------|---|---|---|---|---|---|---|---|-------------|-------|-----|--------------|
| SGSH     | NM_000199    | N-sulfoglucosamine sulfohydrolase                          | 0 | 0 | 0 | 0 | 1 | 0 | 1 | 0 | hsa-miR-647 | -0.17 | N/A | Sites in UTR |
| ZNF217   | NM_006526    | zinc finger protein 217                                    | 0 | 0 | 0 | 0 | 1 | 0 | 1 | 0 | hsa-miR-647 | -0.17 | N/A | Sites in UTR |
| TBC1D1   | NM_015173    | TBC1 (tre-2/USP6, BUB2, cdc16) domain family, member 1     | 0 | 0 | 0 | 0 | 1 | 0 | 1 | 0 | hsa-miR-647 | -0.17 | N/A | Sites in UTR |
| TXN2     | NM_012473    | thioredoxin 2                                              | 0 | 0 | 0 | 0 | 1 | 0 | 1 | 0 | hsa-miR-647 | -0.17 | N/A | Sites in UTR |
| JOSD1    | NM_014876    | Josephin domain containing 1                               | 0 | 0 | 0 | 0 | 2 | 0 | 1 | 1 | hsa-miR-647 | -0.17 | N/A | Sites in UTR |
| C10orf26 | NM_001083913 | chromosome 10 open reading frame 26                        | 1 | 0 | 1 | 0 | 2 | 0 | 1 | 1 | hsa-miR-647 | -0.17 | N/A | Sites in UTR |
| ARHGAP35 | NM_004491    | Rho GTPase activating protein 35                           | 0 | 0 | 0 | 0 | 3 | 0 | 1 | 2 | hsa-miR-647 | -0.16 | N/A | Sites in UTR |
| DDAH1    | NM_001134445 | dimethylarginine dimethylaminohydrolase 1                  | 0 | 0 | 0 | 0 | 1 | 0 | 0 | 1 | hsa-miR-647 | -0.16 | N/A | Sites in UTR |
| PIK3R4   | NM_014602    | phosphoinositide-3-kinase, regulatory subunit 4            | 0 | 0 | 0 | 0 | 1 | 0 | 0 | 1 | hsa-miR-647 | -0.16 | N/A | Sites in UTR |
| ADAMTS9  | NM_182920    | ADAM metalloproteinase with thrombospondin type 1 motif, 9 | 0 | 0 | 0 | 0 | 1 | 0 | 0 | 1 | hsa-miR-647 | -0.16 | N/A | Sites in UTR |
| NKAIN2   | NM_001040214 | Na+/K+ transporting ATPase interacting 2                   | 0 | 0 | 0 | 0 | 1 | 0 | 0 | 1 | hsa-miR-647 | -0.16 | N/A | Sites in UTR |
| KRT3     | NM_057088    | keratin 3                                                  | 0 | 0 | 0 | 0 | 1 | 0 | 1 | 0 | hsa-miR-647 | -0.16 | N/A | Sites in UTR |
| TEAD3    | NM_003214    | TEA domain family member 3                                 | 0 | 0 | 0 | 0 | 1 | 0 | 1 | 0 | hsa-miR-647 | -0.16 | N/A | Sites in UTR |
| ABHD12   | NM_001042472 | abhydrolase domain containing 12                           | 0 | 0 | 0 | 0 | 1 | 0 | 1 | 0 | hsa-miR-647 | -0.16 | N/A | Sites in UTR |
| PHPT1    | NM_001135861 | phosphohistidine phosphatase 1                             | 0 | 0 | 0 | 0 | 1 | 0 | 1 | 0 | hsa-miR-647 | -0.16 | N/A | Sites in UTR |
| SEPX1    | NM_016332    | selenoprotein X, 1                                         | 0 | 0 | 0 | 0 | 1 | 0 | 1 | 0 | hsa-miR-647 | -0.16 | N/A | Sites in UTR |
| DHX35    | NM_001190809 | DEAH (Asp-Glu-Ala-His) box polypeptide 35                  | 0 | 0 | 0 | 0 | 1 | 0 | 1 | 0 | hsa-miR-647 | -0.16 | N/A | Sites in UTR |
| ARMC6    | NM_001199196 | armadillo repeat containing 6                              | 0 | 0 | 0 | 0 | 1 | 0 | 1 | 0 | hsa-miR-647 | -0.16 | N/A | Sites in UTR |



|          |              |                                                              |   |   |   |   |   |   |   |   |             |       |     |              |
|----------|--------------|--------------------------------------------------------------|---|---|---|---|---|---|---|---|-------------|-------|-----|--------------|
| FGD5     | NM_152536    | FYVE, RhoGEF and PH domain containing 5                      | 0 | 0 | 0 | 0 | 1 | 0 | 1 | 0 | hsa-miR-647 | -0.16 | N/A | Sites in UTR |
| FZD2     | NM_001466    | frizzled family receptor 2                                   | 0 | 0 | 0 | 0 | 1 | 1 | 0 | 0 | hsa-miR-647 | -0.16 | N/A | Sites in UTR |
| ST8SIA1  | NM_003034    | ST8 alpha-N-acetyl-neuraminide alpha-2,8-sialyltransferase 1 | 0 | 0 | 0 | 0 | 1 | 1 | 0 | 0 | hsa-miR-647 | -0.16 | N/A | Sites in UTR |
| HDAC4    | NM_006037    | histone deacetylase 4                                        | 0 | 0 | 0 | 0 | 2 | 0 | 1 | 1 | hsa-miR-647 | -0.16 | N/A | Sites in UTR |
| ATP2B3   | NM_001001344 | ATPase, Ca++ transporting, plasma membrane 3                 | 0 | 0 | 0 | 0 | 2 | 0 | 2 | 0 | hsa-miR-647 | -0.16 | N/A | Sites in UTR |
| LUM      | NM_002345    | lumican                                                      | 0 | 0 | 0 | 0 | 1 | 0 | 0 | 1 | hsa-miR-647 | -0.16 | N/A | Sites in UTR |
| MEA1     | NM_014623    | male-enhanced antigen 1                                      | 0 | 0 | 0 | 0 | 1 | 0 | 0 | 1 | hsa-miR-647 | -0.16 | N/A | Sites in UTR |
| C10orf46 | NM_153810    | chromosome 10 open reading frame 46                          | 0 | 0 | 0 | 0 | 1 | 0 | 0 | 1 | hsa-miR-647 | -0.16 | N/A | Sites in UTR |
| CCDC39   | NM_181426    | coiled-coil domain containing 39                             | 0 | 0 | 0 | 0 | 1 | 0 | 0 | 1 | hsa-miR-647 | -0.16 | N/A | Sites in UTR |
| ZNF470   | NM_001001668 | zinc finger protein 470                                      | 0 | 0 | 0 | 0 | 1 | 0 | 0 | 1 | hsa-miR-647 | -0.16 | N/A | Sites in UTR |
| KLF5     | NM_001730    | Kruppel-like factor 5 (intestinal)                           | 0 | 0 | 0 | 0 | 1 | 0 | 1 | 0 | hsa-miR-647 | -0.16 | N/A | Sites in UTR |
| CYP1A1   | NM_000499    | cytochrome P450, family 1, subfamily A, polypeptide 1        | 0 | 0 | 0 | 0 | 1 | 0 | 1 | 0 | hsa-miR-647 | -0.16 | N/A | Sites in UTR |
| HLA-E    | NM_005516    | major histocompatibility complex, class I, E                 | 0 | 0 | 0 | 0 | 1 | 0 | 1 | 0 | hsa-miR-647 | -0.16 | N/A | Sites in UTR |
| SPARC    | NM_003118    | secreted protein, acidic, cysteine-rich (osteonectin)        | 0 | 0 | 0 | 0 | 1 | 0 | 1 | 0 | hsa-miR-647 | -0.16 | N/A | Sites in UTR |
| CREB3L3  | NM_032607    | cAMP responsive element binding protein 3-like 3             | 0 | 0 | 0 | 0 | 1 | 0 | 1 | 0 | hsa-miR-647 | -0.16 | N/A | Sites in UTR |
| PABPN1L  | NM_001080487 | poly(A) binding protein, nuclear 1-like (cytoplasmic)        | 0 | 0 | 0 | 0 | 1 | 0 | 1 | 0 | hsa-miR-647 | -0.16 | N/A | Sites in UTR |
| DSC2     | NM_004949    | desmocollin 2                                                | 0 | 0 | 0 | 0 | 1 | 0 | 0 | 1 | hsa-miR-647 | -0.16 | N/A | Sites in UTR |
| SP140    | NM_007237    | SP140 nuclear body protein                                   | 0 | 0 | 0 | 0 | 1 | 0 | 0 | 1 | hsa-miR-647 | -0.16 | N/A | Sites in UTR |

|          |              |                                                       |   |   |   |   |   |   |   |   |             |       |     |              |
|----------|--------------|-------------------------------------------------------|---|---|---|---|---|---|---|---|-------------|-------|-----|--------------|
| MOBKL1B  | NM_018221    | MOB1, Mps One Binder kinase activator-like 1B (yeast) | 0 | 0 | 0 | 0 | 1 | 0 | 0 | 1 | hsa-miR-647 | -0.16 | N/A | Sites in UTR |
| SCUBE2   | NM_001170690 | signal peptide, CUB domain, EGF-like 2                | 0 | 0 | 0 | 0 | 1 | 0 | 0 | 1 | hsa-miR-647 | -0.16 | N/A | Sites in UTR |
| CD5      | NM_014207    | CD5 molecule                                          | 0 | 0 | 0 | 0 | 1 | 0 | 1 | 0 | hsa-miR-647 | -0.16 | N/A | Sites in UTR |
| FBLN1    | NM_006486    | fibulin 1                                             | 0 | 0 | 0 | 0 | 1 | 0 | 1 | 0 | hsa-miR-647 | -0.16 | N/A | Sites in UTR |
| GABRA3   | NM_000808    | gamma-aminobutyric acid (GABA) A receptor, alpha 3    | 0 | 0 | 0 | 0 | 1 | 0 | 1 | 0 | hsa-miR-647 | -0.16 | N/A | Sites in UTR |
| PTPRJ    | NM_002843    | protein tyrosine phosphatase, receptor type, J        | 0 | 0 | 0 | 0 | 1 | 0 | 1 | 0 | hsa-miR-647 | -0.16 | N/A | Sites in UTR |
| TP63     | NM_001114978 | tumor protein p63                                     | 0 | 0 | 0 | 0 | 1 | 0 | 1 | 0 | hsa-miR-647 | -0.16 | N/A | Sites in UTR |
| ARID2    | NM_152641    | AT rich interactive domain 2 (ARID, RFX-like)         | 1 | 0 | 1 | 0 | 0 | 0 | 0 | 0 | hsa-miR-647 | -0.16 | N/A | Sites in UTR |
| MAP3K5   | NM_005923    | mitogen-activated protein kinase kinase kinase 5      | 0 | 0 | 0 | 0 | 1 | 0 | 0 | 1 | hsa-miR-647 | -0.16 | N/A | Sites in UTR |
| SP140L   | NM_138402    | SP140 nuclear body protein-like                       | 0 | 0 | 0 | 0 | 1 | 0 | 0 | 1 | hsa-miR-647 | -0.16 | N/A | Sites in UTR |
| ZNF558   | NM_144693    | zinc finger protein 558                               | 0 | 0 | 0 | 0 | 1 | 0 | 0 | 1 | hsa-miR-647 | -0.16 | N/A | Sites in UTR |
| ANKRD18A | NM_147195    | ankyrin repeat domain 18A                             | 0 | 0 | 0 | 0 | 1 | 0 | 0 | 1 | hsa-miR-647 | -0.16 | N/A | Sites in UTR |
| CSPG4    | NM_001897    | chondroitin sulfate proteoglycan 4                    | 0 | 0 | 0 | 0 | 1 | 0 | 1 | 0 | hsa-miR-647 | -0.16 | N/A | Sites in UTR |
| NFRKB    | NM_001143835 | nuclear factor related to kappaB binding protein      | 0 | 0 | 0 | 0 | 1 | 0 | 1 | 0 | hsa-miR-647 | -0.16 | N/A | Sites in UTR |
| LHX6     | NM_001242333 | LIM homeobox 6                                        | 0 | 0 | 0 | 0 | 1 | 0 | 1 | 0 | hsa-miR-647 | -0.16 | N/A | Sites in UTR |
| HOOK1    | NM_015888    | hook homolog 1 (Drosophila)                           | 0 | 0 | 0 | 0 | 1 | 0 | 1 | 0 | hsa-miR-647 | -0.16 | N/A | Sites in UTR |
| FEZF2    | NM_018008    | FEZ family zinc finger 2                              | 0 | 0 | 0 | 0 | 1 | 0 | 1 | 0 | hsa-miR-647 | -0.16 | N/A | Sites in UTR |
| BCAN     | NM_021948    | brevican                                              | 0 | 0 | 0 | 0 | 1 | 0 | 1 | 0 | hsa-miR-647 | -0.16 | N/A | Sites in UTR |

|         |              |                                                   |   |   |   |   |   |   |   |   |             |       |     |              |
|---------|--------------|---------------------------------------------------|---|---|---|---|---|---|---|---|-------------|-------|-----|--------------|
| HPDL    | NM_032756    | 4-hydroxyphenylpyruvate dioxygenase-like          | 0 | 0 | 0 | 0 | 1 | 0 | 1 | 0 | hsa-miR-647 | -0.16 | N/A | Sites in UTR |
| NKD1    | NM_033119    | naked cuticle homolog 1 (Drosophila)              | 0 | 0 | 0 | 0 | 3 | 0 | 2 | 1 | hsa-miR-647 | -0.16 | N/A | Sites in UTR |
| ZNF192  | NM_006298    | zinc finger protein 192                           | 0 | 0 | 0 | 0 | 1 | 0 | 0 | 1 | hsa-miR-647 | -0.16 | N/A | Sites in UTR |
| IRAK3   | NM_001142523 | interleukin-1 receptor-associated kinase 3        | 0 | 0 | 0 | 0 | 1 | 0 | 0 | 1 | hsa-miR-647 | -0.16 | N/A | Sites in UTR |
| TRIM32  | NM_001099679 | tripartite motif containing 32                    | 0 | 0 | 0 | 0 | 1 | 0 | 0 | 1 | hsa-miR-647 | -0.16 | N/A | Sites in UTR |
| GLCE    | NM_015554    | glucuronic acid epimerase                         | 0 | 0 | 0 | 0 | 1 | 0 | 0 | 1 | hsa-miR-647 | -0.16 | N/A | Sites in UTR |
| SULF2   | NM_001161841 | sulfatase 2                                       | 0 | 0 | 0 | 0 | 1 | 0 | 0 | 1 | hsa-miR-647 | -0.16 | N/A | Sites in UTR |
| EIF2C3  | NM_024852    | eukaryotic translation initiation factor 2C, 3    | 0 | 0 | 0 | 0 | 1 | 0 | 0 | 1 | hsa-miR-647 | -0.16 | N/A | Sites in UTR |
| ZNF618  | NM_133374    | zinc finger protein 618                           | 2 | 0 | 0 | 2 | 0 | 0 | 0 | 0 | hsa-miR-647 | -0.16 | N/A | Sites in UTR |
| ACTB    | NM_001101    | actin, beta                                       | 0 | 0 | 0 | 0 | 1 | 0 | 1 | 0 | hsa-miR-647 | -0.16 | N/A | Sites in UTR |
| PTPN3   | NM_001145368 | protein tyrosine phosphatase, non-receptor type 3 | 0 | 0 | 0 | 0 | 1 | 0 | 1 | 0 | hsa-miR-647 | -0.16 | N/A | Sites in UTR |
| MTL5    | NM_001039656 | metallothionein-like 5, testis-specific (tesmin)  | 0 | 0 | 0 | 0 | 1 | 0 | 1 | 0 | hsa-miR-647 | -0.16 | N/A | Sites in UTR |
| PLCH2   | NM_014638    | phospholipase C, eta 2                            | 0 | 0 | 0 | 0 | 1 | 0 | 1 | 0 | hsa-miR-647 | -0.16 | N/A | Sites in UTR |
| RAB20   | NM_017817    | RAB20, member RAS oncogene family                 | 0 | 0 | 0 | 0 | 1 | 0 | 1 | 0 | hsa-miR-647 | -0.16 | N/A | Sites in UTR |
| LRRC3   | NM_030891    | leucine rich repeat containing 3                  | 0 | 0 | 0 | 0 | 1 | 0 | 1 | 0 | hsa-miR-647 | -0.16 | N/A | Sites in UTR |
| C5orf20 | NM_130848    | chromosome 5 open reading frame 20                | 0 | 0 | 0 | 0 | 1 | 0 | 1 | 0 | hsa-miR-647 | -0.16 | N/A | Sites in UTR |
| KIF21B  | NM_017596    | kinesin family member 21B                         | 0 | 0 | 0 | 0 | 2 | 0 | 1 | 1 | hsa-miR-647 | -0.16 | N/A | Sites in UTR |
| NCOR2   | NM_001077261 | nuclear receptor corepressor 2                    | 0 | 0 | 0 | 0 | 2 | 0 | 1 | 1 | hsa-miR-647 | -0.16 | N/A | Sites in UTR |

|          |              |                                                                             |   |   |   |   |   |   |   |   |             |       |     |              |
|----------|--------------|-----------------------------------------------------------------------------|---|---|---|---|---|---|---|---|-------------|-------|-----|--------------|
| ACTN3    | NM_001104    | actinin, alpha 3                                                            | 0 | 0 | 0 | 0 | 1 | 0 | 0 | 1 | hsa-miR-647 | -0.16 | N/A | Sites in UTR |
| APOC2    | NM_000483    | apolipoprotein C-II                                                         | 0 | 0 | 0 | 0 | 1 | 0 | 0 | 1 | hsa-miR-647 | -0.16 | N/A | Sites in UTR |
| FCGR2C   | NM_201563    | Fc fragment of IgG, low affinity IIc, receptor for (CD32) (gene/pseudogene) | 0 | 0 | 0 | 0 | 1 | 0 | 0 | 1 | hsa-miR-647 | -0.16 | N/A | Sites in UTR |
| KRTAP1-1 | NM_030967    | keratin associated protein 1-1                                              | 0 | 0 | 0 | 0 | 1 | 0 | 0 | 1 | hsa-miR-647 | -0.16 | N/A | Sites in UTR |
| DEFB125  | NM_153325    | defensin, beta 125                                                          | 0 | 0 | 0 | 0 | 1 | 0 | 0 | 1 | hsa-miR-647 | -0.16 | N/A | Sites in UTR |
| H2BFM    | NM_001164416 | H2B histone family, member M                                                | 0 | 0 | 0 | 0 | 1 | 0 | 0 | 1 | hsa-miR-647 | -0.16 | N/A | Sites in UTR |
| KLHL30   | NM_198582    | kelch-like 30 (Drosophila)                                                  | 0 | 0 | 0 | 0 | 1 | 0 | 0 | 1 | hsa-miR-647 | -0.16 | N/A | Sites in UTR |
| DUSP4    | NM_001394    | dual specificity phosphatase 4                                              | 0 | 0 | 0 | 0 | 1 | 0 | 1 | 0 | hsa-miR-647 | -0.16 | N/A | Sites in UTR |
| EMP1     | NM_001423    | epithelial membrane protein 1                                               | 0 | 0 | 0 | 0 | 1 | 0 | 1 | 0 | hsa-miR-647 | -0.16 | N/A | Sites in UTR |
| ITGA9    | NM_002207    | integrin, alpha 9                                                           | 0 | 0 | 0 | 0 | 1 | 0 | 1 | 0 | hsa-miR-647 | -0.16 | N/A | Sites in UTR |
| ARHGEF2  | NM_001162383 | Rho/Rac guanine nucleotide exchange factor (GEF) 2                          | 0 | 0 | 0 | 0 | 1 | 0 | 1 | 0 | hsa-miR-647 | -0.16 | N/A | Sites in UTR |
| CCDC165  | NM_015210    | coiled-coil domain containing 165                                           | 0 | 0 | 0 | 0 | 1 | 0 | 1 | 0 | hsa-miR-647 | -0.16 | N/A | Sites in UTR |
| RGMA     | NM_001166283 | RGM domain family, member A                                                 | 0 | 0 | 0 | 0 | 1 | 0 | 1 | 0 | hsa-miR-647 | -0.16 | N/A | Sites in UTR |
| PCBP4    | NM_001174100 | poly(rC) binding protein 4                                                  | 0 | 0 | 0 | 0 | 1 | 0 | 1 | 0 | hsa-miR-647 | -0.16 | N/A | Sites in UTR |
| PLA2G2F  | NM_022819    | phospholipase A2, group IIF                                                 | 0 | 0 | 0 | 0 | 2 | 0 | 2 | 0 | hsa-miR-647 | -0.16 | N/A | Sites in UTR |
| 3-Mar    | NM_178450    | membrane-associated ring finger (C3HC4) 3                                   | 0 | 0 | 0 | 0 | 2 | 0 | 2 | 0 | hsa-miR-647 | -0.16 | N/A | Sites in UTR |
| TULP4    | NM_001007466 | tubby like protein 4                                                        | 0 | 0 | 0 | 0 | 2 | 0 | 1 | 1 | hsa-miR-647 | -0.16 | N/A | Sites in UTR |
| ARL6IP5  | NM_006407    | ADP-ribosylation-like factor 6 interacting protein 5                        | 0 | 0 | 0 | 0 | 1 | 0 | 0 | 1 | hsa-miR-647 | -0.16 | N/A | Sites in UTR |

|          |              |                                                        |   |   |   |   |   |   |   |   |             |       |     |              |
|----------|--------------|--------------------------------------------------------|---|---|---|---|---|---|---|---|-------------|-------|-----|--------------|
| PBOV1    | NM_021635    | prostate and breast cancer overexpressed 1             | 0 | 0 | 0 | 0 | 1 | 0 | 0 | 1 | hsa-miR-647 | -0.16 | N/A | Sites in UTR |
| ASXL3    | NM_030632    | additional sex combs like 3 (Drosophila)               | 0 | 0 | 0 | 0 | 1 | 0 | 0 | 1 | hsa-miR-647 | -0.16 | N/A | Sites in UTR |
| TADA2B   | NM_152293    | transcriptional adaptor 2B                             | 0 | 0 | 0 | 0 | 1 | 0 | 0 | 1 | hsa-miR-647 | -0.16 | N/A | Sites in UTR |
| CXCL17   | NM_198477    | chemokine (C-X-C motif) ligand 17                      | 0 | 0 | 0 | 0 | 1 | 0 | 0 | 1 | hsa-miR-647 | -0.16 | N/A | Sites in UTR |
| MMP14    | NM_004995    | matrix metalloproteinase 14 (membrane-inserted)        | 0 | 0 | 0 | 0 | 1 | 0 | 1 | 0 | hsa-miR-647 | -0.16 | N/A | Sites in UTR |
| SDPR     | NM_004657    | serum deprivation response                             | 0 | 0 | 0 | 0 | 1 | 0 | 1 | 0 | hsa-miR-647 | -0.16 | N/A | Sites in UTR |
| SDS      | NM_006843    | serine dehydratase                                     | 0 | 0 | 0 | 0 | 1 | 0 | 1 | 0 | hsa-miR-647 | -0.16 | N/A | Sites in UTR |
| SLC48A1  | NM_017842    | solute carrier family 48 (heme transporter), member 1  | 0 | 0 | 0 | 0 | 1 | 0 | 1 | 0 | hsa-miR-647 | -0.16 | N/A | Sites in UTR |
| XPO5     | NM_020750    | exportin 5                                             | 0 | 0 | 0 | 0 | 1 | 0 | 1 | 0 | hsa-miR-647 | -0.16 | N/A | Sites in UTR |
| CDC45    | NM_080668    | cell division cycle associated 5                       | 0 | 0 | 0 | 0 | 1 | 0 | 1 | 0 | hsa-miR-647 | -0.16 | N/A | Sites in UTR |
| SGK494   | NM_001174103 | uncharacterized serine/threonine-protein kinase SgK494 | 1 | 0 | 1 | 0 | 0 | 0 | 0 | 0 | hsa-miR-647 | -0.16 | N/A | Sites in UTR |
| GPR111   | NM_153839    | G protein-coupled receptor 111                         | 0 | 0 | 0 | 0 | 1 | 0 | 1 | 0 | hsa-miR-647 | -0.16 | N/A | Sites in UTR |
| DDX51    | NM_175066    | DEAD (Asp-Glu-Ala-Asp) box polypeptide 51              | 0 | 0 | 0 | 0 | 1 | 0 | 1 | 0 | hsa-miR-647 | -0.16 | N/A | Sites in UTR |
| ARHGAP26 | NM_001135608 | Rho GTPase activating protein 26                       | 1 | 0 | 1 | 0 | 1 | 0 | 0 | 1 | hsa-miR-647 | -0.16 | N/A | Sites in UTR |
| ACACB    | NM_001093    | acetyl-CoA carboxylase beta                            | 0 | 0 | 0 | 0 | 1 | 0 | 0 | 1 | hsa-miR-647 | -0.16 | N/A | Sites in UTR |
| MLX      | NM_170607    | MAX-like protein X                                     | 0 | 0 | 0 | 0 | 1 | 0 | 0 | 1 | hsa-miR-647 | -0.16 | N/A | Sites in UTR |
| PNKD     | NM_001077399 | paroxysmal nonkinesigenic dyskinesia                   | 0 | 0 | 0 | 0 | 1 | 0 | 0 | 1 | hsa-miR-647 | -0.16 | N/A | Sites in UTR |
| APOLD1   | NM_001130415 | apolipoprotein L domain containing 1                   | 0 | 0 | 0 | 0 | 1 | 0 | 0 | 1 | hsa-miR-647 | -0.16 | N/A | Sites in UTR |

|         |              |                                                                                                     |   |   |   |   |   |   |   |   |             |       |     |              |
|---------|--------------|-----------------------------------------------------------------------------------------------------|---|---|---|---|---|---|---|---|-------------|-------|-----|--------------|
| MAP2    | NM_001039538 | microtubule-associated protein 2                                                                    | 0 | 0 | 0 | 0 | 1 | 0 | 0 | 1 | hsa-miR-647 | -0.16 | N/A | Sites in UTR |
| RPL36A  | NM_001199972 | ribosomal protein L36a                                                                              | 0 | 0 | 0 | 0 | 1 | 0 | 0 | 1 | hsa-miR-647 | -0.16 | N/A | Sites in UTR |
| ZNF460  | NM_006635    | zinc finger protein 460                                                                             | 0 | 0 | 0 | 0 | 1 | 0 | 0 | 1 | hsa-miR-647 | -0.16 | N/A | Sites in UTR |
| GCN1L1  | NM_006836    | GCN1 general control of amino-acid synthesis 1-like 1 (yeast)                                       | 0 | 0 | 0 | 0 | 1 | 0 | 0 | 1 | hsa-miR-647 | -0.16 | N/A | Sites in UTR |
| GPATCH8 | NM_001002909 | G patch domain containing 8                                                                         | 1 | 0 | 0 | 1 | 0 | 0 | 0 | 0 | hsa-miR-647 | -0.16 | N/A | Sites in UTR |
| NECAP1  | NM_015509    | NECAP endocytosis associated 1                                                                      | 0 | 0 | 0 | 0 | 1 | 0 | 0 | 1 | hsa-miR-647 | -0.16 | N/A | Sites in UTR |
| JMJD4   | NM_001161465 | jumonji domain containing 4                                                                         | 0 | 0 | 0 | 0 | 1 | 0 | 0 | 1 | hsa-miR-647 | -0.16 | N/A | Sites in UTR |
| ALPK2   | NM_052947    | alpha-kinase 2                                                                                      | 0 | 0 | 0 | 0 | 1 | 0 | 0 | 1 | hsa-miR-647 | -0.16 | N/A | Sites in UTR |
| FAM122C | NM_001170780 | family with sequence similarity 122C                                                                | 0 | 0 | 0 | 0 | 1 | 0 | 0 | 1 | hsa-miR-647 | -0.16 | N/A | Sites in UTR |
| FAM120C | NM_017848    | family with sequence similarity 120C                                                                | 0 | 0 | 0 | 0 | 2 | 0 | 0 | 2 | hsa-miR-647 | -0.16 | N/A | Sites in UTR |
| FOXO4   | NM_001170931 | forkhead box O4                                                                                     | 0 | 0 | 0 | 0 | 1 | 0 | 1 | 0 | hsa-miR-647 | -0.16 | N/A | Sites in UTR |
| ZNF135  | NM_001164529 | zinc finger protein 135                                                                             | 0 | 0 | 0 | 0 | 1 | 0 | 1 | 0 | hsa-miR-647 | -0.16 | N/A | Sites in UTR |
| FAM118A | NM_001104595 | family with sequence similarity 118, member A                                                       | 0 | 0 | 0 | 0 | 1 | 0 | 1 | 0 | hsa-miR-647 | -0.16 | N/A | Sites in UTR |
| OSR1    | NM_145260    | odd-skipped related 1 (Drosophila)                                                                  | 0 | 0 | 0 | 0 | 1 | 0 | 1 | 0 | hsa-miR-647 | -0.16 | N/A | Sites in UTR |
| SRRM3   | NM_001110199 | serine/arginine repetitive matrix 3                                                                 | 0 | 0 | 0 | 0 | 1 | 0 | 1 | 0 | hsa-miR-647 | -0.16 | N/A | Sites in UTR |
| IL6ST   | NM_001190981 | interleukin 6 signal transducer (gp130, oncostatin M receptor)                                      | 0 | 0 | 0 | 0 | 2 | 0 | 0 | 2 | hsa-miR-647 | -0.16 | N/A | Sites in UTR |
| TCF21   | NM_198392    | transcription factor 21                                                                             | 0 | 0 | 0 | 0 | 2 | 0 | 1 | 1 | hsa-miR-647 | -0.16 | N/A | Sites in UTR |
| KCNA1   | NM_000217    | potassium voltage-gated channel, shaker-related subfamily, member 1 (episodic ataxia with myokymia) | 0 | 0 | 0 | 0 | 1 | 0 | 0 | 1 | hsa-miR-647 | -0.15 | N/A | Sites in UTR |

|          |              |                                                                                                         |   |   |   |   |   |   |   |   |             |       |     |              |
|----------|--------------|---------------------------------------------------------------------------------------------------------|---|---|---|---|---|---|---|---|-------------|-------|-----|--------------|
| SLC1A1   | NM_004170    | solute carrier family 1 (neuronal/epithelial high affinity glutamate transporter, system Xag), member 1 | 0 | 0 | 0 | 0 | 1 | 0 | 0 | 1 | hsa-miR-647 | -0.15 | N/A | Sites in UTR |
| ZBBX     | NM_001199201 | zinc finger, B-box domain containing                                                                    | 0 | 0 | 0 | 0 | 1 | 0 | 0 | 1 | hsa-miR-647 | -0.15 | N/A | Sites in UTR |
| ELL3     | NM_025165    | elongation factor RNA polymerase II-like 3                                                              | 0 | 0 | 0 | 0 | 1 | 0 | 0 | 1 | hsa-miR-647 | -0.15 | N/A | Sites in UTR |
| DAOA     | NM_001161812 | D-amino acid oxidase activator                                                                          | 0 | 0 | 0 | 0 | 1 | 0 | 0 | 1 | hsa-miR-647 | -0.15 | N/A | Sites in UTR |
| TMEM194B | NM_001142645 | transmembrane protein 194B                                                                              | 0 | 0 | 0 | 0 | 1 | 0 | 0 | 1 | hsa-miR-647 | -0.15 | N/A | Sites in UTR |
| RNF40    | NM_001207033 | ring finger protein 40                                                                                  | 0 | 0 | 0 | 0 | 2 | 0 | 1 | 1 | hsa-miR-647 | -0.15 | N/A | Sites in UTR |
| BAI1     | NM_001702    | brain-specific angiogenesis inhibitor 1                                                                 | 1 | 0 | 1 | 0 | 0 | 0 | 0 | 0 | hsa-miR-647 | -0.15 | N/A | Sites in UTR |
| GNAT1    | NM_144499    | guanine nucleotide binding protein (G protein), alpha transducing activity polypeptide 1                | 0 | 0 | 0 | 0 | 1 | 0 | 1 | 0 | hsa-miR-647 | -0.15 | N/A | Sites in UTR |
| RNF103   | NM_001198952 | ring finger protein 103                                                                                 | 0 | 0 | 0 | 0 | 1 | 0 | 1 | 0 | hsa-miR-647 | -0.15 | N/A | Sites in UTR |
| SLC7A11  | NM_014331    | solute carrier family 7 (anionic amino acid transporter light chain, xc- system), member 11             | 0 | 0 | 0 | 0 | 1 | 0 | 1 | 0 | hsa-miR-647 | -0.15 | N/A | Sites in UTR |
| PLEKHB2  | NM_001100623 | pleckstrin homology domain containing, family B (evectins) member 2                                     | 0 | 0 | 0 | 0 | 1 | 0 | 1 | 0 | hsa-miR-647 | -0.15 | N/A | Sites in UTR |
| UBE2QL1  | NM_001145161 | ubiquitin-conjugating enzyme E2Q family-like 1                                                          | 0 | 0 | 0 | 0 | 2 | 2 | 0 | 0 | hsa-miR-647 | -0.15 | N/A | Sites in UTR |
| SHC3     | NM_016848    | SHC (Src homology 2 domain containing) transforming protein 3                                           | 0 | 0 | 0 | 0 | 2 | 0 | 2 | 0 | hsa-miR-647 | -0.15 | N/A | Sites in UTR |
| RPS6KA3  | NM_004586    | ribosomal protein S6 kinase, 90kDa, polypeptide 3                                                       | 0 | 0 | 0 | 0 | 1 | 1 | 0 | 0 | hsa-miR-647 | -0.15 | N/A | Sites in UTR |
| NFYA     | NM_002505    | nuclear transcription factor Y, alpha                                                                   | 0 | 0 | 0 | 0 | 2 | 0 | 2 | 0 | hsa-miR-647 | -0.15 | N/A | Sites in UTR |
| TTBK1    | NM_032538    | tau tubulin kinase 1                                                                                    | 0 | 0 | 0 | 0 | 3 | 0 | 1 | 2 | hsa-miR-647 | -0.15 | N/A | Sites in UTR |
| FTL      | NM_000146    | ferritin, light polypeptide                                                                             | 0 | 0 | 0 | 0 | 1 | 0 | 0 | 1 | hsa-miR-647 | -0.15 | N/A | Sites in UTR |
| 2-Sep    | NM_001008491 | septin 2                                                                                                | 0 | 0 | 0 | 0 | 1 | 0 | 0 | 1 | hsa-miR-647 | -0.15 | N/A | Sites in UTR |

|          |              |                                                                   |   |   |   |   |   |   |   |   |             |       |     |              |
|----------|--------------|-------------------------------------------------------------------|---|---|---|---|---|---|---|---|-------------|-------|-----|--------------|
| KCNQ1    | NM_000218    | potassium voltage-gated channel, KQT-like subfamily, member 1     | 0 | 0 | 0 | 0 | 1 | 0 | 1 | 0 | hsa-miR-647 | -0.15 | N/A | Sites in UTR |
| MAX      | NM_002382    | MYC associated factor X                                           | 0 | 0 | 0 | 0 | 1 | 0 | 1 | 0 | hsa-miR-647 | -0.15 | N/A | Sites in UTR |
| TPD52L2  | NM_003288    | tumor protein D52-like 2                                          | 0 | 0 | 0 | 0 | 1 | 0 | 1 | 0 | hsa-miR-647 | -0.15 | N/A | Sites in UTR |
| ZNF3     | NM_032924    | zinc finger protein 3                                             | 0 | 0 | 0 | 0 | 1 | 0 | 1 | 0 | hsa-miR-647 | -0.15 | N/A | Sites in UTR |
| RASSF7   | NM_001143993 | Ras association (RalGDS/AF-6) domain family (N-terminal) member 7 | 0 | 0 | 0 | 0 | 1 | 0 | 1 | 0 | hsa-miR-647 | -0.15 | N/A | Sites in UTR |
| CCR9     | NM_006641    | chemokine (C-C motif) receptor 9                                  | 0 | 0 | 0 | 0 | 1 | 0 | 1 | 0 | hsa-miR-647 | -0.15 | N/A | Sites in UTR |
| ING4     | NM_001127582 | inhibitor of growth family, member 4                              | 0 | 0 | 0 | 0 | 1 | 0 | 1 | 0 | hsa-miR-647 | -0.15 | N/A | Sites in UTR |
| SETD4    | NM_017438    | SET domain containing 4                                           | 0 | 0 | 0 | 0 | 1 | 0 | 1 | 0 | hsa-miR-647 | -0.15 | N/A | Sites in UTR |
| NKAIN1   | NM_024522    | Na <sup>+</sup> /K <sup>+</sup> transporting ATPase interacting 1 | 0 | 0 | 0 | 0 | 1 | 0 | 1 | 0 | hsa-miR-647 | -0.15 | N/A | Sites in UTR |
| IL34     | NM_001172771 | interleukin 34                                                    | 0 | 0 | 0 | 0 | 1 | 0 | 1 | 0 | hsa-miR-647 | -0.15 | N/A | Sites in UTR |
| MMD2     | NM_001100600 | monocyte to macrophage differentiation-associated 2               | 0 | 0 | 0 | 0 | 1 | 0 | 1 | 0 | hsa-miR-647 | -0.15 | N/A | Sites in UTR |
| FLNB     | NM_001164317 | filamin B, beta                                                   | 0 | 0 | 0 | 0 | 2 | 0 | 1 | 1 | hsa-miR-647 | -0.15 | N/A | Sites in UTR |
| SCNN1G   | NM_001039    | sodium channel, nonvoltage-gated 1, gamma                         | 0 | 0 | 0 | 0 | 1 | 0 | 0 | 1 | hsa-miR-647 | -0.15 | N/A | Sites in UTR |
| SIX3     | NM_005413    | SIX homeobox 3                                                    | 0 | 0 | 0 | 0 | 1 | 0 | 0 | 1 | hsa-miR-647 | -0.15 | N/A | Sites in UTR |
| PRDX6    | NM_004905    | peroxiredoxin 6                                                   | 0 | 0 | 0 | 0 | 1 | 0 | 0 | 1 | hsa-miR-647 | -0.15 | N/A | Sites in UTR |
| ZCCHC11  | NM_001009881 | zinc finger, CCHC domain containing 11                            | 0 | 0 | 0 | 0 | 1 | 0 | 0 | 1 | hsa-miR-647 | -0.15 | N/A | Sites in UTR |
| FIGL1    | NM_001042762 | fidgetin-like 1                                                   | 0 | 0 | 0 | 0 | 1 | 0 | 0 | 1 | hsa-miR-647 | -0.15 | N/A | Sites in UTR |
| C15orf41 | NM_032499    | chromosome 15 open reading frame 41                               | 1 | 0 | 0 | 1 | 0 | 0 | 0 | 0 | hsa-miR-647 | -0.15 | N/A | Sites in UTR |



|          |              |                                                                                              |   |   |   |   |   |   |   |   |             |       |     |              |
|----------|--------------|----------------------------------------------------------------------------------------------|---|---|---|---|---|---|---|---|-------------|-------|-----|--------------|
| CCDC149  | NM_001130726 | coiled-coil domain containing 149                                                            | 0 | 0 | 0 | 0 | 1 | 0 | 0 | 1 | hsa-miR-647 | -0.15 | N/A | Sites in UTR |
| ZDHHC20  | NM_153251    | zinc finger, DHHC-type containing 20                                                         | 0 | 0 | 0 | 0 | 1 | 0 | 0 | 1 | hsa-miR-647 | -0.15 | N/A | Sites in UTR |
| LPP      | NM_001167671 | LIM domain containing preferred translocation partner in lipoma                              | 0 | 0 | 0 | 0 | 1 | 0 | 1 | 0 | hsa-miR-647 | -0.15 | N/A | Sites in UTR |
| AK3      | NM_001199852 | adenylate kinase 3                                                                           | 1 | 0 | 1 | 0 | 0 | 0 | 0 | 0 | hsa-miR-647 | -0.15 | N/A | Sites in UTR |
| NHSL1    | NM_001144060 | NHS-like 1                                                                                   | 1 | 0 | 1 | 0 | 0 | 0 | 0 | 0 | hsa-miR-647 | -0.15 | N/A | Sites in UTR |
| G6PC3    | NM_138387    | glucose 6 phosphatase, catalytic, 3                                                          | 0 | 0 | 0 | 0 | 1 | 0 | 1 | 0 | hsa-miR-647 | -0.15 | N/A | Sites in UTR |
| ZNF25    | NM_145011    | zinc finger protein 25                                                                       | 0 | 0 | 0 | 0 | 1 | 0 | 1 | 0 | hsa-miR-647 | -0.15 | N/A | Sites in UTR |
| PRRT4    | NM_001114726 | proline-rich transmembrane protein 4                                                         | 0 | 0 | 0 | 0 | 1 | 0 | 1 | 0 | hsa-miR-647 | -0.15 | N/A | Sites in UTR |
| GTF2H5   | NM_207118    | general transcription factor IIH, polypeptide 5                                              | 0 | 0 | 0 | 0 | 2 | 2 | 0 | 0 | hsa-miR-647 | -0.15 | N/A | Sites in UTR |
| NAA50    | NM_025146    | N(alpha)-acetyltransferase 50, NatE catalytic subunit                                        | 0 | 0 | 0 | 0 | 2 | 0 | 1 | 1 | hsa-miR-647 | -0.15 | N/A | Sites in UTR |
| C18orf1  | NM_001003674 | chromosome 18 open reading frame 1                                                           | 1 | 1 | 0 | 0 | 3 | 0 | 2 | 1 | hsa-miR-647 | -0.15 | N/A | Sites in UTR |
| DYNC1LI2 | NM_006141    | dynein, cytoplasmic 1, light intermediate chain 2                                            | 0 | 0 | 0 | 0 | 1 | 0 | 0 | 1 | hsa-miR-647 | -0.15 | N/A | Sites in UTR |
| CSF1     | NM_000757    | colony stimulating factor 1 (macrophage)                                                     | 0 | 0 | 0 | 0 | 1 | 0 | 1 | 0 | hsa-miR-647 | -0.15 | N/A | Sites in UTR |
| SERPINA1 | NM_000295    | serpin peptidase inhibitor, clade A (alpha-1 antiproteinase, antitrypsin), member 1          | 0 | 0 | 0 | 0 | 1 | 0 | 1 | 0 | hsa-miR-647 | -0.15 | N/A | Sites in UTR |
| PLEKHA2  | NM_021623    | pleckstrin homology domain containing, family A (phosphoinositide binding specific) member 2 | 0 | 0 | 0 | 0 | 1 | 0 | 1 | 0 | hsa-miR-647 | -0.15 | N/A | Sites in UTR |
| MRPS26   | NM_030811    | mitochondrial ribosomal protein S26                                                          | 0 | 0 | 0 | 0 | 1 | 0 | 1 | 0 | hsa-miR-647 | -0.15 | N/A | Sites in UTR |
| MMEL1    | NM_033467    | membrane metallo-endopeptidase-like 1                                                        | 0 | 0 | 0 | 0 | 1 | 0 | 1 | 0 | hsa-miR-647 | -0.15 | N/A | Sites in UTR |
| SLC25A29 | NM_001039355 | solute carrier family 25, member 29                                                          | 0 | 0 | 0 | 0 | 1 | 0 | 1 | 0 | hsa-miR-647 | -0.15 | N/A | Sites in UTR |

|          |              |                                                                                              |   |   |   |   |   |   |   |   |             |       |     |              |
|----------|--------------|----------------------------------------------------------------------------------------------|---|---|---|---|---|---|---|---|-------------|-------|-----|--------------|
| ENPEP    | NM_001977    | glutamyl aminopeptidase (aminopeptidase A)                                                   | 0 | 0 | 0 | 0 | 1 | 0 | 0 | 1 | hsa-miR-647 | -0.15 | N/A | Sites in UTR |
| PLEKHA8  | NM_001197026 | pleckstrin homology domain containing, family A (phosphoinositide binding specific) member 8 | 0 | 0 | 0 | 0 | 1 | 0 | 0 | 1 | hsa-miR-647 | -0.15 | N/A | Sites in UTR |
| MMGT1    | NM_173470    | membrane magnesium transporter 1                                                             | 0 | 0 | 0 | 0 | 1 | 0 | 0 | 1 | hsa-miR-647 | -0.15 | N/A | Sites in UTR |
| TCF20    | NM_005650    | transcription factor 20 (AR1)                                                                | 1 | 0 | 1 | 0 | 0 | 0 | 0 | 0 | hsa-miR-647 | -0.15 | N/A | Sites in UTR |
| HAP1     | NM_001079870 | huntingtin-associated protein 1                                                              | 0 | 0 | 0 | 0 | 1 | 0 | 1 | 0 | hsa-miR-647 | -0.15 | N/A | Sites in UTR |
| 10-Mar   | NM_001100875 | membrane-associated ring finger (C3HC4) 10                                                   | 0 | 0 | 0 | 0 | 1 | 0 | 1 | 0 | hsa-miR-647 | -0.15 | N/A | Sites in UTR |
| SYNPO2   | NM_001128933 | synaptopodin 2                                                                               | 0 | 0 | 0 | 0 | 2 | 0 | 1 | 1 | hsa-miR-647 | -0.15 | N/A | Sites in UTR |
| SLC25A34 | NM_207348    | solute carrier family 25, member 34                                                          | 0 | 0 | 0 | 0 | 2 | 0 | 0 | 2 | hsa-miR-647 | -0.15 | N/A | Sites in UTR |
| FAM160B2 | NM_022749    | family with sequence similarity 160, member B2                                               | 1 | 0 | 1 | 0 | 1 | 0 | 1 | 0 | hsa-miR-647 | -0.15 | N/A | Sites in UTR |
| SLC30A7  | NM_001144884 | solute carrier family 30 (zinc transporter), member 7                                        | 1 | 1 | 0 | 0 | 0 | 0 | 0 | 0 | hsa-miR-647 | -0.15 | N/A | Sites in UTR |
| SOX5     | NM_006940    | SRY (sex determining region Y)-box 5                                                         | 0 | 0 | 0 | 0 | 1 | 0 | 0 | 1 | hsa-miR-647 | -0.15 | N/A | Sites in UTR |
| WNT2     | NM_003391    | wingless-type MMTV integration site family member 2                                          | 0 | 0 | 0 | 0 | 1 | 0 | 0 | 1 | hsa-miR-647 | -0.15 | N/A | Sites in UTR |
| MAGI1    | NM_001033057 | membrane associated guanylate kinase, WW and PDZ domain containing 1                         | 0 | 0 | 0 | 0 | 1 | 0 | 0 | 1 | hsa-miR-647 | -0.15 | N/A | Sites in UTR |
| RASGRP1  | NM_001128602 | RAS guanyl releasing protein 1 (calcium and DAG-regulated)                                   | 0 | 0 | 0 | 0 | 1 | 0 | 0 | 1 | hsa-miR-647 | -0.15 | N/A | Sites in UTR |
| AIDA     | NM_022831    | axin interactor, dorsalization associated                                                    | 0 | 0 | 0 | 0 | 1 | 0 | 0 | 1 | hsa-miR-647 | -0.15 | N/A | Sites in UTR |
| FCHSD1   | NM_033449    | FCH and double SH3 domains 1                                                                 | 0 | 0 | 0 | 0 | 1 | 0 | 0 | 1 | hsa-miR-647 | -0.15 | N/A | Sites in UTR |
| PRR20A   | NM_198441    | proline rich 20A                                                                             | 0 | 0 | 0 | 0 | 1 | 0 | 0 | 1 | hsa-miR-647 | -0.15 | N/A | Sites in UTR |
| DGAT2L6  | NM_198512    | diacylglycerol O-acyltransferase 2-like 6                                                    | 0 | 0 | 0 | 0 | 1 | 0 | 0 | 1 | hsa-miR-647 | -0.15 | N/A | Sites in UTR |

|         |              |                                                                           |   |   |   |   |   |   |   |   |             |       |     |              |
|---------|--------------|---------------------------------------------------------------------------|---|---|---|---|---|---|---|---|-------------|-------|-----|--------------|
| PRR20B  | NM_001130404 | proline rich 20B                                                          | 0 | 0 | 0 | 0 | 1 | 0 | 0 | 1 | hsa-miR-647 | -0.15 | N/A | Sites in UTR |
| PRR20C  | NM_001130405 | proline rich 20C                                                          | 0 | 0 | 0 | 0 | 1 | 0 | 0 | 1 | hsa-miR-647 | -0.15 | N/A | Sites in UTR |
| PRR20D  | NM_001130406 | proline rich 20D                                                          | 0 | 0 | 0 | 0 | 1 | 0 | 0 | 1 | hsa-miR-647 | -0.15 | N/A | Sites in UTR |
| PRR20E  | NM_001130407 | proline rich 20E                                                          | 0 | 0 | 0 | 0 | 1 | 0 | 0 | 1 | hsa-miR-647 | -0.15 | N/A | Sites in UTR |
| ACE     | NM_000789    | angiotensin I converting enzyme (peptidyl-dipeptidase A) 1                | 0 | 0 | 0 | 0 | 1 | 0 | 1 | 0 | hsa-miR-647 | -0.15 | N/A | Sites in UTR |
| HIP1    | NM_005338    | huntingtin interacting protein 1                                          | 0 | 0 | 0 | 0 | 1 | 0 | 1 | 0 | hsa-miR-647 | -0.15 | N/A | Sites in UTR |
| CCL21   | NM_002989    | chemokine (C-C motif) ligand 21                                           | 0 | 0 | 0 | 0 | 1 | 0 | 1 | 0 | hsa-miR-647 | -0.15 | N/A | Sites in UTR |
| GOSR2   | NM_004287    | golgi SNAP receptor complex member 2                                      | 0 | 0 | 0 | 0 | 1 | 0 | 1 | 0 | hsa-miR-647 | -0.15 | N/A | Sites in UTR |
| FBXO9   | NM_012347    | F-box protein 9                                                           | 0 | 0 | 0 | 0 | 1 | 0 | 1 | 0 | hsa-miR-647 | -0.15 | N/A | Sites in UTR |
| MIER1   | NM_001077700 | mesoderm induction early response 1 homolog (Xenopus laevis)              | 1 | 0 | 1 | 0 | 0 | 0 | 0 | 0 | hsa-miR-647 | -0.15 | N/A | Sites in UTR |
| SMTNL1  | NM_001105565 | smoothelin-like 1                                                         | 0 | 0 | 0 | 0 | 1 | 0 | 1 | 0 | hsa-miR-647 | -0.15 | N/A | Sites in UTR |
| MKX     | NM_001242702 | mohawk homeobox                                                           | 0 | 0 | 0 | 0 | 1 | 0 | 1 | 0 | hsa-miR-647 | -0.15 | N/A | Sites in UTR |
| ARID5B  | NM_032199    | AT rich interactive domain 5B (MRF1-like)                                 | 0 | 0 | 0 | 0 | 2 | 0 | 0 | 2 | hsa-miR-647 | -0.15 | N/A | Sites in UTR |
| GPX7    | NM_015696    | glutathione peroxidase 7                                                  | 0 | 0 | 0 | 0 | 1 | 0 | 0 | 1 | hsa-miR-647 | -0.15 | N/A | Sites in UTR |
| KIF2A   | NM_001098511 | kinesin heavy chain member 2A                                             | 0 | 0 | 0 | 0 | 1 | 0 | 0 | 1 | hsa-miR-647 | -0.15 | N/A | Sites in UTR |
| NFATC1  | NM_172390    | nuclear factor of activated T-cells, cytoplasmic, calcineurin-dependent 1 | 0 | 0 | 0 | 0 | 1 | 0 | 0 | 1 | hsa-miR-647 | -0.15 | N/A | Sites in UTR |
| C1orf38 | NM_001039477 | chromosome 1 open reading frame 38                                        | 0 | 0 | 0 | 0 | 1 | 0 | 0 | 1 | hsa-miR-647 | -0.15 | N/A | Sites in UTR |
| GOLIM4  | NM_014498    | golgi integral membrane protein 4                                         | 0 | 0 | 0 | 0 | 1 | 0 | 0 | 1 | hsa-miR-647 | -0.15 | N/A | Sites in UTR |

|          |              |                                                                  |   |   |   |   |   |   |   |   |             |       |     |              |
|----------|--------------|------------------------------------------------------------------|---|---|---|---|---|---|---|---|-------------|-------|-----|--------------|
| PBRM1    | NM_018165    | polybromo 1                                                      | 0 | 0 | 0 | 0 | 1 | 0 | 0 | 1 | hsa-miR-647 | -0.15 | N/A | Sites in UTR |
| CNKSR3   | NM_173515    | CNKSR family member 3                                            | 0 | 0 | 0 | 0 | 1 | 0 | 0 | 1 | hsa-miR-647 | -0.15 | N/A | Sites in UTR |
| TMEM233  | NM_001136534 | transmembrane protein 233                                        | 0 | 0 | 0 | 0 | 1 | 0 | 0 | 1 | hsa-miR-647 | -0.15 | N/A | Sites in UTR |
| CLU1     | NM_001025233 | chronic lymphocytic leukemia up-regulated 1                      | 0 | 0 | 0 | 0 | 1 | 0 | 0 | 1 | hsa-miR-647 | -0.15 | N/A | Sites in UTR |
| TEC      | NM_003215    | tec protein tyrosine kinase                                      | 0 | 0 | 0 | 0 | 1 | 0 | 1 | 0 | hsa-miR-647 | -0.15 | N/A | Sites in UTR |
| TMEM194A | NM_001130963 | transmembrane protein 194A                                       | 0 | 0 | 0 | 0 | 1 | 0 | 1 | 0 | hsa-miR-647 | -0.15 | N/A | Sites in UTR |
| HSD17B12 | NM_016142    | hydroxysteroid (17-beta) dehydrogenase 12                        | 0 | 0 | 0 | 0 | 1 | 0 | 1 | 0 | hsa-miR-647 | -0.15 | N/A | Sites in UTR |
| SYT13    | NM_020826    | synaptotagmin XIII                                               | 0 | 0 | 0 | 0 | 1 | 0 | 1 | 0 | hsa-miR-647 | -0.15 | N/A | Sites in UTR |
| FAM100B  | NM_182565    | family with sequence similarity 100, member B                    | 0 | 0 | 0 | 0 | 1 | 0 | 1 | 0 | hsa-miR-647 | -0.15 | N/A | Sites in UTR |
| HAS3     | NM_001199280 | hyaluronan synthase 3                                            | 0 | 0 | 0 | 0 | 2 | 0 | 0 | 2 | hsa-miR-647 | -0.15 | N/A | Sites in UTR |
| BTBD9    | NM_001099272 | BTB (POZ) domain containing 9                                    | 0 | 0 | 0 | 0 | 4 | 0 | 4 | 0 | hsa-miR-647 | -0.15 | N/A | Sites in UTR |
| CREBL2   | NM_001310    | cAMP responsive element binding protein-like 2                   | 0 | 0 | 0 | 0 | 1 | 0 | 0 | 1 | hsa-miR-647 | -0.15 | N/A | Sites in UTR |
| SEC22C   | NM_032970    | SEC22 vesicle trafficking protein homolog C (S. cerevisiae)      | 0 | 0 | 0 | 0 | 1 | 0 | 0 | 1 | hsa-miR-647 | -0.15 | N/A | Sites in UTR |
| WDR41    | NM_018268    | WD repeat domain 41                                              | 0 | 0 | 0 | 0 | 1 | 0 | 0 | 1 | hsa-miR-647 | -0.15 | N/A | Sites in UTR |
| CHD9     | NM_025134    | chromodomain helicase DNA binding protein 9                      | 0 | 0 | 0 | 0 | 1 | 0 | 0 | 1 | hsa-miR-647 | -0.15 | N/A | Sites in UTR |
| EXD1     | NM_152596    | exonuclease 3'-5' domain containing 1                            | 0 | 0 | 0 | 0 | 1 | 0 | 0 | 1 | hsa-miR-647 | -0.15 | N/A | Sites in UTR |
| TMEM81   | NM_203376    | transmembrane protein 81                                         | 0 | 0 | 0 | 0 | 1 | 0 | 0 | 1 | hsa-miR-647 | -0.15 | N/A | Sites in UTR |
| MTHFD2L  | NM_001144978 | methylenetetrahydrofolate dehydrogenase (NADP+ dependent) 2-like | 0 | 0 | 0 | 0 | 1 | 0 | 0 | 1 | hsa-miR-647 | -0.15 | N/A | Sites in UTR |

|         |              |                                                           |   |   |   |   |   |   |   |   |             |       |     |              |
|---------|--------------|-----------------------------------------------------------|---|---|---|---|---|---|---|---|-------------|-------|-----|--------------|
| NKX2-5  | NM_001166175 | NK2 homeobox 5                                            | 0 | 0 | 0 | 0 | 1 | 0 | 1 | 0 | hsa-miR-647 | -0.15 | N/A | Sites in UTR |
| SYT4    | NM_020783    | synaptotagmin IV                                          | 0 | 0 | 0 | 0 | 1 | 0 | 1 | 0 | hsa-miR-647 | -0.15 | N/A | Sites in UTR |
| CHERP   | NM_006387    | calcium homeostasis endoplasmic reticulum protein         | 0 | 0 | 0 | 0 | 1 | 0 | 1 | 0 | hsa-miR-647 | -0.15 | N/A | Sites in UTR |
| SPSB1   | NM_025106    | splA/ryanodine receptor domain and SOCS box containing 1  | 0 | 0 | 0 | 0 | 1 | 0 | 1 | 0 | hsa-miR-647 | -0.15 | N/A | Sites in UTR |
| ATAD1   | NM_032810    | ATPase family, AAA domain containing 1                    | 0 | 0 | 0 | 0 | 1 | 0 | 1 | 0 | hsa-miR-647 | -0.15 | N/A | Sites in UTR |
| TMEM80  | NM_001042463 | transmembrane protein 80                                  | 0 | 0 | 0 | 0 | 1 | 0 | 1 | 0 | hsa-miR-647 | -0.15 | N/A | Sites in UTR |
| POTEF   | NM_001099771 | POTE ankyrin domain family, member F                      | 0 | 0 | 0 | 0 | 1 | 0 | 1 | 0 | hsa-miR-647 | -0.15 | N/A | Sites in UTR |
| KCTD15  | NM_001129994 | potassium channel tetramerisation domain containing 15    | 0 | 0 | 0 | 0 | 2 | 0 | 2 | 0 | hsa-miR-647 | -0.15 | N/A | Sites in UTR |
| ICK     | NM_014920    | intestinal cell (MAK-like) kinase                         | 0 | 0 | 0 | 0 | 2 | 0 | 1 | 1 | hsa-miR-647 | -0.15 | N/A | Sites in UTR |
| TLL5    | NM_015072    | tubulin tyrosine ligase-like family, member 5             | 0 | 0 | 0 | 0 | 1 | 0 | 0 | 1 | hsa-miR-647 | -0.15 | N/A | Sites in UTR |
| ERLEC1  | NM_001127397 | endoplasmic reticulum lectin 1                            | 0 | 0 | 0 | 0 | 1 | 0 | 0 | 1 | hsa-miR-647 | -0.15 | N/A | Sites in UTR |
| PAK7    | NM_020341    | p21 protein (Cdc42/Rac)-activated kinase 7                | 0 | 0 | 0 | 0 | 1 | 0 | 0 | 1 | hsa-miR-647 | -0.15 | N/A | Sites in UTR |
| SLC47A2 | NM_001099646 | solute carrier family 47, member 2                        | 0 | 0 | 0 | 0 | 1 | 0 | 0 | 1 | hsa-miR-647 | -0.15 | N/A | Sites in UTR |
| BTNL9   | NM_152547    | butyrophilin-like 9                                       | 0 | 0 | 0 | 0 | 1 | 0 | 0 | 1 | hsa-miR-647 | -0.15 | N/A | Sites in UTR |
| ITPR2   | NM_002223    | inositol 1,4,5-trisphosphate receptor, type 2             | 1 | 0 | 1 | 0 | 0 | 0 | 0 | 0 | hsa-miR-647 | -0.15 | N/A | Sites in UTR |
| TPMT    | NM_000367    | thiopurine S-methyltransferase                            | 0 | 0 | 0 | 0 | 1 | 0 | 1 | 0 | hsa-miR-647 | -0.15 | N/A | Sites in UTR |
| PACSIN2 | NM_001184970 | protein kinase C and casein kinase substrate in neurons 2 | 0 | 0 | 0 | 0 | 1 | 0 | 1 | 0 | hsa-miR-647 | -0.15 | N/A | Sites in UTR |
| CCDC13  | NM_144719    | coiled-coil domain containing 13                          | 0 | 0 | 0 | 0 | 1 | 0 | 1 | 0 | hsa-miR-647 | -0.15 | N/A | Sites in UTR |

|          |              |                                                                                   |   |   |   |   |   |   |   |   |             |       |     |              |
|----------|--------------|-----------------------------------------------------------------------------------|---|---|---|---|---|---|---|---|-------------|-------|-----|--------------|
| ZC3H12D  | NM_207360    | zinc finger CCCH-type containing 12D                                              | 0 | 0 | 0 | 0 | 1 | 0 | 1 | 0 | hsa-miR-647 | -0.15 | N/A | Sites in UTR |
| CBLN3    | NM_001039771 | cerebellin 3 precursor                                                            | 0 | 0 | 0 | 0 | 1 | 0 | 1 | 0 | hsa-miR-647 | -0.15 | N/A | Sites in UTR |
| D2HGDH   | NM_152783    | D-2-hydroxyglutarate dehydrogenase                                                | 0 | 0 | 0 | 0 | 1 | 0 | 1 | 0 | hsa-miR-647 | -0.15 | N/A | Sites in UTR |
| RGS6     | NM_001204416 | regulator of G-protein signaling 6                                                | 0 | 0 | 0 | 0 | 4 | 1 | 1 | 2 | hsa-miR-647 | -0.15 | N/A | Sites in UTR |
| KIAA1045 | NM_015297    | KIAA1045                                                                          | 1 | 0 | 1 | 0 | 2 | 0 | 1 | 1 | hsa-miR-647 | -0.15 | N/A | Sites in UTR |
| SMPD3    | NM_018667    | sphingomyelin phosphodiesterase 3, neutral membrane (neutral sphingomyelinase II) | 1 | 0 | 0 | 1 | 2 | 0 | 1 | 1 | hsa-miR-647 | -0.15 | N/A | Sites in UTR |
| WASF2    | NM_001201404 | WAS protein family, member 2                                                      | 1 | 1 | 0 | 0 | 3 | 0 | 2 | 1 | hsa-miR-647 | -0.15 | N/A | Sites in UTR |
| SYN2     | NM_003178    | synapsin II                                                                       | 0 | 0 | 0 | 0 | 1 | 0 | 0 | 1 | hsa-miR-647 | -0.15 | N/A | Sites in UTR |
| PPIL2    | NM_014337    | peptidylprolyl isomerase (cyclophilin)-like 2                                     | 0 | 0 | 0 | 0 | 1 | 0 | 0 | 1 | hsa-miR-647 | -0.15 | N/A | Sites in UTR |
| POLDIP2  | NM_015584    | polymerase (DNA-directed), delta interacting protein 2                            | 0 | 0 | 0 | 0 | 1 | 0 | 0 | 1 | hsa-miR-647 | -0.15 | N/A | Sites in UTR |
| ERI2     | NM_001142725 | ERI1 exoribonuclease family member 2                                              | 0 | 0 | 0 | 0 | 1 | 0 | 0 | 1 | hsa-miR-647 | -0.15 | N/A | Sites in UTR |
| PTBP1    | NM_002819    | polypyrimidine tract binding protein 1                                            | 0 | 0 | 0 | 0 | 1 | 0 | 1 | 0 | hsa-miR-647 | -0.15 | N/A | Sites in UTR |
| HHLA1    | NM_001145095 | HERV-H LTR-associating 1                                                          | 0 | 0 | 0 | 0 | 1 | 0 | 1 | 0 | hsa-miR-647 | -0.15 | N/A | Sites in UTR |
| KRI1     | NM_023008    | KRI1 homolog ( <i>S. cerevisiae</i> )                                             | 0 | 0 | 0 | 0 | 1 | 0 | 1 | 0 | hsa-miR-647 | -0.15 | N/A | Sites in UTR |
| C3orf25  | NM_207307    | chromosome 3 open reading frame 25                                                | 0 | 0 | 0 | 0 | 1 | 0 | 1 | 0 | hsa-miR-647 | -0.15 | N/A | Sites in UTR |
| RNF180   | NM_001113561 | ring finger protein 180                                                           | 0 | 0 | 0 | 0 | 1 | 0 | 1 | 0 | hsa-miR-647 | -0.15 | N/A | Sites in UTR |
| PRKCA    | NM_002737    | protein kinase C, alpha                                                           | 0 | 0 | 0 | 0 | 3 | 1 | 1 | 1 | hsa-miR-647 | -0.15 | N/A | Sites in UTR |
| TFAM     | NM_003201    | transcription factor A, mitochondrial                                             | 0 | 0 | 0 | 0 | 1 | 0 | 0 | 1 | hsa-miR-647 | -0.14 | N/A | Sites in UTR |

|        |              |                                                                                                           |   |   |   |   |   |   |   |   |             |       |     |              |
|--------|--------------|-----------------------------------------------------------------------------------------------------------|---|---|---|---|---|---|---|---|-------------|-------|-----|--------------|
| KDM6A  | NM_021140    | lysine (K)-specific demethylase 6A                                                                        | 1 | 0 | 0 | 1 | 0 | 0 | 0 | 0 | hsa-miR-647 | -0.14 | N/A | Sites in UTR |
| RUFY3  | NM_014961    | RUN and FYVE domain containing 3                                                                          | 0 | 0 | 0 | 0 | 1 | 0 | 0 | 1 | hsa-miR-647 | -0.14 | N/A | Sites in UTR |
| ADCK3  | NM_020247    | aarF domain containing kinase 3                                                                           | 0 | 0 | 0 | 0 | 1 | 0 | 0 | 1 | hsa-miR-647 | -0.14 | N/A | Sites in UTR |
| RFWD2  | NM_001001740 | ring finger and WD repeat domain 2                                                                        | 0 | 0 | 0 | 0 | 1 | 0 | 0 | 1 | hsa-miR-647 | -0.14 | N/A | Sites in UTR |
| NSUN7  | NM_024677    | NOP2/Sun domain family, member 7                                                                          | 0 | 0 | 0 | 0 | 1 | 0 | 0 | 1 | hsa-miR-647 | -0.14 | N/A | Sites in UTR |
| ATP2B2 | NM_001001331 | ATPase, Ca++ transporting, plasma membrane 2                                                              | 0 | 0 | 0 | 0 | 1 | 0 | 1 | 0 | hsa-miR-647 | -0.14 | N/A | Sites in UTR |
| BGN    | NM_001711    | biglycan                                                                                                  | 0 | 0 | 0 | 0 | 2 | 0 | 2 | 0 | hsa-miR-647 | -0.14 | N/A | Sites in UTR |
| RYR2   | NM_001035    | ryanodine receptor 2 (cardiac)                                                                            | 0 | 0 | 0 | 0 | 1 | 0 | 1 | 0 | hsa-miR-647 | -0.14 | N/A | Sites in UTR |
| CCL25  | NM_001201359 | chemokine (C-C motif) ligand 25                                                                           | 0 | 0 | 0 | 0 | 1 | 0 | 1 | 0 | hsa-miR-647 | -0.14 | N/A | Sites in UTR |
| PRPF4  | NM_004697    | PRP4 pre-mRNA processing factor 4 homolog (yeast)                                                         | 0 | 0 | 0 | 0 | 1 | 0 | 1 | 0 | hsa-miR-647 | -0.14 | N/A | Sites in UTR |
| NSUN5  | NM_001168347 | NOP2/Sun domain family, member 5                                                                          | 0 | 0 | 0 | 0 | 1 | 0 | 1 | 0 | hsa-miR-647 | -0.14 | N/A | Sites in UTR |
| LRRC8A | NM_001127244 | leucine rich repeat containing 8 family, member A                                                         | 0 | 0 | 0 | 0 | 1 | 0 | 1 | 0 | hsa-miR-647 | -0.14 | N/A | Sites in UTR |
| NAV1   | NM_001167738 | neuron navigator 1                                                                                        | 0 | 0 | 0 | 0 | 2 | 0 | 1 | 1 | hsa-miR-647 | -0.14 | N/A | Sites in UTR |
| PPFIA4 | NM_015053    | protein tyrosine phosphatase, receptor type, f polypeptide (PTPRF), interacting protein (liprin), alpha 4 | 0 | 0 | 0 | 0 | 2 | 0 | 2 | 0 | hsa-miR-647 | -0.14 | N/A | Sites in UTR |
| ATG2B  | NM_018036    | ATG2 autophagy related 2 homolog B (S. cerevisiae)                                                        | 0 | 0 | 0 | 0 | 3 | 0 | 1 | 2 | hsa-miR-647 | -0.14 | N/A | Sites in UTR |
| RRP7A  | NM_015703    | ribosomal RNA processing 7 homolog A (S. cerevisiae)                                                      | 0 | 0 | 0 | 0 | 2 | 0 | 2 | 0 | hsa-miR-647 | -0.14 | N/A | Sites in UTR |
| KLF6   | NM_001160124 | Kruppel-like factor 6                                                                                     | 1 | 0 | 0 | 1 | 0 | 0 | 0 | 0 | hsa-miR-647 | -0.14 | N/A | Sites in UTR |
| E2F6   | NM_198256    | E2F transcription factor 6                                                                                | 0 | 0 | 0 | 0 | 1 | 0 | 0 | 1 | hsa-miR-647 | -0.14 | N/A | Sites in UTR |

|          |              |                                                                                 |   |   |   |   |   |   |   |   |             |       |     |              |
|----------|--------------|---------------------------------------------------------------------------------|---|---|---|---|---|---|---|---|-------------|-------|-----|--------------|
| LRRC14   | NM_014665    | leucine rich repeat containing 14                                               | 0 | 0 | 0 | 0 | 1 | 0 | 0 | 1 | hsa-miR-647 | -0.14 | N/A | Sites in UTR |
| KDM3B    | NM_016604    | lysine (K)-specific demethylase 3B                                              | 0 | 0 | 0 | 0 | 1 | 0 | 0 | 1 | hsa-miR-647 | -0.14 | N/A | Sites in UTR |
| RAPH1    | NM_203365    | Ras association (RalGDS/AF-6) and pleckstrin homology domains 1                 | 0 | 0 | 0 | 0 | 1 | 0 | 0 | 1 | hsa-miR-647 | -0.14 | N/A | Sites in UTR |
| MAPKAP1  | NM_001006617 | mitogen-activated protein kinase associated protein 1                           | 0 | 0 | 0 | 0 | 1 | 0 | 0 | 1 | hsa-miR-647 | -0.14 | N/A | Sites in UTR |
| FAM124B  | NM_001122779 | family with sequence similarity 124B                                            | 0 | 0 | 0 | 0 | 1 | 0 | 0 | 1 | hsa-miR-647 | -0.14 | N/A | Sites in UTR |
| C1QL2    | NM_182528    | complement component 1, q subcomponent-like 2                                   | 0 | 0 | 0 | 0 | 1 | 0 | 0 | 1 | hsa-miR-647 | -0.14 | N/A | Sites in UTR |
| SLC26A5  | NM_206883    | solute carrier family 26, member 5 (prestin)                                    | 0 | 0 | 0 | 0 | 1 | 0 | 0 | 1 | hsa-miR-647 | -0.14 | N/A | Sites in UTR |
| OAS2     | NM_016817    | 2'-5'-oligoadenylate synthetase 2, 69/71kDa                                     | 0 | 0 | 0 | 0 | 1 | 0 | 1 | 0 | hsa-miR-647 | -0.14 | N/A | Sites in UTR |
| RNF8     | NM_003958    | ring finger protein 8                                                           | 1 | 0 | 1 | 0 | 0 | 0 | 0 | 0 | hsa-miR-647 | -0.14 | N/A | Sites in UTR |
| RAX      | NM_013435    | retina and anterior neural fold homeobox                                        | 0 | 0 | 0 | 0 | 1 | 0 | 1 | 0 | hsa-miR-647 | -0.14 | N/A | Sites in UTR |
| ARHGAP39 | NM_025251    | Rho GTPase activating protein 39                                                | 0 | 0 | 0 | 0 | 1 | 0 | 1 | 0 | hsa-miR-647 | -0.14 | N/A | Sites in UTR |
| ABHD15   | NM_198147    | abhydrolase domain containing 15                                                | 0 | 0 | 0 | 0 | 1 | 0 | 1 | 0 | hsa-miR-647 | -0.14 | N/A | Sites in UTR |
| DUSP15   | NM_001012644 | dual specificity phosphatase 15                                                 | 1 | 0 | 1 | 0 | 0 | 0 | 0 | 0 | hsa-miR-647 | -0.14 | N/A | Sites in UTR |
| TAF8     | NM_138572    | TAF8 RNA polymerase II, TATA box binding protein (TBP)-associated factor, 43kDa | 0 | 0 | 0 | 0 | 1 | 0 | 1 | 0 | hsa-miR-647 | -0.14 | N/A | Sites in UTR |
| RD3      | NM_001164688 | retinal degeneration 3                                                          | 0 | 0 | 0 | 0 | 1 | 0 | 1 | 0 | hsa-miR-647 | -0.14 | N/A | Sites in UTR |
| TMPPE    | NM_001039770 | transmembrane protein with metallophosphoesterase domain                        | 0 | 0 | 0 | 0 | 2 | 0 | 2 | 0 | hsa-miR-647 | -0.14 | N/A | Sites in UTR |
| SOLH     | NM_005632    | small optic lobes homolog (Drosophila)                                          | 0 | 0 | 0 | 0 | 2 | 0 | 1 | 1 | hsa-miR-647 | -0.14 | N/A | Sites in UTR |
| IL16     | NM_001172128 | interleukin 16                                                                  | 0 | 0 | 0 | 0 | 1 | 1 | 0 | 0 | hsa-miR-647 | -0.14 | N/A | Sites in UTR |



|         |              |                                                         |   |   |   |   |   |   |   |   |             |       |     |              |
|---------|--------------|---------------------------------------------------------|---|---|---|---|---|---|---|---|-------------|-------|-----|--------------|
| AFF1    | NM_001166693 | AF4/FMR2 family, member 1                               | 0 | 0 | 0 | 0 | 2 | 0 | 1 | 1 | hsa-miR-647 | -0.14 | N/A | Sites in UTR |
| DNAJC5  | NM_025219    | DnaJ (Hsp40) homolog, subfamily C, member 5             | 0 | 0 | 0 | 0 | 5 | 0 | 5 | 0 | hsa-miR-647 | -0.14 | N/A | Sites in UTR |
| ARAF    | NM_001654    | v-raf murine sarcoma 3611 viral oncogene homolog        | 0 | 0 | 0 | 0 | 1 | 0 | 0 | 1 | hsa-miR-647 | -0.14 | N/A | Sites in UTR |
| EDNRA   | NM_001166055 | endothelin receptor type A                              | 0 | 0 | 0 | 0 | 1 | 0 | 0 | 1 | hsa-miR-647 | -0.14 | N/A | Sites in UTR |
| TGFBR2  | NM_001024847 | transforming growth factor, beta receptor II (70/80kDa) | 0 | 0 | 0 | 0 | 1 | 0 | 0 | 1 | hsa-miR-647 | -0.14 | N/A | Sites in UTR |
| ACOX3   | NM_001101667 | acyl-CoA oxidase 3, pristanoyl                          | 0 | 0 | 0 | 0 | 1 | 0 | 0 | 1 | hsa-miR-647 | -0.14 | N/A | Sites in UTR |
| TBX18   | NM_001080508 | T-box 18                                                | 0 | 0 | 0 | 0 | 1 | 0 | 0 | 1 | hsa-miR-647 | -0.14 | N/A | Sites in UTR |
| PDCD6IP | NM_001162429 | programmed cell death 6 interacting protein             | 0 | 0 | 0 | 0 | 1 | 0 | 0 | 1 | hsa-miR-647 | -0.14 | N/A | Sites in UTR |
| SCLY    | NM_016510    | selenocysteine lyase                                    | 0 | 0 | 0 | 0 | 1 | 0 | 0 | 1 | hsa-miR-647 | -0.14 | N/A | Sites in UTR |
| SFXN3   | NM_030971    | sideroflexin 3                                          | 0 | 0 | 0 | 0 | 1 | 0 | 0 | 1 | hsa-miR-647 | -0.14 | N/A | Sites in UTR |
| ZNF491  | NM_152356    | zinc finger protein 491                                 | 0 | 0 | 0 | 0 | 1 | 0 | 0 | 1 | hsa-miR-647 | -0.14 | N/A | Sites in UTR |
| BOK     | NM_032515    | BCL2-related ovarian killer                             | 0 | 0 | 0 | 0 | 1 | 0 | 1 | 0 | hsa-miR-647 | -0.14 | N/A | Sites in UTR |
| SULT1C2 | NM_001056    | sulfotransferase family, cytosolic, 1C, member 2        | 0 | 0 | 0 | 0 | 1 | 0 | 1 | 0 | hsa-miR-647 | -0.14 | N/A | Sites in UTR |
| TNK1    | NM_003985    | tyrosine kinase, non-receptor, 1                        | 0 | 0 | 0 | 0 | 1 | 0 | 1 | 0 | hsa-miR-647 | -0.14 | N/A | Sites in UTR |
| VWA1    | NM_022834    | von Willebrand factor A domain containing 1             | 0 | 0 | 0 | 0 | 1 | 0 | 1 | 0 | hsa-miR-647 | -0.14 | N/A | Sites in UTR |
| BAHCC1  | NM_001080519 | BAH domain and coiled-coil containing 1                 | 0 | 0 | 0 | 0 | 3 | 0 | 1 | 2 | hsa-miR-647 | -0.14 | N/A | Sites in UTR |
| AARS    | NM_001605    | alanyl-tRNA synthetase                                  | 0 | 0 | 0 | 0 | 1 | 0 | 0 | 1 | hsa-miR-647 | -0.14 | N/A | Sites in UTR |
| ABCF1   | NM_001025091 | ATP-binding cassette, sub-family F (GCN20), member 1    | 0 | 0 | 0 | 0 | 1 | 0 | 0 | 1 | hsa-miR-647 | -0.14 | N/A | Sites in UTR |

|           |              |                                                             |   |   |   |   |   |   |   |   |             |       |     |              |
|-----------|--------------|-------------------------------------------------------------|---|---|---|---|---|---|---|---|-------------|-------|-----|--------------|
| COL11A1   | NM_001190709 | collagen, type XI, alpha 1                                  | 0 | 0 | 0 | 0 | 1 | 0 | 0 | 1 | hsa-miR-647 | -0.14 | N/A | Sites in UTR |
| NRG1      | NM_001159995 | neuregulin 1                                                | 0 | 0 | 0 | 0 | 1 | 0 | 0 | 1 | hsa-miR-647 | -0.14 | N/A | Sites in UTR |
| ELMO1     | NM_001039459 | engulfment and cell motility 1                              | 0 | 0 | 0 | 0 | 1 | 0 | 0 | 1 | hsa-miR-647 | -0.14 | N/A | Sites in UTR |
| KLF3      | NM_016531    | Kruppel-like factor 3 (basic)                               | 0 | 0 | 0 | 0 | 1 | 0 | 0 | 1 | hsa-miR-647 | -0.14 | N/A | Sites in UTR |
| NLGN3     | NM_001166660 | neuroligin 3                                                | 0 | 0 | 0 | 0 | 1 | 0 | 0 | 1 | hsa-miR-647 | -0.14 | N/A | Sites in UTR |
| GPRC5C    | NM_018653    | G protein-coupled receptor, family C, group 5, member C     | 0 | 0 | 0 | 0 | 1 | 0 | 0 | 1 | hsa-miR-647 | -0.14 | N/A | Sites in UTR |
| METTL21D  | NM_001040662 | methyltransferase like 21D                                  | 0 | 0 | 0 | 0 | 1 | 0 | 0 | 1 | hsa-miR-647 | -0.14 | N/A | Sites in UTR |
| NLRCS     | NM_032206    | NLR family, CARD domain containing 5                        | 0 | 0 | 0 | 0 | 1 | 0 | 0 | 1 | hsa-miR-647 | -0.14 | N/A | Sites in UTR |
| CCDC135   | NM_032269    | coiled-coil domain containing 135                           | 0 | 0 | 0 | 0 | 1 | 0 | 0 | 1 | hsa-miR-647 | -0.14 | N/A | Sites in UTR |
| MRFAP1    | NM_033296    | Morf4 family associated protein 1                           | 0 | 0 | 0 | 0 | 1 | 0 | 0 | 1 | hsa-miR-647 | -0.14 | N/A | Sites in UTR |
| NXNL2     | NM_145283    | nucleoredoxin-like 2                                        | 0 | 0 | 0 | 0 | 1 | 0 | 0 | 1 | hsa-miR-647 | -0.14 | N/A | Sites in UTR |
| EPS15     | NM_001159969 | epidermal growth factor receptor pathway substrate 15       | 0 | 0 | 0 | 0 | 1 | 0 | 1 | 0 | hsa-miR-647 | -0.14 | N/A | Sites in UTR |
| NR1I2     | NM_003889    | nuclear receptor subfamily 1, group I, member 2             | 1 | 0 | 1 | 0 | 0 | 0 | 0 | 0 | hsa-miR-647 | -0.14 | N/A | Sites in UTR |
| DDN       | NM_015086    | dendrin                                                     | 0 | 0 | 0 | 0 | 1 | 0 | 1 | 0 | hsa-miR-647 | -0.14 | N/A | Sites in UTR |
| ARHGEF10L | NM_001011722 | Rho guanine nucleotide exchange factor (GEF) 10-like        | 0 | 0 | 0 | 0 | 1 | 0 | 1 | 0 | hsa-miR-647 | -0.14 | N/A | Sites in UTR |
| ANKS1B    | NM_001204065 | ankyrin repeat and sterile alpha motif domain containing 1B | 0 | 0 | 0 | 0 | 1 | 0 | 1 | 0 | hsa-miR-647 | -0.14 | N/A | Sites in UTR |
| VPS37B    | NM_024667    | vacuolar protein sorting 37 homolog B (S. cerevisiae)       | 0 | 0 | 0 | 0 | 1 | 0 | 1 | 0 | hsa-miR-647 | -0.14 | N/A | Sites in UTR |
| TMEM129   | NM_001127266 | transmembrane protein 129                                   | 0 | 0 | 0 | 0 | 1 | 0 | 1 | 0 | hsa-miR-647 | -0.14 | N/A | Sites in UTR |

|          |              |                                                              |   |   |   |   |   |   |   |   |             |       |     |              |
|----------|--------------|--------------------------------------------------------------|---|---|---|---|---|---|---|---|-------------|-------|-----|--------------|
| LPIN2    | NM_014646    | lipin 2                                                      | 0 | 0 | 0 | 0 | 2 | 0 | 2 | 0 | hsa-miR-647 | -0.14 | N/A | Sites in UTR |
| ARHGEF38 | NM_001242729 | Rho guanine nucleotide exchange factor (GEF) 38              | 0 | 0 | 0 | 0 | 1 | 1 | 0 | 0 | hsa-miR-647 | -0.14 | N/A | Sites in UTR |
| ESR1     | NM_000125    | estrogen receptor 1                                          | 0 | 0 | 0 | 0 | 1 | 0 | 0 | 1 | hsa-miR-647 | -0.14 | N/A | Sites in UTR |
| GP1BA    | NM_000173    | glycoprotein Ib (platelet), alpha polypeptide                | 0 | 0 | 0 | 0 | 1 | 0 | 0 | 1 | hsa-miR-647 | -0.14 | N/A | Sites in UTR |
| OPRM1    | NM_000914    | opioid receptor, mu 1                                        | 0 | 0 | 0 | 0 | 1 | 0 | 0 | 1 | hsa-miR-647 | -0.14 | N/A | Sites in UTR |
| CSRP3    | NM_001127656 | cysteine and glycine-rich protein 3 (cardiac LIM protein)    | 0 | 0 | 0 | 0 | 1 | 0 | 0 | 1 | hsa-miR-647 | -0.14 | N/A | Sites in UTR |
| SPEN     | NM_015001    | spen homolog, transcriptional regulator (Drosophila)         | 0 | 0 | 0 | 0 | 1 | 0 | 0 | 1 | hsa-miR-647 | -0.14 | N/A | Sites in UTR |
| HINFP    | NM_015517    | histone H4 transcription factor                              | 0 | 0 | 0 | 0 | 1 | 0 | 0 | 1 | hsa-miR-647 | -0.14 | N/A | Sites in UTR |
| NRN1     | NM_016588    | neuritin 1                                                   | 1 | 0 | 0 | 1 | 0 | 0 | 0 | 0 | hsa-miR-647 | -0.14 | N/A | Sites in UTR |
| FANCM    | NM_020937    | Fanconi anemia, complementation group M                      | 0 | 0 | 0 | 0 | 1 | 0 | 0 | 1 | hsa-miR-647 | -0.14 | N/A | Sites in UTR |
| NADK     | NM_001198993 | NAD kinase                                                   | 0 | 0 | 0 | 0 | 1 | 0 | 0 | 1 | hsa-miR-647 | -0.14 | N/A | Sites in UTR |
| EFHC1    | NM_001172420 | EF-hand domain (C-terminal) containing 1                     | 0 | 0 | 0 | 0 | 1 | 0 | 0 | 1 | hsa-miR-647 | -0.14 | N/A | Sites in UTR |
| ASCL4    | NM_203436    | achaete-scute complex homolog 4 (Drosophila)                 | 0 | 0 | 0 | 0 | 1 | 0 | 0 | 1 | hsa-miR-647 | -0.14 | N/A | Sites in UTR |
| TXLNB    | NM_153235    | taxilin beta                                                 | 1 | 0 | 0 | 1 | 0 | 0 | 0 | 0 | hsa-miR-647 | -0.14 | N/A | Sites in UTR |
| LFNG     | NM_001040167 | LFNG O-fucosylpeptide 3-beta-N-acetylglucosaminyltransferase | 0 | 0 | 0 | 0 | 1 | 0 | 1 | 0 | hsa-miR-647 | -0.14 | N/A | Sites in UTR |
| SLC38A3  | NM_006841    | solute carrier family 38, member 3                           | 0 | 0 | 0 | 0 | 1 | 0 | 1 | 0 | hsa-miR-647 | -0.14 | N/A | Sites in UTR |
| FTO      | NM_001080432 | fat mass and obesity associated                              | 0 | 0 | 0 | 0 | 1 | 0 | 1 | 0 | hsa-miR-647 | -0.14 | N/A | Sites in UTR |
| C19orf44 | NM_032207    | chromosome 19 open reading frame 44                          | 0 | 0 | 0 | 0 | 1 | 0 | 1 | 0 | hsa-miR-647 | -0.14 | N/A | Sites in UTR |

|          |              |                                                           |   |   |   |   |   |   |   |   |             |       |     |              |
|----------|--------------|-----------------------------------------------------------|---|---|---|---|---|---|---|---|-------------|-------|-----|--------------|
| BBS5     | NM_152384    | Bardet-Biedl syndrome 5                                   | 0 | 0 | 0 | 0 | 3 | 0 | 2 | 1 | hsa-miR-647 | -0.14 | N/A | Sites in UTR |
| GJA5     | NM_005266    | gap junction protein, alpha 5, 40kDa                      | 0 | 0 | 0 | 0 | 1 | 0 | 0 | 1 | hsa-miR-647 | -0.14 | N/A | Sites in UTR |
| GOLGB1   | NM_004487    | golgin B1                                                 | 0 | 0 | 0 | 0 | 1 | 0 | 0 | 1 | hsa-miR-647 | -0.14 | N/A | Sites in UTR |
| CD200    | NM_001004196 | CD200 molecule                                            | 0 | 0 | 0 | 0 | 1 | 0 | 0 | 1 | hsa-miR-647 | -0.14 | N/A | Sites in UTR |
| TNFSF13B | NM_001145645 | tumor necrosis factor (ligand) superfamily, member 13b    | 0 | 0 | 0 | 0 | 1 | 0 | 0 | 1 | hsa-miR-647 | -0.14 | N/A | Sites in UTR |
| MRPL42   | NM_014050    | mitochondrial ribosomal protein L42                       | 0 | 0 | 0 | 0 | 1 | 0 | 0 | 1 | hsa-miR-647 | -0.14 | N/A | Sites in UTR |
| BRK1     | NM_018462    | BRICK1, SCAR/WAVE actin-nucleating complex subunit        | 0 | 0 | 0 | 0 | 1 | 0 | 0 | 1 | hsa-miR-647 | -0.14 | N/A | Sites in UTR |
| UNC45B   | NM_001033576 | unc-45 homolog B (C. elegans)                             | 0 | 0 | 0 | 0 | 1 | 0 | 0 | 1 | hsa-miR-647 | -0.14 | N/A | Sites in UTR |
| SPRY4    | NM_207344    | SPRY domain containing 4                                  | 0 | 0 | 0 | 0 | 1 | 0 | 0 | 1 | hsa-miR-647 | -0.14 | N/A | Sites in UTR |
| C2orf71  | NM_001029883 | chromosome 2 open reading frame 71                        | 0 | 0 | 0 | 0 | 1 | 0 | 0 | 1 | hsa-miR-647 | -0.14 | N/A | Sites in UTR |
| DNASE1L2 | NM_001374    | deoxyribonuclease I-like 2                                | 0 | 0 | 0 | 0 | 1 | 0 | 1 | 0 | hsa-miR-647 | -0.14 | N/A | Sites in UTR |
| DPYSL3   | NM_001197294 | dihydropyrimidinase-like 3                                | 1 | 0 | 1 | 0 | 0 | 0 | 0 | 0 | hsa-miR-647 | -0.14 | N/A | Sites in UTR |
| 9-Sep    | NM_001113491 | septin 9                                                  | 0 | 0 | 0 | 0 | 1 | 0 | 1 | 0 | hsa-miR-647 | -0.14 | N/A | Sites in UTR |
| BET1L    | NM_001098787 | blocked early in transport 1 homolog (S. cerevisiae)-like | 0 | 0 | 0 | 0 | 1 | 0 | 1 | 0 | hsa-miR-647 | -0.14 | N/A | Sites in UTR |
| ENAH     | NM_001008493 | enabled homolog (Drosophila)                              | 0 | 0 | 0 | 0 | 1 | 0 | 1 | 0 | hsa-miR-647 | -0.14 | N/A | Sites in UTR |
| C1orf106 | NM_001142569 | chromosome 1 open reading frame 106                       | 0 | 0 | 0 | 0 | 1 | 0 | 1 | 0 | hsa-miR-647 | -0.14 | N/A | Sites in UTR |
| UBTD1    | NM_024954    | ubiquitin domain containing 1                             | 0 | 0 | 0 | 0 | 1 | 0 | 1 | 0 | hsa-miR-647 | -0.14 | N/A | Sites in UTR |
| ITFG3    | NM_032039    | integrin alpha FG-GAP repeat containing 3                 | 0 | 0 | 0 | 0 | 1 | 0 | 1 | 0 | hsa-miR-647 | -0.14 | N/A | Sites in UTR |

|           |              |                                                                                                |   |   |   |   |   |   |   |   |   |             |       |     |              |
|-----------|--------------|------------------------------------------------------------------------------------------------|---|---|---|---|---|---|---|---|---|-------------|-------|-----|--------------|
| RBM8A     | NM_005105    | RNA binding motif protein 8A                                                                   | 1 | 1 | 0 | 0 | 0 | 0 | 0 | 0 | 0 | hsa-miR-647 | -0.14 | N/A | Sites in UTR |
| TRIM67    | NM_001004342 | tripartite motif containing 67                                                                 | 0 | 0 | 0 | 0 | 2 | 0 | 1 | 1 | 1 | hsa-miR-647 | -0.14 | N/A | Sites in UTR |
| MLLT1     | NM_005934    | myeloid/lymphoid or mixed-lineage leukemia (trithorax homolog, Drosophila); translocated to, 1 | 0 | 0 | 0 | 0 | 2 | 0 | 1 | 1 | 1 | hsa-miR-647 | -0.14 | N/A | Sites in UTR |
| SNPH      | NM_014723    | syntaphilin                                                                                    | 0 | 0 | 0 | 0 | 3 | 0 | 1 | 2 | 2 | hsa-miR-647 | -0.14 | N/A | Sites in UTR |
| CD52      | NM_001803    | CD52 molecule                                                                                  | 0 | 0 | 0 | 0 | 1 | 0 | 0 | 1 | 1 | hsa-miR-647 | -0.14 | N/A | Sites in UTR |
| HNRNPA1   | NM_002136    | heterogeneous nuclear ribonucleoprotein A1                                                     | 1 | 0 | 0 | 1 | 0 | 0 | 0 | 0 | 0 | hsa-miR-647 | -0.14 | N/A | Sites in UTR |
| PDZK1IP1  | NM_005764    | PDZK1 interacting protein 1                                                                    | 0 | 0 | 0 | 0 | 1 | 0 | 0 | 1 | 1 | hsa-miR-647 | -0.14 | N/A | Sites in UTR |
| SLC35D2   | NM_007001    | solute carrier family 35, member D2                                                            | 0 | 0 | 0 | 0 | 1 | 0 | 0 | 1 | 1 | hsa-miR-647 | -0.14 | N/A | Sites in UTR |
| UBR5      | NM_015902    | ubiquitin protein ligase E3 component n-recogin 5                                              | 1 | 0 | 0 | 1 | 0 | 0 | 0 | 0 | 0 | hsa-miR-647 | -0.14 | N/A | Sites in UTR |
| FAM190B   | NM_018999    | family with sequence similarity 190, member B                                                  | 1 | 0 | 0 | 1 | 0 | 0 | 0 | 0 | 0 | hsa-miR-647 | -0.14 | N/A | Sites in UTR |
| AGK       | NM_018238    | acylglycerol kinase                                                                            | 0 | 0 | 0 | 0 | 1 | 0 | 0 | 1 | 1 | hsa-miR-647 | -0.14 | N/A | Sites in UTR |
| HNRNPA1L2 | NM_001011724 | heterogeneous nuclear ribonucleoprotein A1-like 2                                              | 0 | 0 | 0 | 0 | 1 | 0 | 0 | 1 | 1 | hsa-miR-647 | -0.14 | N/A | Sites in UTR |
| AQP11     | NM_173039    | aquaporin 11                                                                                   | 0 | 0 | 0 | 0 | 1 | 0 | 0 | 1 | 1 | hsa-miR-647 | -0.14 | N/A | Sites in UTR |
| MAP3K10   | NM_002446    | mitogen-activated protein kinase kinase kinase 10                                              | 1 | 0 | 1 | 0 | 0 | 0 | 0 | 0 | 0 | hsa-miR-647 | -0.14 | N/A | Sites in UTR |
| HIVEP3    | NM_001127714 | human immunodeficiency virus type I enhancer binding protein 3                                 | 0 | 0 | 0 | 0 | 1 | 0 | 1 | 0 | 0 | hsa-miR-647 | -0.14 | N/A | Sites in UTR |
| TMEM198   | NM_001005209 | transmembrane protein 198                                                                      | 0 | 0 | 0 | 0 | 1 | 0 | 1 | 0 | 0 | hsa-miR-647 | -0.14 | N/A | Sites in UTR |
| CDC42BPA  | NM_003607    | CDC42 binding protein kinase alpha (DMPK-like)                                                 | 0 | 0 | 0 | 0 | 2 | 0 | 0 | 2 | 2 | hsa-miR-647 | -0.14 | N/A | Sites in UTR |
| CDC25C    | NM_001790    | cell division cycle 25 homolog C (S. pombe)                                                    | 0 | 0 | 0 | 0 | 1 | 0 | 0 | 1 | 1 | hsa-miR-647 | -0.14 | N/A | Sites in UTR |

|         |              |                                                                                 |   |   |   |   |   |   |   |   |             |       |     |              |
|---------|--------------|---------------------------------------------------------------------------------|---|---|---|---|---|---|---|---|-------------|-------|-----|--------------|
| DPYS    | NM_001385    | dihydropyrimidinase                                                             | 0 | 0 | 0 | 0 | 1 | 0 | 0 | 1 | hsa-miR-647 | -0.14 | N/A | Sites in UTR |
| MYO10   | NM_012334    | myosin X                                                                        | 0 | 0 | 0 | 0 | 1 | 0 | 0 | 1 | hsa-miR-647 | -0.14 | N/A | Sites in UTR |
| ZNF193  | NM_001199479 | zinc finger protein 193                                                         | 0 | 0 | 0 | 0 | 1 | 0 | 0 | 1 | hsa-miR-647 | -0.14 | N/A | Sites in UTR |
| MRPS2   | NM_016034    | mitochondrial ribosomal protein S2                                              | 0 | 0 | 0 | 0 | 1 | 0 | 0 | 1 | hsa-miR-647 | -0.14 | N/A | Sites in UTR |
| BCL11A  | NM_018014    | B-cell CLL/lymphoma 11A (zinc finger protein)                                   | 0 | 0 | 0 | 0 | 1 | 0 | 0 | 1 | hsa-miR-647 | -0.14 | N/A | Sites in UTR |
| CT62    | NM_001102658 | cancer/testis antigen 62                                                        | 0 | 0 | 0 | 0 | 1 | 0 | 0 | 1 | hsa-miR-647 | -0.14 | N/A | Sites in UTR |
| LARS2   | NM_015340    | leucyl-tRNA synthetase 2, mitochondrial                                         | 0 | 0 | 0 | 0 | 1 | 0 | 1 | 0 | hsa-miR-647 | -0.14 | N/A | Sites in UTR |
| ABTB2   | NM_145804    | ankyrin repeat and BTB (POZ) domain containing 2                                | 0 | 0 | 0 | 0 | 1 | 0 | 1 | 0 | hsa-miR-647 | -0.14 | N/A | Sites in UTR |
| MFSD6   | NM_017694    | major facilitator superfamily domain containing 6                               | 0 | 0 | 0 | 0 | 1 | 0 | 1 | 0 | hsa-miR-647 | -0.14 | N/A | Sites in UTR |
| ZNF395  | NM_018660    | zinc finger protein 395                                                         | 0 | 0 | 0 | 0 | 1 | 0 | 1 | 0 | hsa-miR-647 | -0.14 | N/A | Sites in UTR |
| HAUS3   | NM_024511    | HAUS augmin-like complex, subunit 3                                             | 0 | 0 | 0 | 0 | 1 | 0 | 1 | 0 | hsa-miR-647 | -0.14 | N/A | Sites in UTR |
| PPAPDC3 | NM_032728    | phosphatidic acid phosphatase type 2 domain containing 3                        | 0 | 0 | 0 | 0 | 1 | 0 | 1 | 0 | hsa-miR-647 | -0.14 | N/A | Sites in UTR |
| FIBCD1  | NM_001145106 | fibrinogen C domain containing 1                                                | 0 | 0 | 0 | 0 | 1 | 0 | 1 | 0 | hsa-miR-647 | -0.14 | N/A | Sites in UTR |
| SCRT2   | NM_033129    | scratch homolog 2, zinc finger protein (Drosophila)                             | 0 | 0 | 0 | 0 | 1 | 0 | 1 | 0 | hsa-miR-647 | -0.14 | N/A | Sites in UTR |
| TBC1D20 | NM_144628    | TBC1 domain family, member 20                                                   | 1 | 0 | 1 | 0 | 0 | 0 | 0 | 0 | hsa-miR-647 | -0.14 | N/A | Sites in UTR |
| HOXB13  | NM_006361    | homeobox B13                                                                    | 0 | 0 | 0 | 0 | 1 | 1 | 0 | 0 | hsa-miR-647 | -0.14 | N/A | Sites in UTR |
| ATP5G3  | NM_001002258 | ATP synthase, H+ transporting, mitochondrial Fo complex, subunit C3 (subunit 9) | 0 | 0 | 0 | 0 | 1 | 0 | 0 | 1 | hsa-miR-647 | -0.14 | N/A | Sites in UTR |
| BMP6    | NM_001718    | bone morphogenetic protein 6                                                    | 0 | 0 | 0 | 0 | 1 | 0 | 0 | 1 | hsa-miR-647 | -0.14 | N/A | Sites in UTR |

|         |              |                                                          |   |   |   |   |   |   |   |   |             |       |     |              |
|---------|--------------|----------------------------------------------------------|---|---|---|---|---|---|---|---|-------------|-------|-----|--------------|
| PMP2    | NM_002677    | peripheral myelin protein 2                              | 0 | 0 | 0 | 0 | 1 | 0 | 0 | 1 | hsa-miR-647 | -0.14 | N/A | Sites in UTR |
| RING1   | NM_002931    | ring finger protein 1                                    | 0 | 0 | 0 | 0 | 1 | 0 | 0 | 1 | hsa-miR-647 | -0.14 | N/A | Sites in UTR |
| IDI2    | NM_033261    | isopentenyl-diphosphate delta isomerase 2                | 0 | 0 | 0 | 0 | 1 | 0 | 0 | 1 | hsa-miR-647 | -0.14 | N/A | Sites in UTR |
| ZNF773  | NM_198542    | zinc finger protein 773                                  | 0 | 0 | 0 | 0 | 1 | 0 | 0 | 1 | hsa-miR-647 | -0.14 | N/A | Sites in UTR |
| MIA3    | NM_198551    | melanoma inhibitory activity family, member 3            | 0 | 0 | 0 | 0 | 1 | 0 | 0 | 1 | hsa-miR-647 | -0.14 | N/A | Sites in UTR |
| ZNF43   | NM_003423    | zinc finger protein 43                                   | 0 | 0 | 0 | 0 | 1 | 0 | 1 | 0 | hsa-miR-647 | -0.14 | N/A | Sites in UTR |
| LRRFIP1 | NM_001137550 | leucine rich repeat (in FLII) interacting protein 1      | 0 | 0 | 0 | 0 | 1 | 0 | 1 | 0 | hsa-miR-647 | -0.14 | N/A | Sites in UTR |
| BMS1    | NM_014753    | BMS1 homolog, ribosome assembly protein (yeast)          | 0 | 0 | 0 | 0 | 1 | 0 | 1 | 0 | hsa-miR-647 | -0.14 | N/A | Sites in UTR |
| MZB1    | NM_016459    | marginal zone B and B1 cell-specific protein             | 0 | 0 | 0 | 0 | 1 | 0 | 1 | 0 | hsa-miR-647 | -0.14 | N/A | Sites in UTR |
| EPN3    | NM_017957    | epsin 3                                                  | 0 | 0 | 0 | 0 | 1 | 0 | 1 | 0 | hsa-miR-647 | -0.14 | N/A | Sites in UTR |
| PPP1R3B | NM_001201329 | protein phosphatase 1, regulatory (inhibitor) subunit 3B | 0 | 0 | 0 | 0 | 1 | 0 | 1 | 0 | hsa-miR-647 | -0.14 | N/A | Sites in UTR |
| THAP9   | NM_024672    | THAP domain containing 9                                 | 0 | 0 | 0 | 0 | 1 | 0 | 1 | 0 | hsa-miR-647 | -0.14 | N/A | Sites in UTR |
| CENPP   | NM_001012267 | centromere protein P                                     | 0 | 0 | 0 | 0 | 1 | 0 | 1 | 0 | hsa-miR-647 | -0.14 | N/A | Sites in UTR |
| NUDCD3  | NM_015332    | NudC domain containing 3                                 | 0 | 0 | 0 | 0 | 2 | 0 | 1 | 1 | hsa-miR-647 | -0.14 | N/A | Sites in UTR |
| DMP1    | NM_001079911 | dentin matrix acidic phosphoprotein 1                    | 0 | 0 | 0 | 0 | 1 | 0 | 0 | 1 | hsa-miR-647 | -0.14 | N/A | Sites in UTR |
| INSL3   | NM_005543    | insulin-like 3 (Leydig cell)                             | 0 | 0 | 0 | 0 | 1 | 0 | 0 | 1 | hsa-miR-647 | -0.14 | N/A | Sites in UTR |
| MPI     | NM_002435    | mannose phosphate isomerase                              | 0 | 0 | 0 | 0 | 1 | 0 | 0 | 1 | hsa-miR-647 | -0.14 | N/A | Sites in UTR |
| MAPK9   | NM_002752    | mitogen-activated protein kinase 9                       | 0 | 0 | 0 | 0 | 1 | 0 | 0 | 1 | hsa-miR-647 | -0.14 | N/A | Sites in UTR |

|                 |              |                                                                |   |   |   |   |   |   |   |   |             |       |     |              |
|-----------------|--------------|----------------------------------------------------------------|---|---|---|---|---|---|---|---|-------------|-------|-----|--------------|
| TNFSF13         | NM_001198622 | tumor necrosis factor (ligand) superfamily, member 13          | 0 | 0 | 0 | 0 | 1 | 0 | 0 | 1 | hsa-miR-647 | -0.14 | N/A | Sites in UTR |
| RALBP1          | NM_006788    | ralA binding protein 1                                         | 0 | 0 | 0 | 0 | 1 | 0 | 0 | 1 | hsa-miR-647 | -0.14 | N/A | Sites in UTR |
| SPTBN5          | NM_016642    | spectrin, beta, non-erythrocytic 5                             | 0 | 0 | 0 | 0 | 1 | 0 | 0 | 1 | hsa-miR-647 | -0.14 | N/A | Sites in UTR |
| LYPD6           | NM_001195685 | LY6/PLAUR domain containing 6                                  | 0 | 0 | 0 | 0 | 1 | 0 | 0 | 1 | hsa-miR-647 | -0.14 | N/A | Sites in UTR |
| FAM170B         | NM_001164484 | family with sequence similarity 170, member B                  | 0 | 0 | 0 | 0 | 1 | 0 | 0 | 1 | hsa-miR-647 | -0.14 | N/A | Sites in UTR |
| ACER2           | NM_001010887 | alkaline ceramidase 2                                          | 0 | 0 | 0 | 0 | 1 | 0 | 0 | 1 | hsa-miR-647 | -0.14 | N/A | Sites in UTR |
| TNFSF12-TNFSF13 | NM_172089    | TNFSF12-TNFSF13 readthrough                                    | 0 | 0 | 0 | 0 | 1 | 0 | 0 | 1 | hsa-miR-647 | -0.14 | N/A | Sites in UTR |
| ZDHHC7          | NM_001145548 | zinc finger, DHHC-type containing 7                            | 1 | 0 | 0 | 1 | 1 | 0 | 1 | 0 | hsa-miR-647 | -0.14 | N/A | Sites in UTR |
| H2AFX           | NM_002105    | H2A histone family, member X                                   | 0 | 0 | 0 | 0 | 1 | 0 | 1 | 0 | hsa-miR-647 | -0.14 | N/A | Sites in UTR |
| PAPD5           | NM_001040284 | PAP associated domain containing 5                             | 0 | 0 | 0 | 0 | 1 | 0 | 1 | 0 | hsa-miR-647 | -0.14 | N/A | Sites in UTR |
| ZNF598          | NM_178167    | zinc finger protein 598                                        | 0 | 0 | 0 | 0 | 1 | 0 | 1 | 0 | hsa-miR-647 | -0.14 | N/A | Sites in UTR |
| SPECC1          | NM_001033553 | sperm antigen with calponin homology and coiled-coil domains 1 | 0 | 0 | 0 | 0 | 1 | 0 | 1 | 0 | hsa-miR-647 | -0.14 | N/A | Sites in UTR |
| ZFYVE27         | NM_001002261 | zinc finger, FYVE domain containing 27                         | 0 | 0 | 0 | 0 | 1 | 0 | 1 | 0 | hsa-miR-647 | -0.14 | N/A | Sites in UTR |
| TMEM105         | NM_178520    | transmembrane protein 105                                      | 0 | 0 | 0 | 0 | 1 | 0 | 1 | 0 | hsa-miR-647 | -0.14 | N/A | Sites in UTR |
| FAIM2           | NM_012306    | Fas apoptotic inhibitory molecule 2                            | 0 | 0 | 0 | 0 | 2 | 0 | 2 | 0 | hsa-miR-647 | -0.14 | N/A | Sites in UTR |
| NUDT2           | NM_001161    | nudix (nucleoside diphosphate linked moiety X)-type motif 2    | 0 | 0 | 0 | 0 | 1 | 0 | 0 | 1 | hsa-miR-647 | -0.14 | N/A | Sites in UTR |
| F5              | NM_000130    | coagulation factor V (proaccelerin, labile factor)             | 0 | 0 | 0 | 0 | 1 | 0 | 0 | 1 | hsa-miR-647 | -0.14 | N/A | Sites in UTR |
| MTAP            | NM_002451    | methylthioadenosine phosphorylase                              | 0 | 0 | 0 | 0 | 1 | 0 | 0 | 1 | hsa-miR-647 | -0.14 | N/A | Sites in UTR |



|          |              |                                                                         |   |   |   |   |   |   |   |   |             |       |     |              |
|----------|--------------|-------------------------------------------------------------------------|---|---|---|---|---|---|---|---|-------------|-------|-----|--------------|
| SUPT16H  | NM_007192    | suppressor of Ty 16 homolog (S. cerevisiae)                             | 1 | 0 | 0 | 1 | 0 | 0 | 0 | 0 | hsa-miR-647 | -0.14 | N/A | Sites in UTR |
| PRMT6    | NM_018137    | protein arginine methyltransferase 6                                    | 1 | 0 | 0 | 1 | 0 | 0 | 0 | 0 | hsa-miR-647 | -0.14 | N/A | Sites in UTR |
| SRCRB4D  | NM_080744    | scavenger receptor cysteine rich domain containing, group B (4 domains) | 0 | 0 | 0 | 0 | 1 | 0 | 0 | 1 | hsa-miR-647 | -0.14 | N/A | Sites in UTR |
| NEURL2   | NM_080749    | neuralized homolog 2 (Drosophila)                                       | 0 | 0 | 0 | 0 | 1 | 0 | 0 | 1 | hsa-miR-647 | -0.14 | N/A | Sites in UTR |
| METRNL   | NM_001004431 | meteorin, glial cell differentiation regulator-like                     | 0 | 0 | 0 | 0 | 1 | 0 | 0 | 1 | hsa-miR-647 | -0.14 | N/A | Sites in UTR |
| SHROOM2  | NM_001649    | shroom family member 2                                                  | 0 | 0 | 0 | 0 | 1 | 0 | 1 | 0 | hsa-miR-647 | -0.14 | N/A | Sites in UTR |
| ENTPD3   | NM_001248    | ectonucleoside triphosphate diphosphohydrolase 3                        | 0 | 0 | 0 | 0 | 1 | 0 | 1 | 0 | hsa-miR-647 | -0.14 | N/A | Sites in UTR |
| EPHA8    | NM_020526    | EPH receptor A8                                                         | 0 | 0 | 0 | 0 | 1 | 0 | 1 | 0 | hsa-miR-647 | -0.14 | N/A | Sites in UTR |
| MUC6     | NM_005961    | mucin 6, oligomeric mucus/gel-forming                                   | 0 | 0 | 0 | 0 | 1 | 0 | 1 | 0 | hsa-miR-647 | -0.14 | N/A | Sites in UTR |
| TBC1D25  | NM_002536    | TBC1 domain family, member 25                                           | 0 | 0 | 0 | 0 | 1 | 0 | 1 | 0 | hsa-miR-647 | -0.14 | N/A | Sites in UTR |
| TMOD1    | NM_001166116 | tropomodulin 1                                                          | 0 | 0 | 0 | 0 | 1 | 0 | 1 | 0 | hsa-miR-647 | -0.14 | N/A | Sites in UTR |
| TSPAN5   | NM_005723    | tetraspanin 5                                                           | 0 | 0 | 0 | 0 | 1 | 0 | 1 | 0 | hsa-miR-647 | -0.14 | N/A | Sites in UTR |
| DMRTB1   | NM_033067    | DMRT-like family B with proline-rich C-terminal, 1                      | 0 | 0 | 0 | 0 | 1 | 0 | 1 | 0 | hsa-miR-647 | -0.14 | N/A | Sites in UTR |
| C16orf70 | NM_025187    | chromosome 16 open reading frame 70                                     | 0 | 0 | 0 | 0 | 1 | 0 | 1 | 0 | hsa-miR-647 | -0.14 | N/A | Sites in UTR |
| APOL6    | NM_030641    | apolipoprotein L, 6                                                     | 0 | 0 | 0 | 0 | 1 | 0 | 1 | 0 | hsa-miR-647 | -0.14 | N/A | Sites in UTR |
| RASL10B  | NM_033315    | RAS-like, family 10, member B                                           | 0 | 0 | 0 | 0 | 1 | 0 | 1 | 0 | hsa-miR-647 | -0.14 | N/A | Sites in UTR |
| DEGS2    | NM_206918    | degenerative spermatocyte homolog 2, lipid desaturase (Drosophila)      | 0 | 0 | 0 | 0 | 1 | 0 | 1 | 0 | hsa-miR-647 | -0.14 | N/A | Sites in UTR |
| FAM65C   | NM_080829    | family with sequence similarity 65, member C                            | 0 | 0 | 0 | 0 | 1 | 0 | 1 | 0 | hsa-miR-647 | -0.14 | N/A | Sites in UTR |

|          |              |                                                                    |   |   |   |   |   |   |   |   |             |       |     |              |
|----------|--------------|--------------------------------------------------------------------|---|---|---|---|---|---|---|---|-------------|-------|-----|--------------|
| NFASC    | NM_001005388 | neurofascin                                                        | 0 | 0 | 0 | 0 | 3 | 0 | 1 | 2 | hsa-miR-647 | -0.13 | N/A | Sites in UTR |
| ST3GAL2  | NM_006927    | ST3 beta-galactoside alpha-2,3-sialyltransferase 2                 | 0 | 0 | 0 | 0 | 1 | 0 | 0 | 1 | hsa-miR-647 | -0.13 | N/A | Sites in UTR |
| MPDU1    | NM_004870    | mannose-P-dolichol utilization defect 1                            | 0 | 0 | 0 | 0 | 1 | 0 | 0 | 1 | hsa-miR-647 | -0.13 | N/A | Sites in UTR |
| BRP44    | NM_001143674 | brain protein 44                                                   | 0 | 0 | 0 | 0 | 1 | 0 | 0 | 1 | hsa-miR-647 | -0.13 | N/A | Sites in UTR |
| ZNF285   | NM_152354    | zinc finger protein 285                                            | 0 | 0 | 0 | 0 | 1 | 0 | 0 | 1 | hsa-miR-647 | -0.13 | N/A | Sites in UTR |
| SKA3     | NM_001166017 | spindle and kinetochore associated complex subunit 3               | 0 | 0 | 0 | 0 | 1 | 0 | 0 | 1 | hsa-miR-647 | -0.13 | N/A | Sites in UTR |
| C15orf54 | NM_207445    | chromosome 15 open reading frame 54                                | 0 | 0 | 0 | 0 | 1 | 0 | 0 | 1 | hsa-miR-647 | -0.13 | N/A | Sites in UTR |
| IL6R     | NM_000565    | interleukin 6 receptor                                             | 0 | 0 | 0 | 0 | 2 | 0 | 1 | 1 | hsa-miR-647 | -0.13 | N/A | Sites in UTR |
| PDE2A    | NM_001143839 | phosphodiesterase 2A, cGMP-stimulated                              | 0 | 0 | 0 | 0 | 1 | 0 | 1 | 0 | hsa-miR-647 | -0.13 | N/A | Sites in UTR |
| PET112   | NM_004564    | PET112 homolog (yeast)                                             | 0 | 0 | 0 | 0 | 1 | 0 | 1 | 0 | hsa-miR-647 | -0.13 | N/A | Sites in UTR |
| FKBP6    | NM_001135211 | FK506 binding protein 6, 36kDa                                     | 0 | 0 | 0 | 0 | 1 | 0 | 1 | 0 | hsa-miR-647 | -0.13 | N/A | Sites in UTR |
| VMAC     | NM_001017921 | vimentin-type intermediate filament associated coiled-coil protein | 0 | 0 | 0 | 0 | 1 | 0 | 1 | 0 | hsa-miR-647 | -0.13 | N/A | Sites in UTR |
| SFTPA1   | NM_001093770 | surfactant protein A1                                              | 0 | 0 | 0 | 0 | 1 | 0 | 1 | 0 | hsa-miR-647 | -0.13 | N/A | Sites in UTR |
| PHF2     | NM_005392    | PHD finger protein 2                                               | 0 | 0 | 0 | 0 | 2 | 0 | 0 | 2 | hsa-miR-647 | -0.13 | N/A | Sites in UTR |
| CDK2     | NM_001798    | cyclin-dependent kinase 2                                          | 0 | 0 | 0 | 0 | 1 | 0 | 0 | 1 | hsa-miR-647 | -0.13 | N/A | Sites in UTR |
| MEIS1    | NM_002398    | Meis homeobox 1                                                    | 0 | 0 | 0 | 0 | 1 | 0 | 0 | 1 | hsa-miR-647 | -0.13 | N/A | Sites in UTR |
| BACE2    | NM_012105    | beta-site APP-cleaving enzyme 2                                    | 0 | 0 | 0 | 0 | 1 | 0 | 0 | 1 | hsa-miR-647 | -0.13 | N/A | Sites in UTR |
| ARRDC2   | NM_001025604 | arrestin domain containing 2                                       | 0 | 0 | 0 | 0 | 1 | 0 | 0 | 1 | hsa-miR-647 | -0.13 | N/A | Sites in UTR |

|        |              |                                                                                        |   |   |   |   |   |   |   |   |             |       |     |              |
|--------|--------------|----------------------------------------------------------------------------------------|---|---|---|---|---|---|---|---|-------------|-------|-----|--------------|
| CPPED1 | NM_001099455 | calcineurin-like phosphoesterase domain containing 1                                   | 0 | 0 | 0 | 0 | 1 | 0 | 0 | 1 | hsa-miR-647 | -0.13 | N/A | Sites in UTR |
| MEGF11 | NM_032445    | multiple EGF-like-domains 11                                                           | 0 | 0 | 0 | 0 | 1 | 0 | 0 | 1 | hsa-miR-647 | -0.13 | N/A | Sites in UTR |
| PATE4  | NM_001144874 | prostate and testis expressed 4                                                        | 0 | 0 | 0 | 0 | 1 | 0 | 0 | 1 | hsa-miR-647 | -0.13 | N/A | Sites in UTR |
| FBXO47 | NM_001008777 | F-box protein 47                                                                       | 0 | 0 | 0 | 0 | 1 | 0 | 0 | 1 | hsa-miR-647 | -0.13 | N/A | Sites in UTR |
| PRR9   | NM_001195571 | proline rich 9                                                                         | 0 | 0 | 0 | 0 | 1 | 0 | 0 | 1 | hsa-miR-647 | -0.13 | N/A | Sites in UTR |
| RABIF  | NM_002871    | RAB interacting factor                                                                 | 0 | 0 | 0 | 0 | 1 | 0 | 1 | 0 | hsa-miR-647 | -0.13 | N/A | Sites in UTR |
| SPTB   | NM_000347    | spectrin, beta, erythrocytic                                                           | 0 | 0 | 0 | 0 | 1 | 0 | 1 | 0 | hsa-miR-647 | -0.13 | N/A | Sites in UTR |
| TAB1   | NM_006116    | TGF-beta activated kinase 1/MAP3K7 binding protein 1                                   | 0 | 0 | 0 | 0 | 1 | 0 | 1 | 0 | hsa-miR-647 | -0.13 | N/A | Sites in UTR |
| SUN2   | NM_001199579 | Sad1 and UNC84 domain containing 2                                                     | 0 | 0 | 0 | 0 | 1 | 0 | 1 | 0 | hsa-miR-647 | -0.13 | N/A | Sites in UTR |
| SEMA3G | NM_020163    | sema domain, immunoglobulin domain (Ig), short basic domain, secreted, (semaphorin) 3G | 0 | 0 | 0 | 0 | 1 | 0 | 1 | 0 | hsa-miR-647 | -0.13 | N/A | Sites in UTR |
| CACNG7 | NM_031896    | calcium channel, voltage-dependent, gamma subunit 7                                    | 0 | 0 | 0 | 0 | 1 | 0 | 1 | 0 | hsa-miR-647 | -0.13 | N/A | Sites in UTR |
| ATHL1  | NM_025092    | ATH1, acid trehalase-like 1 (yeast)                                                    | 0 | 0 | 0 | 0 | 1 | 0 | 1 | 0 | hsa-miR-647 | -0.13 | N/A | Sites in UTR |
| TRPM6  | NM_001177310 | transient receptor potential cation channel, subfamily M, member 6                     | 0 | 0 | 0 | 0 | 1 | 0 | 1 | 0 | hsa-miR-647 | -0.13 | N/A | Sites in UTR |
| NRBP2  | NM_178564    | nuclear receptor binding protein 2                                                     | 0 | 0 | 0 | 0 | 1 | 0 | 1 | 0 | hsa-miR-647 | -0.13 | N/A | Sites in UTR |
| TRIM62 | NM_018207    | tripartite motif containing 62                                                         | 0 | 0 | 0 | 0 | 2 | 0 | 0 | 2 | hsa-miR-647 | -0.13 | N/A | Sites in UTR |
| MED22  | NM_181491    | mediator complex subunit 22                                                            | 0 | 0 | 0 | 0 | 2 | 0 | 1 | 1 | hsa-miR-647 | -0.13 | N/A | Sites in UTR |
| DIEXF  | NM_014388    | digestive organ expansion factor homolog (zebrafish)                                   | 1 | 0 | 0 | 1 | 1 | 0 | 0 | 1 | hsa-miR-647 | -0.13 | N/A | Sites in UTR |
| HOXC9  | NM_006897    | homeobox C9                                                                            | 0 | 0 | 0 | 0 | 1 | 0 | 0 | 1 | hsa-miR-647 | -0.13 | N/A | Sites in UTR |

|          |              |                                                                                         |   |   |   |   |   |   |   |   |             |       |     |              |
|----------|--------------|-----------------------------------------------------------------------------------------|---|---|---|---|---|---|---|---|-------------|-------|-----|--------------|
| PKIA     | NM_006823    | protein kinase (cAMP-dependent, catalytic) inhibitor alpha                              | 0 | 0 | 0 | 0 | 1 | 0 | 0 | 1 | hsa-miR-647 | -0.13 | N/A | Sites in UTR |
| RAC2     | NM_002872    | ras-related C3 botulinum toxin substrate 2 (rho family, small GTP binding protein Rac2) | 0 | 0 | 0 | 0 | 1 | 0 | 0 | 1 | hsa-miR-647 | -0.13 | N/A | Sites in UTR |
| TRIM26   | NM_001242783 | tripartite motif containing 26                                                          | 0 | 0 | 0 | 0 | 1 | 0 | 0 | 1 | hsa-miR-647 | -0.13 | N/A | Sites in UTR |
| SOX13    | NM_005686    | SRY (sex determining region Y)-box 13                                                   | 0 | 0 | 0 | 0 | 1 | 0 | 0 | 1 | hsa-miR-647 | -0.13 | N/A | Sites in UTR |
| CDK20    | NM_001039803 | cyclin-dependent kinase 20                                                              | 0 | 0 | 0 | 0 | 1 | 0 | 0 | 1 | hsa-miR-647 | -0.13 | N/A | Sites in UTR |
| MTUS1    | NM_001001924 | microtubule associated tumor suppressor 1                                               | 0 | 0 | 0 | 0 | 1 | 0 | 0 | 1 | hsa-miR-647 | -0.13 | N/A | Sites in UTR |
| EPS8L2   | NM_022772    | EPS8-like 2                                                                             | 1 | 0 | 0 | 1 | 0 | 0 | 0 | 0 | hsa-miR-647 | -0.13 | N/A | Sites in UTR |
| CCNL2    | NM_001039577 | cyclin L2                                                                               | 0 | 0 | 0 | 0 | 1 | 0 | 0 | 1 | hsa-miR-647 | -0.13 | N/A | Sites in UTR |
| CACNB3   | NM_000725    | calcium channel, voltage-dependent, beta 3 subunit                                      | 0 | 0 | 0 | 0 | 1 | 0 | 1 | 0 | hsa-miR-647 | -0.13 | N/A | Sites in UTR |
| VIPR1    | NM_004624    | vasoactive intestinal peptide receptor 1                                                | 0 | 0 | 0 | 0 | 1 | 0 | 1 | 0 | hsa-miR-647 | -0.13 | N/A | Sites in UTR |
| PHLPP2   | NM_015020    | PH domain and leucine rich repeat protein phosphatase 2                                 | 0 | 0 | 0 | 0 | 1 | 0 | 1 | 0 | hsa-miR-647 | -0.13 | N/A | Sites in UTR |
| HEATR2   | NM_017802    | HEAT repeat containing 2                                                                | 0 | 0 | 0 | 0 | 1 | 0 | 1 | 0 | hsa-miR-647 | -0.13 | N/A | Sites in UTR |
| KPNA4    | NM_002268    | karyopherin alpha 4 (importin alpha 3)                                                  | 1 | 0 | 1 | 0 | 1 | 0 | 0 | 1 | hsa-miR-647 | -0.13 | N/A | Sites in UTR |
| PARP14   | NM_017554    | poly (ADP-ribose) polymerase family, member 14                                          | 0 | 0 | 0 | 0 | 2 | 0 | 1 | 1 | hsa-miR-647 | -0.13 | N/A | Sites in UTR |
| DERL3    | NM_001002862 | Der1-like domain family, member 3                                                       | 0 | 0 | 0 | 0 | 1 | 1 | 0 | 0 | hsa-miR-647 | -0.13 | N/A | Sites in UTR |
| C11orf41 | NM_012194    | chromosome 11 open reading frame 41                                                     | 0 | 0 | 0 | 0 | 2 | 0 | 1 | 1 | hsa-miR-647 | -0.13 | N/A | Sites in UTR |
| IQSEC3   | NM_001170738 | IQ motif and Sec7 domain 3                                                              | 0 | 0 | 0 | 0 | 2 | 1 | 1 | 0 | hsa-miR-647 | -0.13 | N/A | Sites in UTR |
| ARF4     | NM_001660    | ADP-ribosylation factor 4                                                               | 0 | 0 | 0 | 0 | 1 | 0 | 0 | 1 | hsa-miR-647 | -0.13 | N/A | Sites in UTR |

|          |              |                                                         |   |   |   |   |   |   |   |   |             |       |     |              |
|----------|--------------|---------------------------------------------------------|---|---|---|---|---|---|---|---|-------------|-------|-----|--------------|
| NCAM1    | NM_000615    | neural cell adhesion molecule 1                         | 0 | 0 | 0 | 0 | 1 | 0 | 0 | 1 | hsa-miR-647 | -0.13 | N/A | Sites in UTR |
| PCDH7    | NM_002589    | protocadherin 7                                         | 0 | 0 | 0 | 0 | 1 | 0 | 0 | 1 | hsa-miR-647 | -0.13 | N/A | Sites in UTR |
| TATDN2   | NM_014760    | TatD DNase domain containing 2                          | 0 | 0 | 0 | 0 | 1 | 0 | 0 | 1 | hsa-miR-647 | -0.13 | N/A | Sites in UTR |
| ZEB2     | NM_001171653 | zinc finger E-box binding homeobox 2                    | 0 | 0 | 0 | 0 | 1 | 0 | 0 | 1 | hsa-miR-647 | -0.13 | N/A | Sites in UTR |
| PHIP     | NM_017934    | pleckstrin homology domain interacting protein          | 0 | 0 | 0 | 0 | 1 | 0 | 0 | 1 | hsa-miR-647 | -0.13 | N/A | Sites in UTR |
| ATPAF1   | NM_001042546 | ATP synthase mitochondrial F1 complex assembly factor 1 | 0 | 0 | 0 | 0 | 1 | 0 | 0 | 1 | hsa-miR-647 | -0.13 | N/A | Sites in UTR |
| CCDC115  | NM_032357    | coiled-coil domain containing 115                       | 0 | 0 | 0 | 0 | 1 | 0 | 0 | 1 | hsa-miR-647 | -0.13 | N/A | Sites in UTR |
| CAPN6    | NM_014289    | calpain 6                                               | 0 | 0 | 0 | 0 | 1 | 0 | 1 | 0 | hsa-miR-647 | -0.13 | N/A | Sites in UTR |
| PTK2B    | NM_004103    | PTK2B protein tyrosine kinase 2 beta                    | 0 | 0 | 0 | 0 | 1 | 0 | 1 | 0 | hsa-miR-647 | -0.13 | N/A | Sites in UTR |
| C4orf36  | NM_144645    | chromosome 4 open reading frame 36                      | 0 | 0 | 0 | 0 | 1 | 0 | 1 | 0 | hsa-miR-647 | -0.13 | N/A | Sites in UTR |
| C15orf52 | NM_207380    | chromosome 15 open reading frame 52                     | 0 | 0 | 0 | 0 | 1 | 0 | 1 | 0 | hsa-miR-647 | -0.13 | N/A | Sites in UTR |
| CX3CL1   | NM_002996    | chemokine (C-X3-C motif) ligand 1                       | 0 | 0 | 0 | 0 | 2 | 0 | 2 | 0 | hsa-miR-647 | -0.13 | N/A | Sites in UTR |
| ACADSB   | NM_001609    | acyl-CoA dehydrogenase, short/branched chain            | 0 | 0 | 0 | 0 | 2 | 0 | 0 | 2 | hsa-miR-647 | -0.13 | N/A | Sites in UTR |
| COL17A1  | NM_000494    | collagen, type XVII, alpha 1                            | 0 | 0 | 0 | 0 | 1 | 0 | 0 | 1 | hsa-miR-647 | -0.13 | N/A | Sites in UTR |
| EFNB3    | NM_001406    | ephrin-B3                                               | 1 | 0 | 0 | 1 | 0 | 0 | 0 | 0 | hsa-miR-647 | -0.13 | N/A | Sites in UTR |
| P2RX7    | NM_002562    | purinergic receptor P2X, ligand-gated ion channel, 7    | 0 | 0 | 0 | 0 | 1 | 0 | 0 | 1 | hsa-miR-647 | -0.13 | N/A | Sites in UTR |
| VEGFB    | NM_003377    | vascular endothelial growth factor B                    | 0 | 0 | 0 | 0 | 1 | 0 | 0 | 1 | hsa-miR-647 | -0.13 | N/A | Sites in UTR |
| LAPTM5   | NM_006762    | lysosomal protein transmembrane 5                       | 0 | 0 | 0 | 0 | 1 | 0 | 0 | 1 | hsa-miR-647 | -0.13 | N/A | Sites in UTR |

|         |              |                                                                                                  |   |   |   |   |   |   |   |   |             |       |     |              |
|---------|--------------|--------------------------------------------------------------------------------------------------|---|---|---|---|---|---|---|---|-------------|-------|-----|--------------|
| WTAP    | NM_152857    | Wilms tumor 1 associated protein                                                                 | 0 | 0 | 0 | 0 | 1 | 0 | 0 | 1 | hsa-miR-647 | -0.13 | N/A | Sites in UTR |
| MRPL11  | NM_016050    | mitochondrial ribosomal protein L11                                                              | 0 | 0 | 0 | 0 | 1 | 0 | 0 | 1 | hsa-miR-647 | -0.13 | N/A | Sites in UTR |
| GALNT12 | NM_024642    | UDP-N-acetyl-alpha-D-galactosamine:polypeptide N-acetylgalactosaminyltransferase 12 (GalNAc-T12) | 0 | 0 | 0 | 0 | 1 | 0 | 0 | 1 | hsa-miR-647 | -0.13 | N/A | Sites in UTR |
| HPS3    | NM_032383    | Hermansky-Pudlak syndrome 3                                                                      | 0 | 0 | 0 | 0 | 1 | 0 | 0 | 1 | hsa-miR-647 | -0.13 | N/A | Sites in UTR |
| EGR3    | NM_001199880 | early growth response 3                                                                          | 0 | 0 | 0 | 0 | 1 | 0 | 1 | 0 | hsa-miR-647 | -0.13 | N/A | Sites in UTR |
| PTP4A1  | NM_003463    | protein tyrosine phosphatase type IVA, member 1                                                  | 0 | 0 | 0 | 0 | 1 | 0 | 1 | 0 | hsa-miR-647 | -0.13 | N/A | Sites in UTR |
| UBL4A   | NM_014235    | ubiquitin-like 4A                                                                                | 0 | 0 | 0 | 0 | 1 | 0 | 1 | 0 | hsa-miR-647 | -0.13 | N/A | Sites in UTR |
| TMEM87A | NM_001110503 | transmembrane protein 87A                                                                        | 0 | 0 | 0 | 0 | 1 | 0 | 1 | 0 | hsa-miR-647 | -0.13 | N/A | Sites in UTR |
| MOV10L1 | NM_001164104 | Mov10l1, Moloney leukemia virus 10-like 1, homolog (mouse)                                       | 0 | 0 | 0 | 0 | 1 | 0 | 1 | 0 | hsa-miR-647 | -0.13 | N/A | Sites in UTR |
| 11-Sep  | NM_018243    | septin 11                                                                                        | 1 | 1 | 0 | 0 | 0 | 0 | 0 | 0 | hsa-miR-647 | -0.13 | N/A | Sites in UTR |
| PIRT    | NM_001101387 | phosphoinositide-interacting regulator of transient receptor potential channels                  | 0 | 0 | 0 | 0 | 1 | 1 | 0 | 0 | hsa-miR-647 | -0.13 | N/A | Sites in UTR |
| WDR20   | NM_001242414 | WD repeat domain 20                                                                              | 0 | 0 | 0 | 0 | 1 | 0 | 0 | 1 | hsa-miR-647 | -0.13 | N/A | Sites in UTR |
| S100Z   | NM_130772    | S100 calcium binding protein Z                                                                   | 0 | 0 | 0 | 0 | 1 | 0 | 0 | 1 | hsa-miR-647 | -0.13 | N/A | Sites in UTR |
| METTL15 | NM_001113528 | methyltransferase like 15                                                                        | 0 | 0 | 0 | 0 | 1 | 0 | 0 | 1 | hsa-miR-647 | -0.13 | N/A | Sites in UTR |
| PCGF3   | NM_006315    | polycomb group ring finger 3                                                                     | 0 | 0 | 0 | 0 | 1 | 0 | 1 | 0 | hsa-miR-647 | -0.13 | N/A | Sites in UTR |
| MLLT6   | NM_005937    | myeloid/lymphoid or mixed-lineage leukemia (trithorax homolog, Drosophila); translocated to, 6   | 0 | 0 | 0 | 0 | 1 | 1 | 0 | 0 | hsa-miR-647 | -0.13 | N/A | Sites in UTR |
| PIN4    | NM_001170747 | protein (peptidylprolyl cis/trans isomerase) NIMA-interacting, 4 (parvulin)                      | 0 | 0 | 0 | 0 | 1 | 0 | 0 | 1 | hsa-miR-647 | -0.13 | N/A | Sites in UTR |
| GPANK1  | NM_001199237 | G patch domain and ankyrin repeats 1                                                             | 0 | 0 | 0 | 0 | 1 | 0 | 0 | 1 | hsa-miR-647 | -0.13 | N/A | Sites in UTR |

|          |              |                                                                           |   |   |   |   |   |   |   |   |             |       |     |              |
|----------|--------------|---------------------------------------------------------------------------|---|---|---|---|---|---|---|---|-------------|-------|-----|--------------|
| RNLS     | NM_018363    | renalase, FAD-dependent amine oxidase                                     | 0 | 0 | 0 | 0 | 1 | 0 | 0 | 1 | hsa-miR-647 | -0.13 | N/A | Sites in UTR |
| KIAA1377 | NM_020802    | KIAA1377                                                                  | 0 | 0 | 0 | 0 | 1 | 0 | 0 | 1 | hsa-miR-647 | -0.13 | N/A | Sites in UTR |
| ERAP2    | NM_001130140 | endoplasmic reticulum aminopeptidase 2                                    | 0 | 0 | 0 | 0 | 1 | 0 | 0 | 1 | hsa-miR-647 | -0.13 | N/A | Sites in UTR |
| CD300LB  | NM_174892    | CD300 molecule-like family member b                                       | 0 | 0 | 0 | 0 | 1 | 0 | 0 | 1 | hsa-miR-647 | -0.13 | N/A | Sites in UTR |
| FAM161B  | NM_152445    | family with sequence similarity 161, member B                             | 0 | 0 | 0 | 0 | 1 | 0 | 0 | 1 | hsa-miR-647 | -0.13 | N/A | Sites in UTR |
| COL6A1   | NM_001848    | collagen, type VI, alpha 1                                                | 0 | 0 | 0 | 0 | 1 | 0 | 1 | 0 | hsa-miR-647 | -0.13 | N/A | Sites in UTR |
| OS9      | NM_001017956 | osteosarcoma amplified 9, endoplasmic reticulum lectin                    | 0 | 0 | 0 | 0 | 1 | 0 | 1 | 0 | hsa-miR-647 | -0.13 | N/A | Sites in UTR |
| TMEM104  | NM_017728    | transmembrane protein 104                                                 | 0 | 0 | 0 | 0 | 1 | 0 | 1 | 0 | hsa-miR-647 | -0.13 | N/A | Sites in UTR |
| RGPD1    | NM_001024457 | RANBP2-like and GRIP domain containing 1                                  | 0 | 0 | 0 | 0 | 1 | 0 | 1 | 0 | hsa-miR-647 | -0.13 | N/A | Sites in UTR |
| SDC3     | NM_014654    | syndecan 3                                                                | 0 | 0 | 0 | 0 | 2 | 0 | 1 | 1 | hsa-miR-647 | -0.13 | N/A | Sites in UTR |
| DAO      | NM_001917    | D-amino-acid oxidase                                                      | 0 | 0 | 0 | 0 | 1 | 0 | 0 | 1 | hsa-miR-647 | -0.13 | N/A | Sites in UTR |
| NRP1     | NM_003873    | neuropilin 1                                                              | 0 | 0 | 0 | 0 | 1 | 0 | 0 | 1 | hsa-miR-647 | -0.13 | N/A | Sites in UTR |
| SYNJ1    | NM_001160302 | synaptojanin 1                                                            | 0 | 0 | 0 | 0 | 1 | 0 | 0 | 1 | hsa-miR-647 | -0.13 | N/A | Sites in UTR |
| CIAPIN1  | NM_020313    | cytokine induced apoptosis inhibitor 1                                    | 0 | 0 | 0 | 0 | 1 | 0 | 0 | 1 | hsa-miR-647 | -0.13 | N/A | Sites in UTR |
| SLC38A10 | NM_001037984 | solute carrier family 38, member 10                                       | 0 | 0 | 0 | 0 | 1 | 0 | 0 | 1 | hsa-miR-647 | -0.13 | N/A | Sites in UTR |
| TIFAB    | NM_001099221 | TRAF-interacting protein with forkhead-associated domain, family member B | 0 | 0 | 0 | 0 | 1 | 0 | 0 | 1 | hsa-miR-647 | -0.13 | N/A | Sites in UTR |
| ZSCAN30  | NM_001112734 | zinc finger and SCAN domain containing 30                                 | 0 | 0 | 0 | 0 | 1 | 0 | 0 | 1 | hsa-miR-647 | -0.13 | N/A | Sites in UTR |
| MCF2L    | NM_001112732 | MCF.2 cell line derived transforming sequence-like                        | 0 | 0 | 0 | 0 | 1 | 0 | 1 | 0 | hsa-miR-647 | -0.13 | N/A | Sites in UTR |

|          |              |                                                                        |   |   |   |   |   |   |   |   |             |       |     |              |
|----------|--------------|------------------------------------------------------------------------|---|---|---|---|---|---|---|---|-------------|-------|-----|--------------|
| CHST15   | NM_014863    | carbohydrate (N-acetylgalactosamine 4-sulfate 6-O) sulfotransferase 15 | 0 | 0 | 0 | 0 | 1 | 0 | 1 | 0 | hsa-miR-647 | -0.13 | N/A | Sites in UTR |
| RCC2     | NM_001136204 | regulator of chromosome condensation 2                                 | 0 | 0 | 0 | 0 | 1 | 0 | 1 | 0 | hsa-miR-647 | -0.13 | N/A | Sites in UTR |
| PAQR4    | NM_152341    | progesterone and adiponectin receptor family member IV                 | 0 | 0 | 0 | 0 | 1 | 0 | 1 | 0 | hsa-miR-647 | -0.13 | N/A | Sites in UTR |
| TMEM132E | NM_207313    | transmembrane protein 132E                                             | 0 | 0 | 0 | 0 | 1 | 0 | 1 | 0 | hsa-miR-647 | -0.13 | N/A | Sites in UTR |
| ZNF280B  | NM_080764    | zinc finger protein 280B                                               | 0 | 0 | 0 | 0 | 1 | 0 | 1 | 0 | hsa-miR-647 | -0.13 | N/A | Sites in UTR |
| DIRAS1   | NM_145173    | DIRAS family, GTP-binding RAS-like 1                                   | 0 | 0 | 0 | 0 | 1 | 0 | 1 | 0 | hsa-miR-647 | -0.13 | N/A | Sites in UTR |
| RASGEF1C | NM_175062    | RasGEF domain family, member 1C                                        | 0 | 0 | 0 | 0 | 1 | 0 | 1 | 0 | hsa-miR-647 | -0.13 | N/A | Sites in UTR |
| ZFP106   | NM_022473    | zinc finger protein 106 homolog (mouse)                                | 0 | 0 | 0 | 0 | 2 | 0 | 1 | 1 | hsa-miR-647 | -0.13 | N/A | Sites in UTR |
| ACVRL1   | NM_000020    | activin A receptor type II-like 1                                      | 1 | 0 | 0 | 1 | 0 | 0 | 0 | 0 | hsa-miR-647 | -0.13 | N/A | Sites in UTR |
| INSR     | NM_000208    | insulin receptor                                                       | 0 | 0 | 0 | 0 | 1 | 0 | 0 | 1 | hsa-miR-647 | -0.13 | N/A | Sites in UTR |
| RBBP9    | NM_006606    | retinoblastoma binding protein 9                                       | 0 | 0 | 0 | 0 | 1 | 0 | 0 | 1 | hsa-miR-647 | -0.13 | N/A | Sites in UTR |
| CLDN19   | NM_001123395 | claudin 19                                                             | 0 | 0 | 0 | 0 | 1 | 0 | 0 | 1 | hsa-miR-647 | -0.13 | N/A | Sites in UTR |
| PPM1L    | NM_139245    | protein phosphatase, Mg2+/Mn2+ dependent, 1L                           | 0 | 0 | 0 | 0 | 1 | 0 | 0 | 1 | hsa-miR-647 | -0.13 | N/A | Sites in UTR |
| ARF3     | NM_001659    | ADP-ribosylation factor 3                                              | 0 | 0 | 0 | 0 | 1 | 0 | 1 | 0 | hsa-miR-647 | -0.13 | N/A | Sites in UTR |
| CISH     | NM_013324    | cytokine inducible SH2-containing protein                              | 0 | 0 | 0 | 0 | 1 | 0 | 1 | 0 | hsa-miR-647 | -0.13 | N/A | Sites in UTR |
| COL6A2   | NM_001849    | collagen, type VI, alpha 2                                             | 0 | 0 | 0 | 0 | 1 | 0 | 1 | 0 | hsa-miR-647 | -0.13 | N/A | Sites in UTR |
| MBP      | NM_001025100 | myelin basic protein                                                   | 0 | 0 | 0 | 0 | 1 | 0 | 1 | 0 | hsa-miR-647 | -0.13 | N/A | Sites in UTR |
| SIK2     | NM_015191    | salt-inducible kinase 2                                                | 0 | 0 | 0 | 0 | 1 | 0 | 1 | 0 | hsa-miR-647 | -0.13 | N/A | Sites in UTR |



|              |              |                                                                   |   |   |   |   |   |   |   |   |             |       |     |              |
|--------------|--------------|-------------------------------------------------------------------|---|---|---|---|---|---|---|---|-------------|-------|-----|--------------|
| TMEM140      | NM_018295    | transmembrane protein 140                                         | 0 | 0 | 0 | 0 | 1 | 0 | 1 | 0 | hsa-miR-647 | -0.13 | N/A | Sites in UTR |
| LYNX1        | NM_023946    | Ly6/neurotoxin 1                                                  | 0 | 0 | 0 | 0 | 1 | 0 | 1 | 0 | hsa-miR-647 | -0.13 | N/A | Sites in UTR |
| QSER1        | NM_001076786 | glutamine and serine rich 1                                       | 1 | 0 | 1 | 0 | 0 | 0 | 0 | 0 | hsa-miR-647 | -0.13 | N/A | Sites in UTR |
| KIFC2        | NM_145754    | kinesin family member C2                                          | 0 | 0 | 0 | 0 | 1 | 0 | 1 | 0 | hsa-miR-647 | -0.13 | N/A | Sites in UTR |
| WNT5A        | NM_003392    | wingless-type MMTV integration site family, member 5A             | 0 | 0 | 0 | 0 | 2 | 0 | 1 | 1 | hsa-miR-647 | -0.13 | N/A | Sites in UTR |
| RLIM         | NM_016120    | ring finger protein, LIM domain interacting                       | 0 | 0 | 0 | 0 | 2 | 0 | 1 | 1 | hsa-miR-647 | -0.13 | N/A | Sites in UTR |
| C20orf203    | NM_182584    | chromosome 20 open reading frame 203                              | 0 | 0 | 0 | 0 | 2 | 0 | 1 | 1 | hsa-miR-647 | -0.13 | N/A | Sites in UTR |
| FAM22G       | NM_001045477 | family with sequence similarity 22, member G                      | 0 | 0 | 0 | 0 | 2 | 0 | 1 | 1 | hsa-miR-647 | -0.13 | N/A | Sites in UTR |
| PKD2         | NM_000297    | polycystic kidney disease 2 (autosomal dominant)                  | 0 | 0 | 0 | 0 | 1 | 0 | 0 | 1 | hsa-miR-647 | -0.12 | N/A | Sites in UTR |
| PLA2G4C      | NM_001159322 | phospholipase A2, group IVC (cytosolic, calcium-independent)      | 0 | 0 | 0 | 0 | 1 | 0 | 0 | 1 | hsa-miR-647 | -0.12 | N/A | Sites in UTR |
| SEZ6L        | NM_001184773 | seizure related 6 homolog (mouse)-like                            | 0 | 0 | 0 | 0 | 1 | 0 | 0 | 1 | hsa-miR-647 | -0.12 | N/A | Sites in UTR |
| ABHD14B      | NM_001146314 | abhydrolase domain containing 14B                                 | 0 | 0 | 0 | 0 | 1 | 0 | 0 | 1 | hsa-miR-647 | -0.12 | N/A | Sites in UTR |
| TARP         | NM_001003799 | TCR gamma alternate reading frame protein                         | 0 | 0 | 0 | 0 | 1 | 0 | 0 | 1 | hsa-miR-647 | -0.12 | N/A | Sites in UTR |
| LOC100130451 | NM_001242575 | hypothetical protein LOC100130451                                 | 0 | 0 | 0 | 0 | 1 | 0 | 0 | 1 | hsa-miR-647 | -0.12 | N/A | Sites in UTR |
| PCYT2        | NM_001184917 | phosphate cytidyltransferase 2, ethanolamine                      | 0 | 0 | 0 | 0 | 1 | 0 | 1 | 0 | hsa-miR-647 | -0.12 | N/A | Sites in UTR |
| RET          | NM_020630    | ret proto-oncogene                                                | 0 | 0 | 0 | 0 | 1 | 0 | 1 | 0 | hsa-miR-647 | -0.12 | N/A | Sites in UTR |
| TFAP4        | NM_003223    | transcription factor AP-4 (activating enhancer binding protein 4) | 0 | 0 | 0 | 0 | 1 | 0 | 1 | 0 | hsa-miR-647 | -0.12 | N/A | Sites in UTR |
| NUP62        | NM_001193357 | nucleoporin 62kDa                                                 | 0 | 0 | 0 | 0 | 1 | 0 | 1 | 0 | hsa-miR-647 | -0.12 | N/A | Sites in UTR |

|          |              |                                                                               |   |   |   |   |   |   |   |   |             |       |     |              |
|----------|--------------|-------------------------------------------------------------------------------|---|---|---|---|---|---|---|---|-------------|-------|-----|--------------|
| PTCHD2   | NM_020780    | patched domain containing 2                                                   | 0 | 0 | 0 | 0 | 1 | 0 | 1 | 0 | hsa-miR-647 | -0.12 | N/A | Sites in UTR |
| C16orf53 | NM_024516    | chromosome 16 open reading frame 53                                           | 0 | 0 | 0 | 0 | 1 | 0 | 1 | 0 | hsa-miR-647 | -0.12 | N/A | Sites in UTR |
| NAGS     | NM_153006    | N-acetylglutamate synthase                                                    | 0 | 0 | 0 | 0 | 1 | 0 | 1 | 0 | hsa-miR-647 | -0.12 | N/A | Sites in UTR |
| ACSF3    | NM_001127214 | acyl-CoA synthetase family member 3                                           | 0 | 0 | 0 | 0 | 1 | 0 | 1 | 0 | hsa-miR-647 | -0.12 | N/A | Sites in UTR |
| SLC1A2   | NM_001195728 | solute carrier family 1 (glial high affinity glutamate transporter), member 2 | 0 | 0 | 0 | 0 | 1 | 1 | 0 | 0 | hsa-miR-647 | -0.12 | N/A | Sites in UTR |
| NR4A3    | NM_006981    | nuclear receptor subfamily 4, group A, member 3                               | 0 | 0 | 0 | 0 | 1 | 0 | 0 | 1 | hsa-miR-647 | -0.12 | N/A | Sites in UTR |
| EIF1     | NM_005801    | eukaryotic translation initiation factor 1                                    | 0 | 0 | 0 | 0 | 1 | 0 | 0 | 1 | hsa-miR-647 | -0.12 | N/A | Sites in UTR |
| RAMP1    | NM_005855    | receptor (G protein-coupled) activity modifying protein 1                     | 0 | 0 | 0 | 0 | 1 | 0 | 0 | 1 | hsa-miR-647 | -0.12 | N/A | Sites in UTR |
| SLC2A8   | NM_014580    | solute carrier family 2 (facilitated glucose transporter), member 8           | 0 | 0 | 0 | 0 | 1 | 0 | 0 | 1 | hsa-miR-647 | -0.12 | N/A | Sites in UTR |
| CEACAM19 | NM_001127893 | carcinoembryonic antigen-related cell adhesion molecule 19                    | 0 | 0 | 0 | 0 | 1 | 0 | 0 | 1 | hsa-miR-647 | -0.12 | N/A | Sites in UTR |
| ANKRD50  | NM_001167882 | ankyrin repeat domain 50                                                      | 0 | 0 | 0 | 0 | 1 | 0 | 0 | 1 | hsa-miR-647 | -0.12 | N/A | Sites in UTR |
| ZSWIM5   | NM_020883    | zinc finger, SWIM-type containing 5                                           | 0 | 0 | 0 | 0 | 1 | 0 | 0 | 1 | hsa-miR-647 | -0.12 | N/A | Sites in UTR |
| TMUB2    | NM_001076674 | transmembrane and ubiquitin-like domain containing 2                          | 0 | 0 | 0 | 0 | 1 | 0 | 0 | 1 | hsa-miR-647 | -0.12 | N/A | Sites in UTR |
| SLC13A5  | NM_001143838 | solute carrier family 13 (sodium-dependent citrate transporter), member 5     | 0 | 0 | 0 | 0 | 1 | 0 | 0 | 1 | hsa-miR-647 | -0.12 | N/A | Sites in UTR |
| INPP5D   | NM_001017915 | inositol polyphosphate-5-phosphatase, 145kDa                                  | 0 | 0 | 0 | 0 | 1 | 0 | 1 | 0 | hsa-miR-647 | -0.12 | N/A | Sites in UTR |
| BARX2    | NM_003658    | BARX homeobox 2                                                               | 0 | 0 | 0 | 0 | 1 | 0 | 1 | 0 | hsa-miR-647 | -0.12 | N/A | Sites in UTR |
| CAPN12   | NM_144691    | calpain 12                                                                    | 1 | 0 | 1 | 0 | 0 | 0 | 0 | 0 | hsa-miR-647 | -0.12 | N/A | Sites in UTR |
| PLCXD1   | NM_018390    | phosphatidylinositol-specific phospholipase C, X domain containing 1          | 0 | 0 | 0 | 0 | 2 | 0 | 0 | 2 | hsa-miR-647 | -0.12 | N/A | Sites in UTR |

|         |              |                                                                                  |   |   |   |   |   |   |   |   |             |       |     |              |
|---------|--------------|----------------------------------------------------------------------------------|---|---|---|---|---|---|---|---|-------------|-------|-----|--------------|
| DTNA    | NM_001198938 | dystrobrevin, alpha                                                              | 0 | 0 | 0 | 0 | 1 | 0 | 0 | 1 | hsa-miR-647 | -0.12 | N/A | Sites in UTR |
| FCGR2B  | NM_001002273 | Fc fragment of IgG, low affinity IIb, receptor (CD32)                            | 0 | 0 | 0 | 0 | 1 | 0 | 0 | 1 | hsa-miR-647 | -0.12 | N/A | Sites in UTR |
| GNAZ    | NM_002073    | guanine nucleotide binding protein (G protein), alpha z polypeptide              | 0 | 0 | 0 | 0 | 1 | 0 | 0 | 1 | hsa-miR-647 | -0.12 | N/A | Sites in UTR |
| ABLIM1  | NM_001003407 | actin binding LIM protein 1                                                      | 0 | 0 | 0 | 0 | 1 | 0 | 0 | 1 | hsa-miR-647 | -0.12 | N/A | Sites in UTR |
| NAA11   | NM_032693    | N(alpha)-acetyltransferase 11, NatA catalytic subunit                            | 0 | 0 | 0 | 0 | 1 | 0 | 0 | 1 | hsa-miR-647 | -0.12 | N/A | Sites in UTR |
| FOXP4   | NM_001012426 | forkhead box P4                                                                  | 0 | 0 | 0 | 0 | 1 | 0 | 0 | 1 | hsa-miR-647 | -0.12 | N/A | Sites in UTR |
| B3GNTL1 | NM_001009905 | UDP-GlcNAc:betaGal beta-1,3-N-acetylglucosaminyltransferase-like 1               | 0 | 0 | 0 | 0 | 1 | 0 | 0 | 1 | hsa-miR-647 | -0.12 | N/A | Sites in UTR |
| SLITRK1 | NM_052910    | SLIT and NTRK-like family, member 1                                              | 0 | 0 | 0 | 0 | 1 | 0 | 1 | 0 | hsa-miR-647 | -0.12 | N/A | Sites in UTR |
| FAM102B | NM_001010883 | family with sequence similarity 102, member B                                    | 0 | 0 | 0 | 0 | 1 | 0 | 1 | 0 | hsa-miR-647 | -0.12 | N/A | Sites in UTR |
| LEP     | NM_000230    | leptin                                                                           | 0 | 0 | 0 | 0 | 2 | 0 | 0 | 2 | hsa-miR-647 | -0.12 | N/A | Sites in UTR |
| RIMKLA  | NM_173642    | ribosomal modification protein rimK-like family member A                         | 0 | 0 | 0 | 0 | 3 | 0 | 2 | 1 | hsa-miR-647 | -0.12 | N/A | Sites in UTR |
| PLEKHM1 | NM_014798    | pleckstrin homology domain containing, family M (with RUN domain) member 1       | 0 | 0 | 0 | 0 | 2 | 0 | 2 | 0 | hsa-miR-647 | -0.12 | N/A | Sites in UTR |
| AKR1D1  | NM_001190906 | aldo-keto reductase family 1, member D1 (delta 4-3-ketosteroid-5-beta-reductase) | 0 | 0 | 0 | 0 | 1 | 0 | 0 | 1 | hsa-miR-647 | -0.12 | N/A | Sites in UTR |
| IQSEC1  | NM_001134382 | IQ motif and Sec7 domain 1                                                       | 0 | 0 | 0 | 0 | 1 | 0 | 0 | 1 | hsa-miR-647 | -0.12 | N/A | Sites in UTR |
| LPCAT3  | NM_005768    | lysophosphatidylcholine acyltransferase 3                                        | 1 | 0 | 0 | 1 | 0 | 0 | 0 | 0 | hsa-miR-647 | -0.12 | N/A | Sites in UTR |
| PAMR1   | NM_001001991 | peptidase domain containing associated with muscle regeneration 1                | 0 | 0 | 0 | 0 | 1 | 0 | 0 | 1 | hsa-miR-647 | -0.12 | N/A | Sites in UTR |
| GPKOW   | NM_015698    | G patch domain and KOW motifs                                                    | 0 | 0 | 0 | 0 | 1 | 0 | 0 | 1 | hsa-miR-647 | -0.12 | N/A | Sites in UTR |
| AMOTL2  | NM_016201    | angiotensin like 2                                                               | 0 | 0 | 0 | 0 | 1 | 0 | 0 | 1 | hsa-miR-647 | -0.12 | N/A | Sites in UTR |

|          |              |                                                                           |   |   |   |   |   |   |   |   |             |       |     |              |
|----------|--------------|---------------------------------------------------------------------------|---|---|---|---|---|---|---|---|-------------|-------|-----|--------------|
| NLGN4X   | NM_020742    | neuroigin 4, X-linked                                                     | 0 | 0 | 0 | 0 | 1 | 0 | 0 | 1 | hsa-miR-647 | -0.12 | N/A | Sites in UTR |
| CAPS     | NM_004058    | calcyphosine                                                              | 0 | 0 | 0 | 0 | 1 | 0 | 1 | 0 | hsa-miR-647 | -0.12 | N/A | Sites in UTR |
| ENTPD2   | NM_001246    | ectonucleoside triphosphate diphosphohydrolase 2                          | 0 | 0 | 0 | 0 | 1 | 0 | 1 | 0 | hsa-miR-647 | -0.12 | N/A | Sites in UTR |
| C3orf70  | NM_001025266 | chromosome 3 open reading frame 70                                        | 1 | 0 | 1 | 0 | 0 | 0 | 0 | 0 | hsa-miR-647 | -0.12 | N/A | Sites in UTR |
| SP6      | NM_199262    | Sp6 transcription factor                                                  | 0 | 0 | 0 | 0 | 2 | 0 | 1 | 1 | hsa-miR-647 | -0.12 | N/A | Sites in UTR |
| CD74     | NM_001025158 | CD74 molecule, major histocompatibility complex, class II invariant chain | 0 | 0 | 0 | 0 | 1 | 0 | 0 | 1 | hsa-miR-647 | -0.12 | N/A | Sites in UTR |
| MAPK14   | NM_001315    | mitogen-activated protein kinase 14                                       | 0 | 0 | 0 | 0 | 1 | 0 | 0 | 1 | hsa-miR-647 | -0.12 | N/A | Sites in UTR |
| MCAM     | NM_006500    | melanoma cell adhesion molecule                                           | 0 | 0 | 0 | 0 | 1 | 0 | 0 | 1 | hsa-miR-647 | -0.12 | N/A | Sites in UTR |
| MUT      | NM_000255    | methylmalonyl CoA mutase                                                  | 0 | 0 | 0 | 0 | 1 | 0 | 0 | 1 | hsa-miR-647 | -0.12 | N/A | Sites in UTR |
| MPHOSPH8 | NM_017520    | M-phase phosphoprotein 8                                                  | 0 | 0 | 0 | 0 | 1 | 0 | 0 | 1 | hsa-miR-647 | -0.12 | N/A | Sites in UTR |
| LEPROT   | NM_001198681 | leptin receptor overlapping transcript                                    | 0 | 0 | 0 | 0 | 1 | 0 | 0 | 1 | hsa-miR-647 | -0.12 | N/A | Sites in UTR |
| CCNJL    | NM_024565    | cyclin J-like                                                             | 0 | 0 | 0 | 0 | 1 | 0 | 0 | 1 | hsa-miR-647 | -0.12 | N/A | Sites in UTR |
| PGLYRP3  | NM_052891    | peptidoglycan recognition protein 3                                       | 0 | 0 | 0 | 0 | 1 | 0 | 0 | 1 | hsa-miR-647 | -0.12 | N/A | Sites in UTR |
| BDH1     | NM_004051    | 3-hydroxybutyrate dehydrogenase, type 1                                   | 0 | 0 | 0 | 0 | 1 | 0 | 1 | 0 | hsa-miR-647 | -0.12 | N/A | Sites in UTR |
| CLDN3    | NM_001306    | claudin 3                                                                 | 0 | 0 | 0 | 0 | 1 | 0 | 1 | 0 | hsa-miR-647 | -0.12 | N/A | Sites in UTR |
| DDX23    | NM_004818    | DEAD (Asp-Glu-Ala-Asp) box polypeptide 23                                 | 0 | 0 | 0 | 0 | 1 | 0 | 1 | 0 | hsa-miR-647 | -0.12 | N/A | Sites in UTR |
| ZNF335   | NM_022095    | zinc finger protein 335                                                   | 0 | 0 | 0 | 0 | 1 | 0 | 1 | 0 | hsa-miR-647 | -0.12 | N/A | Sites in UTR |
| OTUB2    | NM_023112    | OTU domain, ubiquitin aldehyde binding 2                                  | 0 | 0 | 0 | 0 | 1 | 0 | 1 | 0 | hsa-miR-647 | -0.12 | N/A | Sites in UTR |

|           |              |                                                                                          |   |   |   |   |   |   |   |   |             |       |     |              |
|-----------|--------------|------------------------------------------------------------------------------------------|---|---|---|---|---|---|---|---|-------------|-------|-----|--------------|
| KIAA0319L | NM_024874    | KIAA0319-like                                                                            | 0 | 0 | 0 | 0 | 1 | 0 | 1 | 0 | hsa-miR-647 | -0.12 | N/A | Sites in UTR |
| WDR82     | NM_025222    | WD repeat domain 82                                                                      | 0 | 0 | 0 | 0 | 1 | 0 | 1 | 0 | hsa-miR-647 | -0.12 | N/A | Sites in UTR |
| SFTPA2    | NM_001098668 | surfactant protein A2                                                                    | 0 | 0 | 0 | 0 | 1 | 0 | 1 | 0 | hsa-miR-647 | -0.12 | N/A | Sites in UTR |
| STK35     | NM_080836    | serine/threonine kinase 35                                                               | 0 | 0 | 0 | 0 | 2 | 0 | 2 | 0 | hsa-miR-647 | -0.12 | N/A | Sites in UTR |
| SH3PXD2A  | NM_014631    | SH3 and PX domains 2A                                                                    | 0 | 0 | 0 | 0 | 2 | 0 | 2 | 0 | hsa-miR-647 | -0.12 | N/A | Sites in UTR |
| STC2      | NM_003714    | stanniocalcin 2                                                                          | 1 | 0 | 0 | 1 | 1 | 0 | 1 | 0 | hsa-miR-647 | -0.12 | N/A | Sites in UTR |
| MON2      | NM_015026    | MON2 homolog ( <i>S. cerevisiae</i> )                                                    | 0 | 0 | 0 | 0 | 2 | 0 | 1 | 1 | hsa-miR-647 | -0.12 | N/A | Sites in UTR |
| ALAD      | NM_000031    | aminolevulinatase dehydratase                                                            | 0 | 0 | 0 | 0 | 1 | 0 | 0 | 1 | hsa-miR-647 | -0.12 | N/A | Sites in UTR |
| GNGT2     | NM_001198754 | guanine nucleotide binding protein (G protein), gamma transducing activity polypeptide 2 | 0 | 0 | 0 | 0 | 1 | 0 | 0 | 1 | hsa-miR-647 | -0.12 | N/A | Sites in UTR |
| GREB1     | NM_014668    | growth regulation by estrogen in breast cancer 1                                         | 0 | 0 | 0 | 0 | 1 | 0 | 0 | 1 | hsa-miR-647 | -0.12 | N/A | Sites in UTR |
| XPO6      | NM_015171    | exportin 6                                                                               | 0 | 0 | 0 | 0 | 1 | 0 | 0 | 1 | hsa-miR-647 | -0.12 | N/A | Sites in UTR |
| TIPARP    | NM_001184717 | TCDD-inducible poly(ADP-ribose) polymerase                                               | 0 | 0 | 0 | 0 | 1 | 0 | 0 | 1 | hsa-miR-647 | -0.12 | N/A | Sites in UTR |
| CACNA1H   | NM_001005407 | calcium channel, voltage-dependent, T type, alpha 1H subunit                             | 0 | 0 | 0 | 0 | 1 | 0 | 1 | 0 | hsa-miR-647 | -0.12 | N/A | Sites in UTR |
| XPR1      | NM_001135669 | xenotropic and polytropic retrovirus receptor 1                                          | 0 | 0 | 0 | 0 | 1 | 0 | 1 | 0 | hsa-miR-647 | -0.12 | N/A | Sites in UTR |
| SELENBP1  | NM_003944    | selenium binding protein 1                                                               | 0 | 0 | 0 | 0 | 1 | 0 | 0 | 1 | hsa-miR-647 | -0.12 | N/A | Sites in UTR |
| LARGE     | NM_004737    | like-glycosyltransferase                                                                 | 0 | 0 | 0 | 0 | 1 | 0 | 0 | 1 | hsa-miR-647 | -0.12 | N/A | Sites in UTR |
| GPC6      | NM_005708    | glypican 6                                                                               | 0 | 0 | 0 | 0 | 1 | 0 | 0 | 1 | hsa-miR-647 | -0.12 | N/A | Sites in UTR |
| FKBP15    | NM_015258    | FK506 binding protein 15, 133kDa                                                         | 0 | 0 | 0 | 0 | 1 | 0 | 0 | 1 | hsa-miR-647 | -0.12 | N/A | Sites in UTR |

|          |              |                                                                 |   |   |   |   |   |   |   |   |             |       |     |              |
|----------|--------------|-----------------------------------------------------------------|---|---|---|---|---|---|---|---|-------------|-------|-----|--------------|
| KCTD18   | NM_152387    | potassium channel tetramerisation domain containing 18          | 0 | 0 | 0 | 0 | 1 | 0 | 0 | 1 | hsa-miR-647 | -0.12 | N/A | Sites in UTR |
| EVPLL    | NM_001145127 | envoplakin-like                                                 | 0 | 0 | 0 | 0 | 1 | 0 | 0 | 1 | hsa-miR-647 | -0.12 | N/A | Sites in UTR |
| RRBP1    | NM_001042576 | ribosome binding protein 1 homolog 180kDa (dog)                 | 0 | 0 | 0 | 0 | 1 | 0 | 1 | 0 | hsa-miR-647 | -0.12 | N/A | Sites in UTR |
| SMG6     | NM_001170957 | smg-6 homolog, nonsense mediated mRNA decay factor (C. elegans) | 0 | 0 | 0 | 0 | 1 | 0 | 1 | 0 | hsa-miR-647 | -0.12 | N/A | Sites in UTR |
| CDC42EP4 | NM_012121    | CDC42 effector protein (Rho GTPase binding) 4                   | 0 | 0 | 0 | 0 | 1 | 0 | 1 | 0 | hsa-miR-647 | -0.12 | N/A | Sites in UTR |
| SEC31B   | NM_015490    | SEC31 homolog B (S. cerevisiae)                                 | 0 | 0 | 0 | 0 | 1 | 0 | 1 | 0 | hsa-miR-647 | -0.12 | N/A | Sites in UTR |
| ONECUT2  | NM_004852    | one cut homeobox 2                                              | 0 | 0 | 0 | 0 | 3 | 0 | 1 | 2 | hsa-miR-647 | -0.12 | N/A | Sites in UTR |
| PLXDC1   | NM_020405    | plexin domain containing 1                                      | 1 | 0 | 0 | 1 | 2 | 0 | 1 | 1 | hsa-miR-647 | -0.12 | N/A | Sites in UTR |
| IGSF1    | NM_001170963 | immunoglobulin superfamily, member 1                            | 0 | 0 | 0 | 0 | 1 | 0 | 0 | 1 | hsa-miR-647 | -0.12 | N/A | Sites in UTR |
| DEK      | NM_001134709 | DEK oncogene                                                    | 0 | 0 | 0 | 0 | 1 | 0 | 0 | 1 | hsa-miR-647 | -0.12 | N/A | Sites in UTR |
| ARHGEF11 | NM_014784    | Rho guanine nucleotide exchange factor (GEF) 11                 | 0 | 0 | 0 | 0 | 1 | 0 | 0 | 1 | hsa-miR-647 | -0.12 | N/A | Sites in UTR |
| SLC25A39 | NM_001143780 | solute carrier family 25, member 39                             | 0 | 0 | 0 | 0 | 1 | 0 | 0 | 1 | hsa-miR-647 | -0.12 | N/A | Sites in UTR |
| NXN      | NM_001205319 | nucleoredoxin                                                   | 0 | 0 | 0 | 0 | 1 | 0 | 0 | 1 | hsa-miR-647 | -0.12 | N/A | Sites in UTR |
| KCNIP4   | NM_001035003 | Kv channel interacting protein 4                                | 0 | 0 | 0 | 0 | 1 | 0 | 0 | 1 | hsa-miR-647 | -0.12 | N/A | Sites in UTR |
| CACNA2D4 | NM_172364    | calcium channel, voltage-dependent, alpha 2/delta subunit 4     | 0 | 0 | 0 | 0 | 1 | 0 | 0 | 1 | hsa-miR-647 | -0.12 | N/A | Sites in UTR |
| THEMIS   | NM_001010923 | thymocyte selection associated                                  | 0 | 0 | 0 | 0 | 1 | 0 | 0 | 1 | hsa-miR-647 | -0.12 | N/A | Sites in UTR |
| PRR23A   | NM_001134659 | proline rich 23A                                                | 0 | 0 | 0 | 0 | 1 | 0 | 0 | 1 | hsa-miR-647 | -0.12 | N/A | Sites in UTR |
| CYP11B1  | NM_000497    | cytochrome P450, family 11, subfamily B, polypeptide 1          | 0 | 0 | 0 | 0 | 1 | 0 | 1 | 0 | hsa-miR-647 | -0.12 | N/A | Sites in UTR |

|         |              |                                                                                  |   |   |   |   |   |   |   |   |             |       |     |              |
|---------|--------------|----------------------------------------------------------------------------------|---|---|---|---|---|---|---|---|-------------|-------|-----|--------------|
| HRH3    | NM_007232    | histamine receptor H3                                                            | 0 | 0 | 0 | 0 | 1 | 0 | 1 | 0 | hsa-miR-647 | -0.12 | N/A | Sites in UTR |
| CENPO   | NM_001199803 | centromere protein O                                                             | 0 | 0 | 0 | 0 | 1 | 0 | 1 | 0 | hsa-miR-647 | -0.12 | N/A | Sites in UTR |
| CCDC48  | NM_024768    | coiled-coil domain containing 48                                                 | 0 | 0 | 0 | 0 | 1 | 0 | 1 | 0 | hsa-miR-647 | -0.12 | N/A | Sites in UTR |
| SNX30   | NM_001012994 | sorting nexin family member 30                                                   | 0 | 0 | 0 | 0 | 2 | 0 | 1 | 1 | hsa-miR-647 | -0.12 | N/A | Sites in UTR |
| GRM1    | NM_000838    | glutamate receptor, metabotropic 1                                               | 0 | 0 | 0 | 0 | 1 | 0 | 0 | 1 | hsa-miR-647 | -0.12 | N/A | Sites in UTR |
| NPAS2   | NM_002518    | neuronal PAS domain protein 2                                                    | 0 | 0 | 0 | 0 | 1 | 0 | 0 | 1 | hsa-miR-647 | -0.12 | N/A | Sites in UTR |
| SCNN1A  | NM_001038    | sodium channel, nonvoltage-gated 1 alpha                                         | 1 | 0 | 0 | 1 | 0 | 0 | 0 | 0 | hsa-miR-647 | -0.12 | N/A | Sites in UTR |
| STAT3   | NM_003150    | signal transducer and activator of transcription 3 (acute-phase response factor) | 0 | 0 | 0 | 0 | 1 | 0 | 0 | 1 | hsa-miR-647 | -0.12 | N/A | Sites in UTR |
| PCSK7   | NM_004716    | proprotein convertase subtilisin/kexin type 7                                    | 0 | 0 | 0 | 0 | 1 | 0 | 0 | 1 | hsa-miR-647 | -0.12 | N/A | Sites in UTR |
| UBE4B   | NM_001105562 | ubiquitination factor E4B                                                        | 0 | 0 | 0 | 0 | 1 | 0 | 0 | 1 | hsa-miR-647 | -0.12 | N/A | Sites in UTR |
| LPPR2   | NM_001170635 | lipid phosphate phosphatase-related protein type 2                               | 0 | 0 | 0 | 0 | 1 | 0 | 0 | 1 | hsa-miR-647 | -0.12 | N/A | Sites in UTR |
| DIRC2   | NM_032839    | disrupted in renal carcinoma 2                                                   | 0 | 0 | 0 | 0 | 1 | 0 | 0 | 1 | hsa-miR-647 | -0.12 | N/A | Sites in UTR |
| ULK2    | NM_014683    | unc-51-like kinase 2 (C. elegans)                                                | 0 | 0 | 0 | 0 | 2 | 1 | 1 | 0 | hsa-miR-647 | -0.12 | N/A | Sites in UTR |
| CHM     | NM_000390    | choroideremia (Rab escort protein 1)                                             | 0 | 0 | 0 | 0 | 1 | 0 | 1 | 0 | hsa-miR-647 | -0.12 | N/A | Sites in UTR |
| USP40   | NM_018218    | ubiquitin specific peptidase 40                                                  | 0 | 0 | 0 | 0 | 1 | 0 | 1 | 0 | hsa-miR-647 | -0.12 | N/A | Sites in UTR |
| ANKRD40 | NM_052855    | ankyrin repeat domain 40                                                         | 0 | 0 | 0 | 0 | 1 | 0 | 1 | 0 | hsa-miR-647 | -0.12 | N/A | Sites in UTR |
| FAM109A | NM_001177996 | family with sequence similarity 109, member A                                    | 0 | 0 | 0 | 0 | 1 | 0 | 1 | 0 | hsa-miR-647 | -0.12 | N/A | Sites in UTR |
| C9orf96 | NM_153710    | chromosome 9 open reading frame 96                                               | 0 | 0 | 0 | 0 | 1 | 0 | 1 | 0 | hsa-miR-647 | -0.12 | N/A | Sites in UTR |

|         |              |                                                                                                   |   |   |   |   |   |   |   |   |             |       |     |              |
|---------|--------------|---------------------------------------------------------------------------------------------------|---|---|---|---|---|---|---|---|-------------|-------|-----|--------------|
| ZNF605  | NM_001164715 | zinc finger protein 605                                                                           | 0 | 0 | 0 | 0 | 1 | 0 | 1 | 0 | hsa-miR-647 | -0.12 | N/A | Sites in UTR |
| YPEL2   | NM_001005404 | yippee-like 2 (Drosophila)                                                                        | 0 | 0 | 0 | 0 | 2 | 1 | 0 | 1 | hsa-miR-647 | -0.12 | N/A | Sites in UTR |
| CASP7   | NM_001227    | caspase 7, apoptosis-related cysteine peptidase                                                   | 0 | 0 | 0 | 0 | 1 | 0 | 0 | 1 | hsa-miR-647 | -0.12 | N/A | Sites in UTR |
| IPO5    | NM_002271    | importin 5                                                                                        | 0 | 0 | 0 | 0 | 1 | 0 | 0 | 1 | hsa-miR-647 | -0.12 | N/A | Sites in UTR |
| MCSR    | NM_005913    | melanocortin 5 receptor                                                                           | 0 | 0 | 0 | 0 | 1 | 0 | 0 | 1 | hsa-miR-647 | -0.12 | N/A | Sites in UTR |
| SMARCC1 | NM_003074    | SWI/SNF related, matrix associated, actin dependent regulator of chromatin, subfamily c, member 1 | 0 | 0 | 0 | 0 | 1 | 0 | 0 | 1 | hsa-miR-647 | -0.12 | N/A | Sites in UTR |
| STOML1  | NM_004809    | stomatin (EPB72)-like 1                                                                           | 0 | 0 | 0 | 0 | 1 | 0 | 0 | 1 | hsa-miR-647 | -0.12 | N/A | Sites in UTR |
| RAI14   | NM_001145520 | retinoic acid induced 14                                                                          | 0 | 0 | 0 | 0 | 1 | 0 | 0 | 1 | hsa-miR-647 | -0.12 | N/A | Sites in UTR |
| GSTCD   | NM_024751    | glutathione S-transferase, C-terminal domain containing                                           | 0 | 0 | 0 | 0 | 1 | 0 | 0 | 1 | hsa-miR-647 | -0.12 | N/A | Sites in UTR |
| TMEM42  | NM_144638    | transmembrane protein 42                                                                          | 0 | 0 | 0 | 0 | 1 | 0 | 0 | 1 | hsa-miR-647 | -0.12 | N/A | Sites in UTR |
| ARL10   | NM_173664    | ADP-ribosylation factor-like 10                                                                   | 0 | 0 | 0 | 0 | 1 | 0 | 0 | 1 | hsa-miR-647 | -0.12 | N/A | Sites in UTR |
| KAAG1   | NM_181337    | kidney associated antigen 1                                                                       | 0 | 0 | 0 | 0 | 1 | 0 | 0 | 1 | hsa-miR-647 | -0.12 | N/A | Sites in UTR |
| SLC8A2  | NM_015063    | solute carrier family 8 (sodium/calcium exchanger), member 2                                      | 1 | 0 | 0 | 1 | 1 | 0 | 0 | 1 | hsa-miR-647 | -0.12 | N/A | Sites in UTR |
| PODXL   | NM_001018111 | podocalyxin-like                                                                                  | 0 | 0 | 0 | 0 | 1 | 0 | 1 | 0 | hsa-miR-647 | -0.12 | N/A | Sites in UTR |
| PEX16   | NM_004813    | peroxisomal biogenesis factor 16                                                                  | 0 | 0 | 0 | 0 | 1 | 0 | 1 | 0 | hsa-miR-647 | -0.12 | N/A | Sites in UTR |
| MED26   | NM_004831    | mediator complex subunit 26                                                                       | 0 | 0 | 0 | 0 | 1 | 0 | 1 | 0 | hsa-miR-647 | -0.12 | N/A | Sites in UTR |
| TNRC6A  | NM_014494    | trinucleotide repeat containing 6A                                                                | 0 | 0 | 0 | 0 | 1 | 0 | 1 | 0 | hsa-miR-647 | -0.12 | N/A | Sites in UTR |
| NLE1    | NM_001014445 | notchless homolog 1 (Drosophila)                                                                  | 0 | 0 | 0 | 0 | 1 | 0 | 1 | 0 | hsa-miR-647 | -0.12 | N/A | Sites in UTR |



|          |              |                                                                                                       |   |   |   |   |   |   |   |   |             |       |     |              |
|----------|--------------|-------------------------------------------------------------------------------------------------------|---|---|---|---|---|---|---|---|-------------|-------|-----|--------------|
| C20orf29 | NM_001204446 | chromosome 20 open reading frame 29                                                                   | 0 | 0 | 0 | 0 | 1 | 0 | 1 | 0 | hsa-miR-647 | -0.12 | N/A | Sites in UTR |
| THSD7A   | NM_015204    | thrombospondin, type I, domain containing 7A                                                          | 0 | 0 | 0 | 0 | 1 | 0 | 1 | 0 | hsa-miR-647 | -0.12 | N/A | Sites in UTR |
| FSTL1    | NM_007085    | follistatin-like 1                                                                                    | 0 | 0 | 0 | 0 | 1 | 1 | 0 | 0 | hsa-miR-647 | -0.12 | N/A | Sites in UTR |
| ANO6     | NM_001025356 | anoctamin 6                                                                                           | 0 | 0 | 0 | 0 | 1 | 1 | 0 | 0 | hsa-miR-647 | -0.12 | N/A | Sites in UTR |
| LPHN1    | NM_001008701 | latrophilin 1                                                                                         | 1 | 0 | 1 | 0 | 1 | 0 | 1 | 0 | hsa-miR-647 | -0.12 | N/A | Sites in UTR |
| ITGAL    | NM_001114380 | integrin, alpha L (antigen CD11A (p180), lymphocyte function-associated antigen 1; alpha polypeptide) | 0 | 0 | 0 | 0 | 1 | 0 | 0 | 1 | hsa-miR-647 | -0.12 | N/A | Sites in UTR |
| RALGPS1  | NM_001190730 | Ral GEF with PH domain and SH3 binding motif 1                                                        | 0 | 0 | 0 | 0 | 1 | 0 | 0 | 1 | hsa-miR-647 | -0.12 | N/A | Sites in UTR |
| ABHD5    | NM_016006    | abhydrolase domain containing 5                                                                       | 0 | 0 | 0 | 0 | 1 | 0 | 0 | 1 | hsa-miR-647 | -0.12 | N/A | Sites in UTR |
| GOLGA6C  | NM_001164404 | golgin A6 family, member C                                                                            | 0 | 0 | 0 | 0 | 1 | 0 | 0 | 1 | hsa-miR-647 | -0.12 | N/A | Sites in UTR |
| CELSR2   | NM_001408    | cadherin, EGF LAG seven-pass G-type receptor 2 (flamingo homolog, Drosophila)                         | 0 | 0 | 0 | 0 | 1 | 0 | 1 | 0 | hsa-miR-647 | -0.12 | N/A | Sites in UTR |
| FOXE1    | NM_004473    | forkhead box E1 (thyroid transcription factor 2)                                                      | 0 | 0 | 0 | 0 | 1 | 0 | 1 | 0 | hsa-miR-647 | -0.12 | N/A | Sites in UTR |
| PRKCE    | NM_005400    | protein kinase C, epsilon                                                                             | 0 | 0 | 0 | 0 | 1 | 0 | 1 | 0 | hsa-miR-647 | -0.12 | N/A | Sites in UTR |
| ST3GAL1  | NM_003033    | ST3 beta-galactoside alpha-2,3-sialyltransferase 1                                                    | 0 | 0 | 0 | 0 | 1 | 0 | 1 | 0 | hsa-miR-647 | -0.12 | N/A | Sites in UTR |
| THRAP3   | NM_005119    | thyroid hormone receptor associated protein 3                                                         | 0 | 0 | 0 | 0 | 1 | 0 | 1 | 0 | hsa-miR-647 | -0.12 | N/A | Sites in UTR |
| KAT8     | NM_182958    | K(lysine) acetyltransferase 8                                                                         | 0 | 0 | 0 | 0 | 1 | 0 | 1 | 0 | hsa-miR-647 | -0.12 | N/A | Sites in UTR |
| KNCN     | NM_001097611 | kinocilin                                                                                             | 0 | 0 | 0 | 0 | 1 | 0 | 1 | 0 | hsa-miR-647 | -0.12 | N/A | Sites in UTR |
| EIF2C4   | NM_017629    | eukaryotic translation initiation factor 2C, 4                                                        | 0 | 0 | 0 | 0 | 1 | 0 | 1 | 0 | hsa-miR-647 | -0.12 | N/A | Sites in UTR |
| SPRY3    | NM_005840    | sprouty homolog 3 (Drosophila)                                                                        | 0 | 0 | 0 | 0 | 2 | 0 | 1 | 1 | hsa-miR-647 | -0.12 | N/A | Sites in UTR |

|          |              |                                                             |   |   |   |   |   |   |   |   |             |       |     |              |
|----------|--------------|-------------------------------------------------------------|---|---|---|---|---|---|---|---|-------------|-------|-----|--------------|
| KLLN     | NM_001126049 | killin, p53-regulated DNA replication inhibitor             | 1 | 0 | 0 | 1 | 0 | 0 | 0 | 0 | hsa-miR-647 | -0.11 | N/A | Sites in UTR |
| TP53I11  | NM_001076787 | tumor protein p53 inducible protein 11                      | 0 | 0 | 0 | 0 | 2 | 0 | 0 | 2 | hsa-miR-647 | -0.11 | N/A | Sites in UTR |
| ATP2A2   | NM_001681    | ATPase, Ca++ transporting, cardiac muscle, slow twitch 2    | 0 | 0 | 0 | 0 | 1 | 0 | 0 | 1 | hsa-miR-647 | -0.11 | N/A | Sites in UTR |
| CALM3    | NM_005184    | calmodulin 3 (phosphorylase kinase, delta)                  | 0 | 0 | 0 | 0 | 1 | 0 | 0 | 1 | hsa-miR-647 | -0.11 | N/A | Sites in UTR |
| NCAM2    | NM_004540    | neural cell adhesion molecule 2                             | 0 | 0 | 0 | 0 | 1 | 0 | 0 | 1 | hsa-miR-647 | -0.11 | N/A | Sites in UTR |
| VEPH1    | NM_001167911 | ventricular zone expressed PH domain homolog 1 (zebrafish)  | 0 | 0 | 0 | 0 | 1 | 0 | 0 | 1 | hsa-miR-647 | -0.11 | N/A | Sites in UTR |
| TRIM15   | NM_033229    | tripartite motif containing 15                              | 0 | 0 | 0 | 0 | 1 | 0 | 0 | 1 | hsa-miR-647 | -0.11 | N/A | Sites in UTR |
| CABLES1  | NM_001100619 | Cdk5 and Abl enzyme substrate 1                             | 0 | 0 | 0 | 0 | 1 | 0 | 0 | 1 | hsa-miR-647 | -0.11 | N/A | Sites in UTR |
| GATA4    | NM_002052    | GATA binding protein 4                                      | 0 | 0 | 0 | 0 | 1 | 0 | 1 | 0 | hsa-miR-647 | -0.11 | N/A | Sites in UTR |
| FAM53B   | NM_014661    | family with sequence similarity 53, member B                | 0 | 0 | 0 | 0 | 1 | 0 | 1 | 0 | hsa-miR-647 | -0.11 | N/A | Sites in UTR |
| POC1A    | NM_001161580 | POC1 centriolar protein homolog A (Chlamydomonas)           | 0 | 0 | 0 | 0 | 1 | 0 | 1 | 0 | hsa-miR-647 | -0.11 | N/A | Sites in UTR |
| DUSP13   | NM_001007271 | dual specificity phosphatase 13                             | 0 | 0 | 0 | 0 | 1 | 0 | 1 | 0 | hsa-miR-647 | -0.11 | N/A | Sites in UTR |
| FZR1     | NM_001136197 | fizzy/cell division cycle 20 related 1 (Drosophila)         | 0 | 0 | 0 | 0 | 1 | 0 | 1 | 0 | hsa-miR-647 | -0.11 | N/A | Sites in UTR |
| RNF41    | NM_001242826 | ring finger protein 41                                      | 1 | 1 | 0 | 0 | 0 | 0 | 0 | 0 | hsa-miR-647 | -0.11 | N/A | Sites in UTR |
| KIAA0889 | NM_080627    | KIAA0889                                                    | 0 | 0 | 0 | 0 | 3 | 1 | 2 | 0 | hsa-miR-647 | -0.11 | N/A | Sites in UTR |
| STOM     | NM_004099    | stomatin                                                    | 0 | 0 | 0 | 0 | 1 | 0 | 0 | 1 | hsa-miR-647 | -0.11 | N/A | Sites in UTR |
| MUC7     | NM_001145006 | mucin 7, secreted                                           | 0 | 0 | 0 | 0 | 1 | 0 | 0 | 1 | hsa-miR-647 | -0.11 | N/A | Sites in UTR |
| PRKAB2   | NM_005399    | protein kinase, AMP-activated, beta 2 non-catalytic subunit | 0 | 0 | 0 | 0 | 1 | 0 | 0 | 1 | hsa-miR-647 | -0.11 | N/A | Sites in UTR |

|          |              |                                                                       |   |   |   |   |   |   |   |   |             |       |     |              |
|----------|--------------|-----------------------------------------------------------------------|---|---|---|---|---|---|---|---|-------------|-------|-----|--------------|
| DYM      | NM_017653    | dymeclin                                                              | 0 | 0 | 0 | 0 | 1 | 0 | 0 | 1 | hsa-miR-647 | -0.11 | N/A | Sites in UTR |
| DHRX     | NM_145177    | dehydrogenase/reductase (SDR family) X-linked                         | 0 | 0 | 0 | 0 | 1 | 0 | 0 | 1 | hsa-miR-647 | -0.11 | N/A | Sites in UTR |
| ZNF81    | NM_007137    | zinc finger protein 81                                                | 0 | 0 | 0 | 0 | 1 | 0 | 0 | 1 | hsa-miR-647 | -0.11 | N/A | Sites in UTR |
| BTBD18   | NM_001145101 | BTB (POZ) domain containing 18                                        | 0 | 0 | 0 | 0 | 1 | 0 | 0 | 1 | hsa-miR-647 | -0.11 | N/A | Sites in UTR |
| MED1     | NM_004774    | mediator complex subunit 1                                            | 1 | 0 | 1 | 0 | 0 | 0 | 0 | 0 | hsa-miR-647 | -0.11 | N/A | Sites in UTR |
| PEA15    | NM_003768    | phosphoprotein enriched in astrocytes 15                              | 0 | 0 | 0 | 0 | 1 | 0 | 1 | 0 | hsa-miR-647 | -0.11 | N/A | Sites in UTR |
| CBFA2T2  | NM_001032999 | core-binding factor, runt domain, alpha subunit 2; translocated to, 2 | 0 | 0 | 0 | 0 | 1 | 0 | 1 | 0 | hsa-miR-647 | -0.11 | N/A | Sites in UTR |
| C17orf62 | NM_001033046 | chromosome 17 open reading frame 62                                   | 0 | 0 | 0 | 0 | 1 | 0 | 1 | 0 | hsa-miR-647 | -0.11 | N/A | Sites in UTR |
| ENPP7    | NM_178543    | ectonucleotide pyrophosphatase/phosphodiesterase 7                    | 0 | 0 | 0 | 0 | 1 | 0 | 1 | 0 | hsa-miR-647 | -0.11 | N/A | Sites in UTR |
| KAT2A    | NM_021078    | K(lysine) acetyltransferase 2A                                        | 0 | 0 | 0 | 0 | 1 | 0 | 0 | 1 | hsa-miR-647 | -0.11 | N/A | Sites in UTR |
| IRF1     | NM_002198    | interferon regulatory factor 1                                        | 0 | 0 | 0 | 0 | 1 | 0 | 0 | 1 | hsa-miR-647 | -0.11 | N/A | Sites in UTR |
| TERT     | NM_001193376 | telomerase reverse transcriptase                                      | 0 | 0 | 0 | 0 | 1 | 0 | 0 | 1 | hsa-miR-647 | -0.11 | N/A | Sites in UTR |
| NT5C2    | NM_001134373 | 5'-nucleotidase, cytosolic II                                         | 0 | 0 | 0 | 0 | 1 | 0 | 0 | 1 | hsa-miR-647 | -0.11 | N/A | Sites in UTR |
| C17orf53 | NM_001171251 | chromosome 17 open reading frame 53                                   | 0 | 0 | 0 | 0 | 1 | 0 | 0 | 1 | hsa-miR-647 | -0.11 | N/A | Sites in UTR |
| CLPTM1L  | NM_030782    | CLPTM1-like                                                           | 0 | 0 | 0 | 0 | 1 | 0 | 0 | 1 | hsa-miR-647 | -0.11 | N/A | Sites in UTR |
| DEF8     | NM_001242816 | differentially expressed in FDCP 8 homolog (mouse)                    | 0 | 0 | 0 | 0 | 2 | 0 | 0 | 2 | hsa-miR-647 | -0.11 | N/A | Sites in UTR |
| ADAMTS5  | NM_007038    | ADAM metalloproteinase with thrombospondin type 1 motif, 5            | 0 | 0 | 0 | 0 | 3 | 0 | 1 | 2 | hsa-miR-647 | -0.11 | N/A | Sites in UTR |
| KCNB1    | NM_004975    | potassium voltage-gated channel, Shab-related subfamily, member 1     | 0 | 0 | 0 | 0 | 1 | 0 | 0 | 1 | hsa-miR-647 | -0.11 | N/A | Sites in UTR |

|           |              |                                                                |   |   |   |   |   |   |   |   |             |       |     |              |
|-----------|--------------|----------------------------------------------------------------|---|---|---|---|---|---|---|---|-------------|-------|-----|--------------|
| MOV10     | NM_001130079 | Mov10, Moloney leukemia virus 10, homolog (mouse)              | 0 | 0 | 0 | 0 | 1 | 0 | 0 | 1 | hsa-miR-647 | -0.11 | N/A | Sites in UTR |
| GPR68     | NM_001177676 | G protein-coupled receptor 68                                  | 0 | 0 | 0 | 0 | 1 | 0 | 0 | 1 | hsa-miR-647 | -0.11 | N/A | Sites in UTR |
| LEPROTL1  | NM_015344    | leptin receptor overlapping transcript-like 1                  | 0 | 0 | 0 | 0 | 1 | 0 | 0 | 1 | hsa-miR-647 | -0.11 | N/A | Sites in UTR |
| FAM54B    | NM_001099625 | family with sequence similarity 54, member B                   | 0 | 0 | 0 | 0 | 1 | 0 | 0 | 1 | hsa-miR-647 | -0.11 | N/A | Sites in UTR |
| DNAJC30   | NM_032317    | DnaJ (Hsp40) homolog, subfamily C, member 30                   | 0 | 0 | 0 | 0 | 1 | 0 | 0 | 1 | hsa-miR-647 | -0.11 | N/A | Sites in UTR |
| NALCN     | NM_052867    | sodium leak channel, non-selective                             | 0 | 0 | 0 | 0 | 1 | 0 | 0 | 1 | hsa-miR-647 | -0.11 | N/A | Sites in UTR |
| SMTNL2    | NM_001114974 | smoothelin-like 2                                              | 0 | 0 | 0 | 0 | 1 | 0 | 0 | 1 | hsa-miR-647 | -0.11 | N/A | Sites in UTR |
| ZNF805    | NM_001023563 | zinc finger protein 805                                        | 0 | 0 | 0 | 0 | 1 | 0 | 0 | 1 | hsa-miR-647 | -0.11 | N/A | Sites in UTR |
| PHYHIP    | NM_001099335 | phytanoyl-CoA 2-hydroxylase interacting protein                | 0 | 0 | 0 | 0 | 1 | 0 | 1 | 0 | hsa-miR-647 | -0.11 | N/A | Sites in UTR |
| C10orf116 | NM_006829    | chromosome 10 open reading frame 116                           | 0 | 0 | 0 | 0 | 1 | 0 | 1 | 0 | hsa-miR-647 | -0.11 | N/A | Sites in UTR |
| KIAA1467  | NM_020853    | KIAA1467                                                       | 0 | 0 | 0 | 0 | 1 | 0 | 1 | 0 | hsa-miR-647 | -0.11 | N/A | Sites in UTR |
| CSRN3     | NM_001172173 | cysteine-serine-rich nuclear protein 3                         | 0 | 0 | 0 | 0 | 1 | 0 | 1 | 0 | hsa-miR-647 | -0.11 | N/A | Sites in UTR |
| OPCML     | NM_001012393 | opioid binding protein/cell adhesion molecule-like             | 0 | 0 | 0 | 0 | 1 | 1 | 0 | 0 | hsa-miR-647 | -0.11 | N/A | Sites in UTR |
| HIPK2     | NM_001113239 | homeodomain interacting protein kinase 2                       | 0 | 0 | 0 | 0 | 3 | 0 | 2 | 1 | hsa-miR-647 | -0.11 | N/A | Sites in UTR |
| BDKRB2    | NM_000623    | bradykinin receptor B2                                         | 0 | 0 | 0 | 0 | 1 | 0 | 0 | 1 | hsa-miR-647 | -0.11 | N/A | Sites in UTR |
| TLX1      | NM_001195517 | T-cell leukemia homeobox 1                                     | 0 | 0 | 0 | 0 | 1 | 0 | 0 | 1 | hsa-miR-647 | -0.11 | N/A | Sites in UTR |
| NGFR      | NM_002507    | nerve growth factor receptor                                   | 0 | 0 | 0 | 0 | 1 | 0 | 0 | 1 | hsa-miR-647 | -0.11 | N/A | Sites in UTR |
| TIMM44    | NM_006351    | translocase of inner mitochondrial membrane 44 homolog (yeast) | 0 | 0 | 0 | 0 | 1 | 0 | 0 | 1 | hsa-miR-647 | -0.11 | N/A | Sites in UTR |

|         |              |                                                                     |   |   |   |   |   |   |   |   |             |       |     |              |
|---------|--------------|---------------------------------------------------------------------|---|---|---|---|---|---|---|---|-------------|-------|-----|--------------|
| TRIM38  | NM_006355    | tripartite motif containing 38                                      | 0 | 0 | 0 | 0 | 1 | 0 | 0 | 1 | hsa-miR-647 | -0.11 | N/A | Sites in UTR |
| THAP10  | NM_020147    | THAP domain containing 10                                           | 0 | 0 | 0 | 0 | 1 | 0 | 0 | 1 | hsa-miR-647 | -0.11 | N/A | Sites in UTR |
| ZNF398  | NM_020781    | zinc finger protein 398                                             | 0 | 0 | 0 | 0 | 1 | 0 | 0 | 1 | hsa-miR-647 | -0.11 | N/A | Sites in UTR |
| TSLP    | NM_033035    | thymic stromal lymphopoietin                                        | 0 | 0 | 0 | 0 | 1 | 0 | 0 | 1 | hsa-miR-647 | -0.11 | N/A | Sites in UTR |
| SERINC2 | NM_001199037 | serine incorporator 2                                               | 0 | 0 | 0 | 0 | 1 | 0 | 0 | 1 | hsa-miR-647 | -0.11 | N/A | Sites in UTR |
| C21orf2 | NM_004928    | chromosome 21 open reading frame 2                                  | 0 | 0 | 0 | 0 | 1 | 0 | 1 | 0 | hsa-miR-647 | -0.11 | N/A | Sites in UTR |
| KIFC3   | NM_001130099 | kinesin family member C3                                            | 0 | 0 | 0 | 0 | 1 | 0 | 1 | 0 | hsa-miR-647 | -0.11 | N/A | Sites in UTR |
| OTUD5   | NM_001136157 | OTU domain containing 5                                             | 1 | 0 | 1 | 0 | 0 | 0 | 0 | 0 | hsa-miR-647 | -0.11 | N/A | Sites in UTR |
| NACC1   | NM_052876    | nucleus accumbens associated 1, BEN and BTB (POZ) domain containing | 0 | 0 | 0 | 0 | 1 | 0 | 1 | 0 | hsa-miR-647 | -0.11 | N/A | Sites in UTR |
| FGF1    | NM_000800    | fibroblast growth factor 1 (acidic)                                 | 0 | 0 | 0 | 0 | 1 | 0 | 0 | 1 | hsa-miR-647 | -0.11 | N/A | Sites in UTR |
| WARS2   | NM_015836    | tryptophanyl tRNA synthetase 2, mitochondrial                       | 0 | 0 | 0 | 0 | 1 | 0 | 0 | 1 | hsa-miR-647 | -0.11 | N/A | Sites in UTR |
| RBPMS   | NM_006867    | RNA binding protein with multiple splicing                          | 0 | 0 | 0 | 0 | 1 | 0 | 0 | 1 | hsa-miR-647 | -0.11 | N/A | Sites in UTR |
| C9orf68 | NM_001039395 | chromosome 9 open reading frame 68                                  | 0 | 0 | 0 | 0 | 1 | 0 | 0 | 1 | hsa-miR-647 | -0.11 | N/A | Sites in UTR |
| TSGA14  | NM_018718    | testis specific, 14                                                 | 1 | 0 | 0 | 1 | 0 | 0 | 0 | 0 | hsa-miR-647 | -0.11 | N/A | Sites in UTR |
| COL8A2  | NM_005202    | collagen, type VIII, alpha 2                                        | 0 | 0 | 0 | 0 | 1 | 0 | 1 | 0 | hsa-miR-647 | -0.11 | N/A | Sites in UTR |
| MAPT    | NM_001123066 | microtubule-associated protein tau                                  | 0 | 0 | 0 | 0 | 1 | 0 | 1 | 0 | hsa-miR-647 | -0.11 | N/A | Sites in UTR |
| RPS6KA2 | NM_001006932 | ribosomal protein S6 kinase, 90kDa, polypeptide 2                   | 0 | 0 | 0 | 0 | 1 | 0 | 1 | 0 | hsa-miR-647 | -0.11 | N/A | Sites in UTR |
| SLCO2A1 | NM_005630    | solute carrier organic anion transporter family, member 2A1         | 0 | 0 | 0 | 0 | 1 | 0 | 1 | 0 | hsa-miR-647 | -0.11 | N/A | Sites in UTR |

|         |              |                                                              |   |   |   |   |   |   |   |   |             |       |     |              |
|---------|--------------|--------------------------------------------------------------|---|---|---|---|---|---|---|---|-------------|-------|-----|--------------|
| KCTD2   | NM_015353    | potassium channel tetramerisation domain containing 2        | 0 | 0 | 0 | 0 | 1 | 0 | 1 | 0 | hsa-miR-647 | -0.11 | N/A | Sites in UTR |
| DPYSL5  | NM_020134    | dihydropyrimidinase-like 5                                   | 0 | 0 | 0 | 0 | 1 | 0 | 1 | 0 | hsa-miR-647 | -0.11 | N/A | Sites in UTR |
| FRMD1   | NM_001122841 | FERM domain containing 1                                     | 0 | 0 | 0 | 0 | 1 | 0 | 1 | 0 | hsa-miR-647 | -0.11 | N/A | Sites in UTR |
| CNIH3   | NM_152495    | cornichon homolog 3 (Drosophila)                             | 0 | 0 | 0 | 0 | 1 | 0 | 1 | 0 | hsa-miR-647 | -0.11 | N/A | Sites in UTR |
| GATAD2B | NM_020699    | GATA zinc finger domain containing 2B                        | 0 | 0 | 0 | 0 | 2 | 0 | 1 | 1 | hsa-miR-647 | -0.11 | N/A | Sites in UTR |
| PPM1D   | NM_003620    | protein phosphatase, Mg2+/Mn2+ dependent, 1D                 | 0 | 0 | 0 | 0 | 2 | 0 | 0 | 2 | hsa-miR-647 | -0.11 | N/A | Sites in UTR |
| ENTPD1  | NM_001098175 | ectonucleoside triphosphate diphosphohydrolase 1             | 0 | 0 | 0 | 0 | 3 | 0 | 1 | 2 | hsa-miR-647 | -0.11 | N/A | Sites in UTR |
| DCC     | NM_005215    | deleted in colorectal carcinoma                              | 0 | 0 | 0 | 0 | 2 | 0 | 1 | 1 | hsa-miR-647 | -0.11 | N/A | Sites in UTR |
| FGF9    | NM_002010    | fibroblast growth factor 9 (glia-activating factor)          | 0 | 0 | 0 | 0 | 1 | 0 | 0 | 1 | hsa-miR-647 | -0.11 | N/A | Sites in UTR |
| OSBP    | NM_002556    | oxysterol binding protein                                    | 0 | 0 | 0 | 0 | 1 | 0 | 0 | 1 | hsa-miR-647 | -0.11 | N/A | Sites in UTR |
| RAD9A   | NM_004584    | RAD9 homolog A (S. pombe)                                    | 0 | 0 | 0 | 0 | 1 | 0 | 0 | 1 | hsa-miR-647 | -0.11 | N/A | Sites in UTR |
| SLC5A5  | NM_000453    | solute carrier family 5 (sodium iodide symporter), member 5  | 0 | 0 | 0 | 0 | 1 | 0 | 0 | 1 | hsa-miR-647 | -0.11 | N/A | Sites in UTR |
| PCGF2   | NM_007144    | polycomb group ring finger 2                                 | 0 | 0 | 0 | 0 | 1 | 0 | 0 | 1 | hsa-miR-647 | -0.11 | N/A | Sites in UTR |
| ST8SIA5 | NM_013305    | ST8 alpha-N-acetyl-neuraminide alpha-2,8-sialyltransferase 5 | 0 | 0 | 0 | 0 | 1 | 0 | 0 | 1 | hsa-miR-647 | -0.11 | N/A | Sites in UTR |
| MED9    | NM_018019    | mediator complex subunit 9                                   | 0 | 0 | 0 | 0 | 1 | 0 | 0 | 1 | hsa-miR-647 | -0.11 | N/A | Sites in UTR |
| PDGFRB  | NM_002609    | platelet-derived growth factor receptor, beta polypeptide    | 0 | 0 | 0 | 0 | 1 | 0 | 1 | 0 | hsa-miR-647 | -0.11 | N/A | Sites in UTR |
| ZNF561  | NM_152289    | zinc finger protein 561                                      | 0 | 0 | 0 | 0 | 1 | 0 | 1 | 0 | hsa-miR-647 | -0.11 | N/A | Sites in UTR |
| LEMD2   | NM_001143944 | LEM domain containing 2                                      | 0 | 0 | 0 | 0 | 1 | 0 | 1 | 0 | hsa-miR-647 | -0.11 | N/A | Sites in UTR |

|         |              |                                                              |   |   |   |   |   |   |   |   |             |       |     |              |
|---------|--------------|--------------------------------------------------------------|---|---|---|---|---|---|---|---|-------------|-------|-----|--------------|
| RRP15   | NM_016052    | ribosomal RNA processing 15 homolog ( <i>S. cerevisiae</i> ) | 1 | 0 | 1 | 0 | 1 | 0 | 0 | 1 | hsa-miR-647 | -0.11 | N/A | Sites in UTR |
| PITPNM2 | NM_020845    | phosphatidylinositol transfer protein, membrane-associated 2 | 0 | 0 | 0 | 0 | 2 | 0 | 1 | 1 | hsa-miR-647 | -0.11 | N/A | Sites in UTR |
| MAN2A2  | NM_006122    | mannosidase, alpha, class 2A, member 2                       | 0 | 0 | 0 | 0 | 1 | 0 | 0 | 1 | hsa-miR-647 | -0.11 | N/A | Sites in UTR |
| UST     | NM_005715    | uronyl-2-sulfotransferase                                    | 0 | 0 | 0 | 0 | 1 | 0 | 0 | 1 | hsa-miR-647 | -0.11 | N/A | Sites in UTR |
| GPR132  | NM_013345    | G protein-coupled receptor 132                               | 0 | 0 | 0 | 0 | 1 | 0 | 0 | 1 | hsa-miR-647 | -0.11 | N/A | Sites in UTR |
| RBFOX1  | NM_001142333 | RNA binding protein, fox-1 homolog ( <i>C. elegans</i> ) 1   | 0 | 0 | 0 | 0 | 1 | 0 | 0 | 1 | hsa-miR-647 | -0.11 | N/A | Sites in UTR |
| STK40   | NM_032017    | serine/threonine kinase 40                                   | 0 | 0 | 0 | 0 | 1 | 0 | 0 | 1 | hsa-miR-647 | -0.11 | N/A | Sites in UTR |
| EDARADD | NM_080738    | EDAR-associated death domain                                 | 0 | 0 | 0 | 0 | 1 | 0 | 0 | 1 | hsa-miR-647 | -0.11 | N/A | Sites in UTR |
| ZNF783  | NM_001195220 | zinc finger family member 783                                | 0 | 0 | 0 | 0 | 1 | 0 | 0 | 1 | hsa-miR-647 | -0.11 | N/A | Sites in UTR |
| CD3EAP  | NM_012099    | CD3e molecule, epsilon associated protein                    | 0 | 0 | 0 | 0 | 1 | 0 | 1 | 0 | hsa-miR-647 | -0.11 | N/A | Sites in UTR |
| RNF44   | NM_014901    | ring finger protein 44                                       | 0 | 0 | 0 | 0 | 1 | 0 | 1 | 0 | hsa-miR-647 | -0.11 | N/A | Sites in UTR |
| ASCC1   | NM_001198798 | activating signal cointegrator 1 complex subunit 1           | 0 | 0 | 0 | 0 | 1 | 0 | 1 | 0 | hsa-miR-647 | -0.11 | N/A | Sites in UTR |
| DIRAS2  | NM_017594    | DIRAS family, GTP-binding RAS-like 2                         | 0 | 0 | 0 | 0 | 1 | 0 | 1 | 0 | hsa-miR-647 | -0.11 | N/A | Sites in UTR |
| PHC3    | NM_024947    | polyhomeotic homolog 3 ( <i>Drosophila</i> )                 | 0 | 0 | 0 | 0 | 1 | 0 | 1 | 0 | hsa-miR-647 | -0.11 | N/A | Sites in UTR |
| SCAMP4  | NM_079834    | secretory carrier membrane protein 4                         | 0 | 0 | 0 | 0 | 1 | 0 | 1 | 0 | hsa-miR-647 | -0.11 | N/A | Sites in UTR |
| GNG4    | NM_001098721 | guanine nucleotide binding protein (G protein), gamma 4      | 0 | 0 | 0 | 0 | 1 | 0 | 0 | 1 | hsa-miR-647 | -0.11 | N/A | Sites in UTR |
| M6PR    | NM_001207024 | mannose-6-phosphate receptor (cation dependent)              | 0 | 0 | 0 | 0 | 1 | 0 | 0 | 1 | hsa-miR-647 | -0.11 | N/A | Sites in UTR |
| LEMD3   | NM_001167614 | LEM domain containing 3                                      | 0 | 0 | 0 | 0 | 1 | 0 | 0 | 1 | hsa-miR-647 | -0.11 | N/A | Sites in UTR |

|          |              |                                                                            |   |   |   |   |   |   |   |   |             |       |     |              |
|----------|--------------|----------------------------------------------------------------------------|---|---|---|---|---|---|---|---|-------------|-------|-----|--------------|
| RMND5B   | NM_022762    | required for meiotic nuclear division 5 homolog B (S. cerevisiae)          | 0 | 0 | 0 | 0 | 1 | 0 | 0 | 1 | hsa-miR-647 | -0.11 | N/A | Sites in UTR |
| TEX19    | NM_207459    | testis expressed 19                                                        | 0 | 0 | 0 | 0 | 1 | 0 | 0 | 1 | hsa-miR-647 | -0.11 | N/A | Sites in UTR |
| ELF4     | NM_001127197 | E74-like factor 4 (ets domain transcription factor)                        | 0 | 0 | 0 | 0 | 1 | 0 | 1 | 0 | hsa-miR-647 | -0.11 | N/A | Sites in UTR |
| IHH      | NM_002181    | Indian hedgehog                                                            | 0 | 0 | 0 | 0 | 1 | 0 | 1 | 0 | hsa-miR-647 | -0.11 | N/A | Sites in UTR |
| ANKRD13B | NM_152345    | ankyrin repeat domain 13B                                                  | 0 | 0 | 0 | 0 | 1 | 0 | 1 | 0 | hsa-miR-647 | -0.11 | N/A | Sites in UTR |
| ZNF655   | NM_001009960 | zinc finger protein 655                                                    | 0 | 0 | 0 | 0 | 1 | 1 | 0 | 0 | hsa-miR-647 | -0.11 | N/A | Sites in UTR |
| IL1R1    | NM_000877    | interleukin 1 receptor, type I                                             | 0 | 0 | 0 | 0 | 1 | 0 | 0 | 1 | hsa-miR-647 | -0.1  | N/A | Sites in UTR |
| P2RX1    | NM_002558    | purinergic receptor P2X, ligand-gated ion channel, 1                       | 0 | 0 | 0 | 0 | 1 | 0 | 0 | 1 | hsa-miR-647 | -0.1  | N/A | Sites in UTR |
| SDC1     | NM_001006946 | syndecan 1                                                                 | 0 | 0 | 0 | 0 | 1 | 0 | 0 | 1 | hsa-miR-647 | -0.1  | N/A | Sites in UTR |
| PTGES    | NM_004878    | prostaglandin E synthase                                                   | 0 | 0 | 0 | 0 | 1 | 0 | 0 | 1 | hsa-miR-647 | -0.1  | N/A | Sites in UTR |
| RPIA     | NM_144563    | ribose 5-phosphate isomerase A                                             | 0 | 0 | 0 | 0 | 1 | 0 | 0 | 1 | hsa-miR-647 | -0.1  | N/A | Sites in UTR |
| ATG2A    | NM_015104    | ATG2 autophagy related 2 homolog A (S. cerevisiae)                         | 1 | 0 | 0 | 1 | 0 | 0 | 0 | 0 | hsa-miR-647 | -0.1  | N/A | Sites in UTR |
| TMEM39B  | NM_018056    | transmembrane protein 39B                                                  | 0 | 0 | 0 | 0 | 1 | 0 | 0 | 1 | hsa-miR-647 | -0.1  | N/A | Sites in UTR |
| SLC10A7  | NM_001029998 | solute carrier family 10 (sodium/bile acid cotransporter family), member 7 | 0 | 0 | 0 | 0 | 1 | 0 | 0 | 1 | hsa-miR-647 | -0.1  | N/A | Sites in UTR |
| ZMYND17  | NM_001024593 | zinc finger, MYND-type containing 17                                       | 0 | 0 | 0 | 0 | 1 | 0 | 0 | 1 | hsa-miR-647 | -0.1  | N/A | Sites in UTR |
| MAGEA5   | NM_021049    | melanoma antigen family A, 5                                               | 0 | 0 | 0 | 0 | 1 | 0 | 1 | 0 | hsa-miR-647 | -0.1  | N/A | Sites in UTR |
| MKL1     | NM_020831    | megakaryoblastic leukemia (translocation) 1                                | 0 | 0 | 0 | 0 | 1 | 0 | 1 | 0 | hsa-miR-647 | -0.1  | N/A | Sites in UTR |
| CCDC120  | NM_001163321 | coiled-coil domain containing 120                                          | 1 | 0 | 1 | 0 | 0 | 0 | 0 | 0 | hsa-miR-647 | -0.1  | N/A | Sites in UTR |



|                |              |                                                                                                                  |   |   |   |   |   |   |   |   |             |      |     |              |
|----------------|--------------|------------------------------------------------------------------------------------------------------------------|---|---|---|---|---|---|---|---|-------------|------|-----|--------------|
| UBN2           | NM_173569    | ubiquitin 2                                                                                                      | 0 | 0 | 0 | 0 | 1 | 0 | 1 | 0 | hsa-miR-647 | -0.1 | N/A | Sites in UTR |
| MAGEA10-MAGEA5 | NM_001204811 | MAGEA10-MAGEA5 readthrough                                                                                       | 0 | 0 | 0 | 0 | 1 | 0 | 1 | 0 | hsa-miR-647 | -0.1 | N/A | Sites in UTR |
| CYP1B1         | NM_000104    | cytochrome P450, family 1, subfamily B, polypeptide 1                                                            | 0 | 0 | 0 | 0 | 1 | 0 | 0 | 1 | hsa-miR-647 | -0.1 | N/A | Sites in UTR |
| HK2            | NM_000189    | hexokinase 2                                                                                                     | 0 | 0 | 0 | 0 | 1 | 0 | 0 | 1 | hsa-miR-647 | -0.1 | N/A | Sites in UTR |
| ST5            | NM_005418    | suppression of tumorigenicity 5                                                                                  | 0 | 0 | 0 | 0 | 1 | 0 | 0 | 1 | hsa-miR-647 | -0.1 | N/A | Sites in UTR |
| NAPA           | NM_003827    | N-ethylmaleimide-sensitive factor attachment protein, alpha                                                      | 0 | 0 | 0 | 0 | 1 | 0 | 0 | 1 | hsa-miR-647 | -0.1 | N/A | Sites in UTR |
| NUMBL          | NM_004756    | numb homolog (Drosophila)-like                                                                                   | 1 | 0 | 0 | 1 | 0 | 0 | 0 | 0 | hsa-miR-647 | -0.1 | N/A | Sites in UTR |
| ADAMTS3        | NM_014243    | ADAM metallopeptidase with thrombospondin type 1 motif, 3                                                        | 0 | 0 | 0 | 0 | 1 | 0 | 0 | 1 | hsa-miR-647 | -0.1 | N/A | Sites in UTR |
| BTNL3          | NM_197975    | butyrophilin-like 3                                                                                              | 0 | 0 | 0 | 0 | 1 | 0 | 0 | 1 | hsa-miR-647 | -0.1 | N/A | Sites in UTR |
| WWP2           | NM_007014    | WW domain containing E3 ubiquitin protein ligase 2                                                               | 0 | 0 | 0 | 0 | 1 | 0 | 0 | 1 | hsa-miR-647 | -0.1 | N/A | Sites in UTR |
| SEMA4G         | NM_017893    | sema domain, immunoglobulin domain (Ig), transmembrane domain (TM) and short cytoplasmic domain, (semaphorin) 4G | 0 | 0 | 0 | 0 | 1 | 0 | 0 | 1 | hsa-miR-647 | -0.1 | N/A | Sites in UTR |
| PRR3           | NM_001077497 | proline rich 3                                                                                                   | 0 | 0 | 0 | 0 | 1 | 0 | 0 | 1 | hsa-miR-647 | -0.1 | N/A | Sites in UTR |
| TMPRSS5        | NM_030770    | transmembrane protease, serine 5                                                                                 | 0 | 0 | 0 | 0 | 1 | 0 | 0 | 1 | hsa-miR-647 | -0.1 | N/A | Sites in UTR |
| KCNJ10         | NM_002241    | potassium inwardly-rectifying channel, subfamily J, member 10                                                    | 0 | 0 | 0 | 0 | 3 | 0 | 2 | 1 | hsa-miR-647 | -0.1 | N/A | Sites in UTR |
| LIFR           | NM_001127671 | leukemia inhibitory factor receptor alpha                                                                        | 0 | 0 | 0 | 0 | 1 | 0 | 1 | 0 | hsa-miR-647 | -0.1 | N/A | Sites in UTR |
| RANBP3         | NM_003624    | RAN binding protein 3                                                                                            | 0 | 0 | 0 | 0 | 1 | 0 | 1 | 0 | hsa-miR-647 | -0.1 | N/A | Sites in UTR |
| FAF2           | NM_014613    | Fas associated factor family member 2                                                                            | 0 | 0 | 0 | 0 | 1 | 0 | 1 | 0 | hsa-miR-647 | -0.1 | N/A | Sites in UTR |
| SIDT1          | NM_017699    | SID1 transmembrane family, member 1                                                                              | 0 | 0 | 0 | 0 | 1 | 0 | 1 | 0 | hsa-miR-647 | -0.1 | N/A | Sites in UTR |

|         |              |                                                               |   |   |   |   |   |   |   |   |             |      |     |              |
|---------|--------------|---------------------------------------------------------------|---|---|---|---|---|---|---|---|-------------|------|-----|--------------|
| NSFL1C  | NM_001206736 | NSFL1 (p97) cofactor (p47)                                    | 0 | 0 | 0 | 0 | 1 | 0 | 1 | 0 | hsa-miR-647 | -0.1 | N/A | Sites in UTR |
| ENGASE  | NM_001042573 | endo-beta-N-acetylglucosaminidase                             | 0 | 0 | 0 | 0 | 1 | 0 | 1 | 0 | hsa-miR-647 | -0.1 | N/A | Sites in UTR |
| SIRPB2  | NM_001122962 | signal-regulatory protein beta 2                              | 0 | 0 | 0 | 0 | 1 | 0 | 1 | 0 | hsa-miR-647 | -0.1 | N/A | Sites in UTR |
| CDH6    | NM_004932    | cadherin 6, type 2, K-cadherin (fetal kidney)                 | 0 | 0 | 0 | 0 | 1 | 0 | 0 | 1 | hsa-miR-647 | -0.1 | N/A | Sites in UTR |
| DOCK1   | NM_001380    | dedicator of cytokinesis 1                                    | 0 | 0 | 0 | 0 | 1 | 0 | 0 | 1 | hsa-miR-647 | -0.1 | N/A | Sites in UTR |
| EPHA3   | NM_005233    | EPH receptor A3                                               | 0 | 0 | 0 | 0 | 1 | 0 | 0 | 1 | hsa-miR-647 | -0.1 | N/A | Sites in UTR |
| PSPH    | NM_004577    | phosphoserine phosphatase                                     | 0 | 0 | 0 | 0 | 1 | 0 | 0 | 1 | hsa-miR-647 | -0.1 | N/A | Sites in UTR |
| THBS3   | NM_007112    | thrombospondin 3                                              | 0 | 0 | 0 | 0 | 1 | 0 | 0 | 1 | hsa-miR-647 | -0.1 | N/A | Sites in UTR |
| ZNF155  | NM_003445    | zinc finger protein 155                                       | 0 | 0 | 0 | 0 | 1 | 0 | 0 | 1 | hsa-miR-647 | -0.1 | N/A | Sites in UTR |
| NSD1    | NM_022455    | nuclear receptor binding SET domain protein 1                 | 0 | 0 | 0 | 0 | 1 | 0 | 0 | 1 | hsa-miR-647 | -0.1 | N/A | Sites in UTR |
| TMEM109 | NM_024092    | transmembrane protein 109                                     | 0 | 0 | 0 | 0 | 1 | 0 | 0 | 1 | hsa-miR-647 | -0.1 | N/A | Sites in UTR |
| ERLIN1  | NM_001100626 | ER lipid raft associated 1                                    | 0 | 0 | 0 | 0 | 1 | 0 | 1 | 0 | hsa-miR-647 | -0.1 | N/A | Sites in UTR |
| GJC2    | NM_020435    | gap junction protein, gamma 2, 47kDa                          | 0 | 0 | 0 | 0 | 1 | 0 | 1 | 0 | hsa-miR-647 | -0.1 | N/A | Sites in UTR |
| GLT1D1  | NM_144669    | glycosyltransferase 1 domain containing 1                     | 0 | 0 | 0 | 0 | 1 | 0 | 1 | 0 | hsa-miR-647 | -0.1 | N/A | Sites in UTR |
| KCNQ5   | NM_001160130 | potassium voltage-gated channel, KQT-like subfamily, member 5 | 0 | 0 | 0 | 0 | 2 | 1 | 0 | 1 | hsa-miR-647 | -0.1 | N/A | Sites in UTR |
| CASQ2   | NM_001232    | calsequestrin 2 (cardiac muscle)                              | 0 | 0 | 0 | 0 | 1 | 0 | 0 | 1 | hsa-miR-647 | -0.1 | N/A | Sites in UTR |
| SRL     | NM_001098814 | sarcalumenin                                                  | 0 | 0 | 0 | 0 | 1 | 0 | 0 | 1 | hsa-miR-647 | -0.1 | N/A | Sites in UTR |
| SYN3    | NM_001135774 | synapsin III                                                  | 0 | 0 | 0 | 0 | 1 | 0 | 0 | 1 | hsa-miR-647 | -0.1 | N/A | Sites in UTR |

|                |              |                                                        |   |   |   |   |   |   |   |   |             |      |     |              |
|----------------|--------------|--------------------------------------------------------|---|---|---|---|---|---|---|---|-------------|------|-----|--------------|
| GIPC1          | NM_005716    | GIPC PDZ domain containing family, member 1            | 0 | 0 | 0 | 0 | 1 | 0 | 0 | 1 | hsa-miR-647 | -0.1 | N/A | Sites in UTR |
| COG4           | NM_001195139 | component of oligomeric golgi complex 4                | 0 | 0 | 0 | 0 | 1 | 0 | 0 | 1 | hsa-miR-647 | -0.1 | N/A | Sites in UTR |
| FAM127B        | NM_001078172 | family with sequence similarity 127, member B          | 0 | 0 | 0 | 0 | 1 | 0 | 0 | 1 | hsa-miR-647 | -0.1 | N/A | Sites in UTR |
| CARKD          | NM_001242881 | carbohydrate kinase domain containing                  | 0 | 0 | 0 | 0 | 1 | 0 | 0 | 1 | hsa-miR-647 | -0.1 | N/A | Sites in UTR |
| AARS2          | NM_020745    | alanyl-tRNA synthetase 2, mitochondrial (putative)     | 0 | 0 | 0 | 0 | 1 | 0 | 0 | 1 | hsa-miR-647 | -0.1 | N/A | Sites in UTR |
| GPI            | NM_000175    | glucose-6-phosphate isomerase                          | 0 | 0 | 0 | 0 | 1 | 0 | 1 | 0 | hsa-miR-647 | -0.1 | N/A | Sites in UTR |
| GIT1           | NM_001085454 | G protein-coupled receptor kinase interacting ArfGAP 1 | 1 | 0 | 1 | 0 | 0 | 0 | 0 | 0 | hsa-miR-647 | -0.1 | N/A | Sites in UTR |
| ZNF71          | NM_021216    | zinc finger protein 71                                 | 0 | 0 | 0 | 0 | 1 | 0 | 1 | 0 | hsa-miR-647 | -0.1 | N/A | Sites in UTR |
| SYT11          | NM_152280    | synaptotagmin XI                                       | 0 | 0 | 0 | 0 | 1 | 0 | 0 | 1 | hsa-miR-647 | -0.1 | N/A | Sites in UTR |
| ASAP3          | NM_001143778 | ArfGAP with SH3 domain, ankyrin repeat and PH domain 3 | 0 | 0 | 0 | 0 | 1 | 0 | 0 | 1 | hsa-miR-647 | -0.1 | N/A | Sites in UTR |
| GCOM1          | NM_001018100 | GRINL1A complex locus                                  | 0 | 0 | 0 | 0 | 1 | 0 | 0 | 1 | hsa-miR-647 | -0.1 | N/A | Sites in UTR |
| MUSTN1         | NM_205853    | musculoskeletal, embryonic nuclear protein 1           | 0 | 0 | 0 | 0 | 1 | 0 | 0 | 1 | hsa-miR-647 | -0.1 | N/A | Sites in UTR |
| TMEM110-MUSTN1 | NM_001198974 | TMEM110-MUSTN1 readthrough                             | 0 | 0 | 0 | 0 | 1 | 0 | 0 | 1 | hsa-miR-647 | -0.1 | N/A | Sites in UTR |
| VAV2           | NM_001134398 | vav 2 guanine nucleotide exchange factor               | 0 | 0 | 0 | 0 | 1 | 0 | 1 | 0 | hsa-miR-647 | -0.1 | N/A | Sites in UTR |
| RECQL5         | NM_001003716 | RecQ protein-like 5                                    | 0 | 0 | 0 | 0 | 1 | 0 | 1 | 0 | hsa-miR-647 | -0.1 | N/A | Sites in UTR |
| TRIOBP         | NM_001039141 | TRIO and F-actin binding protein                       | 0 | 0 | 0 | 0 | 1 | 0 | 1 | 0 | hsa-miR-647 | -0.1 | N/A | Sites in UTR |
| C12orf34       | NM_032829    | chromosome 12 open reading frame 34                    | 0 | 0 | 0 | 0 | 1 | 0 | 1 | 0 | hsa-miR-647 | -0.1 | N/A | Sites in UTR |
| TNS4           | NM_032865    | tensin 4                                               | 0 | 0 | 0 | 0 | 1 | 0 | 1 | 0 | hsa-miR-647 | -0.1 | N/A | Sites in UTR |

|         |              |                                                                                       |   |   |   |   |   |   |   |   |             |      |     |              |
|---------|--------------|---------------------------------------------------------------------------------------|---|---|---|---|---|---|---|---|-------------|------|-----|--------------|
| GEN1    | NM_001130009 | Gen homolog 1, endonuclease ( <i>Drosophila</i> )                                     | 0 | 0 | 0 | 0 | 1 | 0 | 1 | 0 | hsa-miR-647 | -0.1 | N/A | Sites in UTR |
| SLC22A3 | NM_021977    | solute carrier family 22 (extraneuronal monoamine transporter), member 3              | 1 | 0 | 0 | 1 | 1 | 0 | 0 | 1 | hsa-miR-647 | -0.1 | N/A | Sites in UTR |
| CELSR1  | NM_014246    | cadherin, EGF LAG seven-pass G-type receptor 1 (flamingo homolog, <i>Drosophila</i> ) | 0 | 0 | 0 | 0 | 1 | 0 | 0 | 1 | hsa-miR-647 | -0.1 | N/A | Sites in UTR |
| KLHDC10 | NM_014997    | kelch domain containing 10                                                            | 0 | 0 | 0 | 0 | 1 | 0 | 0 | 1 | hsa-miR-647 | -0.1 | N/A | Sites in UTR |
| ZNF317  | NM_001190791 | zinc finger protein 317                                                               | 0 | 0 | 0 | 0 | 1 | 0 | 0 | 1 | hsa-miR-647 | -0.1 | N/A | Sites in UTR |
| ZNF100  | NM_173531    | zinc finger protein 100                                                               | 0 | 0 | 0 | 0 | 1 | 0 | 0 | 1 | hsa-miR-647 | -0.1 | N/A | Sites in UTR |
| CDHR3   | NM_152750    | cadherin-related family member 3                                                      | 0 | 0 | 0 | 0 | 1 | 0 | 0 | 1 | hsa-miR-647 | -0.1 | N/A | Sites in UTR |
| METTL10 | NM_212554    | methyltransferase like 10                                                             | 0 | 0 | 0 | 0 | 1 | 0 | 0 | 1 | hsa-miR-647 | -0.1 | N/A | Sites in UTR |
| ACCN1   | NM_001094    | amiloride-sensitive cation channel 1, neuronal                                        | 0 | 0 | 0 | 0 | 1 | 0 | 1 | 0 | hsa-miR-647 | -0.1 | N/A | Sites in UTR |
| CRIP2   | NM_001312    | cysteine-rich protein 2                                                               | 0 | 0 | 0 | 0 | 1 | 0 | 1 | 0 | hsa-miR-647 | -0.1 | N/A | Sites in UTR |
| NFIC    | NM_005597    | nuclear factor I/C (CCAAT-binding transcription factor)                               | 0 | 0 | 0 | 0 | 1 | 0 | 1 | 0 | hsa-miR-647 | -0.1 | N/A | Sites in UTR |
| SOX11   | NM_003108    | SRY (sex determining region Y)-box 11                                                 | 0 | 0 | 0 | 0 | 1 | 0 | 1 | 0 | hsa-miR-647 | -0.1 | N/A | Sites in UTR |
| TSPAN9  | NM_001168320 | tetraspanin 9                                                                         | 0 | 0 | 0 | 0 | 1 | 0 | 1 | 0 | hsa-miR-647 | -0.1 | N/A | Sites in UTR |
| BAHD1   | NM_014952    | bromo adjacent homology domain containing 1                                           | 0 | 0 | 0 | 0 | 1 | 0 | 1 | 0 | hsa-miR-647 | -0.1 | N/A | Sites in UTR |
| BARHL1  | NM_020064    | BarH-like homeobox 1                                                                  | 0 | 0 | 0 | 0 | 1 | 0 | 1 | 0 | hsa-miR-647 | -0.1 | N/A | Sites in UTR |
| DNAJC18 | NM_152686    | DnaJ (Hsp40) homolog, subfamily C, member 18                                          | 0 | 0 | 0 | 0 | 1 | 0 | 1 | 0 | hsa-miR-647 | -0.1 | N/A | Sites in UTR |
| PRR18   | NM_175922    | proline rich 18                                                                       | 0 | 0 | 0 | 0 | 1 | 0 | 1 | 0 | hsa-miR-647 | -0.1 | N/A | Sites in UTR |
| FECH    | NM_000140    | ferrochelatase                                                                        | 0 | 0 | 0 | 0 | 3 | 0 | 1 | 2 | hsa-miR-647 | -0.1 | N/A | Sites in UTR |

|           |              |                                                                                                                  |   |   |   |   |   |   |   |   |             |      |     |              |
|-----------|--------------|------------------------------------------------------------------------------------------------------------------|---|---|---|---|---|---|---|---|-------------|------|-----|--------------|
| NOS1      | NM_000620    | nitric oxide synthase 1 (neuronal)                                                                               | 0 | 0 | 0 | 0 | 2 | 1 | 0 | 1 | hsa-miR-647 | -0.1 | N/A | Sites in UTR |
| PCSK1     | NM_000439    | proprotein convertase subtilisin/kexin type 1                                                                    | 0 | 0 | 0 | 0 | 1 | 0 | 0 | 1 | hsa-miR-647 | -0.1 | N/A | Sites in UTR |
| SEMA4D    | NM_001142287 | sema domain, immunoglobulin domain (Ig), transmembrane domain (TM) and short cytoplasmic domain, (semaphorin) 4D | 0 | 0 | 0 | 0 | 1 | 0 | 0 | 1 | hsa-miR-647 | -0.1 | N/A | Sites in UTR |
| RPRD2     | NM_015203    | regulation of nuclear pre-mRNA domain containing 2                                                               | 0 | 0 | 0 | 0 | 1 | 0 | 0 | 1 | hsa-miR-647 | -0.1 | N/A | Sites in UTR |
| TMEM164   | NM_017698    | transmembrane protein 164                                                                                        | 0 | 0 | 0 | 0 | 1 | 0 | 0 | 1 | hsa-miR-647 | -0.1 | N/A | Sites in UTR |
| TM4SF18   | NM_001184723 | transmembrane 4 L six family member 18                                                                           | 0 | 0 | 0 | 0 | 1 | 0 | 0 | 1 | hsa-miR-647 | -0.1 | N/A | Sites in UTR |
| USH1G     | NM_173477    | Usher syndrome 1G (autosomal recessive)                                                                          | 1 | 0 | 0 | 1 | 0 | 0 | 0 | 0 | hsa-miR-647 | -0.1 | N/A | Sites in UTR |
| PLAC4     | NM_182832    | placenta-specific 4                                                                                              | 0 | 0 | 0 | 0 | 2 | 0 | 1 | 1 | hsa-miR-647 | -0.1 | N/A | Sites in UTR |
| DLG3      | NM_001166278 | discs, large homolog 3 (Drosophila)                                                                              | 0 | 0 | 0 | 0 | 1 | 0 | 1 | 0 | hsa-miR-647 | -0.1 | N/A | Sites in UTR |
| TUB       | NM_003320    | tubby homolog (mouse)                                                                                            | 0 | 0 | 0 | 0 | 2 | 0 | 0 | 2 | hsa-miR-647 | -0.1 | N/A | Sites in UTR |
| TRIM25    | NM_005082    | tripartite motif containing 25                                                                                   | 0 | 0 | 0 | 0 | 1 | 0 | 1 | 0 | hsa-miR-647 | -0.1 | N/A | Sites in UTR |
| THUMPD1   | NM_017736    | THUMP domain containing 1                                                                                        | 0 | 0 | 0 | 0 | 1 | 0 | 1 | 0 | hsa-miR-647 | -0.1 | N/A | Sites in UTR |
| PLEKHO2   | NM_001195059 | pleckstrin homology domain containing, family O member 2                                                         | 0 | 0 | 0 | 0 | 1 | 0 | 1 | 0 | hsa-miR-647 | -0.1 | N/A | Sites in UTR |
| MOBKL2A   | NM_130807    | MOB1, Mps One Binder kinase activator-like 2A (yeast)                                                            | 0 | 0 | 0 | 0 | 1 | 0 | 1 | 0 | hsa-miR-647 | -0.1 | N/A | Sites in UTR |
| IL17RA    | NM_014339    | interleukin 17 receptor A                                                                                        | 0 | 0 | 0 | 0 | 2 | 0 | 2 | 0 | hsa-miR-647 | -0.1 | N/A | Sites in UTR |
| TNFRSF10C | NM_003841    | tumor necrosis factor receptor superfamily, member 10c, decoy without an intracellular domain                    | 0 | 0 | 0 | 0 | 1 | 0 | 0 | 1 | hsa-miR-647 | -0.1 | N/A | Sites in UTR |
| GUF1      | NM_021927    | GUF1 GTPase homolog (S. cerevisiae)                                                                              | 0 | 0 | 0 | 0 | 1 | 0 | 0 | 1 | hsa-miR-647 | -0.1 | N/A | Sites in UTR |
| C1QTNF7   | NM_001135170 | C1q and tumor necrosis factor related protein 7                                                                  | 0 | 0 | 0 | 0 | 1 | 0 | 0 | 1 | hsa-miR-647 | -0.1 | N/A | Sites in UTR |

|          |              |                                                                            |   |   |   |   |   |   |   |   |             |      |     |              |
|----------|--------------|----------------------------------------------------------------------------|---|---|---|---|---|---|---|---|-------------|------|-----|--------------|
| SGSM1    | NM_001039948 | small G protein signaling modulator 1                                      | 0 | 0 | 0 | 0 | 1 | 0 | 0 | 1 | hsa-miR-647 | -0.1 | N/A | Sites in UTR |
| KBTBD5   | NM_152393    | kelch repeat and BTB (POZ) domain containing 5                             | 0 | 0 | 0 | 0 | 1 | 0 | 0 | 1 | hsa-miR-647 | -0.1 | N/A | Sites in UTR |
| TMEM37   | NM_183240    | transmembrane protein 37                                                   | 0 | 0 | 0 | 0 | 1 | 0 | 0 | 1 | hsa-miR-647 | -0.1 | N/A | Sites in UTR |
| MBD3     | NM_003926    | methyl-CpG binding domain protein 3                                        | 0 | 0 | 0 | 0 | 1 | 0 | 1 | 0 | hsa-miR-647 | -0.1 | N/A | Sites in UTR |
| MACROD2  | NM_001033087 | MACRO domain containing 2                                                  | 0 | 0 | 0 | 0 | 1 | 0 | 1 | 0 | hsa-miR-647 | -0.1 | N/A | Sites in UTR |
| DCLK2    | NM_001040260 | doublecortin-like kinase 2                                                 | 0 | 0 | 0 | 0 | 1 | 0 | 1 | 0 | hsa-miR-647 | -0.1 | N/A | Sites in UTR |
| CACNA1A  | NM_000068    | calcium channel, voltage-dependent, P/Q type, alpha 1A subunit             | 0 | 0 | 0 | 0 | 2 | 0 | 1 | 1 | hsa-miR-647 | -0.1 | N/A | Sites in UTR |
| ADAM8    | NM_001109    | ADAM metallopeptidase domain 8                                             | 0 | 0 | 0 | 0 | 1 | 0 | 0 | 1 | hsa-miR-647 | -0.1 | N/A | Sites in UTR |
| ALDH3B1  | NM_000694    | aldehyde dehydrogenase 3 family, member B1                                 | 0 | 0 | 0 | 0 | 1 | 0 | 0 | 1 | hsa-miR-647 | -0.1 | N/A | Sites in UTR |
| IGF2R    | NM_000876    | insulin-like growth factor 2 receptor                                      | 0 | 0 | 0 | 0 | 1 | 0 | 0 | 1 | hsa-miR-647 | -0.1 | N/A | Sites in UTR |
| MLL      | NM_001197104 | myeloid/lymphoid or mixed-lineage leukemia (trithorax homolog, Drosophila) | 0 | 0 | 0 | 0 | 1 | 0 | 0 | 1 | hsa-miR-647 | -0.1 | N/A | Sites in UTR |
| SYNE1    | NM_033071    | spectrin repeat containing, nuclear envelope 1                             | 0 | 0 | 0 | 0 | 1 | 0 | 0 | 1 | hsa-miR-647 | -0.1 | N/A | Sites in UTR |
| ZNF514   | NM_032788    | zinc finger protein 514                                                    | 0 | 0 | 0 | 0 | 1 | 0 | 0 | 1 | hsa-miR-647 | -0.1 | N/A | Sites in UTR |
| ATP6V1C2 | NM_001039362 | ATPase, H+ transporting, lysosomal 42kDa, V1 subunit C2                    | 0 | 0 | 0 | 0 | 1 | 0 | 0 | 1 | hsa-miR-647 | -0.1 | N/A | Sites in UTR |
| RAPGEF1  | NM_005312    | Rap guanine nucleotide exchange factor (GEF) 1                             | 0 | 0 | 0 | 0 | 1 | 0 | 1 | 0 | hsa-miR-647 | -0.1 | N/A | Sites in UTR |
| FAM19A5  | NM_001082967 | family with sequence similarity 19 (chemokine (C-C motif)-like), member A5 | 0 | 0 | 0 | 0 | 1 | 0 | 1 | 0 | hsa-miR-647 | -0.1 | N/A | Sites in UTR |
| CABLES2  | NM_031215    | Cdk5 and Abl enzyme substrate 2                                            | 0 | 0 | 0 | 0 | 1 | 0 | 1 | 0 | hsa-miR-647 | -0.1 | N/A | Sites in UTR |
| KCNAB2   | NM_001199860 | potassium voltage-gated channel, shaker-related subfamily, beta member 2   | 0 | 0 | 0 | 0 | 1 | 0 | 0 | 1 | hsa-miR-647 | -0.1 | N/A | Sites in UTR |

|          |              |                                                                 |   |   |   |   |   |   |   |   |             |      |     |              |
|----------|--------------|-----------------------------------------------------------------|---|---|---|---|---|---|---|---|-------------|------|-----|--------------|
| TBC1D10B | NM_015527    | TBC1 domain family, member 10B                                  | 0 | 0 | 0 | 0 | 1 | 0 | 0 | 1 | hsa-miR-647 | -0.1 | N/A | Sites in UTR |
| LTN1     | NM_015565    | listerin E3 ubiquitin protein ligase 1                          | 0 | 0 | 0 | 0 | 1 | 0 | 0 | 1 | hsa-miR-647 | -0.1 | N/A | Sites in UTR |
| THAP3    | NM_138350    | THAP domain containing, apoptosis associated protein 3          | 0 | 0 | 0 | 0 | 1 | 0 | 0 | 1 | hsa-miR-647 | -0.1 | N/A | Sites in UTR |
| BTBD11   | NM_001017523 | BTB (POZ) domain containing 11                                  | 0 | 0 | 0 | 0 | 1 | 0 | 0 | 1 | hsa-miR-647 | -0.1 | N/A | Sites in UTR |
| GOLGA6L9 | NM_198181    | golgin A6 family-like 9                                         | 0 | 0 | 0 | 0 | 1 | 0 | 0 | 1 | hsa-miR-647 | -0.1 | N/A | Sites in UTR |
| GJA3     | NM_021954    | gap junction protein, alpha 3, 46kDa                            | 0 | 0 | 0 | 0 | 1 | 0 | 1 | 0 | hsa-miR-647 | -0.1 | N/A | Sites in UTR |
| KCNJ12   | NM_021012    | potassium inwardly-rectifying channel, subfamily J, member 12   | 0 | 0 | 0 | 0 | 1 | 0 | 1 | 0 | hsa-miR-647 | -0.1 | N/A | Sites in UTR |
| ACTR1B   | NM_005735    | ARP1 actin-related protein 1 homolog B, centractin beta (yeast) | 0 | 0 | 0 | 0 | 1 | 0 | 1 | 0 | hsa-miR-647 | -0.1 | N/A | Sites in UTR |
| PHF19    | NM_015651    | PHD finger protein 19                                           | 0 | 0 | 0 | 0 | 1 | 0 | 1 | 0 | hsa-miR-647 | -0.1 | N/A | Sites in UTR |
| CCDC93   | NM_019044    | coiled-coil domain containing 93                                | 0 | 0 | 0 | 0 | 1 | 0 | 1 | 0 | hsa-miR-647 | -0.1 | N/A | Sites in UTR |
| C2orf18  | NM_017877    | chromosome 2 open reading frame 18                              | 0 | 0 | 0 | 0 | 1 | 0 | 1 | 0 | hsa-miR-647 | -0.1 | N/A | Sites in UTR |
| NDRG4    | NM_001130487 | NDRG family member 4                                            | 0 | 0 | 0 | 0 | 1 | 0 | 1 | 0 | hsa-miR-647 | -0.1 | N/A | Sites in UTR |
| SAMD14   | NM_174920    | sterile alpha motif domain containing 14                        | 0 | 0 | 0 | 0 | 1 | 0 | 1 | 0 | hsa-miR-647 | -0.1 | N/A | Sites in UTR |
| KCNJ18   | NM_001194958 | potassium inwardly-rectifying channel, subfamily J, member 18   | 0 | 0 | 0 | 0 | 1 | 0 | 1 | 0 | hsa-miR-647 | -0.1 | N/A | Sites in UTR |
| GPC4     | NM_001448    | glypican 4                                                      | 0 | 0 | 0 | 0 | 1 | 0 | 0 | 1 | hsa-miR-647 | -0.1 | N/A | Sites in UTR |
| MTOR     | NM_004958    | mechanistic target of rapamycin (serine/threonine kinase)       | 0 | 0 | 0 | 0 | 1 | 0 | 0 | 1 | hsa-miR-647 | -0.1 | N/A | Sites in UTR |
| GABRP    | NM_014211    | gamma-aminobutyric acid (GABA) A receptor, pi                   | 0 | 0 | 0 | 0 | 1 | 0 | 0 | 1 | hsa-miR-647 | -0.1 | N/A | Sites in UTR |
| TMEM64   | NM_001008495 | transmembrane protein 64                                        | 0 | 0 | 0 | 0 | 1 | 0 | 0 | 1 | hsa-miR-647 | -0.1 | N/A | Sites in UTR |

|           |              |                                                                           |   |   |   |   |   |   |   |   |             |       |     |              |
|-----------|--------------|---------------------------------------------------------------------------|---|---|---|---|---|---|---|---|-------------|-------|-----|--------------|
| C2orf68   | NM_001013649 | chromosome 2 open reading frame 68                                        | 0 | 0 | 0 | 0 | 1 | 0 | 0 | 1 | hsa-miR-647 | -0.1  | N/A | Sites in UTR |
| C20orf112 | NM_080616    | chromosome 20 open reading frame 112                                      | 0 | 0 | 0 | 0 | 1 | 1 | 0 | 0 | hsa-miR-647 | -0.1  | N/A | Sites in UTR |
| SSX2IP    | NM_001166293 | synovial sarcoma, X breakpoint 2 interacting protein                      | 0 | 0 | 0 | 0 | 1 | 0 | 1 | 0 | hsa-miR-647 | -0.1  | N/A | Sites in UTR |
| C5orf63   | NM_001164479 | chromosome 5 open reading frame 63                                        | 0 | 0 | 0 | 0 | 1 | 0 | 1 | 0 | hsa-miR-647 | -0.1  | N/A | Sites in UTR |
| LHFPL4    | NM_198560    | lipoma HMGIC fusion partner-like 4                                        | 0 | 0 | 0 | 0 | 2 | 1 | 1 | 0 | hsa-miR-647 | -0.09 | N/A | Sites in UTR |
| ELF3      | NM_001114309 | E74-like factor 3 (ets domain transcription factor, epithelial-specific ) | 0 | 0 | 0 | 0 | 1 | 0 | 0 | 1 | hsa-miR-647 | -0.09 | N/A | Sites in UTR |
| FZD4      | NM_012193    | frizzled family receptor 4                                                | 0 | 0 | 0 | 0 | 1 | 0 | 0 | 1 | hsa-miR-647 | -0.09 | N/A | Sites in UTR |
| TNFRSF25  | NM_003790    | tumor necrosis factor receptor superfamily, member 25                     | 0 | 0 | 0 | 0 | 1 | 0 | 0 | 1 | hsa-miR-647 | -0.09 | N/A | Sites in UTR |
| UQCRI1    | NM_006830    | ubiquinol-cytochrome c reductase, complex III subunit XI                  | 0 | 0 | 0 | 0 | 1 | 0 | 0 | 1 | hsa-miR-647 | -0.09 | N/A | Sites in UTR |
| ACSL6     | NM_001009185 | acyl-CoA synthetase long-chain family member 6                            | 0 | 0 | 0 | 0 | 1 | 0 | 0 | 1 | hsa-miR-647 | -0.09 | N/A | Sites in UTR |
| PSD4      | NM_012455    | pleckstrin and Sec7 domain containing 4                                   | 1 | 0 | 0 | 1 | 0 | 0 | 0 | 0 | hsa-miR-647 | -0.09 | N/A | Sites in UTR |
| SYNJ2BP   | NM_018373    | synaptojanin 2 binding protein                                            | 0 | 0 | 0 | 0 | 1 | 0 | 0 | 1 | hsa-miR-647 | -0.09 | N/A | Sites in UTR |
| ZNF677    | NM_182609    | zinc finger protein 677                                                   | 0 | 0 | 0 | 0 | 1 | 0 | 0 | 1 | hsa-miR-647 | -0.09 | N/A | Sites in UTR |
| TRNP1     | NM_001013642 | TMF1-regulated nuclear protein 1                                          | 0 | 0 | 0 | 0 | 1 | 0 | 0 | 1 | hsa-miR-647 | -0.09 | N/A | Sites in UTR |
| CALM1     | NM_006888    | calmodulin 1 (phosphorylase kinase, delta)                                | 0 | 0 | 0 | 0 | 1 | 1 | 0 | 0 | hsa-miR-647 | -0.09 | N/A | Sites in UTR |
| AGPS      | NM_003659    | alkylglycerone phosphate synthase                                         | 0 | 0 | 0 | 0 | 1 | 1 | 0 | 0 | hsa-miR-647 | -0.09 | N/A | Sites in UTR |
| FGF23     | NM_020638    | fibroblast growth factor 23                                               | 0 | 0 | 0 | 0 | 1 | 0 | 1 | 0 | hsa-miR-647 | -0.09 | N/A | Sites in UTR |
| PIP5K1A   | NM_001135636 | phosphatidylinositol-4-phosphate 5-kinase, type I, alpha                  | 0 | 0 | 0 | 0 | 1 | 0 | 1 | 0 | hsa-miR-647 | -0.09 | N/A | Sites in UTR |



|          |              |                                                                  |   |   |   |   |   |   |   |   |             |       |     |              |
|----------|--------------|------------------------------------------------------------------|---|---|---|---|---|---|---|---|-------------|-------|-----|--------------|
| SPTLC2   | NM_004863    | serine palmitoyltransferase, long chain base subunit 2           | 0 | 0 | 0 | 0 | 1 | 0 | 1 | 0 | hsa-miR-647 | -0.09 | N/A | Sites in UTR |
| MGRN1    | NM_001142289 | mahogunin, ring finger 1                                         | 0 | 0 | 0 | 0 | 1 | 0 | 1 | 0 | hsa-miR-647 | -0.09 | N/A | Sites in UTR |
| LONP2    | NM_031490    | lon peptidase 2, peroxisomal                                     | 0 | 0 | 0 | 0 | 1 | 0 | 1 | 0 | hsa-miR-647 | -0.09 | N/A | Sites in UTR |
| ADCY1    | NM_021116    | adenylate cyclase 1 (brain)                                      | 1 | 0 | 1 | 0 | 2 | 1 | 0 | 1 | hsa-miR-647 | -0.09 | N/A | Sites in UTR |
| SLC36A1  | NM_078483    | solute carrier family 36 (proton/amino acid symporter), member 1 | 0 | 0 | 0 | 0 | 2 | 0 | 2 | 0 | hsa-miR-647 | -0.09 | N/A | Sites in UTR |
| IREB2    | NM_004136    | iron-responsive element binding protein 2                        | 0 | 0 | 0 | 0 | 1 | 0 | 0 | 1 | hsa-miR-647 | -0.09 | N/A | Sites in UTR |
| SLC13A1  | NM_022444    | solute carrier family 13 (sodium/sulfate symporters), member 1   | 0 | 0 | 0 | 0 | 1 | 0 | 0 | 1 | hsa-miR-647 | -0.09 | N/A | Sites in UTR |
| GAL3ST1  | NM_004861    | galactose-3-O-sulfotransferase 1                                 | 0 | 0 | 0 | 0 | 1 | 0 | 0 | 1 | hsa-miR-647 | -0.09 | N/A | Sites in UTR |
| AADA3L3  | NM_001103169 | arylacetamide deacetylase-like 3                                 | 0 | 0 | 0 | 0 | 1 | 0 | 0 | 1 | hsa-miR-647 | -0.09 | N/A | Sites in UTR |
| TMEM18   | NM_152834    | transmembrane protein 18                                         | 0 | 0 | 0 | 0 | 1 | 0 | 0 | 1 | hsa-miR-647 | -0.09 | N/A | Sites in UTR |
| USP22    | NM_015276    | ubiquitin specific peptidase 22                                  | 0 | 0 | 0 | 0 | 1 | 1 | 0 | 0 | hsa-miR-647 | -0.09 | N/A | Sites in UTR |
| STAT5B   | NM_012448    | signal transducer and activator of transcription 5B              | 0 | 0 | 0 | 0 | 1 | 0 | 1 | 0 | hsa-miR-647 | -0.09 | N/A | Sites in UTR |
| CLIP2    | NM_003388    | CAP-GLY domain containing linker protein 2                       | 0 | 0 | 0 | 0 | 1 | 0 | 1 | 0 | hsa-miR-647 | -0.09 | N/A | Sites in UTR |
| BCAP29   | NM_001008405 | B-cell receptor-associated protein 29                            | 0 | 0 | 0 | 0 | 1 | 0 | 1 | 0 | hsa-miR-647 | -0.09 | N/A | Sites in UTR |
| FLJ45513 | NM_001242791 | hypothetical LOC729220                                           | 0 | 0 | 0 | 0 | 1 | 0 | 1 | 0 | hsa-miR-647 | -0.09 | N/A | Sites in UTR |
| SRGAP1   | NM_020762    | SLIT-ROBO Rho GTPase activating protein 1                        | 0 | 0 | 0 | 0 | 3 | 1 | 0 | 2 | hsa-miR-647 | -0.09 | N/A | Sites in UTR |
| SH3BP5   | NM_001018009 | SH3-domain binding protein 5 (BTK-associated)                    | 0 | 0 | 0 | 0 | 1 | 0 | 0 | 1 | hsa-miR-647 | -0.09 | N/A | Sites in UTR |
| OPN3     | NM_014322    | opsin 3                                                          | 0 | 0 | 0 | 0 | 1 | 0 | 0 | 1 | hsa-miR-647 | -0.09 | N/A | Sites in UTR |

|           |              |                                                                    |   |   |   |   |   |   |   |   |             |       |     |              |
|-----------|--------------|--------------------------------------------------------------------|---|---|---|---|---|---|---|---|-------------|-------|-----|--------------|
| SLC30A8   | NM_001172811 | solute carrier family 30 (zinc transporter), member 8              | 0 | 0 | 0 | 0 | 1 | 0 | 0 | 1 | hsa-miR-647 | -0.09 | N/A | Sites in UTR |
| ZNF850    | NM_001193552 | zinc finger protein 850                                            | 0 | 0 | 0 | 0 | 1 | 0 | 0 | 1 | hsa-miR-647 | -0.09 | N/A | Sites in UTR |
| B3GALT6   | NM_080605    | UDP-Gal:betaGal beta 1,3-galactosyltransferase polypeptide 6       | 0 | 0 | 0 | 0 | 1 | 0 | 1 | 0 | hsa-miR-647 | -0.09 | N/A | Sites in UTR |
| GATA5     | NM_080473    | GATA binding protein 5                                             | 0 | 0 | 0 | 0 | 1 | 0 | 1 | 0 | hsa-miR-647 | -0.09 | N/A | Sites in UTR |
| PRND      | NM_012409    | prion protein 2 (dublet)                                           | 0 | 0 | 0 | 0 | 3 | 0 | 2 | 1 | hsa-miR-647 | -0.09 | N/A | Sites in UTR |
| NAPB      | NM_022080    | N-ethylmaleimide-sensitive factor attachment protein, beta         | 0 | 0 | 0 | 0 | 2 | 0 | 0 | 2 | hsa-miR-647 | -0.09 | N/A | Sites in UTR |
| EARS2     | NM_001083614 | glutamyl-tRNA synthetase 2, mitochondrial (putative)               | 0 | 0 | 0 | 0 | 2 | 0 | 1 | 1 | hsa-miR-647 | -0.09 | N/A | Sites in UTR |
| C10orf10  | NM_007021    | chromosome 10 open reading frame 10                                | 0 | 0 | 0 | 0 | 1 | 0 | 0 | 1 | hsa-miR-647 | -0.09 | N/A | Sites in UTR |
| MIS12     | NM_024039    | MIS12, MIND kinetochore complex component, homolog (S. pombe)      | 0 | 0 | 0 | 0 | 1 | 0 | 0 | 1 | hsa-miR-647 | -0.09 | N/A | Sites in UTR |
| VCPIP1    | NM_025054    | valosin containing protein (p97)/p47 complex interacting protein 1 | 0 | 0 | 0 | 0 | 1 | 0 | 0 | 1 | hsa-miR-647 | -0.09 | N/A | Sites in UTR |
| CEP63     | NM_001042383 | centrosomal protein 63kDa                                          | 0 | 0 | 0 | 0 | 1 | 0 | 0 | 1 | hsa-miR-647 | -0.09 | N/A | Sites in UTR |
| LRRC27    | NM_001143757 | leucine rich repeat containing 27                                  | 0 | 0 | 0 | 0 | 1 | 0 | 0 | 1 | hsa-miR-647 | -0.09 | N/A | Sites in UTR |
| NDUFA11   | NM_001193375 | NADH dehydrogenase (ubiquinone) 1 alpha subcomplex, 11, 14.7kDa    | 0 | 0 | 0 | 0 | 1 | 0 | 0 | 1 | hsa-miR-647 | -0.09 | N/A | Sites in UTR |
| KRTAP5-10 | NM_001012710 | keratin associated protein 5-10                                    | 0 | 0 | 0 | 0 | 1 | 0 | 0 | 1 | hsa-miR-647 | -0.09 | N/A | Sites in UTR |
| VGLL3     | NM_016206    | vestigial like 3 (Drosophila)                                      | 0 | 0 | 0 | 0 | 1 | 1 | 0 | 0 | hsa-miR-647 | -0.09 | N/A | Sites in UTR |
| GCK       | NM_000162    | glucokinase (hexokinase 4)                                         | 0 | 0 | 0 | 0 | 1 | 0 | 1 | 0 | hsa-miR-647 | -0.09 | N/A | Sites in UTR |
| HOXA11    | NM_005523    | homeobox A11                                                       | 0 | 0 | 0 | 0 | 1 | 0 | 1 | 0 | hsa-miR-647 | -0.09 | N/A | Sites in UTR |
| SLIT1     | NM_003061    | slit homolog 1 (Drosophila)                                        | 0 | 0 | 0 | 0 | 1 | 0 | 1 | 0 | hsa-miR-647 | -0.09 | N/A | Sites in UTR |

|           |              |                                                                                                                                 |   |   |   |   |   |   |   |   |             |       |     |              |
|-----------|--------------|---------------------------------------------------------------------------------------------------------------------------------|---|---|---|---|---|---|---|---|-------------|-------|-----|--------------|
| ATG5      | NM_004849    | ATG5 autophagy related 5 homolog ( <i>S. cerevisiae</i> )                                                                       | 0 | 0 | 0 | 0 | 1 | 0 | 1 | 0 | hsa-miR-647 | -0.09 | N/A | Sites in UTR |
| FRMPD4    | NM_014728    | FERM and PDZ domain containing 4                                                                                                | 1 | 0 | 1 | 0 | 0 | 0 | 0 | 0 | hsa-miR-647 | -0.09 | N/A | Sites in UTR |
| SCARA3    | NM_016240    | scavenger receptor class A, member 3                                                                                            | 0 | 0 | 0 | 0 | 1 | 0 | 1 | 0 | hsa-miR-647 | -0.09 | N/A | Sites in UTR |
| C1QTNF6   | NM_031910    | C1q and tumor necrosis factor related protein 6                                                                                 | 0 | 0 | 0 | 0 | 1 | 0 | 1 | 0 | hsa-miR-647 | -0.09 | N/A | Sites in UTR |
| ADM2      | NM_024866    | adrenomedullin 2                                                                                                                | 0 | 0 | 0 | 0 | 2 | 0 | 1 | 1 | hsa-miR-647 | -0.09 | N/A | Sites in UTR |
| ERCC1     | NM_001166049 | excision repair cross-complementing rodent repair deficiency, complementation group 1 (includes overlapping antisense sequence) | 0 | 0 | 0 | 0 | 1 | 0 | 0 | 1 | hsa-miR-647 | -0.09 | N/A | Sites in UTR |
| MVK       | NM_000431    | mevalonate kinase                                                                                                               | 0 | 0 | 0 | 0 | 1 | 0 | 0 | 1 | hsa-miR-647 | -0.09 | N/A | Sites in UTR |
| PLP1      | NM_000533    | proteolipid protein 1                                                                                                           | 0 | 0 | 0 | 0 | 1 | 0 | 0 | 1 | hsa-miR-647 | -0.09 | N/A | Sites in UTR |
| RS1       | NM_000330    | retinoschisin 1                                                                                                                 | 0 | 0 | 0 | 0 | 1 | 0 | 0 | 1 | hsa-miR-647 | -0.09 | N/A | Sites in UTR |
| C14orf129 | NM_016472    | chromosome 14 open reading frame 129                                                                                            | 0 | 0 | 0 | 0 | 1 | 0 | 0 | 1 | hsa-miR-647 | -0.09 | N/A | Sites in UTR |
| WNK3      | NM_001002838 | WNK lysine deficient protein kinase 3                                                                                           | 0 | 0 | 0 | 0 | 1 | 0 | 0 | 1 | hsa-miR-647 | -0.09 | N/A | Sites in UTR |
| KLC4      | NM_201521    | kinesin light chain 4                                                                                                           | 0 | 0 | 0 | 0 | 1 | 0 | 0 | 1 | hsa-miR-647 | -0.09 | N/A | Sites in UTR |
| CXorf40A  | NM_001171909 | chromosome X open reading frame 40A                                                                                             | 0 | 0 | 0 | 0 | 1 | 0 | 0 | 1 | hsa-miR-647 | -0.09 | N/A | Sites in UTR |
| GAS8      | NM_001481    | growth arrest-specific 8                                                                                                        | 0 | 0 | 0 | 0 | 1 | 0 | 1 | 0 | hsa-miR-647 | -0.09 | N/A | Sites in UTR |
| HHIPL1    | NM_001127258 | HHIP-like 1                                                                                                                     | 0 | 0 | 0 | 0 | 1 | 0 | 1 | 0 | hsa-miR-647 | -0.09 | N/A | Sites in UTR |
| GLP1R     | NM_002062    | glucagon-like peptide 1 receptor                                                                                                | 0 | 0 | 0 | 0 | 1 | 0 | 0 | 1 | hsa-miR-647 | -0.09 | N/A | Sites in UTR |
| MFAP4     | NM_001198695 | microfibrillar-associated protein 4                                                                                             | 0 | 0 | 0 | 0 | 1 | 0 | 0 | 1 | hsa-miR-647 | -0.09 | N/A | Sites in UTR |
| PCSK6     | NM_002570    | proprotein convertase subtilisin/kexin type 6                                                                                   | 0 | 0 | 0 | 0 | 1 | 0 | 0 | 1 | hsa-miR-647 | -0.09 | N/A | Sites in UTR |

|          |              |                                                                                                   |   |   |   |   |   |   |   |   |             |       |     |              |
|----------|--------------|---------------------------------------------------------------------------------------------------|---|---|---|---|---|---|---|---|-------------|-------|-----|--------------|
| PLS1     | NM_001145319 | plastin 1                                                                                         | 0 | 0 | 0 | 0 | 1 | 0 | 0 | 1 | hsa-miR-647 | -0.09 | N/A | Sites in UTR |
| RRAD     | NM_001128850 | Ras-related associated with diabetes                                                              | 0 | 0 | 0 | 0 | 1 | 0 | 0 | 1 | hsa-miR-647 | -0.09 | N/A | Sites in UTR |
| RIPK1    | NM_003804    | receptor (TNFRSF)-interacting serine-threonine kinase 1                                           | 0 | 0 | 0 | 0 | 1 | 0 | 0 | 1 | hsa-miR-647 | -0.09 | N/A | Sites in UTR |
| ARHGEF6  | NM_004840    | Rac/Cdc42 guanine nucleotide exchange factor (GEF) 6                                              | 0 | 0 | 0 | 0 | 1 | 0 | 0 | 1 | hsa-miR-647 | -0.09 | N/A | Sites in UTR |
| PSD3     | NM_015310    | pleckstrin and Sec7 domain containing 3                                                           | 0 | 0 | 0 | 0 | 1 | 0 | 0 | 1 | hsa-miR-647 | -0.09 | N/A | Sites in UTR |
| PRDM16   | NM_022114    | PR domain containing 16                                                                           | 0 | 0 | 0 | 0 | 1 | 0 | 0 | 1 | hsa-miR-647 | -0.09 | N/A | Sites in UTR |
| SH3BGR3  | NM_031286    | SH3 domain binding glutamic acid-rich protein like 3                                              | 0 | 0 | 0 | 0 | 1 | 0 | 0 | 1 | hsa-miR-647 | -0.09 | N/A | Sites in UTR |
| ACACA    | NM_198834    | acetyl-CoA carboxylase alpha                                                                      | 0 | 0 | 0 | 0 | 1 | 0 | 1 | 0 | hsa-miR-647 | -0.09 | N/A | Sites in UTR |
| COL4A2   | NM_001846    | collagen, type IV, alpha 2                                                                        | 0 | 0 | 0 | 0 | 1 | 0 | 1 | 0 | hsa-miR-647 | -0.09 | N/A | Sites in UTR |
| ADAM11   | NM_002390    | ADAM metallopeptidase domain 11                                                                   | 0 | 0 | 0 | 0 | 1 | 0 | 1 | 0 | hsa-miR-647 | -0.09 | N/A | Sites in UTR |
| GAS2L1   | NM_152237    | growth arrest-specific 2 like 1                                                                   | 0 | 0 | 0 | 0 | 1 | 0 | 1 | 0 | hsa-miR-647 | -0.09 | N/A | Sites in UTR |
| AP3M2    | NM_001134296 | adaptor-related protein complex 3, mu 2 subunit                                                   | 0 | 0 | 0 | 0 | 1 | 0 | 1 | 0 | hsa-miR-647 | -0.09 | N/A | Sites in UTR |
| C19orf35 | NM_198532    | chromosome 19 open reading frame 35                                                               | 0 | 0 | 0 | 0 | 1 | 0 | 1 | 0 | hsa-miR-647 | -0.09 | N/A | Sites in UTR |
| TRIM66   | NM_014818    | tripartite motif containing 66                                                                    | 1 | 0 | 0 | 1 | 1 | 0 | 0 | 1 | hsa-miR-647 | -0.09 | N/A | Sites in UTR |
| CPNE3    | NM_003909    | copine III                                                                                        | 0 | 0 | 0 | 0 | 1 | 0 | 0 | 1 | hsa-miR-647 | -0.09 | N/A | Sites in UTR |
| UBTF     | NM_001076683 | upstream binding transcription factor, RNA polymerase I                                           | 0 | 0 | 0 | 0 | 1 | 0 | 1 | 0 | hsa-miR-647 | -0.09 | N/A | Sites in UTR |
| DDX19A   | NM_018332    | DEAD (Asp-Glu-Ala-As) box polypeptide 19A                                                         | 0 | 0 | 0 | 0 | 1 | 0 | 1 | 0 | hsa-miR-647 | -0.09 | N/A | Sites in UTR |
| ALG9     | NM_001077690 | asparagine-linked glycosylation 9, alpha-1,2-mannosyltransferase homolog ( <i>S. cerevisiae</i> ) | 0 | 0 | 0 | 0 | 1 | 0 | 1 | 0 | hsa-miR-647 | -0.09 | N/A | Sites in UTR |

|          |              |                                                      |   |   |   |   |   |   |   |   |             |       |     |              |
|----------|--------------|------------------------------------------------------|---|---|---|---|---|---|---|---|-------------|-------|-----|--------------|
| ATXN7L1  | NM_020725    | ataxin 7-like 1                                      | 0 | 0 | 0 | 0 | 1 | 0 | 1 | 0 | hsa-miR-647 | -0.09 | N/A | Sites in UTR |
| ABCG2    | NM_004827    | ATP-binding cassette, sub-family G (WHITE), member 2 | 0 | 0 | 0 | 0 | 1 | 0 | 0 | 1 | hsa-miR-647 | -0.09 | N/A | Sites in UTR |
| GNPDA1   | NM_005471    | glucosamine-6-phosphate deaminase 1                  | 0 | 0 | 0 | 0 | 1 | 0 | 0 | 1 | hsa-miR-647 | -0.09 | N/A | Sites in UTR |
| NYNRIN   | NM_025081    | NYN domain and retroviral integrase containing       | 0 | 0 | 0 | 0 | 1 | 0 | 0 | 1 | hsa-miR-647 | -0.09 | N/A | Sites in UTR |
| SV2B     | NM_001167580 | synaptic vesicle glycoprotein 2B                     | 0 | 0 | 0 | 0 | 1 | 1 | 0 | 0 | hsa-miR-647 | -0.09 | N/A | Sites in UTR |
| KIF1B    | NM_183416    | kinesin family member 1B                             | 0 | 0 | 0 | 0 | 2 | 0 | 1 | 1 | hsa-miR-647 | -0.09 | N/A | Sites in UTR |
| FSHB     | NM_000510    | follicle stimulating hormone, beta polypeptide       | 0 | 0 | 0 | 0 | 1 | 0 | 1 | 0 | hsa-miR-647 | -0.09 | N/A | Sites in UTR |
| RAB3IL1  | NM_013401    | RAB3A interacting protein (rabin3)-like 1            | 0 | 0 | 0 | 0 | 1 | 0 | 1 | 0 | hsa-miR-647 | -0.09 | N/A | Sites in UTR |
| NRIP3    | NM_020645    | nuclear receptor interacting protein 3               | 0 | 0 | 0 | 0 | 1 | 0 | 1 | 0 | hsa-miR-647 | -0.09 | N/A | Sites in UTR |
| CASKIN1  | NM_020764    | CASK interacting protein 1                           | 0 | 0 | 0 | 0 | 1 | 0 | 1 | 0 | hsa-miR-647 | -0.09 | N/A | Sites in UTR |
| GJD3     | NM_152219    | gap junction protein, delta 3, 31.9kDa               | 1 | 0 | 1 | 0 | 0 | 0 | 0 | 0 | hsa-miR-647 | -0.09 | N/A | Sites in UTR |
| FAM123C  | NM_001105193 | family with sequence similarity 123C                 | 0 | 0 | 0 | 0 | 1 | 0 | 1 | 0 | hsa-miR-647 | -0.09 | N/A | Sites in UTR |
| PTRF     | NM_012232    | polymerase I and transcript release factor           | 0 | 0 | 0 | 0 | 1 | 0 | 1 | 0 | hsa-miR-647 | -0.09 | N/A | Sites in UTR |
| EFCAB1   | NM_001142857 | EF-hand calcium binding domain 1                     | 0 | 0 | 0 | 0 | 1 | 0 | 0 | 1 | hsa-miR-647 | -0.09 | N/A | Sites in UTR |
| ZNF594   | NM_032530    | zinc finger protein 594                              | 0 | 0 | 0 | 0 | 1 | 0 | 0 | 1 | hsa-miR-647 | -0.09 | N/A | Sites in UTR |
| FAM114A1 | NM_138389    | family with sequence similarity 114, member A1       | 0 | 0 | 0 | 0 | 1 | 0 | 0 | 1 | hsa-miR-647 | -0.09 | N/A | Sites in UTR |
| TPRG1    | NM_198485    | tumor protein p63 regulated 1                        | 0 | 0 | 0 | 0 | 1 | 0 | 0 | 1 | hsa-miR-647 | -0.09 | N/A | Sites in UTR |
| MXRA7    | NM_001008529 | matrix-remodelling associated 7                      | 0 | 0 | 0 | 0 | 1 | 0 | 0 | 1 | hsa-miR-647 | -0.09 | N/A | Sites in UTR |

|          |              |                                                                                        |   |   |   |   |   |   |   |   |             |       |     |              |
|----------|--------------|----------------------------------------------------------------------------------------|---|---|---|---|---|---|---|---|-------------|-------|-----|--------------|
| FSTL3    | NM_005860    | folliculin-like 3 (secreted glycoprotein)                                              | 0 | 0 | 0 | 0 | 1 | 0 | 1 | 0 | hsa-miR-647 | -0.09 | N/A | Sites in UTR |
| RAB35    | NM_001167606 | RAB35, member RAS oncogene family                                                      | 0 | 0 | 0 | 0 | 1 | 0 | 1 | 0 | hsa-miR-647 | -0.09 | N/A | Sites in UTR |
| REEP6    | NM_138393    | receptor accessory protein 6                                                           | 0 | 0 | 0 | 0 | 1 | 0 | 1 | 0 | hsa-miR-647 | -0.09 | N/A | Sites in UTR |
| AMZ1     | NM_133463    | archaelysin family metalloproteinase 1                                                 | 0 | 0 | 0 | 0 | 1 | 0 | 1 | 0 | hsa-miR-647 | -0.09 | N/A | Sites in UTR |
| KIF6     | NM_145027    | kinesin family member 6                                                                | 0 | 0 | 0 | 0 | 1 | 0 | 1 | 0 | hsa-miR-647 | -0.09 | N/A | Sites in UTR |
| SEPN1    | NM_020451    | selenoprotein N, 1                                                                     | 1 | 0 | 0 | 1 | 1 | 0 | 1 | 0 | hsa-miR-647 | -0.09 | N/A | Sites in UTR |
| AKAP13   | NM_006738    | A kinase (PRKA) anchor protein 13                                                      | 0 | 0 | 0 | 0 | 2 | 0 | 2 | 0 | hsa-miR-647 | -0.09 | N/A | Sites in UTR |
| HOXC5    | NM_018953    | homeobox C5                                                                            | 0 | 0 | 0 | 0 | 1 | 0 | 0 | 1 | hsa-miR-647 | -0.09 | N/A | Sites in UTR |
| SRGAP2   | NM_001170637 | SLIT-ROBO Rho GTPase activating protein 2                                              | 0 | 0 | 0 | 0 | 1 | 0 | 0 | 1 | hsa-miR-647 | -0.09 | N/A | Sites in UTR |
| RNF185   | NM_001135825 | ring finger protein 185                                                                | 0 | 0 | 0 | 0 | 1 | 0 | 0 | 1 | hsa-miR-647 | -0.09 | N/A | Sites in UTR |
| MIPOL1   | NM_001195296 | mirror-image polydactyly 1                                                             | 0 | 0 | 0 | 0 | 1 | 0 | 0 | 1 | hsa-miR-647 | -0.09 | N/A | Sites in UTR |
| CASP10   | NM_001206524 | caspase 10, apoptosis-related cysteine peptidase                                       | 0 | 0 | 0 | 0 | 1 | 0 | 1 | 0 | hsa-miR-647 | -0.09 | N/A | Sites in UTR |
| KIAA1609 | NM_020947    | KIAA1609                                                                               | 0 | 0 | 0 | 0 | 1 | 0 | 1 | 0 | hsa-miR-647 | -0.09 | N/A | Sites in UTR |
| LMNB2    | NM_032737    | lamin B2                                                                               | 0 | 0 | 0 | 0 | 1 | 0 | 1 | 0 | hsa-miR-647 | -0.09 | N/A | Sites in UTR |
| MDM2     | NM_002392    | Mdm2 p53 binding protein homolog (mouse)                                               | 0 | 0 | 0 | 0 | 1 | 0 | 0 | 1 | hsa-miR-647 | -0.08 | N/A | Sites in UTR |
| EVC      | NM_153717    | Ellis van Creveld syndrome                                                             | 0 | 0 | 0 | 0 | 3 | 0 | 0 | 3 | hsa-miR-647 | -0.08 | N/A | Sites in UTR |
| CDC37    | NM_007065    | cell division cycle 37 homolog (S. cerevisiae)                                         | 0 | 0 | 0 | 0 | 1 | 0 | 0 | 1 | hsa-miR-647 | -0.08 | N/A | Sites in UTR |
| MGAT4A   | NM_001160154 | mannosyl (alpha-1,3-)-glycoprotein beta-1,4-N-acetylglucosaminyltransferase, isozyme A | 0 | 0 | 0 | 0 | 1 | 0 | 0 | 1 | hsa-miR-647 | -0.08 | N/A | Sites in UTR |

|           |              |                                                                                    |   |   |   |   |   |   |   |   |             |       |     |              |
|-----------|--------------|------------------------------------------------------------------------------------|---|---|---|---|---|---|---|---|-------------|-------|-----|--------------|
| SEPSECS   | NM_016955    | Sep (O-phosphoserine) tRNA:Sec (selenocysteine) tRNA synthase                      | 0 | 0 | 0 | 0 | 1 | 0 | 0 | 1 | hsa-miR-647 | -0.08 | N/A | Sites in UTR |
| KIAA1328  | NM_020776    | KIAA1328                                                                           | 0 | 0 | 0 | 0 | 1 | 0 | 0 | 1 | hsa-miR-647 | -0.08 | N/A | Sites in UTR |
| C20orf118 | NM_080628    | chromosome 20 open reading frame 118                                               | 0 | 0 | 0 | 0 | 1 | 0 | 0 | 1 | hsa-miR-647 | -0.08 | N/A | Sites in UTR |
| PSAPL1    | NM_001085382 | prosaposin-like 1 (gene/pseudogene)                                                | 0 | 0 | 0 | 0 | 1 | 0 | 0 | 1 | hsa-miR-647 | -0.08 | N/A | Sites in UTR |
| ATP9A     | NM_006045    | ATPase, class II, type 9A                                                          | 0 | 0 | 0 | 0 | 2 | 0 | 1 | 1 | hsa-miR-647 | -0.08 | N/A | Sites in UTR |
| LRRC55    | NM_001005210 | leucine rich repeat containing 55                                                  | 0 | 0 | 0 | 0 | 1 | 1 | 0 | 0 | hsa-miR-647 | -0.08 | N/A | Sites in UTR |
| MYH10     | NM_005964    | myosin, heavy chain 10, non-muscle                                                 | 0 | 0 | 0 | 0 | 1 | 0 | 1 | 0 | hsa-miR-647 | -0.08 | N/A | Sites in UTR |
| ZDHHC3    | NM_001135179 | zinc finger, DHHC-type containing 3                                                | 0 | 0 | 0 | 0 | 1 | 0 | 1 | 0 | hsa-miR-647 | -0.08 | N/A | Sites in UTR |
| ELP3      | NM_018091    | elongation protein 3 homolog ( <i>S. cerevisiae</i> )                              | 0 | 0 | 0 | 0 | 1 | 0 | 1 | 0 | hsa-miR-647 | -0.08 | N/A | Sites in UTR |
| TMC8      | NM_152468    | transmembrane channel-like 8                                                       | 0 | 0 | 0 | 0 | 1 | 0 | 1 | 0 | hsa-miR-647 | -0.08 | N/A | Sites in UTR |
| MXD4      | NM_006454    | MAX dimerization protein 4                                                         | 0 | 0 | 0 | 0 | 3 | 1 | 2 | 0 | hsa-miR-647 | -0.08 | N/A | Sites in UTR |
| TNFRSF14  | NM_003820    | tumor necrosis factor receptor superfamily, member 14 (herpesvirus entry mediator) | 0 | 0 | 0 | 0 | 1 | 0 | 0 | 1 | hsa-miR-647 | -0.08 | N/A | Sites in UTR |
| IQGAP1    | NM_003870    | IQ motif containing GTPase activating protein 1                                    | 0 | 0 | 0 | 0 | 1 | 0 | 0 | 1 | hsa-miR-647 | -0.08 | N/A | Sites in UTR |
| DOK4      | NM_018110    | docking protein 4                                                                  | 0 | 0 | 0 | 0 | 1 | 0 | 0 | 1 | hsa-miR-647 | -0.08 | N/A | Sites in UTR |
| RAVER1    | NM_133452    | ribonucleoprotein, PTB-binding 1                                                   | 0 | 0 | 0 | 0 | 1 | 0 | 0 | 1 | hsa-miR-647 | -0.08 | N/A | Sites in UTR |
| SNX19     | NM_014758    | sorting nexin 19                                                                   | 0 | 0 | 0 | 0 | 1 | 0 | 0 | 1 | hsa-miR-647 | -0.08 | N/A | Sites in UTR |
| USP6NL    | NM_001080491 | USP6 N-terminal like                                                               | 0 | 0 | 0 | 0 | 1 | 0 | 1 | 0 | hsa-miR-647 | -0.08 | N/A | Sites in UTR |
| C9orf5    | NM_032012    | chromosome 9 open reading frame 5                                                  | 0 | 0 | 0 | 0 | 1 | 0 | 1 | 0 | hsa-miR-647 | -0.08 | N/A | Sites in UTR |

|              |              |                                                                                    |   |   |   |   |   |   |   |   |             |       |     |              |
|--------------|--------------|------------------------------------------------------------------------------------|---|---|---|---|---|---|---|---|-------------|-------|-----|--------------|
| CCDC113      | NM_001142302 | coiled-coil domain containing 113                                                  | 0 | 0 | 0 | 0 | 1 | 0 | 1 | 0 | hsa-miR-647 | -0.08 | N/A | Sites in UTR |
| C19orf12     | NM_001031726 | chromosome 19 open reading frame 12                                                | 0 | 0 | 0 | 0 | 1 | 0 | 1 | 0 | hsa-miR-647 | -0.08 | N/A | Sites in UTR |
| DLGAP2       | NM_004745    | discs, large (Drosophila) homolog-associated protein 2                             | 0 | 0 | 0 | 0 | 3 | 0 | 2 | 1 | hsa-miR-647 | -0.08 | N/A | Sites in UTR |
| NPTXR        | NM_014293    | neuronal pentraxin receptor                                                        | 1 | 0 | 0 | 1 | 1 | 0 | 1 | 0 | hsa-miR-647 | -0.08 | N/A | Sites in UTR |
| PEX19        | NM_001193644 | peroxisomal biogenesis factor 19                                                   | 0 | 0 | 0 | 0 | 1 | 0 | 0 | 1 | hsa-miR-647 | -0.08 | N/A | Sites in UTR |
| SNTA1        | NM_003098    | syntrophin, alpha 1 (dystrophin-associated protein A1, 59kDa, acidic component)    | 0 | 0 | 0 | 0 | 1 | 0 | 0 | 1 | hsa-miR-647 | -0.08 | N/A | Sites in UTR |
| KDM4B        | NM_015015    | lysine (K)-specific demethylase 4B                                                 | 0 | 0 | 0 | 0 | 1 | 0 | 0 | 1 | hsa-miR-647 | -0.08 | N/A | Sites in UTR |
| OR2H1        | NM_030883    | olfactory receptor, family 2, subfamily H, member 1                                | 0 | 0 | 0 | 0 | 1 | 0 | 0 | 1 | hsa-miR-647 | -0.08 | N/A | Sites in UTR |
| MRTO4        | NM_016183    | mRNA turnover 4 homolog (S. cerevisiae)                                            | 0 | 0 | 0 | 0 | 1 | 0 | 0 | 1 | hsa-miR-647 | -0.08 | N/A | Sites in UTR |
| RETSAT       | NM_017750    | retinol saturase (all-trans-retinol 13,14-reductase)                               | 0 | 0 | 0 | 0 | 1 | 0 | 0 | 1 | hsa-miR-647 | -0.08 | N/A | Sites in UTR |
| SAP30L       | NM_001131062 | SAP30-like                                                                         | 0 | 0 | 0 | 0 | 1 | 0 | 0 | 1 | hsa-miR-647 | -0.08 | N/A | Sites in UTR |
| LOC100132146 | NM_001195442 | hypothetical LOC100132146                                                          | 0 | 0 | 0 | 0 | 1 | 0 | 0 | 1 | hsa-miR-647 | -0.08 | N/A | Sites in UTR |
| TRH          | NM_007117    | thyrotropin-releasing hormone                                                      | 0 | 0 | 0 | 0 | 1 | 0 | 1 | 0 | hsa-miR-647 | -0.08 | N/A | Sites in UTR |
| DGKE         | NM_003647    | diacylglycerol kinase, epsilon 64kDa                                               | 0 | 0 | 0 | 0 | 1 | 0 | 1 | 0 | hsa-miR-647 | -0.08 | N/A | Sites in UTR |
| TCEANC2      | NM_153035    | transcription elongation factor A (SII) N-terminal and central domain containing 2 | 0 | 0 | 0 | 0 | 2 | 0 | 0 | 2 | hsa-miR-647 | -0.08 | N/A | Sites in UTR |
| ABCA1        | NM_005502    | ATP-binding cassette, sub-family A (ABC1), member 1                                | 0 | 0 | 0 | 0 | 1 | 0 | 0 | 1 | hsa-miR-647 | -0.08 | N/A | Sites in UTR |
| ZBTB40       | NM_001083621 | zinc finger and BTB domain containing 40                                           | 0 | 0 | 0 | 0 | 1 | 0 | 0 | 1 | hsa-miR-647 | -0.08 | N/A | Sites in UTR |
| SLC39A9      | NM_018375    | solute carrier family 39 (zinc transporter), member 9                              | 0 | 0 | 0 | 0 | 1 | 0 | 0 | 1 | hsa-miR-647 | -0.08 | N/A | Sites in UTR |



|         |              |                                                                                               |   |   |   |   |   |   |   |   |             |       |     |              |
|---------|--------------|-----------------------------------------------------------------------------------------------|---|---|---|---|---|---|---|---|-------------|-------|-----|--------------|
| FLG2    | NM_001014342 | filaggrin family member 2                                                                     | 0 | 0 | 0 | 0 | 1 | 0 | 0 | 1 | hsa-miR-647 | -0.08 | N/A | Sites in UTR |
| C8orf44 | NM_019607    | chromosome 8 open reading frame 44                                                            | 0 | 0 | 0 | 0 | 1 | 0 | 1 | 0 | hsa-miR-647 | -0.08 | N/A | Sites in UTR |
| DCTN5   | NM_001199743 | dynactin 5 (p25)                                                                              | 0 | 0 | 0 | 0 | 2 | 1 | 0 | 1 | hsa-miR-647 | -0.08 | N/A | Sites in UTR |
| CEACAM1 | NM_001024912 | carcinoembryonic antigen-related cell adhesion molecule 1 (biliary glycoprotein)              | 0 | 0 | 0 | 0 | 1 | 0 | 0 | 1 | hsa-miR-647 | -0.08 | N/A | Sites in UTR |
| MAPKBP1 | NM_001128608 | mitogen-activated protein kinase binding protein 1                                            | 0 | 0 | 0 | 0 | 1 | 0 | 0 | 1 | hsa-miR-647 | -0.08 | N/A | Sites in UTR |
| HCAR1   | NM_032554    | hydroxycarboxylic acid receptor 1                                                             | 0 | 0 | 0 | 0 | 1 | 0 | 0 | 1 | hsa-miR-647 | -0.08 | N/A | Sites in UTR |
| POLK    | NM_016218    | polymerase (DNA directed) kappa                                                               | 0 | 0 | 0 | 0 | 1 | 0 | 0 | 1 | hsa-miR-647 | -0.08 | N/A | Sites in UTR |
| PGAP3   | NM_033419    | post-GPI attachment to proteins 3                                                             | 0 | 0 | 0 | 0 | 1 | 0 | 0 | 1 | hsa-miR-647 | -0.08 | N/A | Sites in UTR |
| ASB14   | NM_001142733 | ankyrin repeat and SOCS box containing 14                                                     | 0 | 0 | 0 | 0 | 1 | 0 | 0 | 1 | hsa-miR-647 | -0.08 | N/A | Sites in UTR |
| NEGR1   | NM_173808    | neuronal growth regulator 1                                                                   | 0 | 0 | 0 | 0 | 1 | 0 | 0 | 1 | hsa-miR-647 | -0.08 | N/A | Sites in UTR |
| ZNF678  | NM_178549    | zinc finger protein 678                                                                       | 0 | 0 | 0 | 0 | 1 | 0 | 0 | 1 | hsa-miR-647 | -0.08 | N/A | Sites in UTR |
| GOLGA7B | NM_001010917 | golgin A7 family, member B                                                                    | 0 | 0 | 0 | 0 | 1 | 0 | 0 | 1 | hsa-miR-647 | -0.08 | N/A | Sites in UTR |
| AGPAT4  | NM_020133    | 1-acylglycerol-3-phosphate O-acyltransferase 4 (lysophosphatidic acid acyltransferase, delta) | 0 | 0 | 0 | 0 | 2 | 0 | 0 | 2 | hsa-miR-647 | -0.08 | N/A | Sites in UTR |
| CEBPD   | NM_005195    | CCAAT/enhancer binding protein (C/EBP), delta                                                 | 0 | 0 | 0 | 0 | 1 | 0 | 1 | 0 | hsa-miR-647 | -0.08 | N/A | Sites in UTR |
| GSPT1   | NM_001130006 | G1 to S phase transition 1                                                                    | 0 | 0 | 0 | 0 | 1 | 0 | 1 | 0 | hsa-miR-647 | -0.08 | N/A | Sites in UTR |
| GIT2    | NM_001135213 | G protein-coupled receptor kinase interacting ArfGAP 2                                        | 0 | 0 | 0 | 0 | 1 | 0 | 1 | 0 | hsa-miR-647 | -0.08 | N/A | Sites in UTR |
| SLFN11  | NM_001104587 | schlafen family member 11                                                                     | 0 | 0 | 0 | 0 | 1 | 0 | 1 | 0 | hsa-miR-647 | -0.08 | N/A | Sites in UTR |
| ZBTB46  | NM_025224    | zinc finger and BTB domain containing 46                                                      | 0 | 0 | 0 | 0 | 1 | 0 | 1 | 0 | hsa-miR-647 | -0.08 | N/A | Sites in UTR |

|          |              |                                                                                |   |   |   |   |   |   |   |   |   |             |       |     |              |
|----------|--------------|--------------------------------------------------------------------------------|---|---|---|---|---|---|---|---|---|-------------|-------|-----|--------------|
| SPRED1   | NM_152594    | sprouty-related, EVH1 domain containing 1                                      | 1 | 0 | 1 | 0 | 0 | 0 | 0 | 0 | 0 | hsa-miR-647 | -0.08 | N/A | Sites in UTR |
| SLC7A2   | NM_001008539 | solute carrier family 7 (cationic amino acid transporter, y+ system), member 2 | 0 | 0 | 0 | 0 | 1 | 0 | 0 | 1 | 0 | hsa-miR-647 | -0.08 | N/A | Sites in UTR |
| ADAP1    | NM_006869    | ArfGAP with dual PH domains 1                                                  | 0 | 0 | 0 | 0 | 1 | 0 | 0 | 1 | 0 | hsa-miR-647 | -0.08 | N/A | Sites in UTR |
| MMACHC   | NM_015506    | methylmalonic aciduria (cobalamin deficiency) cbIC type, with homocystinuria   | 0 | 0 | 0 | 0 | 1 | 0 | 0 | 1 | 0 | hsa-miR-647 | -0.08 | N/A | Sites in UTR |
| PYGO2    | NM_138300    | pygopus homolog 2 (Drosophila)                                                 | 0 | 0 | 0 | 0 | 1 | 0 | 0 | 1 | 0 | hsa-miR-647 | -0.08 | N/A | Sites in UTR |
| HLA-DPB1 | NM_002121    | major histocompatibility complex, class II, DP beta 1                          | 0 | 0 | 0 | 0 | 1 | 0 | 1 | 0 | 0 | hsa-miR-647 | -0.08 | N/A | Sites in UTR |
| IL17RD   | NM_017563    | interleukin 17 receptor D                                                      | 0 | 0 | 0 | 0 | 1 | 0 | 1 | 0 | 0 | hsa-miR-647 | -0.08 | N/A | Sites in UTR |
| SIK1     | NM_173354    | salt-inducible kinase 1                                                        | 0 | 0 | 0 | 0 | 1 | 0 | 1 | 0 | 0 | hsa-miR-647 | -0.08 | N/A | Sites in UTR |
| KIF1A    | NM_004321    | kinesin family member 1A                                                       | 1 | 0 | 0 | 1 | 1 | 0 | 1 | 0 | 0 | hsa-miR-647 | -0.08 | N/A | Sites in UTR |
| DPP6     | NM_001039350 | dipeptidyl-peptidase 6                                                         | 0 | 0 | 0 | 0 | 1 | 0 | 0 | 1 | 0 | hsa-miR-647 | -0.08 | N/A | Sites in UTR |
| HNF4G    | NM_004133    | hepatocyte nuclear factor 4, gamma                                             | 0 | 0 | 0 | 0 | 1 | 0 | 0 | 1 | 0 | hsa-miR-647 | -0.08 | N/A | Sites in UTR |
| LAMC3    | NM_006059    | laminin, gamma 3                                                               | 0 | 0 | 0 | 0 | 1 | 0 | 0 | 1 | 0 | hsa-miR-647 | -0.08 | N/A | Sites in UTR |
| CARHSP1  | NM_001042476 | calcium regulated heat stable protein 1, 24kDa                                 | 0 | 0 | 0 | 0 | 1 | 0 | 0 | 1 | 0 | hsa-miR-647 | -0.08 | N/A | Sites in UTR |
| TMOD3    | NM_014547    | tropomodulin 3 (ubiquitous)                                                    | 0 | 0 | 0 | 0 | 1 | 0 | 0 | 1 | 0 | hsa-miR-647 | -0.08 | N/A | Sites in UTR |
| ZDHHC2   | NM_016353    | zinc finger, DHHC-type containing 2                                            | 0 | 0 | 0 | 0 | 1 | 0 | 0 | 1 | 0 | hsa-miR-647 | -0.08 | N/A | Sites in UTR |
| C17orf63 | NM_001077498 | chromosome 17 open reading frame 63                                            | 1 | 0 | 0 | 1 | 0 | 0 | 0 | 0 | 0 | hsa-miR-647 | -0.08 | N/A | Sites in UTR |
| REEP3    | NM_001001330 | receptor accessory protein 3                                                   | 0 | 0 | 0 | 0 | 1 | 0 | 0 | 1 | 0 | hsa-miR-647 | -0.08 | N/A | Sites in UTR |
| IGF2     | NM_000612    | insulin-like growth factor 2 (somatomedin A)                                   | 0 | 0 | 0 | 0 | 1 | 0 | 1 | 0 | 0 | hsa-miR-647 | -0.08 | N/A | Sites in UTR |

|           |              |                                                                      |   |   |   |   |   |   |   |   |             |       |     |              |
|-----------|--------------|----------------------------------------------------------------------|---|---|---|---|---|---|---|---|-------------|-------|-----|--------------|
| TMED10    | NM_006827    | transmembrane emp24-like trafficking protein 10 (yeast)              | 0 | 0 | 0 | 0 | 1 | 0 | 1 | 0 | hsa-miR-647 | -0.08 | N/A | Sites in UTR |
| PCNX      | NM_014982    | pecanex homolog (Drosophila)                                         | 1 | 0 | 1 | 0 | 0 | 0 | 0 | 0 | hsa-miR-647 | -0.08 | N/A | Sites in UTR |
| BMF       | NM_001003940 | Bcl2 modifying factor                                                | 0 | 0 | 0 | 0 | 1 | 0 | 1 | 0 | hsa-miR-647 | -0.08 | N/A | Sites in UTR |
| HN1L      | NM_144570    | hematological and neurological expressed 1-like                      | 0 | 0 | 0 | 0 | 1 | 0 | 1 | 0 | hsa-miR-647 | -0.08 | N/A | Sites in UTR |
| PPARGC1B  | NM_001172698 | peroxisome proliferator-activated receptor gamma, coactivator 1 beta | 0 | 0 | 0 | 0 | 1 | 0 | 1 | 0 | hsa-miR-647 | -0.08 | N/A | Sites in UTR |
| MEGF6     | NM_001409    | multiple EGF-like-domains 6                                          | 0 | 0 | 0 | 0 | 2 | 0 | 1 | 1 | hsa-miR-647 | -0.08 | N/A | Sites in UTR |
| GRB2      | NM_002086    | growth factor receptor-bound protein 2                               | 0 | 0 | 0 | 0 | 1 | 0 | 0 | 1 | hsa-miR-647 | -0.08 | N/A | Sites in UTR |
| HMGA1     | NM_002131    | high mobility group AT-hook 1                                        | 0 | 0 | 0 | 0 | 1 | 0 | 0 | 1 | hsa-miR-647 | -0.08 | N/A | Sites in UTR |
| CYTH2     | NM_004228    | cytohesin 2                                                          | 0 | 0 | 0 | 0 | 1 | 0 | 0 | 1 | hsa-miR-647 | -0.08 | N/A | Sites in UTR |
| SRSF12    | NM_080743    | serine/arginine-rich splicing factor 12                              | 0 | 0 | 0 | 0 | 1 | 0 | 0 | 1 | hsa-miR-647 | -0.08 | N/A | Sites in UTR |
| CYP4V2    | NM_207352    | cytochrome P450, family 4, subfamily V, polypeptide 2                | 0 | 0 | 0 | 0 | 1 | 0 | 0 | 1 | hsa-miR-647 | -0.08 | N/A | Sites in UTR |
| NEK6      | NM_001145001 | NIMA (never in mitosis gene a)-related kinase 6                      | 0 | 0 | 0 | 0 | 1 | 0 | 1 | 0 | hsa-miR-647 | -0.08 | N/A | Sites in UTR |
| APOL4     | NM_030643    | apolipoprotein L, 4                                                  | 0 | 0 | 0 | 0 | 1 | 0 | 1 | 0 | hsa-miR-647 | -0.08 | N/A | Sites in UTR |
| MUC20     | NM_001098516 | mucin 20, cell surface associated                                    | 0 | 0 | 0 | 0 | 3 | 0 | 2 | 1 | hsa-miR-647 | -0.08 | N/A | Sites in UTR |
| ZFP3      | NM_153018    | zinc finger protein 3 homolog (mouse)                                | 0 | 0 | 0 | 0 | 2 | 0 | 0 | 2 | hsa-miR-647 | -0.08 | N/A | Sites in UTR |
| NRP2      | NM_003872    | neuropilin 2                                                         | 0 | 0 | 0 | 0 | 1 | 0 | 0 | 1 | hsa-miR-647 | -0.08 | N/A | Sites in UTR |
| NEURL     | NM_004210    | neuralized homolog (Drosophila)                                      | 0 | 0 | 0 | 0 | 1 | 0 | 0 | 1 | hsa-miR-647 | -0.08 | N/A | Sites in UTR |
| RAB11FIP5 | NM_015470    | RAB11 family interacting protein 5 (class I)                         | 0 | 0 | 0 | 0 | 1 | 0 | 0 | 1 | hsa-miR-647 | -0.08 | N/A | Sites in UTR |

|          |              |                                                                                                   |   |   |   |   |   |   |   |   |             |       |     |              |
|----------|--------------|---------------------------------------------------------------------------------------------------|---|---|---|---|---|---|---|---|-------------|-------|-----|--------------|
| CCM2     | NM_001029835 | cerebral cavernous malformation 2                                                                 | 0 | 0 | 0 | 0 | 1 | 0 | 0 | 1 | hsa-miR-647 | -0.08 | N/A | Sites in UTR |
| NR5A1    | NM_004959    | nuclear receptor subfamily 5, group A, member 1                                                   | 0 | 0 | 0 | 0 | 1 | 0 | 1 | 0 | hsa-miR-647 | -0.08 | N/A | Sites in UTR |
| RAI1     | NM_030665    | retinoic acid induced 1                                                                           | 0 | 0 | 0 | 0 | 1 | 0 | 1 | 0 | hsa-miR-647 | -0.08 | N/A | Sites in UTR |
| GNPNAT1  | NM_198066    | glucosamine-phosphate N-acetyltransferase 1                                                       | 0 | 0 | 0 | 0 | 1 | 0 | 1 | 0 | hsa-miR-647 | -0.08 | N/A | Sites in UTR |
| SPNS2    | NM_001124758 | spinster homolog 2 (Drosophila)                                                                   | 0 | 0 | 0 | 0 | 1 | 0 | 1 | 0 | hsa-miR-647 | -0.08 | N/A | Sites in UTR |
| DCAF7    | NM_005828    | DDB1 and CUL4 associated factor 7                                                                 | 0 | 0 | 0 | 0 | 2 | 0 | 2 | 0 | hsa-miR-647 | -0.08 | N/A | Sites in UTR |
| NSL1     | NM_001042549 | NSL1, MIND kinetochore complex component, homolog (S. cerevisiae)                                 | 0 | 0 | 0 | 0 | 2 | 0 | 2 | 0 | hsa-miR-647 | -0.08 | N/A | Sites in UTR |
| COX19    | NM_001031617 | COX19 cytochrome c oxidase assembly homolog (S. cerevisiae)                                       | 0 | 0 | 0 | 0 | 2 | 0 | 2 | 0 | hsa-miR-647 | -0.08 | N/A | Sites in UTR |
| FOXO1    | NM_002015    | forkhead box O1                                                                                   | 0 | 0 | 0 | 0 | 1 | 0 | 0 | 1 | hsa-miR-647 | -0.07 | N/A | Sites in UTR |
| FLT4     | NM_182925    | fms-related tyrosine kinase 4                                                                     | 0 | 0 | 0 | 0 | 1 | 0 | 0 | 1 | hsa-miR-647 | -0.07 | N/A | Sites in UTR |
| SMARCC2  | NM_001130420 | SWI/SNF related, matrix associated, actin dependent regulator of chromatin, subfamily c, member 2 | 0 | 0 | 0 | 0 | 1 | 0 | 0 | 1 | hsa-miR-647 | -0.07 | N/A | Sites in UTR |
| SULT4A1  | NM_014351    | sulfotransferase family 4A, member 1                                                              | 0 | 0 | 0 | 0 | 1 | 0 | 0 | 1 | hsa-miR-647 | -0.07 | N/A | Sites in UTR |
| RNF170   | NM_001160224 | ring finger protein 170                                                                           | 0 | 0 | 0 | 0 | 1 | 0 | 0 | 1 | hsa-miR-647 | -0.07 | N/A | Sites in UTR |
| TNFRSF8  | NM_001243    | tumor necrosis factor receptor superfamily, member 8                                              | 0 | 0 | 0 | 0 | 1 | 0 | 1 | 0 | hsa-miR-647 | -0.07 | N/A | Sites in UTR |
| MAP4K4   | NM_001242559 | mitogen-activated protein kinase kinase kinase kinase 4                                           | 0 | 0 | 0 | 0 | 1 | 0 | 1 | 0 | hsa-miR-647 | -0.07 | N/A | Sites in UTR |
| TMEM229B | NM_182526    | transmembrane protein 229B                                                                        | 0 | 0 | 0 | 0 | 1 | 0 | 1 | 0 | hsa-miR-647 | -0.07 | N/A | Sites in UTR |
| IBA57    | NM_001010867 | IBA57, iron-sulfur cluster assembly homolog (S. cerevisiae)                                       | 0 | 0 | 0 | 0 | 1 | 0 | 1 | 0 | hsa-miR-647 | -0.07 | N/A | Sites in UTR |
| IYD      | NM_001164694 | iodotyrosine deiodinase                                                                           | 0 | 0 | 0 | 0 | 1 | 0 | 1 | 0 | hsa-miR-647 | -0.07 | N/A | Sites in UTR |

|              |              |                                                                   |   |   |   |   |   |   |   |   |             |       |     |              |
|--------------|--------------|-------------------------------------------------------------------|---|---|---|---|---|---|---|---|-------------|-------|-----|--------------|
| LOC100507421 | NM_001195278 | transmembrane protein 178-like                                    | 0 | 0 | 0 | 0 | 2 | 0 | 1 | 1 | hsa-miR-647 | -0.07 | N/A | Sites in UTR |
| TNFRSF9      | NM_001561    | tumor necrosis factor receptor superfamily, member 9              | 0 | 0 | 0 | 0 | 1 | 1 | 0 | 0 | hsa-miR-647 | -0.07 | N/A | Sites in UTR |
| SEC62        | NM_003262    | SEC62 homolog (S. cerevisiae)                                     | 0 | 0 | 0 | 0 | 1 | 1 | 0 | 0 | hsa-miR-647 | -0.07 | N/A | Sites in UTR |
| CPLX4        | NM_181654    | complexin 4                                                       | 0 | 0 | 0 | 0 | 1 | 0 | 0 | 1 | hsa-miR-647 | -0.07 | N/A | Sites in UTR |
| C12orf76     | NM_207435    | chromosome 12 open reading frame 76                               | 0 | 0 | 0 | 0 | 1 | 0 | 0 | 1 | hsa-miR-647 | -0.07 | N/A | Sites in UTR |
| TEAD1        | NM_021961    | TEA domain family member 1 (SV40 transcriptional enhancer factor) | 1 | 0 | 0 | 1 | 2 | 0 | 1 | 1 | hsa-miR-647 | -0.07 | N/A | Sites in UTR |
| TMEM132B     | NM_052907    | transmembrane protein 132B                                        | 0 | 0 | 0 | 0 | 2 | 1 | 0 | 1 | hsa-miR-647 | -0.07 | N/A | Sites in UTR |
| DIO3         | NM_001362    | deiodinase, iodothyronine, type III                               | 0 | 0 | 0 | 0 | 1 | 0 | 0 | 1 | hsa-miR-647 | -0.07 | N/A | Sites in UTR |
| SLC26A2      | NM_000112    | solute carrier family 26 (sulfate transporter), member 2          | 0 | 0 | 0 | 0 | 2 | 0 | 0 | 2 | hsa-miR-647 | -0.07 | N/A | Sites in UTR |
| IGSF3        | NM_001007237 | immunoglobulin superfamily, member 3                              | 0 | 0 | 0 | 0 | 1 | 0 | 1 | 0 | hsa-miR-647 | -0.07 | N/A | Sites in UTR |
| NUAK1        | NM_014840    | NUAK family, SNF1-like kinase, 1                                  | 0 | 0 | 0 | 0 | 1 | 0 | 0 | 1 | hsa-miR-647 | -0.07 | N/A | Sites in UTR |
| MAPRE2       | NM_001143826 | microtubule-associated protein, RP/EB family, member 2            | 0 | 0 | 0 | 0 | 1 | 0 | 1 | 0 | hsa-miR-647 | -0.07 | N/A | Sites in UTR |
| RASA3        | NM_007368    | RAS p21 protein activator 3                                       | 0 | 0 | 0 | 0 | 1 | 0 | 1 | 0 | hsa-miR-647 | -0.07 | N/A | Sites in UTR |
| ZNF250       | NM_001109689 | zinc finger protein 250                                           | 0 | 0 | 0 | 0 | 1 | 0 | 1 | 0 | hsa-miR-647 | -0.07 | N/A | Sites in UTR |
| FBN3         | NM_032447    | fibrillin 3                                                       | 0 | 0 | 0 | 0 | 1 | 0 | 0 | 1 | hsa-miR-647 | -0.07 | N/A | Sites in UTR |
| PAQR8        | NM_133367    | progesterone and adipoQ receptor family member VIII               | 0 | 0 | 0 | 0 | 1 | 0 | 0 | 1 | hsa-miR-647 | -0.07 | N/A | Sites in UTR |
| TTYH2        | NM_032646    | tweety homolog 2 (Drosophila)                                     | 0 | 0 | 0 | 0 | 1 | 0 | 0 | 1 | hsa-miR-647 | -0.07 | N/A | Sites in UTR |
| TNFAIP8L1    | NM_001167942 | tumor necrosis factor, alpha-induced protein 8-like 1             | 0 | 0 | 0 | 0 | 1 | 0 | 0 | 1 | hsa-miR-647 | -0.07 | N/A | Sites in UTR |

|         |              |                                                                                       |   |   |   |   |   |   |   |   |             |       |     |              |
|---------|--------------|---------------------------------------------------------------------------------------|---|---|---|---|---|---|---|---|-------------|-------|-----|--------------|
| FAM110C | NM_001077710 | family with sequence similarity 110, member C                                         | 0 | 0 | 0 | 0 | 1 | 0 | 0 | 1 | hsa-miR-647 | -0.07 | N/A | Sites in UTR |
| SMAD5   | NM_001001419 | SMAD family member 5                                                                  | 1 | 0 | 1 | 0 | 0 | 0 | 0 | 0 | hsa-miR-647 | -0.07 | N/A | Sites in UTR |
| CELF2   | NM_001025076 | CUGBP, Elav-like family member 2                                                      | 0 | 0 | 0 | 0 | 1 | 0 | 1 | 0 | hsa-miR-647 | -0.07 | N/A | Sites in UTR |
| GDF7    | NM_182828    | growth differentiation factor 7                                                       | 0 | 0 | 0 | 0 | 1 | 0 | 1 | 0 | hsa-miR-647 | -0.07 | N/A | Sites in UTR |
| ADCYAP1 | NM_001099733 | adenylate cyclase activating polypeptide 1 (pituitary)                                | 0 | 0 | 0 | 0 | 1 | 0 | 0 | 1 | hsa-miR-647 | -0.07 | N/A | Sites in UTR |
| S1PR3   | NM_005226    | sphingosine-1-phosphate receptor 3                                                    | 0 | 0 | 0 | 0 | 1 | 0 | 0 | 1 | hsa-miR-647 | -0.07 | N/A | Sites in UTR |
| MAOA    | NM_000240    | monoamine oxidase A                                                                   | 0 | 0 | 0 | 0 | 1 | 0 | 0 | 1 | hsa-miR-647 | -0.07 | N/A | Sites in UTR |
| TRIM13  | NM_001007278 | tripartite motif containing 13                                                        | 0 | 0 | 0 | 0 | 1 | 0 | 0 | 1 | hsa-miR-647 | -0.07 | N/A | Sites in UTR |
| CECR6   | NM_001163079 | cat eye syndrome chromosome region, candidate 6                                       | 0 | 0 | 0 | 0 | 1 | 0 | 0 | 1 | hsa-miR-647 | -0.07 | N/A | Sites in UTR |
| DEPDC1  | NM_001114120 | DEP domain containing 1                                                               | 0 | 0 | 0 | 0 | 1 | 0 | 0 | 1 | hsa-miR-647 | -0.07 | N/A | Sites in UTR |
| RNF213  | NM_020914    | ring finger protein 213                                                               | 0 | 0 | 0 | 0 | 1 | 0 | 0 | 1 | hsa-miR-647 | -0.07 | N/A | Sites in UTR |
| CDS2    | NM_003818    | CDP-diacylglycerol synthase (phosphatidate cytidylyltransferase) 2                    | 0 | 0 | 0 | 0 | 1 | 1 | 0 | 0 | hsa-miR-647 | -0.07 | N/A | Sites in UTR |
| ZNF510  | NM_014930    | zinc finger protein 510                                                               | 0 | 0 | 0 | 0 | 1 | 0 | 1 | 0 | hsa-miR-647 | -0.07 | N/A | Sites in UTR |
| AFF4    | NM_014423    | AF4/FMR2 family, member 4                                                             | 0 | 0 | 0 | 0 | 1 | 0 | 1 | 0 | hsa-miR-647 | -0.07 | N/A | Sites in UTR |
| SOCS7   | NM_014598    | suppressor of cytokine signaling 7                                                    | 1 | 0 | 1 | 0 | 0 | 0 | 0 | 0 | hsa-miR-647 | -0.07 | N/A | Sites in UTR |
| DCUN1D5 | NM_032299    | DCN1, defective in cullin neddylation 1, domain containing 5 ( <i>S. cerevisiae</i> ) | 0 | 0 | 0 | 0 | 1 | 0 | 1 | 0 | hsa-miR-647 | -0.07 | N/A | Sites in UTR |
| ARVCF   | NM_001670    | armadillo repeat gene deleted in velocardiofacial syndrome                            | 0 | 0 | 0 | 0 | 1 | 0 | 0 | 1 | hsa-miR-647 | -0.07 | N/A | Sites in UTR |
| VAMP4   | NM_001185127 | vesicle-associated membrane protein 4                                                 | 0 | 0 | 0 | 0 | 1 | 0 | 0 | 1 | hsa-miR-647 | -0.07 | N/A | Sites in UTR |

|          |              |                                                                                 |   |   |   |   |   |   |   |   |             |       |     |              |
|----------|--------------|---------------------------------------------------------------------------------|---|---|---|---|---|---|---|---|-------------|-------|-----|--------------|
| NRXN3    | NM_001105250 | neurexin 3                                                                      | 0 | 0 | 0 | 0 | 1 | 0 | 0 | 1 | hsa-miR-647 | -0.07 | N/A | Sites in UTR |
| GPR64    | NM_001079858 | G protein-coupled receptor 64                                                   | 0 | 0 | 0 | 0 | 1 | 0 | 0 | 1 | hsa-miR-647 | -0.07 | N/A | Sites in UTR |
| PNMAL2   | NM_020709    | PNMA-like 2                                                                     | 0 | 0 | 0 | 0 | 1 | 0 | 0 | 1 | hsa-miR-647 | -0.07 | N/A | Sites in UTR |
| ST8SIA2  | NM_006011    | ST8 alpha-N-acetyl-neuraminide alpha-2,8-sialyltransferase 2                    | 1 | 0 | 1 | 0 | 0 | 0 | 0 | 0 | hsa-miR-647 | -0.07 | N/A | Sites in UTR |
| ATG4B    | NM_013325    | ATG4 autophagy related 4 homolog B (S. cerevisiae)                              | 0 | 0 | 0 | 0 | 1 | 0 | 1 | 0 | hsa-miR-647 | -0.07 | N/A | Sites in UTR |
| BBC3     | NM_001127240 | BCL2 binding component 3                                                        | 0 | 0 | 0 | 0 | 1 | 0 | 1 | 0 | hsa-miR-647 | -0.07 | N/A | Sites in UTR |
| NPC1L1   | NM_001101648 | NPC1 (Niemann-Pick disease, type C1, gene)-like 1                               | 0 | 0 | 0 | 0 | 1 | 0 | 1 | 0 | hsa-miR-647 | -0.07 | N/A | Sites in UTR |
| DIP2B    | NM_173602    | DIP2 disco-interacting protein 2 homolog B (Drosophila)                         | 0 | 0 | 0 | 0 | 1 | 0 | 1 | 0 | hsa-miR-647 | -0.07 | N/A | Sites in UTR |
| MAP3K14  | NM_003954    | mitogen-activated protein kinase kinase kinase 14                               | 0 | 0 | 0 | 0 | 1 | 0 | 0 | 1 | hsa-miR-647 | -0.07 | N/A | Sites in UTR |
| ZNF365   | NM_199451    | zinc finger protein 365                                                         | 0 | 0 | 0 | 0 | 1 | 0 | 0 | 1 | hsa-miR-647 | -0.07 | N/A | Sites in UTR |
| AHCYL2   | NM_001130720 | adenosylhomocysteinase-like 2                                                   | 0 | 0 | 0 | 0 | 1 | 0 | 0 | 1 | hsa-miR-647 | -0.07 | N/A | Sites in UTR |
| EIF2AK1  | NM_001134335 | eukaryotic translation initiation factor 2-alpha kinase 1                       | 0 | 0 | 0 | 0 | 1 | 0 | 0 | 1 | hsa-miR-647 | -0.07 | N/A | Sites in UTR |
| MAP7D3   | NM_001173516 | MAP7 domain containing 3                                                        | 0 | 0 | 0 | 0 | 1 | 0 | 0 | 1 | hsa-miR-647 | -0.07 | N/A | Sites in UTR |
| ANKRD13A | NM_033121    | ankyrin repeat domain 13A                                                       | 0 | 0 | 0 | 0 | 1 | 0 | 0 | 1 | hsa-miR-647 | -0.07 | N/A | Sites in UTR |
| B3GNT6   | NM_138706    | UDP-GlcNAc:betaGal beta-1,3-N-acetylglucosaminyltransferase 6 (core 3 synthase) | 0 | 0 | 0 | 0 | 1 | 0 | 0 | 1 | hsa-miR-647 | -0.07 | N/A | Sites in UTR |
| SYNGR1   | NM_004711    | synaptogyrin 1                                                                  | 0 | 0 | 0 | 0 | 1 | 1 | 0 | 0 | hsa-miR-647 | -0.07 | N/A | Sites in UTR |
| PATL1    | NM_152716    | protein associated with topoisomerase II homolog 1 (yeast)                      | 0 | 0 | 0 | 0 | 1 | 0 | 1 | 0 | hsa-miR-647 | -0.07 | N/A | Sites in UTR |
| DGKQ     | NM_001347    | diacylglycerol kinase, theta 110kDa                                             | 0 | 0 | 0 | 0 | 1 | 0 | 0 | 1 | hsa-miR-647 | -0.07 | N/A | Sites in UTR |

|           |              |                                                           |   |   |   |   |   |   |   |   |             |       |     |              |
|-----------|--------------|-----------------------------------------------------------|---|---|---|---|---|---|---|---|-------------|-------|-----|--------------|
| ME2       | NM_001168335 | malic enzyme 2, NAD(+)-dependent, mitochondrial           | 0 | 0 | 0 | 0 | 1 | 0 | 0 | 1 | hsa-miR-647 | -0.07 | N/A | Sites in UTR |
| PCLO      | NM_014510    | piccolo (presynaptic cytomatrix protein)                  | 0 | 0 | 0 | 0 | 1 | 0 | 0 | 1 | hsa-miR-647 | -0.07 | N/A | Sites in UTR |
| SOBP      | NM_018013    | sine oculis binding protein homolog (Drosophila)          | 0 | 0 | 0 | 0 | 1 | 0 | 0 | 1 | hsa-miR-647 | -0.07 | N/A | Sites in UTR |
| MAK16     | NM_032509    | MAK16 homolog (S. cerevisiae)                             | 0 | 0 | 0 | 0 | 1 | 0 | 0 | 1 | hsa-miR-647 | -0.07 | N/A | Sites in UTR |
| ALDH7A1   | NM_001182    | aldehyde dehydrogenase 7 family, member A1                | 0 | 0 | 0 | 0 | 1 | 0 | 1 | 0 | hsa-miR-647 | -0.07 | N/A | Sites in UTR |
| ProSAPIP1 | NM_014731    | ProSAPIP1 protein                                         | 0 | 0 | 0 | 0 | 1 | 0 | 0 | 1 | hsa-miR-647 | -0.07 | N/A | Sites in UTR |
| THAP2     | NM_031435    | THAP domain containing, apoptosis associated protein 2    | 0 | 0 | 0 | 0 | 1 | 0 | 0 | 1 | hsa-miR-647 | -0.07 | N/A | Sites in UTR |
| PAR3B     | NM_057177    | par-3 partitioning defective 3 homolog B (C. elegans)     | 0 | 0 | 0 | 0 | 2 | 0 | 2 | 0 | hsa-miR-647 | -0.07 | N/A | Sites in UTR |
| UBAC2     | NM_001144072 | UBA domain containing 2                                   | 0 | 0 | 0 | 0 | 1 | 0 | 1 | 0 | hsa-miR-647 | -0.07 | N/A | Sites in UTR |
| CYP27C1   | NM_001001665 | cytochrome P450, family 27, subfamily C, polypeptide 1    | 0 | 0 | 0 | 0 | 1 | 0 | 1 | 0 | hsa-miR-647 | -0.07 | N/A | Sites in UTR |
| PPP2R3A   | NM_001190447 | protein phosphatase 2, regulatory subunit B', alpha       | 0 | 0 | 0 | 0 | 1 | 0 | 0 | 1 | hsa-miR-647 | -0.07 | N/A | Sites in UTR |
| STXBPSL   | NM_014980    | syntaxin binding protein 5-like                           | 0 | 0 | 0 | 0 | 1 | 0 | 0 | 1 | hsa-miR-647 | -0.07 | N/A | Sites in UTR |
| KIAA1755  | NM_001029864 | KIAA1755                                                  | 0 | 0 | 0 | 0 | 1 | 0 | 0 | 1 | hsa-miR-647 | -0.07 | N/A | Sites in UTR |
| AGAP2     | NM_001122772 | ArfGAP with GTPase domain, ankyrin repeat and PH domain 2 | 0 | 0 | 0 | 0 | 1 | 0 | 0 | 1 | hsa-miR-647 | -0.07 | N/A | Sites in UTR |
| NIPAL4    | NM_001099287 | NIPA-like domain containing 4                             | 0 | 0 | 0 | 0 | 1 | 0 | 0 | 1 | hsa-miR-647 | -0.07 | N/A | Sites in UTR |
| FGFR1     | NM_001174063 | fibroblast growth factor receptor 1                       | 0 | 0 | 0 | 0 | 1 | 0 | 1 | 0 | hsa-miR-647 | -0.07 | N/A | Sites in UTR |
| RPA1      | NM_002945    | replication protein A1, 70kDa                             | 0 | 0 | 0 | 0 | 1 | 0 | 1 | 0 | hsa-miR-647 | -0.07 | N/A | Sites in UTR |
| FAM115A   | NM_001206938 | family with sequence similarity 115, member A             | 0 | 0 | 0 | 0 | 1 | 0 | 0 | 1 | hsa-miR-647 | -0.07 | N/A | Sites in UTR |



|         |              |                                                                          |   |   |   |   |   |   |   |   |             |       |     |              |
|---------|--------------|--------------------------------------------------------------------------|---|---|---|---|---|---|---|---|-------------|-------|-----|--------------|
| FAM105B | NM_138348    | family with sequence similarity 105, member B                            | 0 | 0 | 0 | 0 | 1 | 0 | 0 | 1 | hsa-miR-647 | -0.07 | N/A | Sites in UTR |
| SDK1    | NM_152744    | sidekick homolog 1, cell adhesion molecule (chicken)                     | 0 | 0 | 0 | 0 | 2 | 0 | 2 | 0 | hsa-miR-647 | -0.07 | N/A | Sites in UTR |
| THEM4   | NM_053055    | thioesterase superfamily member 4                                        | 0 | 0 | 0 | 0 | 2 | 0 | 0 | 2 | hsa-miR-647 | -0.07 | N/A | Sites in UTR |
| GRB10   | NM_001001549 | growth factor receptor-bound protein 10                                  | 0 | 0 | 0 | 0 | 1 | 0 | 1 | 0 | hsa-miR-647 | -0.07 | N/A | Sites in UTR |
| PSKH1   | NM_006742    | protein serine kinase H1                                                 | 0 | 0 | 0 | 0 | 1 | 0 | 0 | 1 | hsa-miR-647 | -0.07 | N/A | Sites in UTR |
| PNPLA4  | NM_001142389 | patatin-like phospholipase domain containing 4                           | 0 | 0 | 0 | 0 | 1 | 0 | 0 | 1 | hsa-miR-647 | -0.07 | N/A | Sites in UTR |
| RXFP3   | NM_016568    | relaxin/insulin-like family peptide receptor 3                           | 0 | 0 | 0 | 0 | 1 | 0 | 0 | 1 | hsa-miR-647 | -0.07 | N/A | Sites in UTR |
| DTL     | NM_016448    | denticleless homolog (Drosophila)                                        | 0 | 0 | 0 | 0 | 1 | 0 | 0 | 1 | hsa-miR-647 | -0.07 | N/A | Sites in UTR |
| RAB23   | NM_016277    | RAB23, member RAS oncogene family                                        | 0 | 0 | 0 | 0 | 1 | 0 | 0 | 1 | hsa-miR-647 | -0.07 | N/A | Sites in UTR |
| CPLX3   | NM_001030005 | complexin 3                                                              | 0 | 0 | 0 | 0 | 1 | 0 | 0 | 1 | hsa-miR-647 | -0.07 | N/A | Sites in UTR |
| C1orf95 | NM_001003665 | chromosome 1 open reading frame 95                                       | 0 | 0 | 0 | 0 | 2 | 0 | 2 | 0 | hsa-miR-647 | -0.06 | N/A | Sites in UTR |
| DPM2    | NM_003863    | dolichyl-phosphate mannosyltransferase polypeptide 2, regulatory subunit | 0 | 0 | 0 | 0 | 1 | 0 | 1 | 0 | hsa-miR-647 | -0.06 | N/A | Sites in UTR |
| CADM1   | NM_001098517 | cell adhesion molecule 1                                                 | 0 | 0 | 0 | 0 | 1 | 0 | 1 | 0 | hsa-miR-647 | -0.06 | N/A | Sites in UTR |
| RELT    | NM_032871    | RELT tumor necrosis factor receptor                                      | 0 | 0 | 0 | 0 | 1 | 0 | 1 | 0 | hsa-miR-647 | -0.06 | N/A | Sites in UTR |
| ZNF555  | NM_001172775 | zinc finger protein 555                                                  | 0 | 0 | 0 | 0 | 1 | 0 | 1 | 0 | hsa-miR-647 | -0.06 | N/A | Sites in UTR |
| ZCCHC24 | NM_153367    | zinc finger, CCHC domain containing 24                                   | 1 | 0 | 1 | 0 | 0 | 0 | 0 | 0 | hsa-miR-647 | -0.06 | N/A | Sites in UTR |
| DGCR14  | NM_022719    | DiGeorge syndrome critical region gene 14                                | 0 | 0 | 0 | 0 | 1 | 0 | 0 | 1 | hsa-miR-647 | -0.06 | N/A | Sites in UTR |
| FBXO41  | NM_001080410 | F-box protein 41                                                         | 0 | 0 | 0 | 0 | 1 | 0 | 0 | 1 | hsa-miR-647 | -0.06 | N/A | Sites in UTR |

|          |              |                                                                                 |   |   |   |   |   |   |   |   |             |       |     |              |
|----------|--------------|---------------------------------------------------------------------------------|---|---|---|---|---|---|---|---|-------------|-------|-----|--------------|
| RXRA     | NM_002957    | retinoid X receptor, alpha                                                      | 0 | 0 | 0 | 0 | 2 | 0 | 2 | 0 | hsa-miR-647 | -0.06 | N/A | Sites in UTR |
| BCL2L1   | NM_001191    | BCL2-like 1                                                                     | 0 | 0 | 0 | 0 | 1 | 0 | 1 | 0 | hsa-miR-647 | -0.06 | N/A | Sites in UTR |
| PFKFB3   | NM_001145443 | 6-phosphofructo-2-kinase/fructose-2,6-biphosphatase 3                           | 0 | 0 | 0 | 0 | 1 | 0 | 1 | 0 | hsa-miR-647 | -0.06 | N/A | Sites in UTR |
| CD2BP2   | NM_006110    | CD2 (cytoplasmic tail) binding protein 2                                        | 0 | 0 | 0 | 0 | 1 | 0 | 1 | 0 | hsa-miR-647 | -0.06 | N/A | Sites in UTR |
| ESYT2    | NM_020728    | extended synaptotagmin-like protein 2                                           | 0 | 0 | 0 | 0 | 1 | 0 | 1 | 0 | hsa-miR-647 | -0.06 | N/A | Sites in UTR |
| PDDC1    | NM_182612    | Parkinson disease 7 domain containing 1                                         | 0 | 0 | 0 | 0 | 1 | 0 | 1 | 0 | hsa-miR-647 | -0.06 | N/A | Sites in UTR |
| F7       | NM_000131    | coagulation factor VII (serum prothrombin conversion accelerator)               | 0 | 0 | 0 | 0 | 1 | 0 | 0 | 1 | hsa-miR-647 | -0.06 | N/A | Sites in UTR |
| TFRC     | NM_001128148 | transferrin receptor (p90, CD71)                                                | 0 | 0 | 0 | 0 | 1 | 0 | 0 | 1 | hsa-miR-647 | -0.06 | N/A | Sites in UTR |
| JAKMIP3  | NM_001105521 | Janus kinase and microtubule interacting protein 3                              | 0 | 0 | 0 | 0 | 3 | 0 | 3 | 0 | hsa-miR-647 | -0.06 | N/A | Sites in UTR |
| CAMK2A   | NM_015981    | calcium/calmodulin-dependent protein kinase II alpha                            | 0 | 0 | 0 | 0 | 1 | 0 | 1 | 0 | hsa-miR-647 | -0.06 | N/A | Sites in UTR |
| SAP30BP  | NM_013260    | SAP30 binding protein                                                           | 0 | 0 | 0 | 0 | 1 | 0 | 1 | 0 | hsa-miR-647 | -0.06 | N/A | Sites in UTR |
| SLC2A4RG | NM_020062    | SLC2A4 regulator                                                                | 0 | 0 | 0 | 0 | 1 | 0 | 1 | 0 | hsa-miR-647 | -0.06 | N/A | Sites in UTR |
| ALPPL2   | NM_031313    | alkaline phosphatase, placental-like 2                                          | 0 | 0 | 0 | 0 | 1 | 0 | 0 | 1 | hsa-miR-647 | -0.06 | N/A | Sites in UTR |
| PKD2     | NM_001199898 | pyruvate dehydrogenase kinase, isozyme 2                                        | 0 | 0 | 0 | 0 | 1 | 0 | 0 | 1 | hsa-miR-647 | -0.06 | N/A | Sites in UTR |
| SNX6     | NM_021249    | sorting nexin 6                                                                 | 0 | 0 | 0 | 0 | 1 | 0 | 0 | 1 | hsa-miR-647 | -0.06 | N/A | Sites in UTR |
| SHISA9   | NM_001145205 | shisa homolog 9 (Xenopus laevis)                                                | 0 | 0 | 0 | 0 | 1 | 0 | 0 | 1 | hsa-miR-647 | -0.06 | N/A | Sites in UTR |
| MYCL1    | NM_001033081 | v-myc myelocytomatosis viral oncogene homolog 1, lung carcinoma derived (avian) | 0 | 0 | 0 | 0 | 1 | 0 | 1 | 0 | hsa-miR-647 | -0.06 | N/A | Sites in UTR |
| CD209    | NM_001144893 | CD209 molecule                                                                  | 0 | 0 | 0 | 0 | 1 | 0 | 1 | 0 | hsa-miR-647 | -0.06 | N/A | Sites in UTR |

|         |              |                                                                        |   |   |   |   |   |   |   |   |             |       |     |              |
|---------|--------------|------------------------------------------------------------------------|---|---|---|---|---|---|---|---|-------------|-------|-----|--------------|
| PRPF40A | NM_017892    | PRP40 pre-mRNA processing factor 40 homolog A ( <i>S. cerevisiae</i> ) | 0 | 0 | 0 | 0 | 1 | 0 | 1 | 0 | hsa-miR-647 | -0.06 | N/A | Sites in UTR |
| EFCAB2  | NM_001143943 | EF-hand calcium binding domain 2                                       | 0 | 0 | 0 | 0 | 1 | 0 | 0 | 1 | hsa-miR-647 | -0.06 | N/A | Sites in UTR |
| SNX1    | NM_003099    | sorting nexin 1                                                        | 0 | 0 | 0 | 0 | 2 | 0 | 1 | 1 | hsa-miR-647 | -0.06 | N/A | Sites in UTR |
| ADARB2  | NM_018702    | adenosine deaminase, RNA-specific, B2                                  | 0 | 0 | 0 | 0 | 1 | 0 | 1 | 0 | hsa-miR-647 | -0.06 | N/A | Sites in UTR |
| CCND1   | NM_053056    | cyclin D1                                                              | 0 | 0 | 0 | 0 | 1 | 0 | 1 | 0 | hsa-miR-647 | -0.06 | N/A | Sites in UTR |
| CCNT2   | NM_001241    | cyclin T2                                                              | 1 | 0 | 1 | 0 | 0 | 0 | 0 | 0 | hsa-miR-647 | -0.06 | N/A | Sites in UTR |
| MDFI    | NM_005586    | MyoD family inhibitor                                                  | 0 | 0 | 0 | 0 | 1 | 0 | 1 | 0 | hsa-miR-647 | -0.06 | N/A | Sites in UTR |
| INTS6   | NM_001039937 | integrator complex subunit 6                                           | 0 | 0 | 0 | 0 | 1 | 0 | 1 | 0 | hsa-miR-647 | -0.06 | N/A | Sites in UTR |
| FBXL20  | NM_001184906 | F-box and leucine-rich repeat protein 20                               | 0 | 0 | 0 | 0 | 1 | 0 | 1 | 0 | hsa-miR-647 | -0.06 | N/A | Sites in UTR |
| CYB5RL  | NM_001031672 | cytochrome b5 reductase-like                                           | 1 | 0 | 1 | 0 | 0 | 0 | 0 | 0 | hsa-miR-647 | -0.06 | N/A | Sites in UTR |
| ABCD1   | NM_000033    | ATP-binding cassette, sub-family D (ALD), member 1                     | 0 | 0 | 0 | 0 | 1 | 0 | 0 | 1 | hsa-miR-647 | -0.06 | N/A | Sites in UTR |
| POU2F1  | NM_001198783 | POU class 2 homeobox 1                                                 | 1 | 0 | 0 | 1 | 0 | 0 | 0 | 0 | hsa-miR-647 | -0.06 | N/A | Sites in UTR |
| SEC63   | NM_007214    | SEC63 homolog ( <i>S. cerevisiae</i> )                                 | 0 | 0 | 0 | 0 | 1 | 0 | 0 | 1 | hsa-miR-647 | -0.06 | N/A | Sites in UTR |
| TMEM79  | NM_032323    | transmembrane protein 79                                               | 0 | 0 | 0 | 0 | 1 | 0 | 0 | 1 | hsa-miR-647 | -0.06 | N/A | Sites in UTR |
| RAB3IP  | NM_001024647 | RAB3A interacting protein (rabin3)                                     | 0 | 0 | 0 | 0 | 1 | 0 | 0 | 1 | hsa-miR-647 | -0.06 | N/A | Sites in UTR |
| CRAMP1L | NM_020825    | Crm, cramped-like ( <i>Drosophila</i> )                                | 0 | 0 | 0 | 0 | 2 | 1 | 1 | 0 | hsa-miR-647 | -0.06 | N/A | Sites in UTR |
| AK4     | NM_001005353 | adenylate kinase 4                                                     | 0 | 0 | 0 | 0 | 1 | 1 | 0 | 0 | hsa-miR-647 | -0.06 | N/A | Sites in UTR |
| MPPED2  | NM_001145399 | metallophosphoesterase domain containing 2                             | 0 | 0 | 0 | 0 | 1 | 0 | 1 | 0 | hsa-miR-647 | -0.06 | N/A | Sites in UTR |

|          |              |                                                                                          |   |   |   |   |   |   |   |   |             |       |     |              |
|----------|--------------|------------------------------------------------------------------------------------------|---|---|---|---|---|---|---|---|-------------|-------|-----|--------------|
| SNED1    | NM_001080437 | sushi, nidogen and EGF-like domains 1                                                    | 0 | 0 | 0 | 0 | 1 | 0 | 1 | 0 | hsa-miR-647 | -0.06 | N/A | Sites in UTR |
| PAG1     | NM_018440    | phosphoprotein associated with glycosphingolipid microdomains 1                          | 0 | 0 | 0 | 0 | 1 | 0 | 1 | 0 | hsa-miR-647 | -0.06 | N/A | Sites in UTR |
| FLYWCH1  | NM_032296    | FLYWCH-type zinc finger 1                                                                | 0 | 0 | 0 | 0 | 1 | 0 | 1 | 0 | hsa-miR-647 | -0.06 | N/A | Sites in UTR |
| TSPAN18  | NM_130783    | tetraspanin 18                                                                           | 0 | 0 | 0 | 0 | 1 | 0 | 1 | 0 | hsa-miR-647 | -0.06 | N/A | Sites in UTR |
| ADAMTSL1 | NM_001040272 | ADAMTS-like 1                                                                            | 0 | 0 | 0 | 0 | 1 | 0 | 1 | 0 | hsa-miR-647 | -0.06 | N/A | Sites in UTR |
| NPR3     | NM_000908    | natriuretic peptide receptor C/guanylate cyclase C (atrionatriuretic peptide receptor C) | 0 | 0 | 0 | 0 | 1 | 0 | 0 | 1 | hsa-miR-647 | -0.06 | N/A | Sites in UTR |
| PIK3R1   | NM_001242466 | phosphoinositide-3-kinase, regulatory subunit 1 (alpha)                                  | 0 | 0 | 0 | 0 | 1 | 0 | 0 | 1 | hsa-miR-647 | -0.06 | N/A | Sites in UTR |
| TGM2     | NM_004613    | transglutaminase 2 (C polypeptide, protein-glutamine-gamma-glutamyltransferase)          | 0 | 0 | 0 | 0 | 1 | 0 | 0 | 1 | hsa-miR-647 | -0.06 | N/A | Sites in UTR |
| ZNF107   | NM_001013746 | zinc finger protein 107                                                                  | 0 | 0 | 0 | 0 | 1 | 0 | 0 | 1 | hsa-miR-647 | -0.06 | N/A | Sites in UTR |
| SCAI     | NM_001144877 | suppressor of cancer cell invasion                                                       | 0 | 0 | 0 | 0 | 1 | 0 | 0 | 1 | hsa-miR-647 | -0.06 | N/A | Sites in UTR |
| GPC1     | NM_002081    | glypican 1                                                                               | 0 | 0 | 0 | 0 | 1 | 0 | 1 | 0 | hsa-miR-647 | -0.06 | N/A | Sites in UTR |
| PCDHGC3  | NM_002588    | protocadherin gamma subfamily C, 3                                                       | 0 | 0 | 0 | 0 | 1 | 0 | 1 | 0 | hsa-miR-647 | -0.06 | N/A | Sites in UTR |
| SEL1L    | NM_005065    | sel-1 suppressor of lin-12-like (C. elegans)                                             | 0 | 0 | 0 | 0 | 1 | 0 | 1 | 0 | hsa-miR-647 | -0.06 | N/A | Sites in UTR |
| PCDHGB4  | NM_003736    | protocadherin gamma subfamily B, 4                                                       | 0 | 0 | 0 | 0 | 1 | 0 | 1 | 0 | hsa-miR-647 | -0.06 | N/A | Sites in UTR |
| PCDHGA8  | NM_032088    | protocadherin gamma subfamily A, 8                                                       | 0 | 0 | 0 | 0 | 1 | 0 | 1 | 0 | hsa-miR-647 | -0.06 | N/A | Sites in UTR |
| PCDHGA12 | NM_003735    | protocadherin gamma subfamily A, 12                                                      | 0 | 0 | 0 | 0 | 1 | 0 | 1 | 0 | hsa-miR-647 | -0.06 | N/A | Sites in UTR |
| PCDHGC5  | NM_018929    | protocadherin gamma subfamily C, 5                                                       | 0 | 0 | 0 | 0 | 1 | 0 | 1 | 0 | hsa-miR-647 | -0.06 | N/A | Sites in UTR |
| PCDHGC4  | NM_018928    | protocadherin gamma subfamily C, 4                                                       | 0 | 0 | 0 | 0 | 1 | 0 | 1 | 0 | hsa-miR-647 | -0.06 | N/A | Sites in UTR |

|          |           |                                     |   |   |   |   |   |   |   |   |             |       |     |              |
|----------|-----------|-------------------------------------|---|---|---|---|---|---|---|---|-------------|-------|-----|--------------|
| PCDHGB7  | NM_018927 | protocadherin gamma subfamily B, 7  | 0 | 0 | 0 | 0 | 1 | 0 | 1 | 0 | hsa-miR-647 | -0.06 | N/A | Sites in UTR |
| PCDHGB6  | NM_018926 | protocadherin gamma subfamily B, 6  | 0 | 0 | 0 | 0 | 1 | 0 | 1 | 0 | hsa-miR-647 | -0.06 | N/A | Sites in UTR |
| PCDHGB5  | NM_018925 | protocadherin gamma subfamily B, 5  | 0 | 0 | 0 | 0 | 1 | 0 | 1 | 0 | hsa-miR-647 | -0.06 | N/A | Sites in UTR |
| PCDHGB3  | NM_018924 | protocadherin gamma subfamily B, 3  | 0 | 0 | 0 | 0 | 1 | 0 | 1 | 0 | hsa-miR-647 | -0.06 | N/A | Sites in UTR |
| PCDHGB2  | NM_018923 | protocadherin gamma subfamily B, 2  | 0 | 0 | 0 | 0 | 1 | 0 | 1 | 0 | hsa-miR-647 | -0.06 | N/A | Sites in UTR |
| PCDHGB1  | NM_018922 | protocadherin gamma subfamily B, 1  | 0 | 0 | 0 | 0 | 1 | 0 | 1 | 0 | hsa-miR-647 | -0.06 | N/A | Sites in UTR |
| PCDHGA11 | NM_018914 | protocadherin gamma subfamily A, 11 | 0 | 0 | 0 | 0 | 1 | 0 | 1 | 0 | hsa-miR-647 | -0.06 | N/A | Sites in UTR |
| PCDHGA10 | NM_018913 | protocadherin gamma subfamily A, 10 | 0 | 0 | 0 | 0 | 1 | 0 | 1 | 0 | hsa-miR-647 | -0.06 | N/A | Sites in UTR |
| PCDHGA9  | NM_018921 | protocadherin gamma subfamily A, 9  | 0 | 0 | 0 | 0 | 1 | 0 | 1 | 0 | hsa-miR-647 | -0.06 | N/A | Sites in UTR |
| PCDHGA7  | NM_018920 | protocadherin gamma subfamily A, 7  | 0 | 0 | 0 | 0 | 1 | 0 | 1 | 0 | hsa-miR-647 | -0.06 | N/A | Sites in UTR |
| PCDHGA6  | NM_018919 | protocadherin gamma subfamily A, 6  | 0 | 0 | 0 | 0 | 1 | 0 | 1 | 0 | hsa-miR-647 | -0.06 | N/A | Sites in UTR |
| PCDHGA5  | NM_018918 | protocadherin gamma subfamily A, 5  | 0 | 0 | 0 | 0 | 1 | 0 | 1 | 0 | hsa-miR-647 | -0.06 | N/A | Sites in UTR |
| PCDHGA4  | NM_018917 | protocadherin gamma subfamily A, 4  | 0 | 0 | 0 | 0 | 1 | 0 | 1 | 0 | hsa-miR-647 | -0.06 | N/A | Sites in UTR |
| PCDHGA3  | NM_018916 | protocadherin gamma subfamily A, 3  | 0 | 0 | 0 | 0 | 1 | 0 | 1 | 0 | hsa-miR-647 | -0.06 | N/A | Sites in UTR |
| PCDHGA2  | NM_018915 | protocadherin gamma subfamily A, 2  | 0 | 0 | 0 | 0 | 1 | 0 | 1 | 0 | hsa-miR-647 | -0.06 | N/A | Sites in UTR |
| PCDHGA1  | NM_018912 | protocadherin gamma subfamily A, 1  | 0 | 0 | 0 | 0 | 1 | 0 | 1 | 0 | hsa-miR-647 | -0.06 | N/A | Sites in UTR |
| CD44     | NM_000610 | CD44 molecule (Indian blood group)  | 0 | 0 | 0 | 0 | 1 | 0 | 0 | 1 | hsa-miR-647 | -0.06 | N/A | Sites in UTR |
| EPHA4    | NM_004438 | EPH receptor A4                     | 0 | 0 | 0 | 0 | 1 | 0 | 0 | 1 | hsa-miR-647 | -0.06 | N/A | Sites in UTR |

|         |              |                                                                                       |   |   |   |   |   |   |   |   |             |       |     |              |
|---------|--------------|---------------------------------------------------------------------------------------|---|---|---|---|---|---|---|---|-------------|-------|-----|--------------|
| IGF1R   | NM_000875    | insulin-like growth factor 1 receptor                                                 | 0 | 0 | 0 | 0 | 1 | 0 | 0 | 1 | hsa-miR-647 | -0.06 | N/A | Sites in UTR |
| THSD4   | NM_024817    | thrombospondin, type I, domain containing 4                                           | 0 | 0 | 0 | 0 | 1 | 0 | 0 | 1 | hsa-miR-647 | -0.06 | N/A | Sites in UTR |
| SHE     | NM_001010846 | Src homology 2 domain containing E                                                    | 0 | 0 | 0 | 0 | 2 | 0 | 1 | 1 | hsa-miR-647 | -0.06 | N/A | Sites in UTR |
| TRAF7   | NM_032271    | TNF receptor-associated factor 7                                                      | 0 | 0 | 0 | 0 | 1 | 0 | 1 | 0 | hsa-miR-647 | -0.06 | N/A | Sites in UTR |
| ZBTB34  | NM_001099270 | zinc finger and BTB domain containing 34                                              | 0 | 0 | 0 | 0 | 1 | 0 | 1 | 0 | hsa-miR-647 | -0.06 | N/A | Sites in UTR |
| CBFA2T3 | NM_005187    | core-binding factor, runt domain, alpha subunit 2; translocated to, 3                 | 1 | 0 | 0 | 1 | 0 | 0 | 0 | 0 | hsa-miR-647 | -0.06 | N/A | Sites in UTR |
| ERCC6   | NM_000124    | excision repair cross-complementing rodent repair deficiency, complementation group 6 | 0 | 0 | 0 | 0 | 1 | 0 | 0 | 1 | hsa-miR-647 | -0.06 | N/A | Sites in UTR |
| FZD5    | NM_003468    | frizzled family receptor 5                                                            | 0 | 0 | 0 | 0 | 1 | 0 | 0 | 1 | hsa-miR-647 | -0.06 | N/A | Sites in UTR |
| CNNM1   | NM_020348    | cyclin M1                                                                             | 1 | 0 | 0 | 1 | 0 | 0 | 0 | 0 | hsa-miR-647 | -0.06 | N/A | Sites in UTR |
| WDR36   | NM_139281    | WD repeat domain 36                                                                   | 0 | 0 | 0 | 0 | 1 | 0 | 0 | 1 | hsa-miR-647 | -0.06 | N/A | Sites in UTR |
| SLC7A6  | NM_001076785 | solute carrier family 7 (amino acid transporter light chain, y+L system), member 6    | 0 | 0 | 0 | 0 | 1 | 0 | 1 | 0 | hsa-miR-647 | -0.06 | N/A | Sites in UTR |
| MYO1D   | NM_015194    | myosin ID                                                                             | 0 | 0 | 0 | 0 | 1 | 0 | 0 | 1 | hsa-miR-647 | -0.06 | N/A | Sites in UTR |
| DLL4    | NM_019074    | delta-like 4 (Drosophila)                                                             | 0 | 0 | 0 | 0 | 1 | 0 | 0 | 1 | hsa-miR-647 | -0.06 | N/A | Sites in UTR |
| ZNF557  | NM_001044387 | zinc finger protein 557                                                               | 0 | 0 | 0 | 0 | 1 | 0 | 0 | 1 | hsa-miR-647 | -0.06 | N/A | Sites in UTR |
| KIF24   | NM_194313    | kinesin family member 24                                                              | 0 | 0 | 0 | 0 | 1 | 0 | 0 | 1 | hsa-miR-647 | -0.06 | N/A | Sites in UTR |
| CUX1    | NM_001202543 | cut-like homeobox 1                                                                   | 0 | 0 | 0 | 0 | 2 | 0 | 1 | 1 | hsa-miR-647 | -0.06 | N/A | Sites in UTR |
| ZNRF1   | NM_032268    | zinc and ring finger 1                                                                | 0 | 0 | 0 | 0 | 1 | 0 | 1 | 0 | hsa-miR-647 | -0.06 | N/A | Sites in UTR |
| HUS1    | NM_004507    | HUS1 checkpoint homolog (S. pombe)                                                    | 0 | 0 | 0 | 0 | 1 | 0 | 0 | 1 | hsa-miR-647 | -0.06 | N/A | Sites in UTR |

|         |              |                                                                             |   |   |   |   |   |   |   |   |             |       |     |              |
|---------|--------------|-----------------------------------------------------------------------------|---|---|---|---|---|---|---|---|-------------|-------|-----|--------------|
| PPP2R2C | NM_001206994 | protein phosphatase 2, regulatory subunit B, gamma                          | 0 | 0 | 0 | 0 | 1 | 0 | 0 | 1 | hsa-miR-647 | -0.06 | N/A | Sites in UTR |
| SLC33A1 | NM_004733    | solute carrier family 33 (acetyl-CoA transporter), member 1                 | 0 | 0 | 0 | 0 | 1 | 0 | 0 | 1 | hsa-miR-647 | -0.06 | N/A | Sites in UTR |
| PLEKHF1 | NM_024310    | pleckstrin homology domain containing, family F (with FYVE domain) member 1 | 0 | 0 | 0 | 0 | 1 | 0 | 0 | 1 | hsa-miR-647 | -0.06 | N/A | Sites in UTR |
| DGAT1   | NM_012079    | diacylglycerol O-acyltransferase 1                                          | 0 | 0 | 0 | 0 | 1 | 0 | 1 | 0 | hsa-miR-647 | -0.05 | N/A | Sites in UTR |
| VASH1   | NM_014909    | vasohibin 1                                                                 | 0 | 0 | 0 | 0 | 1 | 0 | 1 | 0 | hsa-miR-647 | -0.05 | N/A | Sites in UTR |
| ZC3H4   | NM_015168    | zinc finger CCCH-type containing 4                                          | 0 | 0 | 0 | 0 | 1 | 0 | 1 | 0 | hsa-miR-647 | -0.05 | N/A | Sites in UTR |
| GLIS2   | NM_032575    | GLIS family zinc finger 2                                                   | 0 | 0 | 0 | 0 | 1 | 0 | 1 | 0 | hsa-miR-647 | -0.05 | N/A | Sites in UTR |
| POU2AF1 | NM_006235    | POU class 2 associating factor 1                                            | 0 | 0 | 0 | 0 | 1 | 0 | 0 | 1 | hsa-miR-647 | -0.05 | N/A | Sites in UTR |
| SCRN1   | NM_001145513 | secernin 1                                                                  | 0 | 0 | 0 | 0 | 1 | 0 | 0 | 1 | hsa-miR-647 | -0.05 | N/A | Sites in UTR |
| TMEM47  | NM_031442    | transmembrane protein 47                                                    | 0 | 0 | 0 | 0 | 1 | 0 | 0 | 1 | hsa-miR-647 | -0.05 | N/A | Sites in UTR |
| ZNF862  | NM_001099220 | zinc finger protein 862                                                     | 0 | 0 | 0 | 0 | 1 | 0 | 0 | 1 | hsa-miR-647 | -0.05 | N/A | Sites in UTR |
| ERC1    | NM_178039    | ELKS/RAB6-interacting/CAST family member 1                                  | 0 | 0 | 0 | 0 | 1 | 0 | 1 | 0 | hsa-miR-647 | -0.05 | N/A | Sites in UTR |
| IQCE    | NM_001100390 | IQ motif containing E                                                       | 0 | 0 | 0 | 0 | 1 | 0 | 1 | 0 | hsa-miR-647 | -0.05 | N/A | Sites in UTR |
| DAB2IP  | NM_032552    | DAB2 interacting protein                                                    | 0 | 0 | 0 | 0 | 1 | 0 | 1 | 0 | hsa-miR-647 | -0.05 | N/A | Sites in UTR |
| ADD2    | NM_001185055 | adducin 2 (beta)                                                            | 0 | 0 | 0 | 0 | 1 | 0 | 0 | 1 | hsa-miR-647 | -0.05 | N/A | Sites in UTR |
| PGR     | NM_000926    | progesterone receptor                                                       | 0 | 0 | 0 | 0 | 1 | 0 | 0 | 1 | hsa-miR-647 | -0.05 | N/A | Sites in UTR |
| FGD6    | NM_018351    | FYVE, RhoGEF and PH domain containing 6                                     | 0 | 0 | 0 | 0 | 1 | 0 | 0 | 1 | hsa-miR-647 | -0.05 | N/A | Sites in UTR |
| MPP2    | NM_005374    | membrane protein, palmitoylated 2 (MAGUK p55 subfamily member 2)            | 0 | 0 | 0 | 0 | 2 | 0 | 1 | 1 | hsa-miR-647 | -0.05 | N/A | Sites in UTR |

|          |              |                                                                  |   |   |   |   |   |   |   |   |             |       |     |              |
|----------|--------------|------------------------------------------------------------------|---|---|---|---|---|---|---|---|-------------|-------|-----|--------------|
| PRKCB    | NM_002738    | protein kinase C, beta                                           | 0 | 0 | 0 | 0 | 1 | 0 | 1 | 0 | hsa-miR-647 | -0.05 | N/A | Sites in UTR |
| GRIP2    | NM_001080423 | glutamate receptor interacting protein 2                         | 0 | 0 | 0 | 0 | 1 | 0 | 1 | 0 | hsa-miR-647 | -0.05 | N/A | Sites in UTR |
| SETD7    | NM_030648    | SET domain containing (lysine methyltransferase) 7               | 0 | 0 | 0 | 0 | 1 | 0 | 1 | 0 | hsa-miR-647 | -0.05 | N/A | Sites in UTR |
| PDE4D    | NM_001104631 | phosphodiesterase 4D, cAMP-specific                              | 0 | 0 | 0 | 0 | 1 | 0 | 0 | 1 | hsa-miR-647 | -0.05 | N/A | Sites in UTR |
| PPP6C    | NM_001123355 | protein phosphatase 6, catalytic subunit                         | 0 | 0 | 0 | 0 | 1 | 0 | 0 | 1 | hsa-miR-647 | -0.05 | N/A | Sites in UTR |
| CADM2    | NM_001167674 | cell adhesion molecule 2                                         | 0 | 0 | 0 | 0 | 1 | 0 | 0 | 1 | hsa-miR-647 | -0.05 | N/A | Sites in UTR |
| GK5      | NM_001039547 | glycerol kinase 5 (putative)                                     | 0 | 0 | 0 | 0 | 2 | 0 | 0 | 2 | hsa-miR-647 | -0.05 | N/A | Sites in UTR |
| MAFF     | NM_001161572 | v-maf musculoaponeurotic fibrosarcoma oncogene homolog F (avian) | 0 | 0 | 0 | 0 | 1 | 0 | 1 | 0 | hsa-miR-647 | -0.05 | N/A | Sites in UTR |
| PGPEP1   | NM_017712    | pyroglutamyl-peptidase I                                         | 0 | 0 | 0 | 0 | 1 | 0 | 1 | 0 | hsa-miR-647 | -0.05 | N/A | Sites in UTR |
| ZNF471   | NM_020813    | zinc finger protein 471                                          | 0 | 0 | 0 | 0 | 1 | 0 | 1 | 0 | hsa-miR-647 | -0.05 | N/A | Sites in UTR |
| TOR1AIP2 | NM_022347    | torsin A interacting protein 2                                   | 0 | 0 | 0 | 0 | 1 | 0 | 1 | 0 | hsa-miR-647 | -0.05 | N/A | Sites in UTR |
| MTX3     | NM_001010891 | metaxin 3                                                        | 0 | 0 | 0 | 0 | 1 | 0 | 1 | 0 | hsa-miR-647 | -0.05 | N/A | Sites in UTR |
| MGA      | NM_001080541 | MAX gene associated                                              | 0 | 0 | 0 | 0 | 1 | 0 | 0 | 1 | hsa-miR-647 | -0.05 | N/A | Sites in UTR |
| NUCKS1   | NM_022731    | nuclear casein kinase and cyclin-dependent kinase substrate 1    | 0 | 0 | 0 | 0 | 1 | 0 | 0 | 1 | hsa-miR-647 | -0.05 | N/A | Sites in UTR |
| CMTM3    | NM_144601    | CKLF-like MARVEL transmembrane domain containing 3               | 0 | 0 | 0 | 0 | 1 | 0 | 0 | 1 | hsa-miR-647 | -0.05 | N/A | Sites in UTR |
| CABP7    | NM_182527    | calcium binding protein 7                                        | 0 | 0 | 0 | 0 | 1 | 0 | 0 | 1 | hsa-miR-647 | -0.05 | N/A | Sites in UTR |
| CNTN2    | NM_005076    | contactin 2 (axonal)                                             | 0 | 0 | 0 | 0 | 2 | 0 | 0 | 2 | hsa-miR-647 | -0.05 | N/A | Sites in UTR |
| GPR26    | NM_153442    | G protein-coupled receptor 26                                    | 0 | 0 | 0 | 0 | 2 | 0 | 1 | 1 | hsa-miR-647 | -0.05 | N/A | Sites in UTR |



|          |              |                                                                     |   |   |   |   |   |   |   |   |             |       |     |              |
|----------|--------------|---------------------------------------------------------------------|---|---|---|---|---|---|---|---|-------------|-------|-----|--------------|
| MYO9B    | NM_001130065 | myosin IXB                                                          | 0 | 0 | 0 | 0 | 1 | 0 | 1 | 0 | hsa-miR-647 | -0.05 | N/A | Sites in UTR |
| SLC25A44 | NM_014655    | solute carrier family 25, member 44                                 | 0 | 0 | 0 | 0 | 1 | 0 | 1 | 0 | hsa-miR-647 | -0.05 | N/A | Sites in UTR |
| TPM4     | NM_001145160 | tropomyosin 4                                                       | 0 | 0 | 0 | 0 | 1 | 0 | 0 | 1 | hsa-miR-647 | -0.05 | N/A | Sites in UTR |
| ZNF84    | NM_001127372 | zinc finger protein 84                                              | 0 | 0 | 0 | 0 | 1 | 0 | 0 | 1 | hsa-miR-647 | -0.05 | N/A | Sites in UTR |
| C7orf51  | NM_173564    | chromosome 7 open reading frame 51                                  | 0 | 0 | 0 | 0 | 1 | 0 | 0 | 1 | hsa-miR-647 | -0.05 | N/A | Sites in UTR |
| TBL1X    | NM_001139466 | transducin (beta)-like 1X-linked                                    | 0 | 0 | 0 | 0 | 2 | 0 | 2 | 0 | hsa-miR-647 | -0.05 | N/A | Sites in UTR |
| WNT4     | NM_030761    | wingless-type MMTV integration site family, member 4                | 0 | 0 | 0 | 0 | 2 | 0 | 0 | 2 | hsa-miR-647 | -0.05 | N/A | Sites in UTR |
| FXN      | NM_000144    | frataxin                                                            | 0 | 0 | 0 | 0 | 1 | 0 | 1 | 0 | hsa-miR-647 | -0.05 | N/A | Sites in UTR |
| SPECC1L  | NM_001145468 | sperm antigen with calponin homology and coiled-coil domains 1-like | 0 | 0 | 0 | 0 | 1 | 0 | 1 | 0 | hsa-miR-647 | -0.05 | N/A | Sites in UTR |
| HEYL     | NM_014571    | hairy/enhancer-of-split related with YRPW motif-like                | 1 | 0 | 0 | 1 | 1 | 0 | 0 | 1 | hsa-miR-647 | -0.05 | N/A | Sites in UTR |
| GAB3     | NM_001081573 | GRB2-associated binding protein 3                                   | 0 | 0 | 0 | 0 | 1 | 0 | 0 | 1 | hsa-miR-647 | -0.05 | N/A | Sites in UTR |
| ZNF710   | NM_198526    | zinc finger protein 710                                             | 0 | 0 | 0 | 0 | 2 | 0 | 1 | 1 | hsa-miR-647 | -0.05 | N/A | Sites in UTR |
| ZFP14    | NM_020917    | zinc finger protein 14 homolog (mouse)                              | 0 | 0 | 0 | 0 | 2 | 0 | 0 | 2 | hsa-miR-647 | -0.05 | N/A | Sites in UTR |
| DHCR24   | NM_014762    | 24-dehydrocholesterol reductase                                     | 0 | 0 | 0 | 0 | 1 | 0 | 1 | 0 | hsa-miR-647 | -0.05 | N/A | Sites in UTR |
| LIMS1    | NM_001193482 | LIM and senescent cell antigen-like domains 1                       | 0 | 0 | 0 | 0 | 1 | 0 | 1 | 0 | hsa-miR-647 | -0.05 | N/A | Sites in UTR |
| PARVA    | NM_018222    | parvin, alpha                                                       | 0 | 0 | 0 | 0 | 1 | 0 | 1 | 0 | hsa-miR-647 | -0.05 | N/A | Sites in UTR |
| POM121C  | NM_001099415 | POM121 membrane glycoprotein C                                      | 0 | 0 | 0 | 0 | 1 | 0 | 1 | 0 | hsa-miR-647 | -0.05 | N/A | Sites in UTR |
| STARD13  | NM_052851    | StAR-related lipid transfer (START) domain containing 13            | 0 | 0 | 0 | 0 | 1 | 0 | 0 | 1 | hsa-miR-647 | -0.05 | N/A | Sites in UTR |

|          |              |                                                               |   |   |   |   |   |   |   |   |             |       |     |              |
|----------|--------------|---------------------------------------------------------------|---|---|---|---|---|---|---|---|-------------|-------|-----|--------------|
| DMWD     | NM_004943    | dystrophia myotonica, WD repeat containing                    | 0 | 0 | 0 | 0 | 1 | 0 | 1 | 0 | hsa-miR-647 | -0.05 | N/A | Sites in UTR |
| PGP      | NM_001042371 | phosphoglycolate phosphatase                                  | 0 | 0 | 0 | 0 | 1 | 0 | 1 | 0 | hsa-miR-647 | -0.05 | N/A | Sites in UTR |
| GNL3L    | NM_001184819 | guanine nucleotide binding protein-like 3 (nucleolar)-like    | 0 | 0 | 0 | 0 | 1 | 0 | 0 | 1 | hsa-miR-647 | -0.05 | N/A | Sites in UTR |
| SNX21    | NM_001042632 | sorting nexin family member 21                                | 0 | 0 | 0 | 0 | 1 | 0 | 0 | 1 | hsa-miR-647 | -0.05 | N/A | Sites in UTR |
| H2AFV    | NM_138635    | H2A histone family, member V                                  | 0 | 0 | 0 | 0 | 1 | 0 | 0 | 1 | hsa-miR-647 | -0.05 | N/A | Sites in UTR |
| APAF1    | NM_001160    | apoptotic peptidase activating factor 1                       | 0 | 0 | 0 | 0 | 1 | 0 | 0 | 1 | hsa-miR-647 | -0.04 | N/A | Sites in UTR |
| RBFOX2   | NM_001031695 | RNA binding protein, fox-1 homolog (C. elegans) 2             | 0 | 0 | 0 | 0 | 1 | 0 | 0 | 1 | hsa-miR-647 | -0.04 | N/A | Sites in UTR |
| SHANK2   | NM_012309    | SH3 and multiple ankyrin repeat domains 2                     | 0 | 0 | 0 | 0 | 2 | 0 | 1 | 1 | hsa-miR-647 | -0.04 | N/A | Sites in UTR |
| AFF2     | NM_001169122 | AF4/FMR2 family, member 2                                     | 0 | 0 | 0 | 0 | 1 | 0 | 1 | 0 | hsa-miR-647 | -0.04 | N/A | Sites in UTR |
| MYO6     | NM_004999    | myosin VI                                                     | 0 | 0 | 0 | 0 | 1 | 0 | 0 | 1 | hsa-miR-647 | -0.04 | N/A | Sites in UTR |
| CD96     | NM_005816    | CD96 molecule                                                 | 0 | 0 | 0 | 0 | 1 | 0 | 0 | 1 | hsa-miR-647 | -0.04 | N/A | Sites in UTR |
| MCTS1    | NM_001137554 | malignant T cell amplified sequence 1                         | 0 | 0 | 0 | 0 | 1 | 0 | 0 | 1 | hsa-miR-647 | -0.04 | N/A | Sites in UTR |
| ANAPC16  | NM_001242546 | anaphase promoting complex subunit 16                         | 0 | 0 | 0 | 0 | 1 | 0 | 0 | 1 | hsa-miR-647 | -0.04 | N/A | Sites in UTR |
| ZNF704   | NM_001033723 | zinc finger protein 704                                       | 0 | 0 | 0 | 0 | 1 | 0 | 0 | 1 | hsa-miR-647 | -0.04 | N/A | Sites in UTR |
| SREK1IP1 | NM_173829    | SREK1-interacting protein 1                                   | 0 | 0 | 0 | 0 | 1 | 0 | 1 | 0 | hsa-miR-647 | -0.04 | N/A | Sites in UTR |
| ARPP19   | NM_006628    | cAMP-regulated phosphoprotein, 19kDa                          | 0 | 0 | 0 | 0 | 1 | 0 | 0 | 1 | hsa-miR-647 | -0.04 | N/A | Sites in UTR |
| XKR5     | NM_207411    | XK, Kell blood group complex subunit-related family, member 5 | 0 | 0 | 0 | 0 | 1 | 0 | 0 | 1 | hsa-miR-647 | -0.04 | N/A | Sites in UTR |
| C7orf65  | NM_001123065 | chromosome 7 open reading frame 65                            | 0 | 0 | 0 | 0 | 2 | 0 | 1 | 1 | hsa-miR-647 | -0.04 | N/A | Sites in UTR |

|         |              |                                                              |   |   |   |   |   |   |   |   |             |       |     |              |
|---------|--------------|--------------------------------------------------------------|---|---|---|---|---|---|---|---|-------------|-------|-----|--------------|
| RIMS3   | NM_014747    | regulating synaptic membrane exocytosis 3                    | 0 | 0 | 0 | 0 | 1 | 0 | 1 | 0 | hsa-miR-647 | -0.04 | N/A | Sites in UTR |
| NT5DC3  | NM_001031701 | 5'-nucleotidase domain containing 3                          | 0 | 0 | 0 | 0 | 1 | 0 | 1 | 0 | hsa-miR-647 | -0.04 | N/A | Sites in UTR |
| KLHL21  | NM_014851    | kelch-like 21 (Drosophila)                                   | 0 | 0 | 0 | 0 | 1 | 0 | 0 | 1 | hsa-miR-647 | -0.04 | N/A | Sites in UTR |
| ABCB8   | NM_007188    | ATP-binding cassette, sub-family B (MDR/TAP), member 8       | 0 | 0 | 0 | 0 | 1 | 0 | 0 | 1 | hsa-miR-647 | -0.04 | N/A | Sites in UTR |
| RAB22A  | NM_020673    | RAB22A, member RAS oncogene family                           | 0 | 0 | 0 | 0 | 1 | 0 | 0 | 1 | hsa-miR-647 | -0.04 | N/A | Sites in UTR |
| KCTD16  | NM_020768    | potassium channel tetramerisation domain containing 16       | 0 | 0 | 0 | 0 | 1 | 0 | 0 | 1 | hsa-miR-647 | -0.04 | N/A | Sites in UTR |
| C1QTNF8 | NM_207419    | C1q and tumor necrosis factor related protein 8              | 0 | 0 | 0 | 0 | 2 | 0 | 1 | 1 | hsa-miR-647 | -0.04 | N/A | Sites in UTR |
| EDA     | NM_001005609 | ectodysplasin A                                              | 0 | 0 | 0 | 0 | 2 | 0 | 0 | 2 | hsa-miR-647 | -0.04 | N/A | Sites in UTR |
| CD93    | NM_012072    | CD93 molecule                                                | 0 | 0 | 0 | 0 | 1 | 0 | 1 | 0 | hsa-miR-647 | -0.04 | N/A | Sites in UTR |
| ST8SIA3 | NM_015879    | ST8 alpha-N-acetyl-neuraminide alpha-2,8-sialyltransferase 3 | 0 | 0 | 0 | 0 | 2 | 0 | 0 | 2 | hsa-miR-647 | -0.04 | N/A | Sites in UTR |
| CELF5   | NM_001172673 | CUGBP, Elav-like family member 5                             | 0 | 0 | 0 | 0 | 1 | 0 | 1 | 0 | hsa-miR-647 | -0.04 | N/A | Sites in UTR |
| ZNF587  | NM_001204817 | zinc finger protein 587                                      | 0 | 0 | 0 | 0 | 1 | 0 | 1 | 0 | hsa-miR-647 | -0.04 | N/A | Sites in UTR |
| MUM1    | NM_032853    | melanoma associated antigen (mutated) 1                      | 0 | 0 | 0 | 0 | 1 | 0 | 1 | 0 | hsa-miR-647 | -0.04 | N/A | Sites in UTR |
| TSPYL5  | NM_033512    | TSPY-like 5                                                  | 0 | 0 | 0 | 0 | 1 | 0 | 1 | 0 | hsa-miR-647 | -0.04 | N/A | Sites in UTR |
| ADCY2   | NM_020546    | adenylate cyclase 2 (brain)                                  | 0 | 0 | 0 | 0 | 1 | 0 | 0 | 1 | hsa-miR-647 | -0.04 | N/A | Sites in UTR |
| LAMTOR3 | NM_021970    | late endosomal/lysosomal adaptor, MAPK and MTOR activator 3  | 0 | 0 | 0 | 0 | 1 | 0 | 0 | 1 | hsa-miR-647 | -0.04 | N/A | Sites in UTR |
| ISLR2   | NM_001130136 | immunoglobulin superfamily containing leucine-rich repeat 2  | 0 | 0 | 0 | 0 | 1 | 0 | 0 | 1 | hsa-miR-647 | -0.04 | N/A | Sites in UTR |
| COL5A1  | NM_000093    | collagen, type V, alpha 1                                    | 0 | 0 | 0 | 0 | 1 | 0 | 1 | 0 | hsa-miR-647 | -0.04 | N/A | Sites in UTR |

|        |              |                                                                                 |   |   |   |   |   |   |   |   |             |       |     |              |
|--------|--------------|---------------------------------------------------------------------------------|---|---|---|---|---|---|---|---|-------------|-------|-----|--------------|
| POM121 | NM_172020    | POM121 membrane glycoprotein                                                    | 0 | 0 | 0 | 0 | 1 | 0 | 1 | 0 | hsa-miR-647 | -0.04 | N/A | Sites in UTR |
| KDM2A  | NM_012308    | lysine (K)-specific demethylase 2A                                              | 0 | 0 | 0 | 0 | 1 | 0 | 1 | 0 | hsa-miR-647 | -0.04 | N/A | Sites in UTR |
| PRRC2B | NM_013318    | proline-rich coiled-coil 2B                                                     | 0 | 0 | 0 | 0 | 1 | 0 | 1 | 0 | hsa-miR-647 | -0.04 | N/A | Sites in UTR |
| PDE10A | NM_001130690 | phosphodiesterase 10A                                                           | 0 | 0 | 0 | 0 | 1 | 0 | 0 | 1 | hsa-miR-647 | -0.04 | N/A | Sites in UTR |
| CCDC69 | NM_015621    | coiled-coil domain containing 69                                                | 0 | 0 | 0 | 0 | 1 | 0 | 0 | 1 | hsa-miR-647 | -0.04 | N/A | Sites in UTR |
| SPCS3  | NM_021928    | signal peptidase complex subunit 3 homolog ( <i>S. cerevisiae</i> )             | 0 | 0 | 0 | 0 | 1 | 0 | 0 | 1 | hsa-miR-647 | -0.04 | N/A | Sites in UTR |
| DCAF10 | NM_024345    | DDB1 and CUL4 associated factor 10                                              | 0 | 0 | 0 | 0 | 1 | 0 | 0 | 1 | hsa-miR-647 | -0.04 | N/A | Sites in UTR |
| RUNX1  | NM_001001890 | runt-related transcription factor 1                                             | 0 | 0 | 0 | 0 | 1 | 0 | 0 | 1 | hsa-miR-647 | -0.04 | N/A | Sites in UTR |
| MBD2   | NM_003927    | methyl-CpG binding domain protein 2                                             | 0 | 0 | 0 | 0 | 1 | 0 | 0 | 1 | hsa-miR-647 | -0.04 | N/A | Sites in UTR |
| ZNF562 | NM_001130031 | zinc finger protein 562                                                         | 0 | 0 | 0 | 0 | 1 | 0 | 0 | 1 | hsa-miR-647 | -0.04 | N/A | Sites in UTR |
| GIPC3  | NM_133261    | GIPC PDZ domain containing family, member 3                                     | 0 | 0 | 0 | 0 | 2 | 0 | 1 | 1 | hsa-miR-647 | -0.04 | N/A | Sites in UTR |
| KCNC1  | NM_004976    | potassium voltage-gated channel, Shaw-related subfamily, member 1               | 0 | 0 | 0 | 0 | 1 | 0 | 1 | 0 | hsa-miR-647 | -0.04 | N/A | Sites in UTR |
| RORA   | NM_002943    | RAR-related orphan receptor A                                                   | 1 | 0 | 1 | 0 | 0 | 0 | 0 | 0 | hsa-miR-647 | -0.04 | N/A | Sites in UTR |
| NTN1   | NM_004822    | netrin 1                                                                        | 0 | 0 | 0 | 0 | 1 | 0 | 1 | 0 | hsa-miR-647 | -0.04 | N/A | Sites in UTR |
| CLASP1 | NM_001142273 | cytoplasmic linker associated protein 1                                         | 0 | 0 | 0 | 0 | 1 | 0 | 1 | 0 | hsa-miR-647 | -0.04 | N/A | Sites in UTR |
| SYS1   | NM_001197129 | SYS1 Golgi-localized integral membrane protein homolog ( <i>S. cerevisiae</i> ) | 0 | 0 | 0 | 0 | 1 | 0 | 1 | 0 | hsa-miR-647 | -0.04 | N/A | Sites in UTR |
| SPOCK1 | NM_004598    | sparc/osteonectin, cwcv and kazal-like domains proteoglycan (testican) 1        | 0 | 0 | 0 | 0 | 1 | 0 | 0 | 1 | hsa-miR-647 | -0.04 | N/A | Sites in UTR |
| FBXL16 | NM_153350    | F-box and leucine-rich repeat protein 16                                        | 0 | 0 | 0 | 0 | 1 | 0 | 0 | 1 | hsa-miR-647 | -0.04 | N/A | Sites in UTR |

|          |              |                                                                                                          |   |   |   |   |   |   |   |   |   |             |       |     |              |
|----------|--------------|----------------------------------------------------------------------------------------------------------|---|---|---|---|---|---|---|---|---|-------------|-------|-----|--------------|
| APBB2    | NM_001166050 | amyloid beta (A4) precursor protein-binding, family B, member 2                                          | 1 | 0 | 1 | 0 | 0 | 0 | 0 | 0 | 0 | hsa-miR-647 | -0.04 | N/A | Sites in UTR |
| EPAS1    | NM_001430    | endothelial PAS domain protein 1                                                                         | 0 | 0 | 0 | 0 | 1 | 0 | 1 | 0 | 0 | hsa-miR-647 | -0.04 | N/A | Sites in UTR |
| SYT7     | NM_004200    | synaptotagmin VII                                                                                        | 0 | 0 | 0 | 0 | 1 | 0 | 1 | 0 | 0 | hsa-miR-647 | -0.04 | N/A | Sites in UTR |
| CNTNAP2  | NM_014141    | contactin associated protein-like 2                                                                      | 0 | 0 | 0 | 0 | 1 | 0 | 0 | 1 | 0 | hsa-miR-647 | -0.04 | N/A | Sites in UTR |
| COMMD2   | NM_016094    | COMM domain containing 2                                                                                 | 0 | 0 | 0 | 0 | 1 | 0 | 0 | 1 | 0 | hsa-miR-647 | -0.04 | N/A | Sites in UTR |
| CBX7     | NM_175709    | chromobox homolog 7                                                                                      | 0 | 0 | 0 | 0 | 2 | 0 | 1 | 1 | 0 | hsa-miR-647 | -0.04 | N/A | Sites in UTR |
| FLT1     | NM_002019    | fms-related tyrosine kinase 1 (vascular endothelial growth factor/vascular permeability factor receptor) | 0 | 0 | 0 | 0 | 1 | 0 | 1 | 0 | 0 | hsa-miR-647 | -0.04 | N/A | Sites in UTR |
| GRK6     | NM_001004106 | G protein-coupled receptor kinase 6                                                                      | 0 | 0 | 0 | 0 | 1 | 0 | 1 | 0 | 0 | hsa-miR-647 | -0.04 | N/A | Sites in UTR |
| SETD1B   | NM_015048    | SET domain containing 1B                                                                                 | 0 | 0 | 0 | 0 | 1 | 0 | 1 | 0 | 0 | hsa-miR-647 | -0.04 | N/A | Sites in UTR |
| SLC7A8   | NM_012244    | solute carrier family 7 (amino acid transporter light chain, L system), member 8                         | 0 | 0 | 0 | 0 | 1 | 0 | 1 | 0 | 0 | hsa-miR-647 | -0.04 | N/A | Sites in UTR |
| XRRA1    | NM_182969    | X-ray radiation resistance associated 1                                                                  | 0 | 0 | 0 | 0 | 1 | 0 | 1 | 0 | 0 | hsa-miR-647 | -0.04 | N/A | Sites in UTR |
| BDNF     | NM_001143805 | brain-derived neurotrophic factor                                                                        | 0 | 0 | 0 | 0 | 1 | 0 | 0 | 1 | 0 | hsa-miR-647 | -0.04 | N/A | Sites in UTR |
| RALGAPB  | NM_020336    | Ral GTPase activating protein, beta subunit (non-catalytic)                                              | 0 | 0 | 0 | 0 | 1 | 0 | 0 | 1 | 0 | hsa-miR-647 | -0.04 | N/A | Sites in UTR |
| SPN      | NM_001030288 | sialophorin                                                                                              | 0 | 0 | 0 | 0 | 1 | 0 | 1 | 0 | 0 | hsa-miR-647 | -0.04 | N/A | Sites in UTR |
| PPIE     | NM_006112    | peptidylprolyl isomerase E (cyclophilin E)                                                               | 0 | 0 | 0 | 0 | 1 | 0 | 1 | 0 | 0 | hsa-miR-647 | -0.04 | N/A | Sites in UTR |
| FAM189A1 | NM_015307    | family with sequence similarity 189, member A1                                                           | 0 | 0 | 0 | 0 | 1 | 0 | 1 | 0 | 0 | hsa-miR-647 | -0.04 | N/A | Sites in UTR |
| RPH3A    | NM_001143854 | rabphilin 3A homolog (mouse)                                                                             | 0 | 0 | 0 | 0 | 1 | 0 | 0 | 1 | 0 | hsa-miR-647 | -0.04 | N/A | Sites in UTR |
| EMR2     | NM_013447    | egf-like module containing, mucin-like, hormone receptor-like 2                                          | 0 | 0 | 0 | 0 | 1 | 0 | 0 | 1 | 0 | hsa-miR-647 | -0.04 | N/A | Sites in UTR |

|          |              |                                                                        |   |   |   |   |   |   |   |   |             |       |     |              |
|----------|--------------|------------------------------------------------------------------------|---|---|---|---|---|---|---|---|-------------|-------|-----|--------------|
| YPEL1    | NM_013313    | yippee-like 1 (Drosophila)                                             | 0 | 0 | 0 | 0 | 2 | 0 | 1 | 1 | hsa-miR-647 | -0.03 | N/A | Sites in UTR |
| C9orf140 | NM_178448    | chromosome 9 open reading frame 140                                    | 0 | 0 | 0 | 0 | 2 | 0 | 1 | 1 | hsa-miR-647 | -0.03 | N/A | Sites in UTR |
| PCGF5    | NM_032373    | polycomb group ring finger 5                                           | 0 | 0 | 0 | 0 | 2 | 0 | 0 | 2 | hsa-miR-647 | -0.03 | N/A | Sites in UTR |
| CD59     | NM_000611    | CD59 molecule, complement regulatory protein                           | 0 | 0 | 0 | 0 | 1 | 0 | 1 | 0 | hsa-miR-647 | -0.03 | N/A | Sites in UTR |
| FANCC    | NM_000136    | Fanconi anemia, complementation group C                                | 0 | 0 | 0 | 0 | 1 | 0 | 1 | 0 | hsa-miR-647 | -0.03 | N/A | Sites in UTR |
| NEDD4L   | NM_001144964 | neural precursor cell expressed, developmentally down-regulated 4-like | 0 | 0 | 0 | 0 | 1 | 0 | 1 | 0 | hsa-miR-647 | -0.03 | N/A | Sites in UTR |
| CRLS1    | NM_001127458 | cardiolipin synthase 1                                                 | 0 | 0 | 0 | 0 | 1 | 0 | 1 | 0 | hsa-miR-647 | -0.03 | N/A | Sites in UTR |
| PTGIS    | NM_000961    | prostaglandin I2 (prostacyclin) synthase                               | 0 | 0 | 0 | 0 | 1 | 0 | 0 | 1 | hsa-miR-647 | -0.03 | N/A | Sites in UTR |
| RND2     | NM_005440    | Rho family GTPase 2                                                    | 0 | 0 | 0 | 0 | 1 | 0 | 0 | 1 | hsa-miR-647 | -0.03 | N/A | Sites in UTR |
| CA5B     | NM_007220    | carbonic anhydrase VB, mitochondrial                                   | 0 | 0 | 0 | 0 | 1 | 0 | 0 | 1 | hsa-miR-647 | -0.03 | N/A | Sites in UTR |
| KLHDC5   | NM_020782    | kelch domain containing 5                                              | 0 | 0 | 0 | 0 | 1 | 0 | 0 | 1 | hsa-miR-647 | -0.03 | N/A | Sites in UTR |
| BACH2    | NM_001170794 | BTB and CNC homology 1, basic leucine zipper transcription factor 2    | 0 | 0 | 0 | 0 | 1 | 0 | 1 | 0 | hsa-miR-647 | -0.03 | N/A | Sites in UTR |
| MED29    | NM_017592    | mediator complex subunit 29                                            | 0 | 0 | 0 | 0 | 1 | 0 | 0 | 1 | hsa-miR-647 | -0.03 | N/A | Sites in UTR |
| TAOK1    | NM_020791    | TAO kinase 1                                                           | 0 | 0 | 0 | 0 | 1 | 0 | 0 | 1 | hsa-miR-647 | -0.03 | N/A | Sites in UTR |
| CHURC1   | NM_001204063 | churchill domain containing 1                                          | 0 | 0 | 0 | 0 | 1 | 0 | 0 | 1 | hsa-miR-647 | -0.03 | N/A | Sites in UTR |
| GDF11    | NM_005811    | growth differentiation factor 11                                       | 2 | 0 | 0 | 2 | 0 | 0 | 0 | 0 | hsa-miR-647 | -0.03 | N/A | Sites in UTR |
| GABRG1   | NM_173536    | gamma-aminobutyric acid (GABA) A receptor, gamma 1                     | 0 | 0 | 0 | 0 | 1 | 0 | 0 | 1 | hsa-miR-647 | -0.03 | N/A | Sites in UTR |
| MAF      | NM_001031804 | v-maf musculoaponeurotic fibrosarcoma oncogene homolog (avian)         | 0 | 0 | 0 | 0 | 1 | 0 | 0 | 1 | hsa-miR-647 | -0.03 | N/A | Sites in UTR |

|          |              |                                                                                           |   |   |   |   |   |   |   |   |             |       |     |              |
|----------|--------------|-------------------------------------------------------------------------------------------|---|---|---|---|---|---|---|---|-------------|-------|-----|--------------|
| MTUS2    | NM_001033602 | microtubule associated tumor suppressor candidate 2                                       | 0 | 0 | 0 | 0 | 1 | 0 | 0 | 1 | hsa-miR-647 | -0.03 | N/A | Sites in UTR |
| RPRD1A   | NM_018170    | regulation of nuclear pre-mRNA domain containing 1A                                       | 0 | 0 | 0 | 0 | 2 | 0 | 1 | 1 | hsa-miR-647 | -0.03 | N/A | Sites in UTR |
| PPARA    | NM_001001928 | peroxisome proliferator-activated receptor alpha                                          | 0 | 0 | 0 | 0 | 2 | 0 | 0 | 2 | hsa-miR-647 | -0.03 | N/A | Sites in UTR |
| PACS2    | NM_001100913 | phosphofurin acidic cluster sorting protein 2                                             | 0 | 0 | 0 | 0 | 1 | 0 | 1 | 0 | hsa-miR-647 | -0.03 | N/A | Sites in UTR |
| MKNK2    | NM_199054    | MAP kinase interacting serine/threonine kinase 2                                          | 0 | 0 | 0 | 0 | 1 | 0 | 0 | 1 | hsa-miR-647 | -0.03 | N/A | Sites in UTR |
| LIN7C    | NM_018362    | lin-7 homolog C (C. elegans)                                                              | 1 | 0 | 0 | 1 | 0 | 0 | 0 | 0 | hsa-miR-647 | -0.03 | N/A | Sites in UTR |
| C1GALT1  | NM_020156    | core 1 synthase, glycoprotein-N-acetylgalactosamine 3-beta-galactosyltransferase, 1       | 0 | 0 | 0 | 0 | 1 | 0 | 0 | 1 | hsa-miR-647 | -0.03 | N/A | Sites in UTR |
| KLHL6    | NM_130446    | kelch-like 6 (Drosophila)                                                                 | 0 | 0 | 0 | 0 | 1 | 0 | 0 | 1 | hsa-miR-647 | -0.03 | N/A | Sites in UTR |
| SNX27    | NM_030918    | sorting nexin family member 27                                                            | 0 | 0 | 0 | 0 | 1 | 0 | 1 | 0 | hsa-miR-647 | -0.03 | N/A | Sites in UTR |
| SCRT1    | NM_031309    | scratch homolog 1, zinc finger protein (Drosophila)                                       | 0 | 0 | 0 | 0 | 1 | 0 | 1 | 0 | hsa-miR-647 | -0.03 | N/A | Sites in UTR |
| NANOS1   | NM_199461    | nanos homolog 1 (Drosophila)                                                              | 0 | 0 | 0 | 0 | 1 | 0 | 1 | 0 | hsa-miR-647 | -0.03 | N/A | Sites in UTR |
| RSPO4    | NM_001029871 | R-spondin 4                                                                               | 0 | 0 | 0 | 0 | 1 | 0 | 1 | 0 | hsa-miR-647 | -0.03 | N/A | Sites in UTR |
| ISPD     | NM_001101417 | isoprenoid synthase domain containing                                                     | 0 | 0 | 0 | 0 | 1 | 0 | 0 | 1 | hsa-miR-647 | -0.03 | N/A | Sites in UTR |
| ARHGAP31 | NM_020754    | Rho GTPase activating protein 31                                                          | 0 | 0 | 0 | 0 | 1 | 0 | 0 | 1 | hsa-miR-647 | -0.03 | N/A | Sites in UTR |
| YWHAG    | NM_012479    | tyrosine 3-monooxygenase/tryptophan 5-monooxygenase activation protein, gamma polypeptide | 0 | 0 | 0 | 0 | 1 | 0 | 1 | 0 | hsa-miR-647 | -0.03 | N/A | Sites in UTR |
| HEG1     | NM_020733    | HEG homolog 1 (zebrafish)                                                                 | 0 | 0 | 0 | 0 | 1 | 0 | 1 | 0 | hsa-miR-647 | -0.03 | N/A | Sites in UTR |
| CCDC117  | NM_173510    | coiled-coil domain containing 117                                                         | 0 | 0 | 0 | 0 | 1 | 0 | 1 | 0 | hsa-miR-647 | -0.03 | N/A | Sites in UTR |
| SLC6A17  | NM_001010898 | solute carrier family 6, member 17                                                        | 0 | 0 | 0 | 0 | 1 | 0 | 1 | 0 | hsa-miR-647 | -0.03 | N/A | Sites in UTR |

|         |              |                                                               |   |   |   |   |   |   |   |   |             |       |     |              |
|---------|--------------|---------------------------------------------------------------|---|---|---|---|---|---|---|---|-------------|-------|-----|--------------|
| CXADR   | NM_001207063 | cox sackie virus and adenovirus receptor                      | 0 | 0 | 0 | 0 | 1 | 0 | 0 | 1 | hsa-miR-647 | -0.03 | N/A | Sites in UTR |
| NOL12   | NM_024313    | nucleolar protein 12                                          | 0 | 0 | 0 | 0 | 1 | 0 | 0 | 1 | hsa-miR-647 | -0.03 | N/A | Sites in UTR |
| CRX     | NM_000554    | cone-rod homeobox                                             | 0 | 0 | 0 | 0 | 1 | 0 | 1 | 0 | hsa-miR-647 | -0.03 | N/A | Sites in UTR |
| LGALS8  | NM_006499    | lectin, galactoside-binding, soluble, 8                       | 0 | 0 | 0 | 0 | 1 | 0 | 1 | 0 | hsa-miR-647 | -0.03 | N/A | Sites in UTR |
| C9orf69 | NM_152833    | chromosome 9 open reading frame 69                            | 0 | 0 | 0 | 0 | 1 | 0 | 0 | 1 | hsa-miR-647 | -0.03 | N/A | Sites in UTR |
| CASP2   | NM_001224    | caspase 2, apoptosis-related cysteine peptidase               | 0 | 0 | 0 | 0 | 1 | 0 | 0 | 1 | hsa-miR-647 | -0.03 | N/A | Sites in UTR |
| LYRM2   | NM_020466    | LYR motif containing 2                                        | 0 | 0 | 0 | 0 | 1 | 0 | 0 | 1 | hsa-miR-647 | -0.03 | N/A | Sites in UTR |
| FASN    | NM_004104    | fatty acid synthase                                           | 0 | 0 | 0 | 0 | 1 | 0 | 1 | 0 | hsa-miR-647 | -0.03 | N/A | Sites in UTR |
| PAX5    | NM_016734    | paired box 5                                                  | 0 | 0 | 0 | 0 | 1 | 0 | 0 | 1 | hsa-miR-647 | -0.03 | N/A | Sites in UTR |
| TMCC1   | NM_001017395 | transmembrane and coiled-coil domain family 1                 | 0 | 0 | 0 | 0 | 1 | 0 | 0 | 1 | hsa-miR-647 | -0.03 | N/A | Sites in UTR |
| UBE2D4  | NM_015983    | ubiquitin-conjugating enzyme E2D 4 (putative)                 | 0 | 0 | 0 | 0 | 2 | 0 | 0 | 2 | hsa-miR-647 | -0.02 | N/A | Sites in UTR |
| SGCD    | NM_000337    | sarcoglycan, delta (35kDa dystrophin-associated glycoprotein) | 0 | 0 | 0 | 0 | 1 | 0 | 1 | 0 | hsa-miR-647 | -0.02 | N/A | Sites in UTR |
| SNX9    | NM_016224    | sorting nexin 9                                               | 0 | 0 | 0 | 0 | 1 | 0 | 1 | 0 | hsa-miR-647 | -0.02 | N/A | Sites in UTR |
| DTX3L   | NM_138287    | deltex 3-like (Drosophila)                                    | 0 | 0 | 0 | 0 | 1 | 0 | 1 | 0 | hsa-miR-647 | -0.02 | N/A | Sites in UTR |
| ARRB1   | NM_004041    | arrestin, beta 1                                              | 0 | 0 | 0 | 0 | 1 | 0 | 0 | 1 | hsa-miR-647 | -0.02 | N/A | Sites in UTR |
| GFPT1   | NM_002056    | glutamine--fructose-6-phosphate transaminase 1                | 0 | 0 | 0 | 0 | 1 | 0 | 0 | 1 | hsa-miR-647 | -0.02 | N/A | Sites in UTR |
| STX11   | NM_003764    | syntaxin 11                                                   | 0 | 0 | 0 | 0 | 1 | 0 | 0 | 1 | hsa-miR-647 | -0.02 | N/A | Sites in UTR |
| ICMT    | NM_012405    | isoprenylcysteine carboxyl methyltransferase                  | 0 | 0 | 0 | 0 | 1 | 0 | 0 | 1 | hsa-miR-647 | -0.02 | N/A | Sites in UTR |



|           |              |                                                                            |   |   |   |   |   |   |   |   |             |       |     |              |
|-----------|--------------|----------------------------------------------------------------------------|---|---|---|---|---|---|---|---|-------------|-------|-----|--------------|
| UHRF1BP1  | NM_017754    | UHRF1 binding protein 1                                                    | 0 | 0 | 0 | 0 | 1 | 0 | 0 | 1 | hsa-miR-647 | -0.02 | N/A | Sites in UTR |
| IFFO2     | NM_001136265 | intermediate filament family orphan 2                                      | 0 | 0 | 0 | 0 | 1 | 0 | 0 | 1 | hsa-miR-647 | -0.02 | N/A | Sites in UTR |
| VIPR2     | NM_003382    | vasoactive intestinal peptide receptor 2                                   | 0 | 0 | 0 | 0 | 1 | 0 | 1 | 0 | hsa-miR-647 | -0.02 | N/A | Sites in UTR |
| PTAR1     | NM_001099666 | protein prenyltransferase alpha subunit repeat containing 1                | 0 | 0 | 0 | 0 | 1 | 0 | 0 | 1 | hsa-miR-647 | -0.02 | N/A | Sites in UTR |
| NFIB      | NM_001190737 | nuclear factor I/B                                                         | 1 | 0 | 0 | 1 | 1 | 0 | 0 | 1 | hsa-miR-647 | -0.02 | N/A | Sites in UTR |
| AGFG2     | NM_006076    | ArfGAP with FG repeats 2                                                   | 0 | 0 | 0 | 0 | 1 | 0 | 1 | 0 | hsa-miR-647 | -0.02 | N/A | Sites in UTR |
| C6orf168  | NM_032511    | chromosome 6 open reading frame 168                                        | 0 | 0 | 0 | 0 | 1 | 0 | 1 | 0 | hsa-miR-647 | -0.02 | N/A | Sites in UTR |
| IL13RA1   | NM_001560    | interleukin 13 receptor, alpha 1                                           | 0 | 0 | 0 | 0 | 1 | 0 | 0 | 1 | hsa-miR-647 | -0.02 | N/A | Sites in UTR |
| C1orf52   | NM_198077    | chromosome 1 open reading frame 52                                         | 0 | 0 | 0 | 0 | 1 | 0 | 0 | 1 | hsa-miR-647 | -0.02 | N/A | Sites in UTR |
| RC3H1     | NM_172071    | ring finger and CCCH-type domains 1                                        | 0 | 0 | 0 | 0 | 1 | 0 | 0 | 1 | hsa-miR-647 | -0.02 | N/A | Sites in UTR |
| SLC15A2   | NM_001145998 | solute carrier family 15 (H+/peptide transporter), member 2                | 0 | 0 | 0 | 0 | 1 | 0 | 1 | 0 | hsa-miR-647 | -0.02 | N/A | Sites in UTR |
| VDR       | NM_000376    | vitamin D (1,25- dihydroxyvitamin D3) receptor                             | 0 | 0 | 0 | 0 | 1 | 0 | 1 | 0 | hsa-miR-647 | -0.02 | N/A | Sites in UTR |
| CEP104    | NM_014704    | centrosomal protein 104kDa                                                 | 0 | 0 | 0 | 0 | 1 | 0 | 1 | 0 | hsa-miR-647 | -0.02 | N/A | Sites in UTR |
| DGCR2     | NM_001173533 | DiGeorge syndrome critical region gene 2                                   | 0 | 0 | 0 | 0 | 1 | 0 | 1 | 0 | hsa-miR-647 | -0.02 | N/A | Sites in UTR |
| C10orf105 | NM_001164375 | chromosome 10 open reading frame 105                                       | 1 | 0 | 1 | 0 | 0 | 0 | 0 | 0 | hsa-miR-647 | -0.02 | N/A | Sites in UTR |
| TTPAL     | NM_001039199 | tocopherol (alpha) transfer protein-like                                   | 0 | 0 | 0 | 0 | 1 | 0 | 0 | 1 | hsa-miR-647 | -0.02 | N/A | Sites in UTR |
| RUNX1T1   | NM_001198625 | runt-related transcription factor 1; translocated to, 1 (cyclin D-related) | 1 | 0 | 0 | 1 | 0 | 0 | 0 | 0 | hsa-miR-647 | -0.02 | N/A | Sites in UTR |
| ERG       | NM_001136154 | v-ets erythroblastosis virus E26 oncogene homolog (avian)                  | 0 | 0 | 0 | 0 | 1 | 0 | 0 | 1 | hsa-miR-647 | -0.02 | N/A | Sites in UTR |

|              |              |                                                                            |   |   |   |   |   |   |   |   |             |         |     |              |
|--------------|--------------|----------------------------------------------------------------------------|---|---|---|---|---|---|---|---|-------------|---------|-----|--------------|
| PAPPA        | NM_002581    | pregnancy-associated plasma protein A, pappalysin 1                        | 0 | 0 | 0 | 0 | 1 | 0 | 0 | 1 | hsa-miR-647 | -0.02   | N/A | Sites in UTR |
| SPRY4        | NM_001127496 | sprouty homolog 4 (Drosophila)                                             | 1 | 0 | 0 | 1 | 0 | 0 | 0 | 0 | hsa-miR-647 | -0.02   | N/A | Sites in UTR |
| EHD1         | NM_006795    | EH-domain containing 1                                                     | 0 | 0 | 0 | 0 | 1 | 0 | 0 | 1 | hsa-miR-647 | -0.02   | N/A | Sites in UTR |
| MICAL3       | NM_001136004 | microtubule associated monooxygenase, calponin and LIM domain containing 3 | 0 | 0 | 0 | 0 | 1 | 0 | 0 | 1 | hsa-miR-647 | -0.02   | N/A | Sites in UTR |
| CREBZF       | NM_001039618 | CREB/ATF bZIP transcription factor                                         | 0 | 0 | 0 | 0 | 1 | 0 | 0 | 1 | hsa-miR-647 | -0.02   | N/A | Sites in UTR |
| EPT1         | NM_033505    | ethanolaminephosphotransferase 1 (CDP-ethanolamine-specific)               | 0 | 0 | 0 | 0 | 1 | 0 | 0 | 1 | hsa-miR-647 | -0.02   | N/A | Sites in UTR |
| CHML         | NM_001821    | choroideremia-like (Rab escort protein 2)                                  | 0 | 0 | 0 | 0 | 1 | 0 | 0 | 1 | hsa-miR-647 | -0.02   | N/A | Sites in UTR |
| LOC100130705 | NM_001195150 | hypothetical protein LOC100130705                                          | 0 | 0 | 0 | 0 | 1 | 0 | 0 | 1 | hsa-miR-647 | -0.02   | N/A | Sites in UTR |
| CENPN        | NM_001100624 | centromere protein N                                                       | 0 | 0 | 0 | 0 | 1 | 0 | 0 | 1 | hsa-miR-647 | -0.02   | N/A | Sites in UTR |
| AKNA         | NM_030767    | AT-hook transcription factor                                               | 0 | 0 | 0 | 0 | 1 | 0 | 0 | 1 | hsa-miR-647 | -0.01   | N/A | Sites in UTR |
| BMPR2        | NM_001204    | bone morphogenetic protein receptor, type II (serine/threonine kinase)     | 0 | 0 | 0 | 0 | 1 | 0 | 0 | 1 | hsa-miR-647 | -0.01   | N/A | Sites in UTR |
| PTPRD        | NM_001040712 | protein tyrosine phosphatase, receptor type, D                             | 0 | 0 | 0 | 0 | 1 | 0 | 0 | 1 | hsa-miR-647 | -0.01   | N/A | Sites in UTR |
| NMT1         | NM_021079    | N-myristoyltransferase 1                                                   | 0 | 0 | 0 | 0 | 1 | 0 | 0 | 1 | hsa-miR-647 | -0.01   | N/A | Sites in UTR |
| MAP3K13      | NM_001242314 | mitogen-activated protein kinase kinase kinase 13                          | 1 | 0 | 0 | 1 | 0 | 0 | 0 | 0 | hsa-miR-647 | -0.01   | N/A | Sites in UTR |
| C9orf91      | NM_153045    | chromosome 9 open reading frame 91                                         | 0 | 0 | 0 | 0 | 1 | 0 | 0 | 1 | hsa-miR-647 | -0.01   | N/A | Sites in UTR |
| B7H6         | NM_001202439 | B7 homolog 6                                                               | 0 | 0 | 0 | 0 | 1 | 0 | 0 | 1 | hsa-miR-647 | -0.01   | N/A | Sites in UTR |
| MDM4         | NM_001204171 | Mdm4 p53 binding protein homolog (mouse)                                   | 0 | 0 | 0 | 0 | 1 | 0 | 0 | 1 | hsa-miR-647 | > -0.01 | N/A | Sites in UTR |
| TP53INP2     | NM_021202    | tumor protein p53 inducible nuclear protein 2                              | 0 | 0 | 0 | 0 | 1 | 0 | 0 | 1 | hsa-miR-647 | > -0.01 | N/A | Sites in UTR |

|         |              |                                                                                    |   |   |   |   |   |   |   |   |             |         |     |              |
|---------|--------------|------------------------------------------------------------------------------------|---|---|---|---|---|---|---|---|-------------|---------|-----|--------------|
| KCNMA1  | NM_001014797 | potassium large conductance calcium-activated channel, subfamily M, alpha member 1 | 0 | 0 | 0 | 0 | 1 | 0 | 0 | 1 | hsa-miR-647 | > -0.01 | N/A | Sites in UTR |
| ABAT    | NM_000663    | 4-aminobutyrate aminotransferase                                                   | 0 | 0 | 0 | 0 | 1 | 0 | 0 | 1 | hsa-miR-647 | > -0.01 | N/A | Sites in UTR |
| ACOX1   | NM_001185039 | acyl-CoA oxidase 1, palmitoyl                                                      | 0 | 0 | 0 | 0 | 1 | 0 | 0 | 1 | hsa-miR-647 | > -0.01 | N/A | Sites in UTR |
| ACVR2B  | NM_001106    | activin A receptor, type IIB                                                       | 0 | 0 | 0 | 0 | 1 | 0 | 0 | 1 | hsa-miR-647 | > -0.01 | N/A | Sites in UTR |
| ASTN1   | NM_004319    | astrotactin 1                                                                      | 0 | 0 | 0 | 0 | 1 | 0 | 0 | 1 | hsa-miR-647 | > -0.01 | N/A | Sites in UTR |
| CACNA1E | NM_000721    | calcium channel, voltage-dependent, R type, alpha 1E subunit                       | 0 | 0 | 0 | 0 | 1 | 0 | 0 | 1 | hsa-miR-647 | > -0.01 | N/A | Sites in UTR |
| CLCN5   | NM_000084    | chloride channel 5                                                                 | 0 | 0 | 0 | 0 | 1 | 0 | 0 | 1 | hsa-miR-647 | > -0.01 | N/A | Sites in UTR |
| DSC3    | NM_001941    | desmocollin 3                                                                      | 0 | 0 | 0 | 0 | 1 | 0 | 0 | 1 | hsa-miR-647 | > -0.01 | N/A | Sites in UTR |
| NDST1   | NM_001543    | N-deacetylase/N-sulfotransferase (heparan glucosaminyl) 1                          | 0 | 0 | 0 | 0 | 1 | 0 | 0 | 1 | hsa-miR-647 | > -0.01 | N/A | Sites in UTR |
| IRS1    | NM_005544    | insulin receptor substrate 1                                                       | 0 | 0 | 0 | 0 | 1 | 0 | 0 | 1 | hsa-miR-647 | > -0.01 | N/A | Sites in UTR |
| ITGB8   | NM_002214    | integrin, beta 8                                                                   | 0 | 0 | 0 | 0 | 1 | 0 | 0 | 1 | hsa-miR-647 | > -0.01 | N/A | Sites in UTR |
| MAPK1   | NM_002745    | mitogen-activated protein kinase 1                                                 | 0 | 0 | 0 | 0 | 1 | 0 | 0 | 1 | hsa-miR-647 | > -0.01 | N/A | Sites in UTR |
| PSEN1   | NM_000021    | presenilin 1                                                                       | 0 | 0 | 0 | 0 | 1 | 0 | 0 | 1 | hsa-miR-647 | > -0.01 | N/A | Sites in UTR |
| RREB1   | NM_001003698 | ras responsive element binding protein 1                                           | 0 | 0 | 0 | 0 | 1 | 0 | 0 | 1 | hsa-miR-647 | > -0.01 | N/A | Sites in UTR |
| ATXN1   | NM_000332    | ataxin 1                                                                           | 0 | 0 | 0 | 0 | 1 | 0 | 0 | 1 | hsa-miR-647 | > -0.01 | N/A | Sites in UTR |
| SCD     | NM_005063    | stearoyl-CoA desaturase (delta-9-desaturase)                                       | 0 | 0 | 0 | 0 | 1 | 0 | 0 | 1 | hsa-miR-647 | > -0.01 | N/A | Sites in UTR |
| TPM3    | NM_152263    | tropomyosin 3                                                                      | 0 | 0 | 0 | 0 | 1 | 0 | 0 | 1 | hsa-miR-647 | > -0.01 | N/A | Sites in UTR |
| LRP8    | NM_001018054 | low density lipoprotein receptor-related protein 8, apolipoprotein e receptor      | 0 | 0 | 0 | 0 | 1 | 0 | 0 | 1 | hsa-miR-647 | > -0.01 | N/A | Sites in UTR |

|          |              |                                                                        |   |   |   |   |   |   |   |   |             |         |     |              |
|----------|--------------|------------------------------------------------------------------------|---|---|---|---|---|---|---|---|-------------|---------|-----|--------------|
| CDC14B   | NM_001077181 | CDC14 cell division cycle 14 homolog B ( <i>S. cerevisiae</i> )        | 0 | 0 | 0 | 0 | 1 | 0 | 0 | 1 | hsa-miR-647 | > -0.01 | N/A | Sites in UTR |
| BTRC     | NM_003939    | beta-transducin repeat containing                                      | 0 | 0 | 0 | 0 | 1 | 0 | 0 | 1 | hsa-miR-647 | > -0.01 | N/A | Sites in UTR |
| LIMD1    | NM_014240    | LIM domains containing 1                                               | 0 | 0 | 0 | 0 | 1 | 0 | 0 | 1 | hsa-miR-647 | > -0.01 | N/A | Sites in UTR |
| VAPA     | NM_003574    | VAMP (vesicle-associated membrane protein)-associated protein A, 33kDa | 0 | 0 | 0 | 0 | 1 | 0 | 0 | 1 | hsa-miR-647 | > -0.01 | N/A | Sites in UTR |
| RASA4    | NM_001079877 | RAS p21 protein activator 4                                            | 0 | 0 | 0 | 0 | 1 | 0 | 0 | 1 | hsa-miR-647 | > -0.01 | N/A | Sites in UTR |
| TLR6     | NM_006068    | toll-like receptor 6                                                   | 0 | 0 | 0 | 0 | 1 | 0 | 0 | 1 | hsa-miR-647 | > -0.01 | N/A | Sites in UTR |
| NFAT5    | NM_001113178 | nuclear factor of activated T-cells 5, tonicity-responsive             | 0 | 0 | 0 | 0 | 1 | 0 | 0 | 1 | hsa-miR-647 | > -0.01 | N/A | Sites in UTR |
| NUDT4    | NM_019094    | nudix (nucleoside diphosphate linked moiety X)-type motif 4            | 0 | 0 | 0 | 0 | 1 | 0 | 0 | 1 | hsa-miR-647 | > -0.01 | N/A | Sites in UTR |
| FNBP1    | NM_015033    | formin binding protein 1                                               | 0 | 0 | 0 | 0 | 1 | 0 | 0 | 1 | hsa-miR-647 | > -0.01 | N/A | Sites in UTR |
| FBXO28   | NM_001136115 | F-box protein 28                                                       | 0 | 0 | 0 | 0 | 1 | 0 | 0 | 1 | hsa-miR-647 | > -0.01 | N/A | Sites in UTR |
| TTC28    | NM_001145418 | tetratricopeptide repeat domain 28                                     | 0 | 0 | 0 | 0 | 1 | 0 | 0 | 1 | hsa-miR-647 | > -0.01 | N/A | Sites in UTR |
| NCS1     | NM_001128826 | neuronal calcium sensor 1                                              | 0 | 0 | 0 | 0 | 1 | 0 | 0 | 1 | hsa-miR-647 | > -0.01 | N/A | Sites in UTR |
| PPP1R16B | NM_001172735 | protein phosphatase 1, regulatory (inhibitor) subunit 16B              | 0 | 0 | 0 | 0 | 1 | 0 | 0 | 1 | hsa-miR-647 | > -0.01 | N/A | Sites in UTR |
| RSL1D1   | NM_015659    | ribosomal L1 domain containing 1                                       | 0 | 0 | 0 | 0 | 1 | 0 | 0 | 1 | hsa-miR-647 | > -0.01 | N/A | Sites in UTR |
| EEF2K    | NM_013302    | eukaryotic elongation factor-2 kinase                                  | 0 | 0 | 0 | 0 | 1 | 0 | 0 | 1 | hsa-miR-647 | > -0.01 | N/A | Sites in UTR |
| ANKFY1   | NM_016376    | ankyrin repeat and FYVE domain containing 1                            | 0 | 0 | 0 | 0 | 1 | 0 | 0 | 1 | hsa-miR-647 | > -0.01 | N/A | Sites in UTR |
| TRIM33   | NM_015906    | tripartite motif containing 33                                         | 0 | 0 | 0 | 0 | 1 | 0 | 0 | 1 | hsa-miR-647 | > -0.01 | N/A | Sites in UTR |
| HES2     | NM_019089    | hairy and enhancer of split 2 ( <i>Drosophila</i> )                    | 0 | 0 | 0 | 0 | 1 | 0 | 0 | 1 | hsa-miR-647 | > -0.01 | N/A | Sites in UTR |

|          |              |                                                                   |   |   |   |   |   |   |   |   |             |         |     |              |
|----------|--------------|-------------------------------------------------------------------|---|---|---|---|---|---|---|---|-------------|---------|-----|--------------|
| LGI2     | NM_018176    | leucine-rich repeat LGI family, member 2                          | 0 | 0 | 0 | 0 | 1 | 0 | 0 | 1 | hsa-miR-647 | > -0.01 | N/A | Sites in UTR |
| CYP20A1  | NM_177538    | cytochrome P450, family 20, subfamily A, polypeptide 1            | 0 | 0 | 0 | 0 | 1 | 0 | 0 | 1 | hsa-miR-647 | > -0.01 | N/A | Sites in UTR |
| TBC1D24  | NM_001199107 | TBC1 domain family, member 24                                     | 0 | 0 | 0 | 0 | 1 | 0 | 0 | 1 | hsa-miR-647 | > -0.01 | N/A | Sites in UTR |
| AHRR     | NM_001242412 | aryl-hydrocarbon receptor repressor                               | 0 | 0 | 0 | 0 | 1 | 0 | 0 | 1 | hsa-miR-647 | > -0.01 | N/A | Sites in UTR |
| PCDH19   | NM_001105243 | protocadherin 19                                                  | 0 | 0 | 0 | 0 | 1 | 0 | 0 | 1 | hsa-miR-647 | > -0.01 | N/A | Sites in UTR |
| TNRC6C   | NM_001142640 | trinucleotide repeat containing 6C                                | 0 | 0 | 0 | 0 | 1 | 0 | 0 | 1 | hsa-miR-647 | > -0.01 | N/A | Sites in UTR |
| ZMAT3    | NM_022470    | zinc finger, matrin-type 3                                        | 0 | 0 | 0 | 0 | 1 | 0 | 0 | 1 | hsa-miR-647 | > -0.01 | N/A | Sites in UTR |
| MRPS25   | NM_022497    | mitochondrial ribosomal protein S25                               | 0 | 0 | 0 | 0 | 1 | 0 | 0 | 1 | hsa-miR-647 | > -0.01 | N/A | Sites in UTR |
| RMND5A   | NM_022780    | required for meiotic nuclear division 5 homolog A (S. cerevisiae) | 0 | 0 | 0 | 0 | 1 | 0 | 0 | 1 | hsa-miR-647 | > -0.01 | N/A | Sites in UTR |
| METTL8   | NM_024770    | methyltransferase like 8                                          | 0 | 0 | 0 | 0 | 1 | 0 | 0 | 1 | hsa-miR-647 | > -0.01 | N/A | Sites in UTR |
| FAM49A   | NM_030797    | family with sequence similarity 49, member A                      | 0 | 0 | 0 | 0 | 1 | 0 | 0 | 1 | hsa-miR-647 | > -0.01 | N/A | Sites in UTR |
| DNAL1    | NM_001201366 | dynein, axonemal, light chain 1                                   | 0 | 0 | 0 | 0 | 1 | 0 | 0 | 1 | hsa-miR-647 | > -0.01 | N/A | Sites in UTR |
| CRISPLD2 | NM_031476    | cysteine-rich secretory protein LCCL domain containing 2          | 0 | 0 | 0 | 0 | 1 | 0 | 0 | 1 | hsa-miR-647 | > -0.01 | N/A | Sites in UTR |
| CBX2     | NM_005189    | chromobox homolog 2                                               | 0 | 0 | 0 | 0 | 1 | 0 | 0 | 1 | hsa-miR-647 | > -0.01 | N/A | Sites in UTR |
| CALML4   | NM_001031733 | calmodulin-like 4                                                 | 0 | 0 | 0 | 0 | 1 | 0 | 0 | 1 | hsa-miR-647 | > -0.01 | N/A | Sites in UTR |
| MEX3A    | NM_001093725 | mex-3 homolog A (C. elegans)                                      | 0 | 0 | 0 | 0 | 1 | 0 | 0 | 1 | hsa-miR-647 | > -0.01 | N/A | Sites in UTR |
| LRRC58   | NM_001099678 | leucine rich repeat containing 58                                 | 0 | 0 | 0 | 0 | 1 | 0 | 0 | 1 | hsa-miR-647 | > -0.01 | N/A | Sites in UTR |
| ZNF831   | NM_178457    | zinc finger protein 831                                           | 0 | 0 | 0 | 0 | 1 | 0 | 0 | 1 | hsa-miR-647 | > -0.01 | N/A | Sites in UTR |

|           |              |                                                                     |   |   |   |   |   |   |   |   |             |         |     |              |
|-----------|--------------|---------------------------------------------------------------------|---|---|---|---|---|---|---|---|-------------|---------|-----|--------------|
| NUDT16    | NM_001171905 | nudix (nucleoside diphosphate linked moiety X)-type motif 16        | 0 | 0 | 0 | 0 | 1 | 0 | 0 | 1 | hsa-miR-647 | > -0.01 | N/A | Sites in UTR |
| APOOL     | NM_198450    | apolipoprotein O-like                                               | 0 | 0 | 0 | 0 | 1 | 0 | 0 | 1 | hsa-miR-647 | > -0.01 | N/A | Sites in UTR |
| ZNF519    | NM_145287    | zinc finger protein 519                                             | 0 | 0 | 0 | 0 | 1 | 0 | 0 | 1 | hsa-miR-647 | > -0.01 | N/A | Sites in UTR |
| RASSF6    | NM_177532    | Ras association (RalGDS/AF-6) domain family member 6                | 0 | 0 | 0 | 0 | 1 | 0 | 0 | 1 | hsa-miR-647 | > -0.01 | N/A | Sites in UTR |
| OLFML2A   | NM_182487    | olfactomedin-like 2A                                                | 0 | 0 | 0 | 0 | 1 | 0 | 0 | 1 | hsa-miR-647 | > -0.01 | N/A | Sites in UTR |
| SPIN3     | NM_001010862 | spindlin family, member 3                                           | 0 | 0 | 0 | 0 | 1 | 0 | 0 | 1 | hsa-miR-647 | > -0.01 | N/A | Sites in UTR |
| FO XK1    | NM_001037165 | forkhead box K1                                                     | 0 | 0 | 0 | 0 | 1 | 0 | 0 | 1 | hsa-miR-647 | > -0.01 | N/A | Sites in UTR |
| C7orf41   | NM_152793    | chromosome 7 open reading frame 41                                  | 0 | 0 | 0 | 0 | 1 | 0 | 0 | 1 | hsa-miR-647 | > -0.01 | N/A | Sites in UTR |
| SIAH3     | NM_198849    | seven in absentia homolog 3 (Drosophila)                            | 0 | 0 | 0 | 0 | 1 | 0 | 0 | 1 | hsa-miR-647 | > -0.01 | N/A | Sites in UTR |
| EIF4E3    | NM_001134649 | eukaryotic translation initiation factor 4E family member 3         | 0 | 0 | 0 | 0 | 1 | 0 | 0 | 1 | hsa-miR-647 | > -0.01 | N/A | Sites in UTR |
| ATXN1L    | NM_001137675 | ataxin 1-like                                                       | 0 | 0 | 0 | 0 | 1 | 0 | 0 | 1 | hsa-miR-647 | > -0.01 | N/A | Sites in UTR |
| SAMD12    | NM_001101676 | sterile alpha motif domain containing 12                            | 0 | 0 | 0 | 0 | 1 | 0 | 0 | 1 | hsa-miR-647 | > -0.01 | N/A | Sites in UTR |
| BCL2L15   | NM_001010922 | BCL2-like 15                                                        | 0 | 0 | 0 | 0 | 1 | 0 | 0 | 1 | hsa-miR-647 | > -0.01 | N/A | Sites in UTR |
| LOC646851 | NM_001013647 | hypothetical LOC646851                                              | 0 | 0 | 0 | 0 | 1 | 0 | 0 | 1 | hsa-miR-647 | > -0.01 | N/A | Sites in UTR |
| ZBTB8A    | NM_001040441 | zinc finger and BTB domain containing 8A                            | 0 | 0 | 0 | 0 | 1 | 0 | 0 | 1 | hsa-miR-647 | > -0.01 | N/A | Sites in UTR |
| FAM22D    | NM_001009610 | family with sequence similarity 22, member D                        | 0 | 0 | 0 | 0 | 1 | 0 | 0 | 1 | hsa-miR-647 | > -0.01 | N/A | Sites in UTR |
| SHISA7    | NM_001145176 | shisa homolog 7 (Xenopus laevis)                                    | 0 | 0 | 0 | 0 | 1 | 0 | 0 | 1 | hsa-miR-647 | > -0.01 | N/A | Sites in UTR |
| BACH1     | NM_001186    | BTB and CNC homology 1, basic leucine zipper transcription factor 1 | 0 | 0 | 0 | 0 | 1 | 0 | 1 | 0 | hsa-miR-647 | > -0.02 | N/A | Sites in UTR |

|        |              |                                                                                   |   |   |   |   |   |   |   |   |             |         |     |              |
|--------|--------------|-----------------------------------------------------------------------------------|---|---|---|---|---|---|---|---|-------------|---------|-----|--------------|
| CLN8   | NM_018941    | ceroid-lipofuscinosis, neuronal 8 (epilepsy, progressive with mental retardation) | 0 | 0 | 0 | 0 | 1 | 0 | 1 | 0 | hsa-miR-647 | > -0.02 | N/A | Sites in UTR |
| GFRA1  | NM_001145453 | GDNF family receptor alpha 1                                                      | 0 | 0 | 0 | 0 | 1 | 0 | 1 | 0 | hsa-miR-647 | > -0.02 | N/A | Sites in UTR |
| GNG7   | NM_052847    | guanine nucleotide binding protein (G protein), gamma 7                           | 0 | 0 | 0 | 0 | 1 | 0 | 1 | 0 | hsa-miR-647 | > -0.02 | N/A | Sites in UTR |
| LMX1B  | NM_001174146 | LIM homeobox transcription factor 1, beta                                         | 1 | 0 | 1 | 0 | 0 | 0 | 0 | 0 | hsa-miR-647 | > -0.02 | N/A | Sites in UTR |
| MXD1   | NM_001202513 | MAX dimerization protein 1                                                        | 0 | 0 | 0 | 0 | 1 | 0 | 1 | 0 | hsa-miR-647 | > -0.02 | N/A | Sites in UTR |
| PAX6   | NM_000280    | paired box 6                                                                      | 0 | 0 | 0 | 0 | 1 | 0 | 1 | 0 | hsa-miR-647 | > -0.02 | N/A | Sites in UTR |
| PLAGL2 | NM_002657    | pleiomorphic adenoma gene-like 2                                                  | 0 | 0 | 0 | 0 | 1 | 0 | 1 | 0 | hsa-miR-647 | > -0.02 | N/A | Sites in UTR |
| SH3BP2 | NM_001122681 | SH3-domain binding protein 2                                                      | 0 | 0 | 0 | 0 | 1 | 0 | 1 | 0 | hsa-miR-647 | > -0.02 | N/A | Sites in UTR |
| SLC6A6 | NM_001134367 | solute carrier family 6 (neurotransmitter transporter, taurine), member 6         | 0 | 0 | 0 | 0 | 1 | 0 | 1 | 0 | hsa-miR-647 | > -0.02 | N/A | Sites in UTR |
| TNNI1  | NM_003281    | troponin I type 1 (skeletal, slow)                                                | 1 | 0 | 1 | 0 | 0 | 0 | 0 | 0 | hsa-miR-647 | > -0.02 | N/A | Sites in UTR |
| TNS1   | NM_022648    | tensin 1                                                                          | 0 | 0 | 0 | 0 | 1 | 0 | 1 | 0 | hsa-miR-647 | > -0.02 | N/A | Sites in UTR |
| NR2C2  | NM_003298    | nuclear receptor subfamily 2, group C, member 2                                   | 0 | 0 | 0 | 0 | 1 | 0 | 1 | 0 | hsa-miR-647 | > -0.02 | N/A | Sites in UTR |
| UMPS   | NM_000373    | uridine monophosphate synthetase                                                  | 0 | 0 | 0 | 0 | 1 | 0 | 1 | 0 | hsa-miR-647 | > -0.02 | N/A | Sites in UTR |
| WHSC1  | NM_133334    | Wolf-Hirschhorn syndrome candidate 1                                              | 0 | 0 | 0 | 0 | 1 | 0 | 1 | 0 | hsa-miR-647 | > -0.02 | N/A | Sites in UTR |
| PDXK   | NM_003681    | pyridoxal (pyridoxine, vitamin B6) kinase                                         | 0 | 0 | 0 | 0 | 1 | 0 | 1 | 0 | hsa-miR-647 | > -0.02 | N/A | Sites in UTR |
| ADAM19 | NM_033274    | ADAM metallopeptidase domain 19                                                   | 0 | 0 | 0 | 0 | 1 | 0 | 1 | 0 | hsa-miR-647 | > -0.02 | N/A | Sites in UTR |
| MTMR3  | NM_021090    | myotubularin related protein 3                                                    | 0 | 0 | 0 | 0 | 1 | 0 | 1 | 0 | hsa-miR-647 | > -0.02 | N/A | Sites in UTR |
| QKI    | NM_006775    | quaking homolog, KH domain RNA binding (mouse)                                    | 0 | 0 | 0 | 0 | 1 | 0 | 1 | 0 | hsa-miR-647 | > -0.02 | N/A | Sites in UTR |

|          |              |                                                            |   |   |   |   |   |   |   |   |             |         |     |              |
|----------|--------------|------------------------------------------------------------|---|---|---|---|---|---|---|---|-------------|---------|-----|--------------|
| H6PD     | NM_004285    | hexose-6-phosphate dehydrogenase (glucose 1-dehydrogenase) | 0 | 0 | 0 | 0 | 1 | 0 | 1 | 0 | hsa-miR-647 | > -0.02 | N/A | Sites in UTR |
| SEC14L5  | NM_014692    | SEC14-like 5 ( <i>S. cerevisiae</i> )                      | 0 | 0 | 0 | 0 | 1 | 0 | 1 | 0 | hsa-miR-647 | > -0.02 | N/A | Sites in UTR |
| KIAA0513 | NM_014732    | KIAA0513                                                   | 0 | 0 | 0 | 0 | 1 | 0 | 1 | 0 | hsa-miR-647 | > -0.02 | N/A | Sites in UTR |
| TBC1D5   | NM_001134380 | TBC1 domain family, member 5                               | 0 | 0 | 0 | 0 | 1 | 0 | 1 | 0 | hsa-miR-647 | > -0.02 | N/A | Sites in UTR |
| GAB2     | NM_012296    | GRB2-associated binding protein 2                          | 0 | 0 | 0 | 0 | 1 | 0 | 1 | 0 | hsa-miR-647 | > -0.02 | N/A | Sites in UTR |
| APC2     | NM_005883    | adenomatosis polyposis coli 2                              | 0 | 0 | 0 | 0 | 1 | 0 | 1 | 0 | hsa-miR-647 | > -0.02 | N/A | Sites in UTR |
| CELF1    | NM_001025596 | CUGBP, Elav-like family member 1                           | 0 | 0 | 0 | 0 | 1 | 0 | 1 | 0 | hsa-miR-647 | > -0.02 | N/A | Sites in UTR |
| SPIN1    | NM_006717    | spindlin 1                                                 | 0 | 0 | 0 | 0 | 1 | 0 | 1 | 0 | hsa-miR-647 | > -0.02 | N/A | Sites in UTR |
| ABHD2    | NM_007011    | abhydrolase domain containing 2                            | 0 | 0 | 0 | 0 | 1 | 0 | 1 | 0 | hsa-miR-647 | > -0.02 | N/A | Sites in UTR |
| WDR37    | NM_014023    | WD repeat domain 37                                        | 0 | 0 | 0 | 0 | 1 | 0 | 1 | 0 | hsa-miR-647 | > -0.02 | N/A | Sites in UTR |
| DTX4     | NM_015177    | deltex homolog 4 ( <i>Drosophila</i> )                     | 0 | 0 | 0 | 0 | 1 | 0 | 1 | 0 | hsa-miR-647 | > -0.02 | N/A | Sites in UTR |
| KIF13B   | NM_015254    | kinesin family member 13B                                  | 0 | 0 | 0 | 0 | 1 | 0 | 1 | 0 | hsa-miR-647 | > -0.02 | N/A | Sites in UTR |
| USP24    | NM_015306    | ubiquitin specific peptidase 24                            | 0 | 0 | 0 | 0 | 1 | 0 | 1 | 0 | hsa-miR-647 | > -0.02 | N/A | Sites in UTR |
| RYBP     | NM_012234    | RING1 and YY1 binding protein                              | 0 | 0 | 0 | 0 | 1 | 0 | 1 | 0 | hsa-miR-647 | > -0.02 | N/A | Sites in UTR |
| GIGYF2   | NM_001103146 | GRB10 interacting GYF protein 2                            | 0 | 0 | 0 | 0 | 1 | 0 | 1 | 0 | hsa-miR-647 | > -0.02 | N/A | Sites in UTR |
| GMEB2    | NM_012384    | glucocorticoid modulatory element binding protein 2        | 0 | 0 | 0 | 0 | 1 | 0 | 1 | 0 | hsa-miR-647 | > -0.02 | N/A | Sites in UTR |
| PACSIN1  | NM_001199583 | protein kinase C and casein kinase substrate in neurons 1  | 0 | 0 | 0 | 0 | 1 | 0 | 1 | 0 | hsa-miR-647 | > -0.02 | N/A | Sites in UTR |
| KCNIP3   | NM_001034914 | Kv channel interacting protein 3, calsenilin               | 0 | 0 | 0 | 0 | 1 | 0 | 1 | 0 | hsa-miR-647 | > -0.02 | N/A | Sites in UTR |



|           |              |                                                                           |   |   |   |   |   |   |   |   |             |         |     |              |
|-----------|--------------|---------------------------------------------------------------------------|---|---|---|---|---|---|---|---|-------------|---------|-----|--------------|
| CDON      | NM_016952    | Cdon homolog (mouse)                                                      | 0 | 0 | 0 | 0 | 1 | 0 | 1 | 0 | hsa-miR-647 | > -0.02 | N/A | Sites in UTR |
| RAB6B     | NM_016577    | RAB6B, member RAS oncogene family                                         | 0 | 0 | 0 | 0 | 1 | 0 | 1 | 0 | hsa-miR-647 | > -0.02 | N/A | Sites in UTR |
| NEURL1B   | NM_001142651 | neuralized homolog 1B (Drosophila)                                        | 0 | 0 | 0 | 0 | 1 | 0 | 1 | 0 | hsa-miR-647 | > -0.02 | N/A | Sites in UTR |
| C12orf5   | NM_020375    | chromosome 12 open reading frame 5                                        | 0 | 0 | 0 | 0 | 1 | 0 | 1 | 0 | hsa-miR-647 | > -0.02 | N/A | Sites in UTR |
| SHROOM3   | NM_020859    | shroom family member 3                                                    | 0 | 0 | 0 | 0 | 1 | 0 | 1 | 0 | hsa-miR-647 | > -0.02 | N/A | Sites in UTR |
| BEND3     | NM_001080450 | BEN domain containing 3                                                   | 0 | 0 | 0 | 0 | 1 | 0 | 1 | 0 | hsa-miR-647 | > -0.02 | N/A | Sites in UTR |
| ALX4      | NM_021926    | ALX homeobox 4                                                            | 0 | 0 | 0 | 0 | 1 | 0 | 1 | 0 | hsa-miR-647 | > -0.02 | N/A | Sites in UTR |
| FYCO1     | NM_024513    | FYVE and coiled-coil domain containing 1                                  | 0 | 0 | 0 | 0 | 1 | 0 | 1 | 0 | hsa-miR-647 | > -0.02 | N/A | Sites in UTR |
| RIC3      | NM_001135109 | resistance to inhibitors of cholinesterase 3 homolog (C. elegans)         | 0 | 0 | 0 | 0 | 1 | 0 | 1 | 0 | hsa-miR-647 | > -0.02 | N/A | Sites in UTR |
| FBXL18    | NM_024963    | F-box and leucine-rich repeat protein 18                                  | 0 | 0 | 0 | 0 | 1 | 0 | 1 | 0 | hsa-miR-647 | > -0.02 | N/A | Sites in UTR |
| OPA3      | NM_025136    | optic atrophy 3 (autosomal recessive, with chorea and spastic paraplegia) | 0 | 0 | 0 | 0 | 1 | 0 | 1 | 0 | hsa-miR-647 | > -0.02 | N/A | Sites in UTR |
| ORAI2     | NM_001126340 | ORAI calcium release-activated calcium modulator 2                        | 0 | 0 | 0 | 0 | 1 | 0 | 1 | 0 | hsa-miR-647 | > -0.02 | N/A | Sites in UTR |
| TLN2      | NM_015059    | talin 2                                                                   | 0 | 0 | 0 | 0 | 1 | 0 | 1 | 0 | hsa-miR-647 | > -0.02 | N/A | Sites in UTR |
| ZNRF3     | NM_001206998 | zinc and ring finger 3                                                    | 0 | 0 | 0 | 0 | 1 | 0 | 1 | 0 | hsa-miR-647 | > -0.02 | N/A | Sites in UTR |
| RAB11FIP4 | NM_032932    | RAB11 family interacting protein 4 (class II)                             | 0 | 0 | 0 | 0 | 1 | 0 | 1 | 0 | hsa-miR-647 | > -0.02 | N/A | Sites in UTR |
| ATCAY     | NM_033064    | ataxia, cerebellar, Cayman type                                           | 0 | 0 | 0 | 0 | 1 | 0 | 1 | 0 | hsa-miR-647 | > -0.02 | N/A | Sites in UTR |
| KIAA1644  | NM_001099294 | KIAA1644                                                                  | 0 | 0 | 0 | 0 | 1 | 0 | 1 | 0 | hsa-miR-647 | > -0.02 | N/A | Sites in UTR |
| SHANK3    | NM_001080420 | SH3 and multiple ankyrin repeat domains 3                                 | 0 | 0 | 0 | 0 | 1 | 0 | 1 | 0 | hsa-miR-647 | > -0.02 | N/A | Sites in UTR |

|           |              |                                                          |   |   |   |   |   |   |   |   |             |         |     |              |
|-----------|--------------|----------------------------------------------------------|---|---|---|---|---|---|---|---|-------------|---------|-----|--------------|
| LRRC15    | NM_001135057 | leucine rich repeat containing 15                        | 0 | 0 | 0 | 0 | 1 | 0 | 1 | 0 | hsa-miR-647 | > -0.02 | N/A | Sites in UTR |
| ASB6      | NM_001202403 | ankyrin repeat and SOCS box containing 6                 | 1 | 0 | 1 | 0 | 0 | 0 | 0 | 0 | hsa-miR-647 | > -0.02 | N/A | Sites in UTR |
| ASB7      | NM_198243    | ankyrin repeat and SOCS box containing 7                 | 0 | 0 | 0 | 0 | 1 | 0 | 1 | 0 | hsa-miR-647 | > -0.02 | N/A | Sites in UTR |
| WIPF2     | NM_133264    | WAS/WASL interacting protein family, member 2            | 0 | 0 | 0 | 0 | 1 | 0 | 1 | 0 | hsa-miR-647 | > -0.02 | N/A | Sites in UTR |
| METTL21A  | NM_001127395 | methyltransferase like 21A                               | 0 | 0 | 0 | 0 | 1 | 0 | 1 | 0 | hsa-miR-647 | > -0.02 | N/A | Sites in UTR |
| PRICKLE2  | NM_198859    | prickle homolog 2 (Drosophila)                           | 0 | 0 | 0 | 0 | 1 | 0 | 1 | 0 | hsa-miR-647 | > -0.02 | N/A | Sites in UTR |
| SLC25A30  | NM_001010875 | solute carrier family 25, member 30                      | 0 | 0 | 0 | 0 | 1 | 0 | 1 | 0 | hsa-miR-647 | > -0.02 | N/A | Sites in UTR |
| C17orf103 | NM_152914    | chromosome 17 open reading frame 103                     | 0 | 0 | 0 | 0 | 1 | 0 | 1 | 0 | hsa-miR-647 | > -0.02 | N/A | Sites in UTR |
| GLDN      | NM_181789    | gliomedin                                                | 0 | 0 | 0 | 0 | 1 | 0 | 1 | 0 | hsa-miR-647 | > -0.02 | N/A | Sites in UTR |
| BEND4     | NM_001159547 | BEN domain containing 4                                  | 0 | 0 | 0 | 0 | 1 | 0 | 1 | 0 | hsa-miR-647 | > -0.02 | N/A | Sites in UTR |
| POTEM     | NM_001145442 | POTE ankyrin domain family, member M                     | 0 | 0 | 0 | 0 | 1 | 0 | 1 | 0 | hsa-miR-647 | > -0.02 | N/A | Sites in UTR |
| RBMS2     | NM_002898    | RNA binding motif, single stranded interacting protein 2 | 0 | 0 | 0 | 0 | 2 | 0 | 0 | 2 | hsa-miR-647 | > -0.02 | N/A | Sites in UTR |
| KIAA1244  | NM_020340    | KIAA1244                                                 | 0 | 0 | 0 | 0 | 2 | 0 | 0 | 2 | hsa-miR-647 | > -0.02 | N/A | Sites in UTR |
| SHROOM4   | NM_020717    | shroom family member 4                                   | 0 | 0 | 0 | 0 | 2 | 0 | 0 | 2 | hsa-miR-647 | > -0.02 | N/A | Sites in UTR |
| SLC46A1   | NM_001242366 | solute carrier family 46 (folate transporter), member 1  | 0 | 0 | 0 | 0 | 2 | 0 | 0 | 2 | hsa-miR-647 | > -0.02 | N/A | Sites in UTR |
| RBM33     | NM_053043    | RNA binding motif protein 33                             | 0 | 0 | 0 | 0 | 2 | 0 | 0 | 2 | hsa-miR-647 | > -0.02 | N/A | Sites in UTR |
| ADARB1    | NM_001112    | adenosine deaminase, RNA-specific, B1                    | 0 | 0 | 0 | 0 | 1 | 1 | 0 | 0 | hsa-miR-647 | > -0.03 | N/A | Sites in UTR |
| ZFX3      | NM_001164766 | zinc finger homeobox 3                                   | 1 | 1 | 0 | 0 | 0 | 0 | 0 | 0 | hsa-miR-647 | > -0.03 | N/A | Sites in UTR |

|          |              |                                                                                  |   |   |   |   |   |   |   |   |             |         |     |              |
|----------|--------------|----------------------------------------------------------------------------------|---|---|---|---|---|---|---|---|-------------|---------|-----|--------------|
| NTRK2    | NM_001007097 | neurotrophic tyrosine kinase, receptor, type 2                                   | 0 | 0 | 0 | 0 | 1 | 1 | 0 | 0 | hsa-miR-647 | > -0.03 | N/A | Sites in UTR |
| SBNO1    | NM_001167856 | strawberry notch homolog 1 (Drosophila)                                          | 0 | 0 | 0 | 0 | 1 | 1 | 0 | 0 | hsa-miR-647 | > -0.03 | N/A | Sites in UTR |
| SLC6A19  | NM_001003841 | solute carrier family 6 (neutral amino acid transporter), member 19              | 0 | 0 | 0 | 0 | 1 | 1 | 0 | 0 | hsa-miR-647 | > -0.03 | N/A | Sites in UTR |
| ABR      | NM_001092    | active BCR-related gene                                                          | 0 | 0 | 0 | 0 | 2 | 0 | 1 | 1 | hsa-miR-647 | > -0.03 | N/A | Sites in UTR |
| ZHX3     | NM_015035    | zinc fingers and homeoboxes 3                                                    | 0 | 0 | 0 | 0 | 2 | 0 | 1 | 1 | hsa-miR-647 | > -0.03 | N/A | Sites in UTR |
| ZBTB43   | NM_001135776 | zinc finger and BTB domain containing 43                                         | 0 | 0 | 0 | 0 | 2 | 0 | 1 | 1 | hsa-miR-647 | > -0.03 | N/A | Sites in UTR |
| VPS53    | NM_001128159 | vacuolar protein sorting 53 homolog (S. cerevisiae)                              | 0 | 0 | 0 | 0 | 2 | 0 | 1 | 1 | hsa-miR-647 | > -0.03 | N/A | Sites in UTR |
| TTYH3    | NM_025250    | tweety homolog 3 (Drosophila)                                                    | 0 | 0 | 0 | 0 | 3 | 0 | 2 | 1 | hsa-miR-647 | > -0.03 | N/A | Sites in UTR |
| ADAMTS15 | NM_139055    | ADAM metallopeptidase with thrombospondin type 1 motif, 15                       | 0 | 0 | 0 | 0 | 2 | 0 | 1 | 1 | hsa-miR-647 | > -0.03 | N/A | Sites in UTR |
| CLYBL    | NM_206808    | citrate lyase beta like                                                          | 0 | 0 | 0 | 0 | 2 | 0 | 1 | 1 | hsa-miR-647 | > -0.03 | N/A | Sites in UTR |
| IGFBP5   | NM_000599    | insulin-like growth factor binding protein 5                                     | 0 | 0 | 0 | 0 | 2 | 0 | 2 | 0 | hsa-miR-647 | > -0.04 | N/A | Sites in UTR |
| MTHFR    | NM_005957    | methylenetetrahydrofolate reductase (NAD(P)H)                                    | 0 | 0 | 0 | 0 | 2 | 0 | 2 | 0 | hsa-miR-647 | > -0.04 | N/A | Sites in UTR |
| TK2      | NM_001172643 | thymidine kinase 2, mitochondrial                                                | 0 | 0 | 0 | 0 | 2 | 0 | 2 | 0 | hsa-miR-647 | > -0.04 | N/A | Sites in UTR |
| SLC7A5   | NM_003486    | solute carrier family 7 (amino acid transporter light chain, L system), member 5 | 0 | 0 | 0 | 0 | 2 | 0 | 2 | 0 | hsa-miR-647 | > -0.04 | N/A | Sites in UTR |
| JRK      | NM_003724    | jerky homolog (mouse)                                                            | 0 | 0 | 0 | 0 | 2 | 0 | 2 | 0 | hsa-miR-647 | > -0.04 | N/A | Sites in UTR |
| WDR52    | NM_001164496 | WD repeat domain 52                                                              | 0 | 0 | 0 | 0 | 2 | 0 | 2 | 0 | hsa-miR-647 | > -0.04 | N/A | Sites in UTR |
| PDLIM2   | NM_176871    | PDZ and LIM domain 2 (mystique)                                                  | 0 | 0 | 0 | 0 | 2 | 0 | 2 | 0 | hsa-miR-647 | > -0.04 | N/A | Sites in UTR |
| KSR2     | NM_173598    | kinase suppressor of ras 2                                                       | 0 | 0 | 0 | 0 | 2 | 0 | 2 | 0 | hsa-miR-647 | > -0.04 | N/A | Sites in UTR |

|         |              |                                                                    |   |   |   |   |   |   |   |   |             |         |     |              |
|---------|--------------|--------------------------------------------------------------------|---|---|---|---|---|---|---|---|-------------|---------|-----|--------------|
| PDPK1   | NM_002613    | 3-phosphoinositide dependent protein kinase-1                      | 0 | 0 | 0 | 0 | 3 | 0 | 1 | 2 | hsa-miR-647 | > -0.04 | N/A | Sites in UTR |
| MPRIP   | NM_015134    | myosin phosphatase Rho interacting protein                         | 0 | 0 | 0 | 0 | 4 | 0 | 4 | 0 | hsa-miR-647 | > -0.08 | N/A | Sites in UTR |
| APOE    | NM_000041    | apolipoprotein E                                                   | 0 | 0 | 0 | 0 | 1 | 0 | 1 | 0 | hsa-miR-647 | N/A     | N/A | Sites in UTR |
| BRCA1   | NM_007294    | breast cancer 1, early onset                                       | 0 | 0 | 0 | 0 | 1 | 0 | 1 | 0 | hsa-miR-647 | N/A     | N/A | Sites in UTR |
| C3AR1   | NM_004054    | complement component 3a receptor 1                                 | 0 | 0 | 0 | 0 | 1 | 1 | 0 | 0 | hsa-miR-647 | N/A     | N/A | Sites in UTR |
| CTSK    | NM_000396    | cathepsin K                                                        | 0 | 0 | 0 | 0 | 1 | 0 | 0 | 1 | hsa-miR-647 | N/A     | N/A | Sites in UTR |
| EIF4G2  | NM_001042559 | eukaryotic translation initiation factor 4 gamma, 2                | 1 | 0 | 0 | 1 | 0 | 0 | 0 | 0 | hsa-miR-647 | N/A     | N/A | Sites in UTR |
| FABP6   | NM_001040442 | fatty acid binding protein 6, ileal                                | 0 | 0 | 0 | 0 | 1 | 0 | 1 | 0 | hsa-miR-647 | N/A     | N/A | Sites in UTR |
| GSK3B   | NM_001146156 | glycogen synthase kinase 3 beta                                    | 1 | 0 | 1 | 0 | 0 | 0 | 0 | 0 | hsa-miR-647 | N/A     | N/A | Sites in UTR |
| GSTA3   | NM_000847    | glutathione S-transferase alpha 3                                  | 0 | 0 | 0 | 0 | 1 | 0 | 1 | 0 | hsa-miR-647 | N/A     | N/A | Sites in UTR |
| IGFBP2  | NM_000597    | insulin-like growth factor binding protein 2, 36kDa                | 0 | 0 | 0 | 0 | 1 | 0 | 1 | 0 | hsa-miR-647 | N/A     | N/A | Sites in UTR |
| LAG3    | NM_002286    | lymphocyte-activation gene 3                                       | 0 | 0 | 0 | 0 | 1 | 0 | 1 | 0 | hsa-miR-647 | N/A     | N/A | Sites in UTR |
| LAMA5   | NM_005560    | laminin, alpha 5                                                   | 0 | 0 | 0 | 0 | 1 | 0 | 0 | 1 | hsa-miR-647 | N/A     | N/A | Sites in UTR |
| MAGEA1  | NM_004988    | melanoma antigen family A, 1 (directs expression of antigen MZ2-E) | 0 | 0 | 0 | 0 | 1 | 1 | 0 | 0 | hsa-miR-647 | N/A     | N/A | Sites in UTR |
| MAGEA4  | NM_001011548 | melanoma antigen family A, 4                                       | 0 | 0 | 0 | 0 | 1 | 0 | 1 | 0 | hsa-miR-647 | N/A     | N/A | Sites in UTR |
| PCSK5   | NM_006200    | proprotein convertase subtilisin/kexin type 5                      | 0 | 0 | 0 | 0 | 1 | 0 | 1 | 0 | hsa-miR-647 | N/A     | N/A | Sites in UTR |
| PDGFA   | NM_002607    | platelet-derived growth factor alpha polypeptide                   | 0 | 0 | 0 | 0 | 1 | 1 | 0 | 0 | hsa-miR-647 | N/A     | N/A | Sites in UTR |
| RARRES3 | NM_004585    | retinoic acid receptor responder (tazarotene induced) 3            | 0 | 0 | 0 | 0 | 1 | 0 | 1 | 0 | hsa-miR-647 | N/A     | N/A | Sites in UTR |

|          |              |                                                                                   |   |   |   |   |   |   |   |   |             |     |     |              |
|----------|--------------|-----------------------------------------------------------------------------------|---|---|---|---|---|---|---|---|-------------|-----|-----|--------------|
| S100B    | NM_006272    | S100 calcium binding protein B                                                    | 0 | 0 | 0 | 0 | 1 | 1 | 0 | 0 | hsa-miR-647 | N/A | N/A | Sites in UTR |
| CXCL12   | NM_199168    | chemokine (C-X-C motif) ligand 12                                                 | 0 | 0 | 0 | 0 | 1 | 0 | 0 | 1 | hsa-miR-647 | N/A | N/A | Sites in UTR |
| TSHR     | NM_001018036 | thyroid stimulating hormone receptor                                              | 0 | 0 | 0 | 0 | 1 | 0 | 1 | 0 | hsa-miR-647 | N/A | N/A | Sites in UTR |
| UBA7     | NM_003335    | ubiquitin-like modifier activating enzyme 7                                       | 0 | 0 | 0 | 0 | 1 | 0 | 1 | 0 | hsa-miR-647 | N/A | N/A | Sites in UTR |
| APOL1    | NM_001136540 | apolipoprotein L, 1                                                               | 0 | 0 | 0 | 0 | 1 | 0 | 1 | 0 | hsa-miR-647 | N/A | N/A | Sites in UTR |
| FCN3     | NM_003665    | ficolin (collagen/fibrinogen domain containing) 3 (Hakata antigen)                | 0 | 0 | 0 | 0 | 1 | 0 | 1 | 0 | hsa-miR-647 | N/A | N/A | Sites in UTR |
| CHRD     | NM_003741    | chordin                                                                           | 0 | 0 | 0 | 0 | 1 | 0 | 1 | 0 | hsa-miR-647 | N/A | N/A | Sites in UTR |
| TRADD    | NM_003789    | TNFRSF1A-associated via death domain                                              | 0 | 0 | 0 | 0 | 1 | 0 | 1 | 0 | hsa-miR-647 | N/A | N/A | Sites in UTR |
| AP1M1    | NM_001130524 | adaptor-related protein complex 1, mu 1 subunit                                   | 0 | 0 | 0 | 0 | 1 | 1 | 0 | 0 | hsa-miR-647 | N/A | N/A | Sites in UTR |
| CYTH1    | NM_004762    | cytohesin 1                                                                       | 0 | 0 | 0 | 0 | 1 | 1 | 0 | 0 | hsa-miR-647 | N/A | N/A | Sites in UTR |
| ARPC3    | NM_005719    | actin related protein 2/3 complex, subunit 3, 21kDa                               | 0 | 0 | 0 | 0 | 1 | 0 | 1 | 0 | hsa-miR-647 | N/A | N/A | Sites in UTR |
| MTHFS    | NM_001199758 | 5,10-methylenetetrahydrofolate synthetase (5-formyltetrahydrofolate cyclo-ligase) | 0 | 0 | 0 | 0 | 1 | 0 | 0 | 1 | hsa-miR-647 | N/A | N/A | Sites in UTR |
| ARL2BP   | NM_012106    | ADP-ribosylation factor-like 2 binding protein                                    | 0 | 0 | 0 | 0 | 1 | 0 | 0 | 1 | hsa-miR-647 | N/A | N/A | Sites in UTR |
| APOL2    | NM_030882    | apolipoprotein L, 2                                                               | 0 | 0 | 0 | 0 | 1 | 0 | 1 | 0 | hsa-miR-647 | N/A | N/A | Sites in UTR |
| FBXL6    | NM_012162    | F-box and leucine-rich repeat protein 6                                           | 0 | 0 | 0 | 0 | 1 | 0 | 1 | 0 | hsa-miR-647 | N/A | N/A | Sites in UTR |
| PKD2L2   | NM_014386    | polycystic kidney disease 2-like 2                                                | 0 | 0 | 0 | 0 | 1 | 0 | 0 | 1 | hsa-miR-647 | N/A | N/A | Sites in UTR |
| ZNF446   | NM_017908    | zinc finger protein 446                                                           | 0 | 0 | 0 | 0 | 1 | 0 | 1 | 0 | hsa-miR-647 | N/A | N/A | Sites in UTR |
| CDK5RAP2 | NM_001011649 | CDK5 regulatory subunit associated protein 2                                      | 1 | 0 | 0 | 1 | 0 | 0 | 0 | 0 | hsa-miR-647 | N/A | N/A | Sites in UTR |

|           |              |                                                                                      |   |   |   |   |   |   |   |   |             |     |     |              |
|-----------|--------------|--------------------------------------------------------------------------------------|---|---|---|---|---|---|---|---|-------------|-----|-----|--------------|
| PDXP      | NM_020315    | pyridoxal (pyridoxine, vitamin B6) phosphatase                                       | 0 | 0 | 0 | 0 | 1 | 0 | 1 | 0 | hsa-miR-647 | N/A | N/A | Sites in UTR |
| ANKRD36B  | NM_025190    | ankyrin repeat domain 36B                                                            | 0 | 0 | 0 | 0 | 1 | 0 | 0 | 1 | hsa-miR-647 | N/A | N/A | Sites in UTR |
| SPTBN4    | NM_025213    | spectrin, beta, non-erythrocytic 4                                                   | 0 | 0 | 0 | 0 | 1 | 0 | 0 | 1 | hsa-miR-647 | N/A | N/A | Sites in UTR |
| C14orf93  | NM_001130706 | chromosome 14 open reading frame 93                                                  | 0 | 0 | 0 | 0 | 1 | 0 | 0 | 1 | hsa-miR-647 | N/A | N/A | Sites in UTR |
| IRF2BPL   | NM_024496    | interferon regulatory factor 2 binding protein-like                                  | 0 | 0 | 0 | 0 | 1 | 0 | 1 | 0 | hsa-miR-647 | N/A | N/A | Sites in UTR |
| RAB17     | NM_022449    | RAB17, member RAS oncogene family                                                    | 0 | 0 | 0 | 0 | 1 | 0 | 1 | 0 | hsa-miR-647 | N/A | N/A | Sites in UTR |
| KLC2      | NM_001134774 | kinesin light chain 2                                                                | 0 | 0 | 0 | 0 | 1 | 0 | 1 | 0 | hsa-miR-647 | N/A | N/A | Sites in UTR |
| IPO4      | NM_024658    | importin 4                                                                           | 0 | 0 | 0 | 0 | 1 | 0 | 1 | 0 | hsa-miR-647 | N/A | N/A | Sites in UTR |
| DHRS12    | NM_001031719 | dehydrogenase/reductase (SDR family) member 12                                       | 0 | 0 | 0 | 0 | 1 | 0 | 1 | 0 | hsa-miR-647 | N/A | N/A | Sites in UTR |
| APOL3     | NM_145640    | apolipoprotein L, 3                                                                  | 0 | 0 | 0 | 0 | 1 | 0 | 1 | 0 | hsa-miR-647 | N/A | N/A | Sites in UTR |
| JHDM1D    | NM_030647    | jumonji C domain containing histone demethylase 1 homolog D ( <i>S. cerevisiae</i> ) | 0 | 0 | 0 | 0 | 1 | 0 | 1 | 0 | hsa-miR-647 | N/A | N/A | Sites in UTR |
| C3orf20   | NM_001184957 | chromosome 3 open reading frame 20                                                   | 0 | 0 | 0 | 0 | 1 | 1 | 0 | 0 | hsa-miR-647 | N/A | N/A | Sites in UTR |
| SGK196    | NM_032237    | protein kinase-like protein SgK196                                                   | 0 | 0 | 0 | 0 | 1 | 0 | 0 | 1 | hsa-miR-647 | N/A | N/A | Sites in UTR |
| HDGFRP2   | NM_001001520 | hepatoma-derived growth factor-related protein 2                                     | 0 | 0 | 0 | 0 | 1 | 0 | 1 | 0 | hsa-miR-647 | N/A | N/A | Sites in UTR |
| CCNB3     | NM_033031    | cyclin B3                                                                            | 0 | 0 | 0 | 0 | 1 | 0 | 1 | 0 | hsa-miR-647 | N/A | N/A | Sites in UTR |
| TGIF2LY   | NM_139214    | TGFB-induced factor homeobox 2-like, Y-linked                                        | 0 | 0 | 0 | 0 | 1 | 0 | 0 | 1 | hsa-miR-647 | N/A | N/A | Sites in UTR |
| SNX29     | NM_001080530 | sorting nexin 29                                                                     | 0 | 0 | 0 | 0 | 1 | 0 | 1 | 0 | hsa-miR-647 | N/A | N/A | Sites in UTR |
| C20orf114 | NM_033197    | chromosome 20 open reading frame 114                                                 | 0 | 0 | 0 | 0 | 1 | 0 | 1 | 0 | hsa-miR-647 | N/A | N/A | Sites in UTR |

|            |              |                                                 |   |   |   |   |   |   |   |   |             |     |     |              |
|------------|--------------|-------------------------------------------------|---|---|---|---|---|---|---|---|-------------|-----|-----|--------------|
| RNF166     | NM_001171815 | ring finger protein 166                         | 0 | 0 | 0 | 0 | 1 | 0 | 1 | 0 | hsa-miR-647 | N/A | N/A | Sites in UTR |
| ARHGEF19   | NM_153213    | Rho guanine nucleotide exchange factor (GEF) 19 | 0 | 0 | 0 | 0 | 1 | 0 | 1 | 0 | hsa-miR-647 | N/A | N/A | Sites in UTR |
| KRT78      | NM_173352    | keratin 78                                      | 0 | 0 | 0 | 0 | 1 | 0 | 1 | 0 | hsa-miR-647 | N/A | N/A | Sites in UTR |
| TLL10      | NM_001130045 | tubulin tyrosine ligase-like family, member 10  | 0 | 0 | 0 | 0 | 1 | 0 | 1 | 0 | hsa-miR-647 | N/A | N/A | Sites in UTR |
| IGSF22     | NM_173588    | immunoglobulin superfamily, member 22           | 0 | 0 | 0 | 0 | 1 | 0 | 0 | 1 | hsa-miR-647 | N/A | N/A | Sites in UTR |
| MYLK4      | NM_001012418 | myosin light chain kinase family, member 4      | 0 | 0 | 0 | 0 | 1 | 0 | 1 | 0 | hsa-miR-647 | N/A | N/A | Sites in UTR |
| DPPA5      | NM_001025290 | developmental pluripotency associated 5         | 0 | 0 | 0 | 0 | 1 | 0 | 0 | 1 | hsa-miR-647 | N/A | N/A | Sites in UTR |
| IGF2       | NM_001042376 | insulin-like growth factor 2 (somatomedin A)    | 0 | 0 | 0 | 0 | 1 | 0 | 1 | 0 | hsa-miR-647 | N/A | N/A | Sites in UTR |
| INS-IGF2   | NM_001042376 | INS-IGF2 readthrough                            | 0 | 0 | 0 | 0 | 1 | 0 | 1 | 0 | hsa-miR-647 | N/A | N/A | Sites in UTR |
| ST20-MTHFS | NM_001199760 | ST20-MTHFS readthrough                          | 0 | 0 | 0 | 0 | 1 | 0 | 0 | 1 | hsa-miR-647 | N/A | N/A | Sites in UTR |
